# Supplementary material for: A Count-Based Binary Decision Method For Target Blood Pressure Achievement in Home Blood Pressure Monitoring Data Interpretation For Clinical Practices
Source: Research Square preprint supplement (doi:10.21203/rs.3.rs-728435/v1), 2021-07-24
Supplement: Supplementary file 3 [file 537954943f1794ed51038972.xlsx]

## Sheet: list_1
Result	nx	reading.date	reading.time	sbp	dbp	day	minutes	time	res.sbp	res.dbp	dtime	dsbp	ddbp	sbp.bi	dbp.bi
gosong01_박영배	1	2007-09-13	12:28:00	135	99	0	748	748	-4.76665	5.25464	NA	NA	NA	1	1
gosong01_박영배	2	2007-09-14	05:56:00	139	107	1	356	1796	-1.54171	11.4635	1048	4	8	1	1
gosong01_박영배	3	2007-09-14	16:27:00	138	106	1	987	2427	-3.00837	9.385	631	-1	-1	1	1
gosong01_박영배	4	2007-09-14	21:06:00	145	60	1	1266	2706	3.7853	-37.0918	279	7	-46	1	0
gosong01_박영배	5	2007-09-15	11:41:00	148	96	2	701	3581	6.13819	-2.58734	875	3	36	1	1
gosong01_박영배	6	2007-09-16	18:09:00	148	108	3	1089	5409	4.78628	6.28837	1828	0	12	1	1
gosong01_박영배	7	2007-09-16	20:54:00	147	109	3	1254	5574	3.66425	7.00636	165	-1	1	1	1
gosong01_박영배	8	2007-09-17	06:10:00	147	116	4	370	6130	3.25306	13.0561	556	0	7	1	1
gosong01_박영배	9	2007-09-17	11:52:00	144	110	4	712	6472	0.000132137	6.47156	342	-3	-6	1	1
gosong01_박영배	10	2007-09-17	18:52:00	132	85	4	1132	6892	-12.3105	-19.2463	420	-12	-25	0	1
Result	nx	reading.date	reading.time	sbp	dbp	day	minutes	time	res.sbp	res.dbp	dtime	dsbp	ddbp	sbp.bi	dbp.bi
gosong02_김건수	1	2007-10-11	07:58:00	137	81	0	478	478	4.53247	2.18705	NA	NA	NA	1	0
gosong02_김건수	2	2007-10-12	04:15:00	136	82	1	255	1695	2.8944	3.60768	1217	-1	1	1	0
gosong02_김건수	3	2007-10-12	11:19:00	127	78	1	679	2119	-6.3279	-0.245773	424	-9	-4	0	0
gosong02_김건수	4	2007-10-12	15:22:00	133	72	1	922	2362	-0.4553	-6.16179	243	6	-6	0	0
gosong02_김건수	5	2007-10-12	19:28:00	137	76	1	1168	2608	3.41572	-2.07676	246	4	4	1	0
gosong02_김건수	6	2007-10-13	04:42:00	131	84	2	282	3162	-2.87474	6.11472	554	-6	8	0	0
gosong02_김건수	7	2007-10-13	08:57:00	131	73	2	537	3417	-3.00843	-4.79715	255	0	-11	0	0
gosong02_김건수	8	2007-10-13	18:24:00	144	88	2	1104	3984	9.69429	10.3988	567	13	15	1	1
gosong02_김건수	9	2007-10-13	19:49:00	133	72	2	1189	4069	-1.35027	-5.5718	85	-11	-16	0	0
gosong02_김건수	10	2007-10-14	05:03:00	141	82	3	303	4623	6.35927	4.61968	554	8	10	1	0
gosong02_김건수	11	2007-10-14	08:10:00	125	73	3	490	4810	-9.73877	-4.31569	187	-16	-9	0	0
gosong02_김건수	12	2007-10-14	18:46:00	124	71	3	1126	5446	-11.0722	-6.09587	636	-1	-2	0	0
gosong02_김건수	13	2007-10-14	20:02:00	123	72	3	1202	5522	-12.1121	-5.0696	76	-1	1	0	0
gosong02_김건수	14	2007-10-15	04:15:00	136	79	4	255	6015	0.62945	2.10079	493	13	7	1	0
gosong02_김건수	15	2007-10-15	08:35:00	149	77	4	515	6275	13.4931	0.190652	260	13	-2	1	0
gosong02_김건수	16	2007-10-15	19:16:00	143	74	4	1156	6916	7.15706	-2.5878	641	-6	-3	1	0
gosong02_김건수	17	2007-10-15	20:28:00	134	78	4	1228	6988	-1.88069	1.43708	72	-9	4	0	0
gosong02_김건수	18	2007-10-16	04:15:00	138	85	5	255	7455	1.87446	8.59849	467	4	7	1	1
gosong02_김건수	19	2007-10-16	07:34:00	135	74	5	454	7654	-1.22987	-2.33273	199	-3	-11	1	0
Result	nx	reading.date	reading.time	sbp	dbp	day	minutes	time	res.sbp	res.dbp	dtime	dsbp	ddbp	sbp.bi	dbp.bi
gosong03_장순이	1	2007-11-27	17:44:00	136	123	0	1064	1064	27.7175	43.3547	NA	NA	NA	1	1
gosong03_장순이	2	2007-11-28	07:18:00	49	26	1	438	1878	-65.9694	-58.7475	814	-87	-97	0	0
gosong03_장순이	3	2007-11-28	17:32:00	128	86	1	1052	2492	7.98672	-2.5961	614	79	60	0	1
gosong03_장순이	4	2007-11-29	07:12:00	138	96	2	432	3312	11.2506	2.2641	820	10	10	1	1
gosong03_장순이	5	2007-11-29	17:34:00	149	112	2	1054	3934	17.141	14.3654	622	11	16	1	1
gosong03_장순이	6	2007-11-29	17:36:00	148	109	2	1056	3936	16.1245	11.3528	2	-1	-3	1	1
gosong03_장순이	7	2007-11-30	17:24:00	143	103	3	1044	5364	-0.606195	-3.59793	1428	-5	-6	1	1
gosong03_장순이	8	2007-11-30	17:26:00	146	91	3	1046	5366	2.37738	-15.6105	2	3	-12	1	1
gosong03_장순이	9	2007-12-01	06:55:00	142	106	4	415	6175	-8.2684	-5.68132	809	-4	15	1	1
gosong03_장순이	10	2007-12-01	16:01:00	147	130	4	961	6721	-7.75368	14.8963	546	5	24	1	1
Result	nx	reading.date	reading.time	sbp	dbp	day	minutes	time	res.sbp	res.dbp	dtime	dsbp	ddbp	sbp.bi	dbp.bi
gosong04_박순덕	1	2007-11-01	14:01:00	159	101	0	841	841	19.6545	14.9924	NA	NA	NA	1	1
gosong04_박순덕	2	2007-11-01	22:19:00	163	97	0	1339	1339	24.5223	11.0753	498	4	-4	1	1
gosong04_박순덕	3	2007-11-01	22:21:00	135	76	0	1341	1341	-3.47426	-9.92433	2	-28	-21	1	0
gosong04_박순덕	4	2007-11-02	06:47:00	123	85	1	407	1847	-14.5925	-0.840029	506	-12	9	0	1
gosong04_박순덕	5	2007-11-02	06:49:00	116	79	1	409	1849	-21.5891	-6.8397	2	-7	-6	0	0
gosong04_박순덕	6	2007-11-02	20:27:00	123	77	1	1227	2667	-13.1637	-8.70341	818	7	-2	0	0
gosong04_박순덕	7	2007-11-02	20:31:00	133	84	1	1231	2671	-3.15669	-1.70274	4	10	7	0	0
gosong04_박순덕	8	2007-11-03	21:58:00	167	88	2	1318	4198	33.5042	2.55167	1527	34	4	1	1
gosong04_박순덕	9	2007-11-03	22:00:00	146	92	2	1320	4200	12.5076	6.552	2	-21	4	1	1
gosong04_박순덕	10	2007-11-04	06:58:00	120	84	3	418	4738	-12.5549	-1.35836	538	-26	-8	0	0
gosong04_박순덕	11	2007-11-04	07:00:00	112	82	3	420	4740	-20.5514	-3.35803	2	-8	-2	0	0
gosong04_박순덕	12	2007-11-04	21:06:00	135	80	3	1266	5586	3.92279	-5.21708	846	23	-2	1	0
gosong04_박순덕	13	2007-11-04	21:08:00	124	80	3	1268	5588	-7.07372	-5.21675	2	-11	0	0	0
gosong04_박순덕	14	2007-11-05	07:10:00	116	76	4	430	6190	-14.0247	-9.11645	602	-8	-4	0	0
gosong04_박순덕	15	2007-11-05	07:12:00	114	80	4	432	6192	-16.0212	-5.11612	2	-2	4	0	0
gosong04_박순덕	16	2007-11-05	18:13:00	140	92	4	1093	6853	11.1306	6.99401	661	26	12	1	1
gosong04_박순덕	17	2007-11-05	18:15:00	132	92	4	1095	6855	3.13406	6.99435	2	-8	0	0	1
gosong04_박순덕	18	2007-11-06	06:28:00	133	91	5	388	7588	5.41134	6.11647	733	1	-1	0	1
gosong04_박순덕	19	2007-11-06	06:30:00	140	87	5	390	7590	12.4148	2.1168	2	7	-4	1	1
Result	nx	reading.date	reading.time	sbp	dbp	day	minutes	time	res.sbp	res.dbp	dtime	dsbp	ddbp	sbp.bi	dbp.bi
gosong05_윤지현	1	2007-10-11	07:54:00	152	90	0	474	474	10.3262	3.58255	NA	NA	NA	1	1
gosong05_윤지현	2	2007-10-11	11:51:00	162	90	0	711	711	20.834	3.68135	237	10	0	1	1
gosong05_윤지현	3	2007-10-11	11:53:00	162	100	0	713	713	20.8383	13.6822	2	0	10	1	1
gosong05_윤지현	4	2007-10-12	04:10:00	131	88	1	250	1690	-8.06847	2.08948	977	-31	-12	0	1
gosong05_윤지현	5	2007-10-12	11:14:00	140	84	1	674	2114	1.83996	-1.73376	424	9	-4	1	0
gosong05_윤지현	6	2007-10-12	15:18:00	128	84	1	918	2358	-9.63726	-1.63204	244	-12	0	0	0
gosong05_윤지현	7	2007-10-12	19:23:00	132	79	1	1163	2603	-5.11234	-6.5299	245	4	-5	0	0
gosong05_윤지현	8	2007-10-13	06:44:00	106	72	2	404	3284	-29.6533	-13.246	681	-26	-7	0	0
gosong05_윤지현	9	2007-10-13	08:52:00	117	82	2	532	3412	-18.379	-3.19264	128	11	10	0	0
gosong05_윤지현	10	2007-10-13	18:19:00	141	87	2	1099	3979	6.83579	2.04373	567	24	5	1	1
gosong05_윤지현	11	2007-10-13	19:44:00	127	87	2	1184	4064	-6.9821	2.07917	85	-14	0	0	1
gosong05_윤지현	12	2007-10-14	05:04:00	127	71	3	304	4624	-5.78228	-13.6874	560	0	-16	0	0
gosong05_윤지현	13	2007-10-14	08:05:00	132	80	3	485	4805	-0.394477	-4.61192	181	5	9	0	0
gosong05_윤지현	14	2007-10-14	18:42:00	129	82	3	1122	5442	-2.02968	-2.34636	637	-3	2	0	0
gosong05_윤지현	15	2007-10-14	19:57:00	128	86	3	1197	5517	-2.86899	1.68491	75	-1	4	0	1
gosong05_윤지현	16	2007-10-15	04:11:00	117	84	4	251	6011	-12.8106	-0.109153	494	-11	-2	0	0
gosong05_윤지현	17	2007-10-15	08:31:00	127	83	4	511	6271	-2.25352	-1.00076	260	10	-1	0	0
gosong05_윤지현	18	2007-10-15	19:11:00	148	93	4	1151	6911	20.1177	9.26604	640	21	10	1	1
gosong05_윤지현	19	2007-10-15	20:24:00	124	84	4	1224	6984	-3.72589	0.296477	73	-24	-9	0	0
gosong05_윤지현	20	2007-10-16	04:16:00	132	82	5	256	7456	5.28538	-1.50675	472	8	-2	0	0
gosong05_윤지현	21	2007-10-16	07:33:00	135	94	5	453	7653	8.70746	10.5754	197	3	12	1	1
gosong05_윤지현	22	2007-10-16	09:09:00	139	84	5	549	7749	12.9131	0.615395	96	4	-10	1	0
Result	nx	reading.date	reading.time	sbp	dbp	day	minutes	time	res.sbp	res.dbp	dtime	dsbp	ddbp	sbp.bi	dbp.bi
gosong06_정천훈	1	2007-11-27	18:18:00	138	96	0	1098	1098	-3.98761	5.61651	NA	NA	NA	1	1
gosong06_정천훈	2	2007-11-27	18:21:00	134	91	0	1101	1101	-7.99326	0.614602	3	-4	-5	0	1
gosong06_정천훈	3	2007-11-28	07:47:00	152	97	1	467	1907	8.48926	6.10221	806	18	6	1	1
gosong06_정천훈	4	2007-11-28	08:25:00	146	94	1	505	1945	2.41772	3.07805	38	-6	-3	1	1
gosong06_정천훈	5	2007-11-28	20:04:00	148	104	1	1204	2644	3.10169	12.6337	699	2	10	1	1
gosong06_정천훈	6	2007-11-28	20:21:00	123	66	1	1221	2661	-21.9303	-25.3771	17	-25	-38	0	0
gosong06_정천훈	7	2007-11-29	07:25:00	142	84	2	445	3325	-4.18044	-7.79924	664	19	18	1	0
gosong06_정천훈	8	2007-11-29	08:41:00	142	71	2	521	3401	-4.32353	-20.8476	76	0	-13	1	0
gosong06_정천훈	9	2007-11-29	19:09:00	143	110	2	1149	4029	-4.50588	17.7532	628	1	39	1	1
gosong06_정천훈	10	2007-11-29	19:12:00	176	97	2	1152	4032	28.4885	4.7513	3	33	-13	1	1
gosong06_정천훈	11	2007-11-30	08:56:00	136	92	3	536	4856	-13.0629	-0.772536	824	-40	-5	1	1
gosong06_정천훈	12	2007-11-30	17:01:00	176	100	3	1021	5341	26.024	6.91914	485	40	8	1	1
gosong06_정천훈	13	2007-11-30	17:06:00	174	104	3	1026	5346	24.0146	10.916	5	-2	4	1	1
gosong06_정천훈	14	2007-12-01	08:00:00	136	74	4	480	6240	-15.6686	-19.6524	894	-38	-30	1	0
gosong06_정천훈	15	2007-12-01	08:02:00	137	84	4	482	6242	-14.6724	-9.65365	2	1	10	1	0
gosong06_정천훈	16	2007-12-01	20:37:00	195	125	4	1237	6997	41.9062	30.8664	755	58	41	1	1
gosong06_정천훈	17	2007-12-02	08:49:00	108	80	5	529	7729	-46.472	-14.599	732	-87	-45	0	0
gosong06_정천훈	18	2007-12-02	08:52:00	144	80	5	532	7732	-10.4776	-14.6009	3	36	0	1	0
gosong06_정천훈	19	2007-12-02	18:38:00	173	104	5	1118	8318	17.4191	9.02659	586	29	24	1	1
gosong06_정천훈	20	2007-12-02	18:41:00	151	100	5	1121	8321	-4.58654	5.02469	3	-22	-4	1	1
Result	nx	reading.date	reading.time	sbp	dbp	day	minutes	time	res.sbp	res.dbp	dtime	dsbp	ddbp	sbp.bi	dbp.bi
gosong07_이재필	1	2007-10-25	14:12:00	140	84	0	852	852	15.6138	6.93899	NA	NA	NA	1	0
gosong07_이재필	2	2007-10-25	22:27:00	124	80	0	1347	1347	-0.741066	2.69571	495	-16	-4	0	0
gosong07_이재필	3	2007-10-25	22:30:00	131	79	0	1350	1350	6.25678	1.69423	3	7	-1	0	0
gosong07_이재필	4	2007-10-26	06:12:00	119	78	1	372	1812	-6.07445	0.467166	462	-12	-1	0	0
gosong07_이재필	5	2007-10-26	06:13:00	119	78	1	373	1813	-6.07517	0.466674	1	0	0	0	0
gosong07_이재필	6	2007-10-26	22:51:00	124	76	1	1371	2811	-1.79069	-2.02383	998	5	-2	0	0
gosong07_이재필	7	2007-10-26	22:53:00	123	73	1	1373	2813	-2.79213	-5.02481	2	-1	-3	0	0
gosong07_이재필	8	2007-10-27	07:33:00	120	72	2	453	3333	-6.16495	-6.28038	520	-3	-1	0	0
gosong07_이재필	9	2007-10-27	07:35:00	121	75	2	455	3335	-5.16638	-3.28137	2	1	3	0	0
gosong07_이재필	10	2007-10-28	06:13:00	116	75	3	373	4693	-11.14	-3.94881	1358	-5	0	0	0
gosong07_이재필	11	2007-10-28	06:15:00	121	72	3	375	4695	-6.14144	-6.94979	2	5	-3	0	0
gosong07_이재필	12	2007-10-28	21:14:00	146	88	3	1274	5594	18.214	8.60836	899	25	16	1	1
gosong07_이재필	13	2007-10-28	21:17:00	148	89	3	1277	5597	20.2119	9.60689	3	2	1	1	1
gosong07_이재필	14	2007-10-28	21:51:00	124	80	3	1311	5631	-3.81252	0.59018	34	-24	-9	0	0
gosong07_이재필	15	2007-10-28	21:52:00	122	75	3	1312	5632	-5.81323	-4.41031	1	-2	-5	0	0
gosong07_이재필	16	2007-10-29	07:14:00	136	81	4	434	6194	7.78383	1.31347	562	14	6	1	0
gosong07_이재필	17	2007-10-29	07:16:00	112	74	4	436	6196	-16.2176	-5.68751	2	-24	-7	0	0
gosong07_이재필	18	2007-10-29	23:25:00	137	84	4	1405	7165	8.08767	3.83624	969	25	10	1	0
gosong07_이재필	19	2007-10-29	23:26:00	130	84	4	1406	7166	1.08695	3.83575	1	-7	0	0	0
gosong07_이재필	20	2007-10-30	09:01:00	124	78	5	541	7741	-5.3253	-2.44686	575	-6	-6	0	0
Result	nx	reading.date	reading.time	sbp	dbp	day	minutes	time	res.sbp	res.dbp	dtime	dsbp	ddbp	sbp.bi	dbp.bi
gosong08_박희수	1	2007-09-19	14:16:00	140	87	0	856	856	13.9403	8.31074	NA	NA	NA	1	1
gosong08_박희수	2	2007-09-20	06:04:00	120	80	1	364	1804	-6.70706	0.784233	948	-20	-7	0	0
gosong08_박희수	3	2007-09-20	08:20:00	126	81	1	500	1940	-0.799935	1.7087	136	6	1	0	0
gosong08_박희수	4	2007-09-20	19:25:00	130	80	1	1165	2605	2.74593	0.339371	665	4	-1	0	0
gosong08_박희수	5	2007-09-20	21:40:00	125	77	1	1300	2740	-2.34626	-2.73561	135	-5	-3	0	0
gosong08_박희수	6	2007-09-21	06:28:00	115	71	2	388	3268	-12.7068	-9.02885	528	-10	-6	0	0
gosong08_박희수	7	2007-09-21	08:33:00	119	64	2	513	3393	-8.79221	-16.0983	125	4	-7	0	0
gosong08_박희수	8	2007-09-21	17:00:00	140	83	2	1020	3900	11.8616	2.62015	507	21	19	1	0
gosong08_박희수	9	2007-09-21	19:37:00	125	80	2	1177	4057	-3.24566	-0.467045	157	-15	-3	0	0
gosong08_박희수	10	2007-09-21	21:51:00	119	79	2	1311	4191	-9.33717	-1.54147	134	-6	-1	0	0
gosong08_박희수	11	2007-09-22	06:38:00	118	81	3	398	4718	-10.6971	0.165846	527	-1	2	0	0
gosong08_박희수	12	2007-09-22	08:58:00	137	94	3	538	4858	8.20733	13.0881	140	19	13	1	1
gosong08_박희수	13	2007-09-22	19:16:00	146	92	3	1156	5476	16.7853	10.7449	618	9	-2	1	1
gosong08_박희수	14	2007-09-22	22:36:00	120	77	3	1356	5676	-9.35129	-4.36621	200	-26	-15	0	0
gosong08_박희수	15	2007-09-23	06:19:00	121	80	4	379	6139	-8.66748	-1.62335	463	1	3	0	0
gosong08_박희수	16	2007-09-23	08:47:00	135	84	4	527	6287	5.23145	2.29445	148	14	4	1	0
gosong08_박희수	17	2007-09-23	19:49:00	142	88	4	1189	6949	11.7794	5.92679	662	7	4	1	1
gosong08_박희수	18	2007-09-23	23:50:00	141	80	4	1430	7190	10.6148	-2.20706	241	-1	-8	1	0
gosong08_박희수	19	2007-09-24	06:29:00	116	73	5	389	7589	-14.6577	-9.42866	399	-25	-7	0	0
gosong08_박희수	20	2007-09-24	20:43:00	135	88	5	1243	8443	3.75909	5.09704	854	19	15	1	1
gosong08_박희수	21	2007-09-24	23:01:00	137	78	5	1381	8581	5.66485	-4.9796	138	2	-10	1	0
gosong08_박희수	22	2007-09-25	06:29:00	118	75	6	389	9029	-13.6411	-8.22841	448	-19	-3	0	0
gosong08_박희수	23	2007-09-25	20:23:00	164	92	6	1223	9863	31.7894	8.3084	834	46	17	1	1
gosong08_박희수	24	2007-09-25	23:17:00	133	88	6	1397	10037	0.670526	4.21176	174	-31	-4	0	1
gosong08_박희수	25	2007-09-26	06:32:00	114	79	7	392	10472	-18.6265	-5.02983	435	-19	-9	0	0
gosong08_박희수	26	2007-09-26	09:28:00	147	85	7	568	10648	14.2533	0.872424	176	33	6	1	1
gosong08_박희수	27	2007-09-26	18:37:00	129	84	7	1117	11197	-4.12165	-0.432482	549	-18	-1	0	0
gosong08_박희수	28	2007-09-26	21:17:00	135	89	7	1277	11357	1.76908	4.47866	160	6	5	1	1
gosong08_박희수	29	2007-09-27	07:07:00	124	77	8	427	11947	-9.63384	-7.84902	590	-11	-12	0	0
gosong08_박희수	30	2007-09-27	09:43:00	128	90	8	583	12103	-5.74037	5.06434	156	4	13	0	1
Result	nx	reading.date	reading.time	sbp	dbp	day	minutes	time	res.sbp	res.dbp	dtime	dsbp	ddbp	sbp.bi	dbp.bi
gosong09_강영화	1	2071-11-27	18:17:00	124	96	0	1097	1097	-7.59866	-6.97412	NA	NA	NA	0	1
gosong09_강영화	2	2071-11-27	18:20:00	135	95	0	1100	1100	3.39656	-7.97232	3	11	-1	1	1
gosong09_강영화	3	2071-11-28	08:21:00	128	112	1	501	1941	-4.94283	9.53197	841	-7	17	0	1
gosong09_강영화	4	2071-11-28	17:48:00	137	122	1	1068	2508	3.15415	19.872	567	9	10	1	1
gosong09_강영화	5	2071-11-28	18:03:00	145	96	1	1083	2523	11.1303	-6.11904	15	8	-26	1	1
gosong09_강영화	6	2071-11-28	19:06:00	110	81	1	1146	2586	-23.9701	-21.0813	63	-35	-15	0	0
gosong09_강영화	7	2071-11-28	19:17:00	136	103	1	1157	2597	2.01241	0.925333	11	26	22	1	1
gosong09_강영화	8	2071-11-29	05:46:00	142	115	2	346	3226	7.01065	13.3025	629	6	12	1	1
gosong09_강영화	9	2071-11-29	20:13:00	145	105	2	1213	4093	8.62985	3.82239	867	3	-10	1	1
gosong09_강영화	10	2071-11-30	03:39:00	144	94	3	219	4539	6.91954	-6.91017	446	-1	-11	1	1
gosong09_강영화	11	2071-11-30	03:44:00	144	111	3	224	4544	6.91158	10.0928	5	0	17	1	1
gosong09_강영화	12	2071-11-30	18:37:00	139	96	3	1117	5437	0.489371	-4.3717	893	-5	-15	1	1
gosong09_강영화	13	2071-12-01	07:18:00	138	118	4	438	6198	-1.72261	18.0846	761	-1	22	1	1
gosong09_강영화	14	2071-12-01	19:28:00	142	79	4	1168	6928	1.11478	-20.4776	730	4	-39	1	0
gosong09_강영화	15	2071-12-01	19:30:00	126	84	4	1170	6930	-14.8884	-15.4764	2	-16	5	0	0
gosong09_강영화	16	2071-12-02	05:16:00	149	101	5	316	7516	7.17832	1.87495	586	23	17	1	1
gosong09_강영화	17	2071-12-02	05:18:00	137	111	5	318	7518	-4.82487	11.8761	2	-12	10	1	1
Result	nx	reading.date	reading.time	sbp	dbp	day	minutes	time	res.sbp	res.dbp	dtime	dsbp	ddbp	sbp.bi	dbp.bi
gosong10_맹주경	1	2007-09-28	14:43:00	135	92	0	883	883	14.9841	7.239	NA	NA	NA	1	1
gosong10_맹주경	2	2007-09-29	07:37:00	123	83	1	457	1897	2.65209	-0.939687	1014	-12	-9	0	0
gosong10_맹주경	3	2007-09-29	08:51:00	113	82	1	531	1971	-7.37214	-1.87975	74	-10	-1	0	0
gosong10_맹주경	4	2007-09-29	08:52:00	120	85	1	532	1972	-0.372472	1.12106	1	7	3	0	1
gosong10_맹주경	5	2007-09-29	20:40:00	123	86	1	1240	2680	2.39569	2.69453	708	3	1	0	1
gosong10_맹주경	6	2007-09-30	08:04:00	111	85	2	484	3364	-9.82829	2.24855	684	-12	-1	0	1
gosong10_맹주경	7	2007-09-30	08:06:00	115	81	2	486	3366	-5.82895	-1.74983	2	4	-4	0	0
gosong10_맹주경	8	2007-09-30	09:23:00	135	86	2	563	3443	14.1458	3.31254	77	20	5	1	1
gosong10_맹주경	9	2007-09-30	09:25:00	117	80	2	565	3445	-3.85481	-2.68584	2	-18	-6	0	0
gosong10_맹주경	10	2007-09-30	15:04:00	128	88	2	904	3784	7.03418	5.58874	339	11	8	0	1
gosong10_맹주경	11	2007-09-30	15:06:00	120	82	2	906	3786	-0.966477	-0.409639	2	-8	-6	0	0
gosong10_맹주경	12	2007-09-30	20:05:00	123	84	2	1205	4085	1.93561	1.83254	299	3	2	0	0
gosong10_맹주경	13	2007-10-01	07:57:00	127	80	3	477	4797	5.70246	-1.59075	712	4	-4	0	0
gosong10_맹주경	14	2007-10-01	09:19:00	124	84	3	559	4879	2.67561	2.47567	82	-3	4	0	0
gosong10_맹주경	15	2007-10-01	18:48:00	106	66	3	1128	5448	-15.5107	-15.0635	569	-18	-18	0	0
gosong10_맹주경	16	2007-10-01	21:16:00	104	68	3	1276	5596	-17.5592	-12.9436	148	-2	2	0	0
gosong10_맹주경	17	2007-10-01	21:17:00	106	72	3	1277	5597	-15.5595	-8.94277	1	2	4	0	0
gosong10_맹주경	18	2007-10-02	07:15:00	123	86	4	435	6195	1.24468	5.5416	598	17	14	0	1
gosong10_맹주경	19	2007-10-02	09:33:00	125	83	4	573	6333	3.19949	2.65337	138	2	-3	0	0
gosong10_맹주경	20	2007-10-02	13:47:00	112	77	4	827	6587	-9.88368	-3.14089	254	-13	-6	0	0
gosong10_맹주경	21	2007-10-02	20:55:00	136	82	4	1255	7015	13.9762	2.20578	428	24	5	1	0
gosong10_맹주경	22	2007-10-03	08:08:00	123	81	5	488	7688	0.755788	1.75089	673	-13	-1	0	0
gosong10_맹주경	23	2007-10-03	08:10:00	127	78	5	490	7690	4.75513	-1.24749	2	4	-3	0	0
gosong10_맹주경	24	2007-10-04	08:23:00	134	90	6	503	9143	11.2793	11.9294	1453	7	12	0	1
Result	nx	reading.date	reading.time	sbp	dbp	day	minutes	time	res.sbp	res.dbp	dtime	dsbp	ddbp	sbp.bi	dbp.bi
gosong11_김지태	1	2007-10-05	09:26:00	136	69	0	566	566	13.0203	-2.08815	NA	NA	NA	1	0
gosong11_김지태	2	2007-10-05	19:12:00	120	68	0	1152	1152	-3.85115	-2.96334	586	-16	-1	0	0
gosong11_김지태	3	2007-10-06	07:00:00	118	77	1	420	1860	-6.90408	6.18746	708	-2	9	0	0
gosong11_김지태	4	2007-10-06	18:05:00	129	76	1	1085	2525	3.10694	5.32911	665	11	-1	0	0
gosong11_김지태	5	2007-10-07	06:47:00	117	65	2	407	3287	-10.0263	-5.50859	762	-12	-11	0	0
gosong11_김지태	6	2007-10-07	20:03:00	128	66	2	1203	4083	-0.210094	-4.33905	796	11	1	0	0
gosong11_김지태	7	2007-10-08	07:09:00	116	72	3	429	4749	-13.2006	1.80281	666	-12	6	0	0
gosong11_김지태	8	2007-10-08	19:57:00	142	76	3	1197	5517	11.6573	5.96639	768	26	4	1	0
gosong11_김지태	9	2007-10-08	19:58:00	145	70	3	1198	5518	14.6558	-0.0334009	1	3	-6	1	0
gosong11_김지태	10	2007-10-09	07:15:00	117	64	4	435	6195	-14.351	-5.8892	677	-28	-6	0	0
gosong11_김지태	11	2007-10-09	19:32:00	147	73	4	1172	6932	14.5529	3.26777	737	30	9	1	0
gosong11_김지태	12	2007-10-09	19:34:00	124	68	4	1174	6934	-8.45006	-1.7318	2	-23	-5	0	0
Result	nx	reading.date	reading.time	sbp	dbp	day	minutes	time	res.sbp	res.dbp	dtime	dsbp	ddbp	sbp.bi	dbp.bi
gosong12_홍옥례	1	2007-11-01	14:03:00	174	103	0	843	843	27.6602	13.2669	NA	NA	NA	1	1
gosong12_홍옥례	2	2007-11-01	21:06:00	140	84	0	1266	1266	-6.61235	-5.77478	423	-34	-19	1	0
gosong12_홍옥례	3	2007-11-02	07:01:00	131	87	1	421	1861	-15.9957	-2.83337	595	-9	3	0	1
gosong12_홍옥례	4	2007-11-02	07:05:00	143	91	1	425	1865	-3.99824	1.16623	4	12	4	1	1
gosong12_홍옥례	5	2007-11-02	23:31:00	155	92	1	1411	2851	7.36656	2.06914	986	12	1	1	1
gosong12_홍옥례	6	2007-11-03	06:51:00	147	90	2	411	3291	-0.916898	0.0258111	440	-8	-2	1	1
gosong12_홍옥례	7	2007-11-03	06:57:00	140	91	2	417	3297	-7.92076	1.02522	6	-7	1	1	1
gosong12_홍옥례	8	2007-11-03	20:02:00	146	83	2	1202	4082	-2.42648	-7.05208	785	6	-8	1	0
gosong12_홍옥례	9	2007-11-03	20:08:00	147	87	2	1208	4088	-1.43034	-3.05267	6	1	4	1	1
gosong12_홍옥례	10	2007-11-04	06:50:00	154	93	3	410	4730	5.15607	2.88411	642	7	6	1	1
gosong12_홍옥례	11	2007-11-04	06:56:00	145	80	3	416	4736	-3.8478	-10.1165	6	-9	-13	1	0
gosong12_홍옥례	12	2007-11-04	21:07:00	137	91	3	1267	5587	-12.396	0.799717	851	-8	11	1	1
gosong12_홍옥례	13	2007-11-04	21:11:00	142	83	3	1271	5591	-7.39861	-7.20068	4	5	-8	1	0
gosong12_홍옥례	14	2007-11-05	07:17:00	143	88	4	437	6197	-6.78901	-2.26035	606	1	5	1	1
gosong12_홍옥례	15	2007-11-05	07:20:00	168	96	4	440	6200	18.2091	5.73935	3	25	8	1	1
gosong12_홍옥례	16	2007-11-05	21:15:00	157	96	4	1275	7035	6.67113	5.65713	835	-11	0	1	1
gosong12_홍옥례	17	2007-11-05	21:18:00	155	96	4	1278	7038	4.6692	5.65683	3	-2	0	1	1
Result	nx	reading.date	reading.time	sbp	dbp	day	minutes	time	res.sbp	res.dbp	dtime	dsbp	ddbp	sbp.bi	dbp.bi
gosong13_김복순	1	2007-09-19	14:18:00	113	70	0	858	858	6.79381	0.284186	NA	NA	NA	0	0
gosong13_김복순	2	2007-09-20	04:11:00	102	68	1	251	1691	-4.45514	-2.04973	833	-11	-2	0	0
gosong13_김복순	3	2007-09-20	12:32:00	96	61	1	752	2192	-10.6049	-9.25057	501	-6	-7	0	0
gosong13_김복순	4	2007-09-20	20:13:00	102	68	1	1213	2653	-4.74263	-2.43537	461	6	7	0	0
gosong13_김복순	5	2007-09-21	06:09:00	111	77	2	369	3249	4.07925	6.32572	596	9	9	0	0
gosong13_김복순	6	2007-09-21	09:28:00	97	62	2	568	3448	-9.98022	-8.75406	199	-14	-15	0	0
gosong13_김복순	7	2007-09-21	20:15:00	110	76	2	1215	4095	2.82642	4.98658	647	13	14	0	0
gosong13_김복순	8	2007-09-22	00:54:00	109	75	3	54	4374	1.74304	3.87474	279	-1	-1	0	0
gosong13_김복순	9	2007-09-22	06:38:00	122	80	3	398	4718	14.6402	8.73685	344	13	5	0	0
gosong13_김복순	10	2007-09-22	21:04:00	107	75	3	1264	5584	-0.618566	3.3897	866	-15	-5	0	0
gosong13_김복순	11	2007-09-22	22:39:00	114	72	3	1359	5679	6.35304	0.351614	95	7	-3	0	0
gosong13_김복순	12	2007-09-23	06:20:00	109	75	4	380	6140	1.21527	3.16681	461	-5	3	0	0
gosong13_김복순	13	2007-09-23	19:50:00	125	79	4	1190	6950	16.9732	6.84211	810	16	4	0	0
gosong13_김복순	14	2007-09-24	10:51:00	109	70	5	651	7851	0.703936	-2.51907	901	-16	-9	0	0
gosong13_김복순	15	2007-09-24	19:29:00	85	65	5	1169	8369	-23.4509	-7.72671	518	-24	-5	0	0
gosong13_김복순	16	2007-09-25	00:04:00	96	64	6	4	8644	-12.5331	-8.83695	275	11	-1	0	0
gosong13_김복순	17	2007-09-26	07:37:00	109	80	7	457	10537	-0.09878	6.40421	1893	13	16	0	0
gosong13_김복순	18	2007-09-26	09:31:00	126	76	7	571	10651	16.8672	2.35851	114	17	-4	0	0
gosong13_김복순	19	2007-09-26	18:24:00	102	67	7	1104	11184	-7.29214	-6.85515	533	-24	-9	0	0
gosong13_김복순	20	2007-09-26	21:17:00	113	76	7	1277	11357	3.65616	2.0755	173	11	9	0	0
gosong13_김복순	21	2007-09-27	06:29:00	120	80	8	389	11909	10.4912	5.85422	552	7	4	0	0
gosong13_김복순	22	2007-09-27	09:42:00	97	68	8	582	12102	-12.5665	-6.22315	193	-23	-12	0	0
Result	nx	reading.date	reading.time	sbp	dbp	day	minutes	time	res.sbp	res.dbp	dtime	dsbp	ddbp	sbp.bi	dbp.bi
gosong14_정운소	1	2007-10-11	11:59:00	132	85	0	719	719	6.53367	4.85384	NA	NA	NA	0	1
gosong14_정운소	2	2007-10-11	23:00:00	117	75	0	1380	1380	-9.29105	-5.80213	661	-15	-10	0	0
gosong14_정운소	3	2007-10-11	23:02:00	123	72	0	1382	1382	-3.29355	-8.80412	2	6	-3	0	0
gosong14_정운소	4	2007-10-12	05:31:00	134	83	1	331	1771	7.2211	1.80984	389	11	11	0	0
gosong14_정운소	5	2007-10-12	05:33:00	134	84	1	333	1773	7.2186	2.80786	2	0	1	0	0
gosong14_정운소	6	2007-10-12	22:58:00	132	85	1	1378	2818	3.91476	2.77081	1045	-2	1	0	1
gosong14_정운소	7	2007-10-12	23:00:00	122	82	1	1380	2820	-6.08773	-0.231178	2	-10	-3	0	0
gosong14_정운소	8	2007-10-13	06:54:00	136	88	2	414	3294	7.32086	5.29843	474	14	6	1	1
gosong14_정운소	9	2007-10-13	06:55:00	119	85	2	415	3295	-9.68039	2.29744	1	-17	-3	0	1
gosong14_정운소	10	2007-10-13	23:19:00	127	76	2	1399	4279	-2.90812	-7.67908	984	8	-9	0	0
gosong14_정운소	11	2007-10-13	23:21:00	119	78	2	1401	4281	-10.9106	-5.68106	2	-8	2	0	0
gosong14_정운소	12	2007-10-14	06:39:00	134	86	3	399	4719	3.5429	1.88427	438	15	8	0	1
gosong14_정운소	13	2007-10-14	06:41:00	130	91	3	401	4721	-0.459598	6.88228	2	-4	5	0	1
gosong14_정운소	14	2007-10-14	22:55:00	130	86	3	1375	5695	-1.67485	0.915692	974	0	-5	0	1
gosong14_정운소	15	2007-10-14	22:57:00	127	82	3	1377	5697	-4.67735	-3.08629	2	-3	-4	0	0
gosong14_정운소	16	2007-10-15	07:00:00	136	88	4	420	6180	3.72002	2.43438	483	9	6	1	1
gosong14_정운소	17	2007-10-15	07:02:00	144	90	4	422	6182	11.7175	4.4324	2	8	2	1	1
gosong14_정운소	18	2007-10-15	23:32:00	127	85	4	1412	7172	-6.5177	-1.55007	990	-17	-5	0	1
gosong14_정운소	19	2007-10-15	23:34:00	133	86	4	1414	7174	-0.520192	-0.552058	2	6	1	0	1
gosong14_정운소	20	2007-10-16	07:05:00	138	83	5	425	7625	3.9171	-3.99963	451	5	-3	1	0
gosong14_정운소	21	2007-10-16	07:07:00	135	88	5	427	7627	0.914602	0.998388	2	-3	5	1	1
Result	nx	reading.date	reading.time	sbp	dbp	day	minutes	time	res.sbp	res.dbp	dtime	dsbp	ddbp	sbp.bi	dbp.bi
gosong15_박학수	1	2007-12-05	09:15:00	150	72	0	555	555	3.65105	-9.59204	NA	NA	NA	1	0
gosong15_박학수	2	2007-12-05	21:04:00	140	83	0	1264	1264	-4.17914	2.48349	709	-10	11	1	0
gosong15_박학수	3	2007-12-05	21:06:00	148	80	0	1266	1266	3.82698	-0.513474	2	8	-3	1	0
gosong15_박학수	4	2007-12-06	07:38:00	138	76	1	458	1898	-4.23886	-3.55475	632	-10	-4	1	0
gosong15_박학수	5	2007-12-06	07:40:00	123	80	1	460	1900	-19.2327	0.448287	2	-15	4	0	0
gosong15_박학수	6	2007-12-06	07:42:00	128	83	1	462	1902	-14.2266	3.45132	2	5	3	0	0
gosong15_박학수	7	2007-12-06	07:45:00	124	79	1	465	1905	-18.2174	-0.544128	3	-4	-4	0	0
gosong15_박학수	8	2007-12-06	22:02:00	159	81	1	1322	2762	19.4053	2.75592	857	35	2	1	0
gosong15_박학수	9	2007-12-06	22:05:00	148	79	1	1325	2765	8.4145	0.760468	3	-11	-2	1	0
gosong15_박학수	10	2007-12-06	22:09:00	155	80	1	1329	2769	15.4267	1.76654	4	7	1	1	0
gosong15_박학수	11	2007-12-06	22:11:00	148	81	1	1331	2771	8.43286	2.76957	2	-7	1	1	0
gosong15_박학수	12	2007-12-07	07:24:00	128	77	2	444	3324	-9.87475	-0.391544	553	-20	-4	0	0
gosong15_박학수	13	2007-12-07	07:26:00	128	72	2	446	3326	-9.86862	-5.38851	2	0	-5	0	0
gosong15_박학수	14	2007-12-07	22:30:00	148	76	2	1350	4230	12.898	-0.017167	904	20	4	1	0
gosong15_박학수	15	2007-12-07	22:33:00	148	81	2	1353	4233	12.9071	4.98738	3	0	5	1	0
gosong15_박학수	16	2007-12-07	22:35:00	134	80	2	1355	4235	-1.08673	3.99042	2	-14	-1	0	0
gosong15_박학수	17	2007-12-08	07:27:00	132	75	3	447	4767	-1.45861	-0.202553	532	-2	-5	0	0
gosong15_박학수	18	2007-12-08	07:29:00	138	76	3	449	4769	4.54751	0.800481	2	6	1	1	0
gosong15_박학수	19	2007-12-08	21:47:00	132	72	3	1307	5627	1.17332	-1.89796	858	-6	-4	0	0
gosong15_박학수	20	2007-12-08	21:49:00	136	71	3	1309	5629	5.17945	-2.89492	2	4	-1	1	0
gosong15_박학수	21	2007-12-08	21:52:00	143	75	3	1312	5632	12.1886	1.10963	3	7	4	1	0
gosong15_박학수	22	2007-12-08	21:54:00	127	80	3	1314	5634	-3.80525	6.11266	2	-16	5	0	0
gosong15_박학수	23	2007-12-08	21:57:00	143	79	3	1317	5637	12.2039	5.11721	3	16	-1	1	0
gosong15_박학수	24	2007-12-09	06:48:00	132	76	4	408	6168	2.82899	2.92273	531	-11	-3	0	0
gosong15_박학수	25	2007-12-09	06:50:00	131	78	4	410	6170	1.83511	4.92576	2	-1	2	0	0
gosong15_박학수	26	2007-12-09	21:18:00	124	66	4	1278	7038	-2.50847	-5.75751	868	-7	-12	0	0
gosong15_박학수	27	2007-12-09	21:21:00	119	70	4	1281	7041	-7.49929	-1.75296	3	-5	4	0	0
gosong15_박학수	28	2007-12-09	21:24:00	120	64	4	1284	7044	-6.49011	-7.74841	3	1	-6	0	0
gosong15_박학수	29	2007-12-09	21:26:00	118	61	4	1286	7046	-8.48399	-10.7454	2	-2	-3	0	0
gosong15_박학수	30	2007-12-09	21:27:00	112	70	4	1287	7047	-14.4809	-1.74386	1	-6	9	0	0
gosong15_박학수	31	2007-12-10	07:29:00	124	78	5	449	7649	-0.638576	7.16936	602	12	8	0	0
gosong15_박학수	32	2007-12-10	07:32:00	126	72	5	452	7652	1.37061	1.17391	3	2	-6	0	0
Result	nx	reading.date	reading.time	sbp	dbp	day	minutes	time	res.sbp	res.dbp	dtime	dsbp	ddbp	sbp.bi	dbp.bi
gosong16_정윤희	1	2007-11-28	13:00:00	104	72	0	780	780	-1.47135	-0.0293322	NA	NA	NA	0	0
gosong16_정윤희	2	2007-11-28	22:17:00	100	72	0	1337	1337	-7.02351	-0.829645	557	-4	0	0	0
gosong16_정윤희	3	2007-11-28	22:19:00	106	69	0	1339	1339	-1.02908	-3.83252	2	6	-3	0	0
gosong16_정윤희	4	2007-11-29	07:03:00	104	78	1	423	1863	-4.48928	4.41458	524	-2	9	0	0
gosong16_정윤희	5	2007-11-29	07:05:00	118	79	1	425	1865	9.50515	5.41171	2	14	1	0	0
gosong16_정윤희	6	2007-11-29	21:39:00	102	66	1	1299	2739	-8.93036	-8.84408	874	-16	-13	0	0
gosong16_정윤희	7	2007-11-29	21:41:00	93	62	1	1301	2741	-17.9359	-12.8469	2	-9	-4	0	0
gosong16_정윤희	8	2007-11-30	07:17:00	128	84	2	437	3317	15.459	8.32544	576	35	22	0	0
gosong16_정윤희	9	2007-11-30	07:19:00	125	82	2	439	3319	12.4534	6.32256	2	-3	-2	0	0
gosong16_정윤희	10	2007-12-01	07:09:00	121	82	3	429	4749	4.46851	4.2679	1430	-4	0	0	0
gosong16_정윤희	11	2007-12-01	07:10:00	132	86	3	430	4750	15.4657	8.26647	1	11	4	0	1
gosong16_정윤희	12	2007-12-01	22:37:00	112	72	3	1357	5677	-7.11749	-7.06547	927	-20	-14	0	0
gosong16_정윤희	13	2007-12-01	22:39:00	118	73	3	1359	5679	-1.12306	-6.06835	2	6	1	0	0
gosong16_정윤희	14	2007-12-02	07:22:00	134	88	4	442	6202	13.4195	8.18019	523	16	15	0	1
gosong16_정윤희	15	2007-12-02	07:24:00	119	79	4	444	6204	-1.58604	-0.822681	2	-15	-9	0	0
gosong16_정윤희	16	2007-12-02	21:39:00	107	77	4	1299	7059	-15.9686	-4.05117	855	-12	-2	0	0
gosong16_정윤희	17	2007-12-02	21:40:00	112	76	4	1300	7060	-10.9714	-5.0526	1	5	-1	0	0
gosong16_정윤희	18	2007-12-03	07:10:00	130	84	5	430	7630	5.44022	2.1284	570	18	8	0	0
gosong16_정윤희	19	2007-12-03	07:12:00	126	84	5	432	7632	1.43465	2.12553	2	-4	0	0	0
Result	nx	reading.date	reading.time	sbp	dbp	day	minutes	time	res.sbp	res.dbp	dtime	dsbp	ddbp	sbp.bi	dbp.bi
gosong17_박정숙	1	2007-10-05	09:28:00	192	78	0	568	568	26.7536	2.02272	NA	NA	NA	1	0
gosong17_박정숙	2	2007-10-05	19:54:00	169	84	0	1194	1194	4.11118	5.27942	626	-23	6	1	0
gosong17_박정숙	3	2007-10-06	07:27:00	144	87	1	447	1887	-20.493	5.2425	693	-25	3	1	1
gosong17_박정숙	4	2007-10-06	19:49:00	145	77	1	1189	2629	-19.0691	-8.00915	742	1	-10	1	0
gosong17_박정숙	5	2007-10-07	18:40:00	155	81	2	1120	4000	-8.28593	-10.0173	1371	10	4	1	0
gosong17_박정숙	6	2007-10-08	21:42:00	168	98	3	1302	5622	5.64062	-0.125317	1622	13	17	1	1
gosong17_박정숙	7	2007-10-09	04:56:00	172	95	4	296	6056	9.88853	-5.02723	434	4	-3	1	1
gosong17_박정숙	8	2007-10-09	21:26:00	163	115	4	1286	7046	1.45406	10.6343	990	-9	20	1	1
Result	nx	reading.date	reading.time	sbp	dbp	day	minutes	time	res.sbp	res.dbp	dtime	dsbp	ddbp	sbp.bi	dbp.bi
gosong18_박광국	1	2007-09-13	16:47:00	152	88	0	1007	1007	5.4431	-14.2593	NA	NA	NA	1	1
gosong18_박광국	2	2007-09-13	17:17:00	128	73	0	1037	1037	-18.7022	-29.3009	30	-24	-15	0	0
gosong18_박광국	3	2007-09-13	19:43:00	147	95	0	1183	1183	-0.40912	-7.50341	146	19	22	1	1
gosong18_박광국	4	2007-09-13	19:47:00	160	150	0	1187	1187	12.5715	47.491	4	13	55	1	1
gosong18_박광국	5	2007-09-14	06:25:00	165	100	1	385	1825	14.4822	-3.39368	638	5	-50	1	1
gosong18_박광국	6	2007-09-14	10:06:00	154	120	1	606	2046	2.41208	16.2999	221	-11	20	1	1
gosong18_박광국	7	2007-09-14	19:33:00	105	84	1	1173	2613	-49.3334	-20.4864	567	-49	-36	0	0
gosong18_박광국	8	2007-09-15	08:51:00	172	88	2	531	3411	13.8025	-17.593	798	67	4	1	1
gosong18_박광국	9	2007-09-15	08:53:00	180	96	2	533	3413	21.7928	-9.59578	2	8	8	1	1
gosong18_박광국	10	2007-09-15	19:57:00	141	108	2	1197	4077	-20.4224	1.48344	664	-39	12	1	1
gosong18_박광국	11	2007-09-16	06:12:00	168	124	3	372	4692	3.59969	16.6306	615	27	16	1	1
gosong18_박광국	12	2007-09-16	10:39:00	176	104	3	639	4959	10.3068	-3.73964	267	8	-20	1	1
gosong18_박광국	13	2007-09-16	14:23:00	150	91	3	863	5183	-16.7778	-17.0503	224	-26	-13	1	1
gosong18_박광국	14	2007-09-16	21:31:00	239	212	3	1291	5611	70.1497	103.356	428	89	121	1	1
gosong18_박광국	15	2007-09-17	06:44:00	133	110	4	404	6164	-38.528	0.58937	553	-106	-102	0	1
gosong18_박광국	16	2007-09-17	09:35:00	171	94	4	575	6335	-1.356	-15.6478	171	38	-16	1	1
gosong18_박광국	17	2007-09-17	15:10:00	172	96	4	910	6670	-1.97813	-14.1123	335	1	2	1	1
gosong18_박광국	18	2007-09-17	17:04:00	164	112	4	1024	6784	-10.5301	1.72961	114	-8	16	1	1
gosong18_박광국	19	2007-09-17	17:07:00	176	108	4	1027	6787	1.45534	-2.27455	3	12	-4	1	1
gosong18_박광국	20	2007-09-17	20:03:00	192	96	4	1203	6963	16.6031	-14.5186	176	16	-12	1	1
gosong18_박광국	21	2007-09-18	07:17:00	155	120	5	437	7637	-23.6605	8.54674	674	-37	24	1	1
gosong18_박광국	22	2007-09-18	10:28:00	195	104	5	628	7828	15.4146	-7.71812	191	40	-16	1	1
gosong18_박광국	23	2007-09-18	13:03:00	174	93	5	783	7983	-6.33591	-18.9331	155	-21	-11	1	1
Result	nx	reading.date	reading.time	sbp	dbp	day	minutes	time	res.sbp	res.dbp	dtime	dsbp	ddbp	sbp.bi	dbp.bi
gosong19_이계승	1	2007-10-11	11:51:00	120	74	0	711	711	10.2171	-1.34564	NA	NA	NA	0	0
gosong19_이계승	2	2007-10-11	11:55:00	117	75	0	715	715	7.21784	-0.346034	4	-3	1	0	0
gosong19_이계승	3	2007-10-11	11:58:00	111	77	0	718	718	1.21838	1.65367	3	-6	2	0	0
gosong19_이계승	4	2007-10-11	22:55:00	99	75	0	1375	1375	-10.6647	-0.411653	657	-12	-2	0	0
gosong19_이계승	5	2007-10-11	22:57:00	100	72	0	1377	1377	-9.66437	-3.41185	2	1	-3	0	0
gosong19_이계승	6	2007-10-11	22:59:00	111	72	0	1379	1379	1.33599	-3.41205	2	11	0	0	0
gosong19_이계승	7	2007-10-12	05:30:00	111	86	1	330	1770	1.40556	10.5491	391	0	14	0	1
gosong19_이계승	8	2007-10-12	05:32:00	108	72	1	332	1772	-1.59408	-3.45112	2	-3	-14	0	0
gosong19_이계승	9	2007-10-12	21:46:00	111	75	1	1306	2746	1.57922	-0.547961	974	3	3	0	0
gosong19_이계승	10	2007-10-12	21:48:00	108	76	1	1308	2748	-1.42042	0.451841	2	-3	1	0	0
gosong19_이계승	11	2007-10-13	05:47:00	116	83	2	347	3227	6.66481	7.40422	479	8	7	0	0
gosong19_이계승	12	2007-10-13	05:49:00	104	72	2	349	3229	-5.33484	-3.59598	2	-12	-11	0	0
gosong19_이계승	13	2007-10-13	23:34:00	104	70	2	1414	4294	-5.14534	-5.70187	1065	0	-2	0	0
gosong19_이계승	14	2007-10-13	23:35:00	104	71	2	1415	4295	-5.14516	-4.70197	1	0	1	0	0
gosong19_이계승	15	2007-10-14	07:27:00	117	82	3	447	4767	7.93882	6.25111	472	13	11	0	0
gosong19_이계승	16	2007-10-14	07:30:00	104	79	3	450	4770	-5.06064	3.25081	3	-13	-3	0	0
gosong19_이계승	17	2007-10-15	01:13:00	112	76	4	73	5833	3.1285	0.145123	1063	8	-3	0	0
gosong19_이계승	18	2007-10-15	01:15:00	108	76	4	75	5835	-0.871144	0.144924	2	-4	0	0	0
gosong19_이계승	19	2007-10-15	07:13:00	120	79	4	433	6193	11.1926	3.10933	358	12	3	0	0
gosong19_이계승	20	2007-10-15	07:15:00	116	81	4	435	6195	7.19291	5.10913	2	-4	2	0	0
gosong19_이계승	21	2007-10-16	00:44:00	92	64	5	44	7244	-16.6204	-11.9952	1049	-24	-17	0	0
gosong19_이계승	22	2007-10-16	00:46:00	93	61	5	46	7246	-15.6201	-14.9954	2	1	-3	0	0
gosong19_이계승	23	2007-10-16	14:19:00	117	82	5	859	8059	8.52458	5.92381	813	24	21	0	0
gosong19_이계승	24	2007-10-16	14:21:00	118	86	5	861	8061	9.52493	9.92361	2	1	4	0	1
Result	nx	reading.date	reading.time	sbp	dbp	day	minutes	time	res.sbp	res.dbp	dtime	dsbp	ddbp	sbp.bi	dbp.bi
gosong20_장두준	1	2007-10-05	09:27:00	120	72	0	567	567	-2.08243	-0.645214	NA	NA	NA	0	0
gosong20_장두준	2	2007-10-05	19:12:00	120	76	0	1152	1152	-2.75969	3.17873	585	0	4	0	0
gosong20_장두준	3	2007-10-06	07:00:00	133	75	1	420	1860	9.42065	1.96565	708	13	-1	0	0
gosong20_장두준	4	2007-10-06	13:35:00	123	72	1	815	2255	-1.03665	-1.15323	395	-10	-3	0	0
gosong20_장두준	5	2007-10-06	18:06:00	121	72	1	1086	2526	-3.35038	-1.23479	271	-2	0	0	0
gosong20_장두준	6	2007-10-07	06:47:00	129	78	2	407	3287	3.7686	4.53619	761	8	6	0	0
gosong20_장두준	7	2007-10-07	20:03:00	118	65	2	1203	4083	-8.15293	-8.70337	796	-11	-13	0	0
gosong20_장두준	8	2007-10-08	07:26:00	134	72	3	446	4766	7.05635	-1.90893	683	16	7	0	0
gosong20_장두준	9	2007-10-08	19:57:00	118	71	3	1197	5517	-9.81309	-3.13494	751	-16	-1	0	0
gosong20_장두준	10	2007-10-09	07:16:00	141	79	4	436	6196	12.4008	4.66071	679	23	8	1	0
gosong20_장두준	11	2007-10-09	19:32:00	124	77	4	1172	6932	-5.45125	2.4392	736	-17	-2	0	0
Result	nx	reading.date	reading.time	sbp	dbp	day	minutes	time	res.sbp	res.dbp	dtime	dsbp	ddbp	sbp.bi	dbp.bi
gosong21_김재식	1	2007-11-01	14:01:00	115	70	0	841	841	-8.16182	-7.89138	NA	NA	NA	0	0
gosong21_김재식	2	2007-11-02	14:47:00	117	79	1	887	2327	-8.40445	-1.87024	1486	2	9	0	0
gosong21_김재식	3	2007-11-02	19:10:00	119	74	1	1150	2590	-6.80136	-7.39746	263	2	-5	0	0
gosong21_김재식	4	2007-11-02	19:11:00	115	74	1	1151	2591	-10.8029	-7.39946	1	-4	0	0	0
gosong21_김재식	5	2007-11-03	06:33:00	144	96	2	393	3273	17.1679	13.2334	682	29	22	1	1
gosong21_김재식	6	2007-11-03	06:34:00	147	97	2	394	3274	20.1664	14.2314	1	3	1	1	1
gosong21_김재식	7	2007-11-03	21:36:00	117	80	2	1296	4176	-11.1949	-4.57678	902	-30	-17	0	0
gosong21_김재식	8	2007-11-03	21:37:00	121	80	2	1297	4177	-7.19642	-4.57879	1	4	0	0	0
gosong21_김재식	9	2007-11-04	06:07:00	142	95	3	367	4687	13.0339	9.39886	510	21	15	1	1
gosong21_김재식	10	2007-11-04	06:08:00	146	97	3	368	4688	17.0324	11.3969	1	4	2	1	1
gosong21_김재식	11	2007-11-05	00:29:00	131	85	4	29	5789	0.370788	-2.81023	1101	-15	-12	0	1
gosong21_김재식	12	2007-11-05	00:30:00	130	85	4	30	5790	-0.630721	-2.81224	1	-1	0	0	1
gosong21_김재식	13	2007-11-05	06:52:00	135	92	4	412	6172	3.79277	3.422	382	5	7	1	1
gosong21_김재식	14	2007-11-05	06:53:00	144	93	4	413	6173	12.7913	4.42	1	9	1	1	1
gosong21_김재식	15	2007-11-05	19:59:00	118	82	4	1199	6959	-14.3949	-8.15564	786	-26	-11	0	0
gosong21_김재식	16	2007-11-05	20:00:00	113	80	4	1200	6960	-19.3965	-10.1576	1	-5	-2	0	0
gosong21_김재식	17	2007-11-06	06:46:00	136	93	5	406	7606	2.62862	1.54738	646	23	13	1	1
Result	nx	reading.date	reading.time	sbp	dbp	day	minutes	time	res.sbp	res.dbp	dtime	dsbp	ddbp	sbp.bi	dbp.bi
gosong22_서봉길	1	2008-11-11	11:58:00	141	85	0	718	718	0.508198	0.0244187	NA	NA	NA	1	1
gosong22_서봉길	2	2008-11-11	22:11:00	144	84	0	1331	1331	6.33614	-1.20081	613	3	-1	1	0
gosong22_서봉길	3	2008-11-11	22:14:00	136	84	0	1334	1334	-1.65002	-1.20192	3	-8	0	1	0
gosong22_서봉길	4	2008-11-12	08:49:00	128	88	1	529	1969	-6.72058	2.56477	635	-8	4	0	1
gosong22_서봉길	5	2008-11-12	08:51:00	132	87	1	531	1971	-2.71136	1.56403	2	4	-1	0	1
gosong22_서봉길	6	2008-11-12	23:07:00	135	84	1	1387	2827	4.23762	-1.75049	856	3	-3	1	0
Result	nx	reading.date	reading.time	sbp	dbp	day	minutes	time	res.sbp	res.dbp	dtime	dsbp	ddbp	sbp.bi	dbp.bi
gosong23_차봉여	1	2007-11-01	14:02:00	164	97	0	842	842	14.0541	1.6764	NA	NA	NA	1	1
gosong23_차봉여	2	2007-11-01	22:15:00	134	90	0	1335	1335	-14.8996	-4.49625	493	-30	-7	0	1
gosong23_차봉여	3	2007-11-01	22:17:00	128	86	0	1337	1337	-20.8954	-8.49289	2	-6	-4	0	1
gosong23_차봉여	4	2007-11-02	06:57:00	154	97	1	417	1857	6.20821	3.37976	520	26	11	1	1
gosong23_차봉여	5	2007-11-02	06:59:00	139	96	1	419	1859	-8.78754	2.38312	2	-15	-1	1	1
gosong23_차봉여	6	2007-11-02	21:05:00	152	94	1	1265	2705	6.00788	1.80286	846	13	-2	1	1
gosong23_차봉여	7	2007-11-02	21:07:00	158	102	1	1267	2707	12.0121	9.80622	2	6	8	1	1
gosong23_차봉여	8	2007-11-03	08:02:00	139	90	2	482	3362	-5.59781	-1.09457	655	-19	-12	1	1
gosong23_차봉여	9	2007-11-03	08:04:00	152	92	2	484	3364	7.40644	0.908785	2	13	2	1	1
gosong23_차봉여	10	2007-11-03	18:28:00	143	87	2	1108	3988	-0.26928	-3.04403	624	-9	-5	1	1
gosong23_차봉여	11	2007-11-03	18:30:00	140	83	2	1110	3990	-3.26504	-7.04067	2	-3	-4	1	0
gosong23_차봉여	12	2007-11-04	06:51:00	157	90	3	411	4731	15.3075	1.20286	741	17	7	1	1
gosong23_차봉여	13	2007-11-04	06:53:00	145	94	3	413	4733	3.31179	5.20622	2	-12	4	1	1
gosong23_차봉여	14	2007-11-05	11:14:00	157	91	4	674	6434	18.9217	5.06081	1701	12	-3	1	1
gosong23_차봉여	15	2007-11-05	11:16:00	140	85	4	676	6436	1.92598	-0.935832	2	-17	-6	1	1
gosong23_차봉여	16	2007-11-05	19:43:00	124	81	4	1183	6943	-12.998	-4.08499	507	-16	-4	0	0
gosong23_차봉여	17	2007-11-05	19:45:00	125	80	4	1185	6945	-11.9938	-5.08164	2	1	-1	0	0
gosong23_차봉여	18	2007-11-06	05:42:00	134	83	5	342	7542	-1.72682	-1.07976	597	9	3	0	0
gosong23_차봉여	19	2007-11-06	05:44:00	131	88	5	344	7544	-4.72257	3.9236	2	-3	5	0	1
Result	nx	reading.date	reading.time	sbp	dbp	day	minutes	time	res.sbp	res.dbp	dtime	dsbp	ddbp	sbp.bi	dbp.bi
gosong24_이선옥	1	2007-09-19	17:02:00	119	57	0	1022	1022	15.2831	8.94288	NA	NA	NA	0	0
gosong24_이선옥	2	2007-09-19	21:03:00	126	57	0	1263	1263	21.1406	8.65207	241	7	0	0	0
gosong24_이선옥	3	2007-09-20	06:33:00	106	64	1	393	1833	-1.56151	14.9643	570	-20	7	0	0
gosong24_이선옥	4	2007-09-20	07:27:00	41	24	1	447	1887	-66.8175	-25.1009	54	-65	-40	0	0
gosong24_이선옥	5	2007-09-20	17:32:00	112	44	1	1052	2492	1.31445	-5.83096	605	71	20	0	0
gosong24_이선옥	6	2007-09-20	21:06:00	135	54	1	1266	2706	23.3	3.91081	214	23	10	1	0
gosong24_이선옥	7	2007-09-21	06:16:00	124	49	2	376	3256	9.69266	-1.75287	550	-11	-5	0	0
gosong24_이선옥	8	2007-09-21	07:27:00	122	56	2	447	3327	7.35608	5.16146	71	-2	7	0	0
gosong24_이선옥	9	2007-09-21	17:55:00	109	44	2	1075	3955	-8.62099	-7.59635	628	-13	-12	0	0
gosong24_이선옥	10	2007-09-21	21:10:00	120	51	2	1270	4150	1.4546	-0.831653	195	11	7	0	0
gosong24_이선옥	11	2007-09-22	06:12:00	113	44	3	372	4692	-8.11479	-8.48568	542	-7	-7	0	0
gosong24_이선옥	12	2007-09-22	07:05:00	112	43	3	425	4745	-9.36604	-9.54964	53	-1	-1	0	0
gosong24_이선옥	13	2007-09-22	16:52:00	132	60	3	1012	5332	7.85125	6.74204	587	20	17	0	0
gosong24_이선옥	14	2007-09-22	21:39:00	144	59	3	1299	5619	18.4907	5.39571	287	12	-1	1	0
gosong24_이선옥	15	2007-09-23	06:20:00	118	52	4	380	6140	-9.97913	-2.23297	521	-26	-7	0	0
gosong24_이선옥	16	2007-09-23	06:40:00	125	54	4	400	6160	-3.07394	-0.257107	20	7	2	0	0
gosong24_이선옥	17	2007-09-23	17:52:00	136	55	4	1072	6832	4.7404	-0.0680047	672	11	1	1	0
gosong24_이선옥	18	2007-09-24	06:25:00	128	61	5	385	7585	-6.82925	5.02336	753	-8	6	0	0
gosong24_이선옥	19	2007-09-24	07:56:00	139	59	5	476	7676	3.73936	2.91355	91	11	-2	1	0
Result	nx	reading.date	reading.time	sbp	dbp	day	minutes	time	res.sbp	res.dbp	dtime	dsbp	ddbp	sbp.bi	dbp.bi
gosong25_최재일	1	2007-10-05	09:56:00	141	89	0	596	596	26.8342	11.2685	NA	NA	NA	1	1
gosong25_최재일	2	2007-10-07	19:12:00	87	46	2	1152	4032	-32.5279	-34.2993	3436	-54	-43	0	0
gosong25_최재일	3	2007-10-07	19:13:00	96	77	2	1153	4033	-23.5294	-3.3	1	9	31	0	0
gosong25_최재일	4	2007-10-07	19:15:00	114	86	2	1155	4035	-5.53254	5.69851	2	18	9	0	1
gosong25_최재일	5	2007-10-08	18:29:00	120	92	3	1109	5429	-1.70796	10.6567	1394	6	6	0	1
gosong25_최재일	6	2007-10-08	20:36:00	137	88	3	1236	5556	15.0938	6.56184	127	17	-4	1	1
gosong25_최재일	7	2007-10-09	06:09:00	130	80	4	369	6129	7.19964	-1.86637	573	-7	-8	0	0
gosong25_최재일	8	2007-10-09	12:12:00	111	79	4	732	6492	-12.3668	-3.13765	363	-19	-1	0	0
gosong25_최재일	9	2007-10-09	21:37:00	140	91	4	1297	7057	15.7514	8.44012	565	29	12	1	1
gosong25_최재일	10	2007-10-10	07:56:00	136	83	5	476	7676	10.7855	-0.022466	619	-4	-8	1	0
Result	nx	reading.date	reading.time	sbp	dbp	day	minutes	time	res.sbp	res.dbp	dtime	dsbp	ddbp	sbp.bi	dbp.bi
gosong26_김창회	1	2071-11-01	21:06:00	160	84	0	1266	1266	9.28096	1.66641	NA	NA	NA	1	0
gosong26_김창회	2	2071-11-01	22:24:00	143	74	0	1344	1344	-7.55464	-8.31213	78	-17	-10	1	0
gosong26_김창회	3	2071-11-02	06:45:00	146	80	1	405	1845	-3.49864	-2.17428	501	3	6	1	0
gosong26_김창회	4	2071-11-02	08:37:00	176	87	1	517	1957	26.7374	4.85653	112	30	7	1	1
gosong26_김창회	5	2071-11-02	13:24:00	139	75	1	804	2244	-9.65763	-7.0645	287	-37	-12	1	0
gosong26_김창회	6	2071-11-02	20:12:00	144	89	1	1212	2652	-3.79765	7.04775	408	5	14	1	1
gosong26_김창회	7	2071-11-03	06:58:00	118	73	2	418	3298	-28.436	-8.77451	646	-26	-16	0	0
gosong26_김창회	8	2071-11-03	10:28:00	160	87	2	628	3508	14.0066	5.28327	210	42	14	1	1
gosong26_김창회	9	2071-11-03	18:27:00	142	81	2	1107	3987	-2.98376	-0.584941	479	-18	-6	1	0
gosong26_김창회	10	2071-11-03	18:31:00	136	78	2	1111	3991	-8.97533	-3.58384	4	-6	-3	1	0
gosong26_김창회	11	2071-11-04	06:48:00	152	97	3	408	4728	8.57811	15.6189	737	16	19	1	1
gosong26_김창회	12	2071-11-04	06:50:00	148	84	3	410	4730	4.58232	2.61949	2	-4	-13	1	0
gosong26_김창회	13	2071-11-04	19:58:00	146	85	3	1198	5518	4.24326	3.83629	788	-2	1	1	1
gosong26_김창회	14	2071-11-04	20:00:00	132	74	3	1200	5520	-9.75253	-7.16316	2	-14	-11	0	0
gosong26_김창회	15	2071-11-05	06:56:00	144	84	4	416	6176	3.63018	3.01733	656	12	10	1	0
gosong26_김창회	16	2071-11-05	06:59:00	148	88	4	419	6179	7.6365	7.01816	3	4	4	1	1
gosong26_김창회	17	2071-11-06	05:51:00	118	76	5	351	7551	-19.4716	-4.60435	1372	-30	-12	0	0
gosong26_김창회	18	2071-11-06	05:53:00	124	80	5	353	7553	-13.4674	-0.603803	2	6	4	0	0
gosong26_김창회	19	2071-11-06	09:10:00	167	73	5	550	7750	29.9478	-7.5496	197	43	-7	1	0
gosong26_김창회	20	2071-11-06	09:12:00	136	80	5	552	7752	-1.04795	-0.549051	2	-31	7	1	0
Result	nx	reading.date	reading.time	sbp	dbp	day	minutes	time	res.sbp	res.dbp	dtime	dsbp	ddbp	sbp.bi	dbp.bi
gosong27_이광식	1	2007-10-11	11:58:00	132	90	0	718	718	15.2991	15.9505	NA	NA	NA	0	1
gosong27_이광식	2	2007-10-11	22:29:00	105	63	0	1349	1349	-11.0702	-11.8656	631	-27	-27	0	0
gosong27_이광식	3	2007-10-11	22:30:00	104	62	0	1350	1350	-12.0692	-12.8669	1	-1	-1	0	0
gosong27_이광식	4	2007-10-12	07:44:00	104	83	1	464	1904	-11.5154	7.41668	554	0	21	0	0
gosong27_이광식	5	2007-10-12	07:46:00	120	64	1	466	1906	4.48663	-11.5859	2	16	-19	0	0
gosong27_이광식	6	2007-10-12	20:34:00	116	71	1	1234	2674	1.25436	-5.57912	768	-4	7	0	0
gosong27_이광식	7	2007-10-12	20:36:00	119	76	1	1236	2676	4.25636	-0.58171	2	3	5	0	0
gosong27_이광식	8	2007-10-13	07:14:00	118	92	2	434	3314	3.89413	14.5932	638	-1	16	0	1
gosong27_이광식	9	2007-10-13	07:16:00	121	83	2	436	3316	6.89613	5.59061	2	3	-9	0	0
gosong27_이광식	10	2007-10-13	23:01:00	113	77	2	1381	4261	-0.159215	-1.63152	945	-8	-6	0	0
gosong27_이광식	11	2007-10-13	23:03:00	110	78	2	1383	4263	-3.15722	-0.634104	2	-3	1	0	0
gosong27_이광식	12	2007-10-14	06:58:00	115	84	3	418	4738	2.31761	4.7516	475	5	6	0	0
gosong27_이광식	13	2007-10-14	07:00:00	120	90	3	420	4740	7.31961	10.749	2	5	6	0	1
gosong27_이광식	14	2007-10-14	23:21:00	104	76	3	1401	5721	-7.69974	-4.51967	981	-16	-14	0	0
gosong27_이광식	15	2007-10-14	23:22:00	97	68	3	1402	5722	-14.6987	-12.521	1	-7	-8	0	0
gosong27_이광식	16	2007-10-15	07:49:00	126	83	4	469	6229	14.8081	1.82336	507	29	15	0	0
gosong27_이광식	17	2007-10-15	07:51:00	122	85	4	471	6231	10.8101	3.82077	2	-4	2	0	1
gosong27_이광식	18	2007-10-15	23:20:00	103	86	4	1400	7160	-7.26126	3.61934	929	-19	1	0	1
gosong27_이광식	19	2007-10-15	23:23:00	109	78	4	1403	7163	-1.25826	-4.38454	3	6	-8	0	0
gosong27_이광식	20	2007-10-16	08:14:00	109	88	5	494	7694	-0.727453	4.92874	531	0	10	0	1
gosong27_이광식	21	2007-10-16	08:16:00	108	76	5	496	7696	-1.72545	-7.07384	2	-1	-12	0	0
Result	nx	reading.date	reading.time	sbp	dbp	day	minutes	time	res.sbp	res.dbp	dtime	dsbp	ddbp	sbp.bi	dbp.bi
gosong28_정순덕	1	2007-11-01	14:03:00	142	93	0	843	843	5.62872	0.94162	NA	NA	NA	1	1
gosong28_정순덕	2	2007-11-01	21:19:00	131	92	0	1279	1279	-4.32345	0.517097	436	-11	-1	0	1
gosong28_정순덕	3	2007-11-02	08:04:00	148	96	1	484	1924	14.2267	5.36844	645	17	4	1	1
gosong28_정순덕	4	2007-11-02	21:17:00	136	91	1	1277	2717	4.13244	1.41512	793	-12	-5	1	1
gosong28_정순덕	5	2007-11-02	21:19:00	136	91	1	1279	2719	4.13725	1.41776	2	0	0	1	1
gosong28_정순덕	6	2007-11-03	05:22:00	116	82	2	322	3202	-14.702	-6.94473	483	-20	-9	0	0
gosong28_정순덕	7	2007-11-03	05:24:00	111	80	2	324	3204	-19.6972	-8.94209	2	-5	-2	0	0
gosong28_정순덕	8	2007-11-04	06:21:00	123	92	3	381	4701	-4.09948	5.03381	1497	12	12	0	1
gosong28_정순덕	9	2007-11-04	22:31:00	134	85	3	1351	5671	9.23169	-0.685887	970	11	-7	0	1
gosong28_정순덕	10	2007-11-04	22:33:00	128	86	3	1353	5673	3.23649	0.316753	2	-6	1	0	1
gosong28_정순덕	11	2007-11-05	05:55:00	123	84	4	355	6115	-0.701262	-1.09985	442	-5	-2	0	0
gosong28_정순덕	12	2007-11-05	21:21:00	138	91	4	1281	7041	16.5242	7.12238	926	15	7	1	1
gosong28_정순덕	13	2007-11-06	05:30:00	112	80	5	330	7530	-8.30064	-3.23219	489	-26	-11	0	0
gosong28_정순덕	14	2007-11-06	05:33:00	115	82	5	333	7533	-5.29343	-1.22823	3	3	2	0	0
Result	nx	reading.date	reading.time	sbp	dbp	day	minutes	time	res.sbp	res.dbp	dtime	dsbp	ddbp	sbp.bi	dbp.bi
gosong29_김광용	1	2007-10-25	14:07:00	138	91	0	847	847	8.65096	6.7223	NA	NA	NA	1	1
gosong29_김광용	2	2007-10-25	21:02:00	124	79	0	1262	1262	-5.23732	-5.40582	415	-14	-12	0	0
gosong29_김광용	3	2007-10-25	21:03:00	124	79	0	1263	1263	-5.23706	-5.40613	1	0	0	0	0
gosong29_김광용	4	2007-10-26	07:04:00	129	84	1	424	1864	-0.0752717	-0.591669	601	5	5	0	0
gosong29_김광용	5	2007-10-26	07:05:00	124	84	1	425	1865	-5.075	-0.591978	1	-5	0	0	0
gosong29_김광용	6	2007-10-26	20:17:00	132	84	1	1217	2657	3.1382	-0.836485	792	8	0	0	0
gosong29_김광용	7	2007-10-26	20:19:00	124	76	1	1219	2659	-4.86126	-8.8371	2	-8	-8	0	0
gosong29_김광용	8	2007-10-27	06:55:00	131	88	2	415	3295	2.30994	2.96655	636	7	12	0	1
gosong29_김광용	9	2007-10-27	06:56:00	119	88	2	416	3296	-9.68979	2.96624	1	-12	0	0	1
gosong29_김광용	10	2007-10-27	19:02:00	150	95	2	1142	4022	21.5056	9.74211	726	31	7	1	1
gosong29_김광용	11	2007-10-27	19:03:00	139	92	2	1143	4023	10.5059	6.7418	1	-11	-3	1	1
gosong29_김광용	12	2007-10-28	06:41:00	128	90	3	401	4721	-0.306192	4.52632	698	-11	-2	0	1
gosong29_김광용	13	2007-10-28	06:42:00	132	87	3	402	4722	3.69408	1.52601	1	4	-3	0	1
gosong29_김광용	14	2007-10-28	23:31:00	124	83	3	1411	5731	-4.03431	-2.78549	1009	-8	-4	0	0
gosong29_김광용	15	2007-10-28	23:32:00	120	84	3	1412	5732	-8.03404	-1.7858	1	-4	1	0	0
gosong29_김광용	16	2007-10-29	06:55:00	122	81	4	415	6175	-5.91479	-4.92256	443	2	-3	0	0
gosong29_김광용	17	2007-10-29	06:56:00	116	80	4	416	6176	-11.9145	-5.92287	1	-6	-1	0	0
gosong29_김광용	18	2007-10-29	21:14:00	132	86	4	1274	7034	4.31645	-0.187754	858	16	6	0	1
gosong29_김광용	19	2007-10-29	21:15:00	126	86	4	1275	7035	-1.68328	-0.188062	1	-6	0	0	1
gosong29_김광용	20	2007-10-30	06:47:00	131	87	5	407	7607	3.47069	0.63535	572	5	1	0	1
gosong29_김광용	21	2007-10-30	06:48:00	132	88	5	408	7608	4.47096	1.63504	1	1	1	0	1
Result	nx	reading.date	reading.time	sbp	dbp	day	minutes	time	res.sbp	res.dbp	dtime	dsbp	ddbp	sbp.bi	dbp.bi
gosong30_박규태	1	2007-09-19	14:17:00	108	80	0	857	857	3.911	3.29585	NA	NA	NA	0	0
gosong30_박규태	2	2007-09-19	21:31:00	105	77	0	1291	1291	1.23699	0.588932	434	-3	-3	0	0
gosong30_박규태	3	2007-09-20	06:02:00	101	76	1	362	1802	-2.37918	-0.0659903	511	-4	-1	0	0
gosong30_박규태	4	2007-09-20	07:52:00	104	75	1	472	1912	0.703444	-0.991707	110	3	-1	0	0
gosong30_박규태	5	2007-09-20	12:39:00	110	79	1	759	2199	6.91902	3.2021	287	6	4	0	0
gosong30_박규태	6	2007-09-20	21:13:00	100	76	1	1273	2713	-2.6949	0.549207	514	-10	-3	0	0
gosong30_박규태	7	2007-09-21	06:18:00	100	72	2	378	3258	-2.28553	-3.08276	545	0	-4	0	0
gosong30_박규태	8	2007-09-21	08:03:00	104	74	2	483	3363	1.79334	-1.01185	105	4	2	0	0
gosong30_박규태	9	2007-09-21	13:14:00	101	75	2	794	3674	-0.97306	0.198169	311	-3	1	0	0
gosong30_박규태	10	2007-09-21	21:28:00	102	73	2	1288	4168	0.397999	-1.46823	494	1	-2	0	0
gosong30_박규태	11	2007-09-22	06:05:00	90	68	3	365	4685	-11.2137	-6.1191	517	-12	-5	0	0
gosong30_박규태	12	2007-09-22	12:01:00	100	74	3	721	5041	-0.946262	0.121302	356	10	6	0	0
gosong30_박규태	13	2007-09-22	21:26:00	100	75	3	1286	5606	-0.521872	1.50285	565	0	1	0	0
gosong30_박규태	14	2007-09-23	19:35:00	94	69	4	1175	6935	-5.52362	-3.59968	1329	-6	-6	0	0
gosong30_박규태	15	2007-09-24	06:22:00	97	71	5	382	7582	-2.03763	-1.16276	647	3	2	0	0
gosong30_박규태	16	2007-09-24	09:55:00	107	79	5	595	7795	8.12236	6.98107	213	10	8	0	0
gosong30_박규태	17	2007-09-24	18:11:00	104	74	5	1091	8291	5.49492	2.31602	496	-3	-5	0	0
gosong30_박규태	18	2007-09-24	22:47:00	99	72	5	1367	8567	0.702231	0.502404	276	-5	-2	0	0
gosong30_박규태	19	2007-09-25	05:49:00	98	72	6	349	8989	0.0192094	0.78738	422	-1	0	0	0
gosong30_박규태	20	2007-09-25	09:05:00	97	69	6	545	9185	-0.833569	-2.08026	196	-1	-3	0	0
gosong30_박규태	21	2007-09-25	13:56:00	100	69	6	836	9476	2.38501	-1.88375	291	3	0	0	0
gosong30_박규태	22	2007-09-25	21:27:00	95	72	6	1287	9927	-2.27623	1.42081	451	-5	3	0	0
Result	nx	reading.date	reading.time	sbp	dbp	day	minutes	time	res.sbp	res.dbp	dtime	dsbp	ddbp	sbp.bi	dbp.bi
gosong31_권종신	1	2007-11-19	21:52:00	159	89	0	1312	1312	17.5225	1.63102	NA	NA	NA	1	1
gosong31_권종신	2	2007-11-19	21:53:00	140	92	0	1313	1313	-1.47728	4.63218	1	-19	3	1	1
gosong31_권종신	3	2007-11-19	21:56:00	139	85	0	1316	1316	-2.47648	-2.36432	3	-1	-7	1	1
gosong31_권종신	4	2007-11-19	21:59:00	146	88	0	1319	1319	4.52431	0.639184	3	7	3	1	1
gosong31_권종신	5	2007-11-20	08:31:00	140	88	1	511	1951	-1.30811	1.37674	632	-6	0	1	1
gosong31_권종신	6	2007-11-20	08:32:00	135	84	1	512	1952	-6.30784	-2.62209	1	-5	-4	1	0
gosong31_권종신	7	2007-11-20	08:34:00	144	84	1	514	1954	2.69269	-2.61976	2	9	0	1	0
gosong31_권종신	8	2007-11-22	07:54:00	136	85	3	474	4794	-4.55427	1.69457	2840	-8	1	1	1
gosong31_권종신	9	2007-11-22	07:55:00	132	85	3	475	4795	-8.554	1.69574	1	-4	0	0	1
gosong31_권종신	10	2007-11-22	07:56:00	129	88	3	476	4796	-11.5537	4.6969	1	-3	3	0	1
gosong31_권종신	11	2007-11-22	07:58:00	131	86	3	478	4798	-9.55321	2.69924	2	2	-2	0	1
gosong31_권종신	12	2007-11-22	22:43:00	128	76	3	1363	5683	-12.3185	-6.26795	885	-3	-10	0	0
gosong31_권종신	13	2007-11-22	22:46:00	130	73	3	1366	5686	-10.3177	-9.26445	3	2	-3	0	0
gosong31_권종신	14	2007-11-23	08:08:00	157	76	4	488	6248	16.8313	-5.60859	562	27	3	1	0
gosong31_권종신	15	2007-11-23	08:20:00	154	82	4	500	6260	13.8344	0.405418	12	-3	6	1	0
gosong31_권종신	16	2007-11-23	22:03:00	157	80	4	1323	7083	17.0527	-0.634126	823	3	-2	1	0
gosong31_권종신	17	2007-11-23	22:07:00	144	83	4	1327	7087	4.05373	2.37054	4	-13	3	1	0
gosong31_권종신	18	2007-11-24	08:49:00	140	83	5	529	7729	0.223965	3.11977	642	-4	0	1	0
gosong31_권종신	19	2007-11-24	09:04:00	137	78	5	544	7744	-2.77206	-1.86273	15	-3	-5	1	0
gosong31_권종신	20	2007-11-24	09:06:00	133	84	5	546	7746	-6.77153	4.13961	2	-4	6	0	0
gosong31_권종신	21	2007-11-24	09:09:00	141	82	5	549	7749	1.22927	2.14311	3	8	-2	1	0
Result	nx	reading.date	reading.time	sbp	dbp	day	minutes	time	res.sbp	res.dbp	dtime	dsbp	ddbp	sbp.bi	dbp.bi
gosong32_이석수	1	2007-10-25	14:09:00	125	82	0	849	849	-19.6388	-11.0893	NA	NA	NA	0	0
gosong32_이석수	2	2007-10-25	21:10:00	113	80	0	1270	1270	-33.1222	-13.9708	421	-12	-2	0	0
gosong32_이석수	3	2007-10-25	21:11:00	108	74	0	1271	1271	-38.1257	-19.9729	1	-5	-6	0	0
gosong32_이석수	4	2007-10-25	21:13:00	111	76	0	1273	1273	-35.1328	-17.9771	2	3	2	0	0
gosong32_이석수	5	2007-10-25	21:15:00	133	90	0	1275	1275	-13.1398	-3.98126	2	22	14	0	1
gosong32_이석수	6	2007-10-25	21:16:00	130	88	0	1276	1276	-16.1433	-5.98335	1	-3	-2	0	1
gosong32_이석수	7	2007-10-26	05:34:00	168	107	1	334	1774	20.1019	11.9739	498	38	19	1	1
gosong32_이석수	8	2007-10-26	05:36:00	168	104	1	336	1776	20.0949	8.96972	2	0	-3	1	1
gosong32_이석수	9	2007-10-26	05:38:00	160	98	1	338	1778	12.0878	2.96553	2	-8	-6	1	1
gosong32_이석수	10	2007-10-26	06:33:00	182	107	1	393	1833	33.8941	11.8504	55	22	9	1	1
gosong32_이석수	11	2007-10-26	06:35:00	177	100	1	395	1835	28.887	4.84618	2	-5	-7	1	1
gosong32_이석수	12	2007-10-26	10:05:00	129	92	1	605	2045	-19.8529	-3.59353	210	-48	-8	0	1
gosong32_이석수	13	2007-10-26	10:07:00	129	88	1	607	2047	-19.86	-7.59771	2	0	-4	0	1
gosong32_이석수	14	2007-10-26	18:44:00	185	113	1	1124	2564	34.3183	16.3198	517	56	25	1	1
gosong32_이석수	15	2007-10-26	18:46:00	176	108	1	1126	2566	25.3113	11.3156	2	-9	-5	1	1
gosong32_이석수	16	2007-10-26	23:25:00	160	106	1	1405	2845	8.32822	8.73139	279	-16	-2	1	1
gosong32_이석수	17	2007-10-26	23:26:00	148	99	1	1406	2846	-3.6753	1.7293	1	-12	-7	1	1
gosong32_이석수	18	2007-10-27	05:37:00	160	104	2	337	3217	7.01746	5.95248	371	12	5	1	1
gosong32_이석수	19	2007-10-27	05:39:00	161	105	2	339	3219	8.01042	6.94829	2	1	1	1	1
gosong32_이석수	20	2007-10-27	23:02:00	191	112	2	1382	4262	34.3354	11.7644	1043	30	7	1	1
gosong32_이석수	21	2007-10-27	23:04:00	177	109	2	1384	4264	20.3283	8.76021	2	-14	-3	1	1
gosong32_이석수	22	2007-10-28	06:36:00	157	100	3	396	4716	-1.26434	-1.18621	452	-20	-9	1	1
gosong32_이석수	23	2007-10-28	06:37:00	152	99	3	397	4717	-6.26786	-2.18831	1	-5	-1	1	1
gosong32_이석수	24	2007-10-28	22:25:00	163	106	3	1345	5665	1.39182	2.82672	948	11	7	1	1
gosong32_이석수	25	2007-10-28	22:27:00	152	97	3	1347	5667	-9.61523	-6.17747	2	-11	-9	1	1
gosong32_이석수	26	2007-10-29	06:13:00	180	108	4	373	6133	16.7428	3.8468	466	28	11	1	1
gosong32_이석수	27	2007-10-29	06:15:00	173	106	4	375	6135	9.73575	1.84261	2	-7	-2	1	1
gosong32_이석수	28	2007-10-29	13:37:00	167	104	4	817	6577	2.17834	-1.08287	442	-6	-2	1	1
gosong32_이석수	29	2007-10-29	13:38:00	144	93	4	818	6578	-20.8252	-12.085	1	-23	-11	1	1
gosong32_이석수	30	2007-10-29	22:51:00	152	106	4	1371	7131	-14.7737	-0.242869	553	8	13	1	1
gosong32_이석수	31	2007-10-29	22:52:00	168	109	4	1372	7132	1.22277	2.75504	1	16	3	1	1
gosong32_이석수	32	2007-10-30	05:56:00	160	102	5	356	7556	-8.27122	-5.13276	424	-8	-7	1	1
gosong32_이석수	33	2007-10-30	05:58:00	144	96	5	358	7558	-24.2783	-11.1369	2	-16	-6	1	1
Result	nx	reading.date	reading.time	sbp	dbp	day	minutes	time	res.sbp	res.dbp	dtime	dsbp	ddbp	sbp.bi	dbp.bi
gosong33_이진원	1	2007-09-28	14:40:00	111	70	0	880	880	-15.3208	-8.70446	NA	NA	NA	0	0
gosong33_이진원	2	2007-09-28	20:16:00	128	85	0	1216	1216	1.99017	6.59113	336	17	15	0	1
gosong33_이진원	3	2007-09-29	06:28:00	132	80	1	388	1828	6.5565	2.12952	612	4	-5	0	0
gosong33_이진원	4	2007-09-29	18:26:00	122	79	1	1106	2546	-2.77909	1.76115	718	-10	-1	0	0
gosong33_이진원	5	2007-09-29	20:06:00	133	76	1	1206	2646	8.31345	-1.15088	100	11	-3	0	0
gosong33_이진원	6	2007-09-29	21:11:00	122	76	1	1271	2711	-2.6264	-1.0937	65	-11	0	0	0
gosong33_이진원	7	2007-09-30	06:34:00	136	90	2	394	3274	11.8946	13.4016	563	14	14	1	1
gosong33_이진원	8	2007-09-30	08:20:00	132	84	2	500	3380	7.99267	7.49484	106	-4	-6	0	0
gosong33_이진원	9	2007-09-30	19:13:00	100	55	2	1153	4033	-23.4031	-20.9307	653	-32	-29	0	0
gosong33_이진원	10	2007-09-30	22:00:00	120	74	2	1320	4200	-3.24852	-1.7838	167	20	19	0	0
gosong33_이진원	11	2007-10-01	06:34:00	141	85	3	394	4714	18.2271	9.66838	514	21	11	1	1
gosong33_이진원	12	2007-10-01	18:16:00	97	48	3	1096	5416	-25.1233	-26.7141	702	-44	-37	0	0
gosong33_이진원	13	2007-10-01	20:18:00	124	78	3	1218	5538	1.98962	3.39326	122	27	30	0	0
gosong33_이진원	14	2007-10-01	22:39:00	138	87	3	1359	5679	16.1201	12.5173	141	14	9	1	1
gosong33_이진원	15	2007-10-02	06:17:00	124	76	4	377	6137	2.54392	1.92022	458	-14	-11	0	0
gosong33_이진원	16	2007-10-02	07:48:00	127	68	4	468	6228	5.62812	-5.99973	91	3	-8	0	0
gosong33_이진원	17	2007-10-02	21:37:00	110	70	4	1297	7057	-10.6047	-3.27045	829	-17	2	0	0
gosong33_이진원	18	2007-10-02	23:26:00	120	78	4	1406	7166	-0.503879	4.82544	109	10	8	0	0
gosong33_이진원	19	2007-10-03	06:46:00	138	82	5	406	7606	17.9033	9.21252	440	18	4	1	0
gosong33_이진원	20	2007-10-03	16:37:00	104	69	5	997	8197	-15.5498	-3.26757	591	-34	-13	0	0
Result	nx	reading.date	reading.time	sbp	dbp	day	minutes	time	res.sbp	res.dbp	dtime	dsbp	ddbp	sbp.bi	dbp.bi
gosong34_정명화	1	2007-10-25	14:08:00	125	78	0	848	848	13.3652	5.57725	NA	NA	NA	0	0
gosong34_정명화	2	2007-10-25	19:07:00	117	76	0	1147	1147	5.38357	3.57587	299	-8	-2	0	0
gosong34_정명화	3	2007-10-25	19:08:00	115	76	0	1148	1148	3.38363	3.57587	1	-2	0	0	0
gosong34_정명화	4	2007-10-25	19:10:00	75	58	0	1150	1150	-36.6162	-14.4241	2	-40	-18	0	0
gosong34_정명화	5	2007-10-26	07:11:00	104	71	1	431	1871	-7.57183	-1.42746	721	29	13	0	0
gosong34_정명화	6	2007-10-26	07:14:00	102	69	1	434	1874	-9.57165	-3.42747	3	-2	-2	0	0
gosong34_정명화	7	2007-10-26	21:17:00	113	66	1	1277	2717	1.48029	-6.43136	843	11	-3	0	0
gosong34_정명화	8	2007-10-27	08:50:00	128	82	2	530	3410	16.523	9.56545	693	15	16	0	0
gosong34_정명화	9	2007-10-27	18:57:00	135	78	2	1137	4017	23.5604	5.56266	607	7	-4	1	0
gosong34_정명화	10	2007-10-28	08:09:00	120	80	3	489	4809	8.60916	7.55901	792	-15	2	0	0
gosong34_정명화	11	2007-10-28	18:50:00	114	72	3	1130	5450	2.64865	-0.443939	641	-6	-8	0	0
gosong34_정명화	12	2007-10-29	08:55:00	108	64	4	535	6295	-3.2993	-8.44783	845	-6	-8	0	0
gosong34_정명화	13	2007-10-29	23:04:00	112	71	4	1384	7144	0.753004	-1.45174	849	4	7	0	0
gosong34_정명화	14	2007-10-30	07:27:00	109	73	5	447	7647	-2.21601	0.545945	503	-3	2	0	0
gosong34_정명화	15	2007-10-30	07:28:00	104	74	5	448	7648	-7.21595	1.54594	1	-5	1	0	0
gosong34_정명화	16	2007-10-30	07:30:00	102	71	5	450	7650	-9.21582	-1.45407	2	-2	-3	0	0
Result	nx	reading.date	reading.time	sbp	dbp	day	minutes	time	res.sbp	res.dbp	dtime	dsbp	ddbp	sbp.bi	dbp.bi
gosong35_김정자	1	2007-10-11	11:58:00	116	71	0	718	718	-4.93899	-3.08486	NA	NA	NA	0	0
gosong35_김정자	2	2007-10-11	23:03:00	134	79	0	1383	1383	13.8546	4.64311	665	18	8	0	0
gosong35_김정자	3	2007-10-11	23:04:00	126	79	0	1384	1384	5.85577	4.6427	1	-8	0	0	0
gosong35_김정자	4	2007-10-12	05:31:00	124	70	1	331	1771	4.31759	-4.5156	387	-2	-9	0	0
gosong35_김정자	5	2007-10-12	05:33:00	113	72	1	333	1773	-6.68002	-2.51642	2	-11	2	0	0
gosong35_김정자	6	2007-10-12	22:58:00	123	78	1	1378	2818	4.56701	3.05611	1045	10	6	0	0
gosong35_김정자	7	2007-10-12	23:00:00	124	77	1	1380	2820	5.5694	2.05529	2	1	-1	0	0
gosong35_김정자	8	2007-10-13	06:54:00	117	76	2	414	3294	-0.864958	0.861399	474	-7	-1	0	0
gosong35_김정자	9	2007-10-13	06:56:00	109	76	2	416	3296	-8.86257	0.860581	2	-8	0	0	0
gosong35_김정자	10	2007-10-13	23:19:00	116	65	2	1399	4279	-0.689523	-10.5415	983	7	-11	0	0
gosong35_김정자	11	2007-10-13	23:21:00	116	76	2	1401	4281	-0.687136	0.457657	2	0	11	0	0
gosong35_김정자	12	2007-10-14	06:40:00	100	73	3	400	4720	-16.1633	-2.72192	439	-16	-3	0	0
gosong35_김정자	13	2007-10-14	06:41:00	109	76	3	401	4721	-7.16207	0.277671	1	9	3	0	0
gosong35_김정자	14	2007-10-14	22:56:00	130	84	3	1376	5696	15.0014	7.87884	975	21	8	0	0
gosong35_김정자	15	2007-10-14	22:57:00	124	80	3	1377	5697	9.00263	3.87843	1	-6	-4	0	0
gosong35_김정자	16	2007-10-15	07:00:00	101	76	4	420	6180	-13.421	-0.319146	483	-23	-4	0	0
gosong35_김정자	17	2007-10-15	07:01:00	106	73	4	421	6181	-8.4198	-3.31956	1	5	-3	0	0
gosong35_김정자	18	2007-10-15	07:03:00	96	73	4	423	6183	-18.4174	-3.32037	2	-10	0	0	0
gosong35_김정자	19	2007-10-15	23:33:00	116	79	4	1413	7173	2.76399	2.27466	990	20	6	0	0
gosong35_김정자	20	2007-10-15	23:34:00	116	76	4	1414	7174	2.76518	-0.725751	1	0	-3	0	0
gosong35_김정자	21	2007-10-16	07:05:00	124	75	5	425	7625	11.3034	-1.91024	451	8	-1	0	0
gosong35_김정자	22	2007-10-16	07:07:00	124	79	5	427	7627	11.3058	2.08894	2	0	4	0	0
Result	nx	reading.date	reading.time	sbp	dbp	day	minutes	time	res.sbp	res.dbp	dtime	dsbp	ddbp	sbp.bi	dbp.bi
gosong36_박규천	1	2027-11-28	15:22:00	119	80	0	922	922	-3.26669	-2.36007	NA	NA	NA	0	0
gosong36_박규천	2	2027-11-28	23:59:00	137	92	0	1439	1439	14.3169	9.66305	517	18	12	1	1
gosong36_박규천	3	2027-11-29	11:39:00	115	82	1	699	2139	-8.24694	-0.305646	700	-22	-10	0	0
gosong36_박규천	4	2027-11-30	11:03:00	119	76	2	663	3543	-5.37782	-6.24286	1404	4	-6	0	0
gosong36_박규천	5	2027-12-01	02:23:00	128	82	3	143	4463	2.88115	-0.201711	920	9	6	0	0
gosong36_박규천	6	2027-12-01	11:08:00	124	80	3	668	4988	-1.54172	-2.17823	525	-4	-2	0	0
gosong36_박규천	7	2027-12-02	00:01:00	128	85	4	1	5761	1.83565	2.85634	773	4	5	0	1
gosong36_박규천	8	2027-12-02	12:09:00	122	73	4	729	6489	-4.75073	-9.1111	728	-6	-12	0	0
gosong36_박규천	9	2027-12-02	23:31:00	131	86	4	1411	7171	3.69994	3.9194	682	9	13	0	1
gosong36_박규천	10	2027-12-03	12:51:00	120	79	5	771	7971	-7.94443	-3.04482	800	-11	-7	0	0
gosong36_박규천	11	2027-12-04	01:01:00	140	88	6	61	8701	11.4676	5.98782	730	20	9	1	1
gosong36_박규천	12	2027-12-04	12:12:00	126	83	6	732	9372	-3.07289	1.01783	671	-14	-5	0	0
Result	nx	reading.date	reading.time	sbp	dbp	day	minutes	time	res.sbp	res.dbp	dtime	dsbp	ddbp	sbp.bi	dbp.bi
gosong37_허옥녀	1	2007-11-29	19:26:00	125	80	0	1166	1166	1.60513	2.50878	NA	NA	NA	0	0
gosong37_허옥녀	2	2007-11-30	09:06:00	122	76	1	546	1986	-0.0517302	-1.25566	820	-3	-4	0	0
gosong37_허옥녀	3	2007-12-01	08:19:00	120	78	2	499	3379	0.229963	1.1445	1393	-2	2	0	0
gosong37_허옥녀	4	2007-12-01	21:57:00	128	84	2	1317	4197	9.56982	7.37948	818	8	6	0	0
gosong37_허옥녀	5	2007-12-02	19:26:00	103	68	3	1166	5486	-13.3188	-8.25023	1289	-25	-16	0	0
gosong37_허옥녀	6	2007-12-02	19:28:00	100	65	3	1168	5488	-16.3156	-11.2497	2	-3	-3	0	0
gosong37_허옥녀	7	2007-12-03	11:56:00	125	79	4	716	6476	10.3028	3.03416	988	25	14	0	0
gosong37_허옥녀	8	2007-12-03	18:57:00	116	79	4	1137	6897	1.99234	3.1551	421	-9	0	0	0
gosong37_허옥녀	9	2007-12-04	07:15:00	107	74	5	435	7635	-5.79883	-1.6329	738	-9	-5	0	0
gosong37_허옥녀	10	2007-12-04	07:19:00	116	76	5	439	7639	3.20772	0.368246	4	9	2	0	0
gosong37_허옥녀	11	2007-12-04	12:16:00	124	77	5	736	7936	11.6942	1.45356	297	8	1	0	0
gosong37_허옥녀	12	2007-12-04	18:53:00	119	78	5	1133	8333	7.34447	2.56761	397	-5	1	0	0
gosong37_허옥녀	13	2007-12-05	07:02:00	100	76	6	422	9062	-10.4614	0.777024	729	-19	-2	0	0
Result	nx	reading.date	reading.time	sbp	dbp	day	minutes	time	res.sbp	res.dbp	dtime	dsbp	ddbp	sbp.bi	dbp.bi
gosong38_김순분	1	2007-11-01	14:02:00	141	76	0	842	842	-1.65587	-1.49475	NA	NA	NA	1	0
gosong38_김순분	2	2007-11-02	15:31:00	136	78	1	931	2371	-6.47619	0.450047	1529	-5	2	1	0
gosong38_김순분	3	2007-11-02	15:32:00	149	88	1	932	2372	6.52393	10.45	1	13	10	1	1
gosong38_김순분	4	2007-11-02	20:26:00	155	79	1	1226	2666	12.5585	1.4394	294	6	-9	1	0
gosong38_김순분	5	2007-11-02	20:28:00	140	74	1	1228	2668	-2.44129	-3.56068	2	-15	-5	1	0
gosong38_김순분	6	2007-11-03	06:49:00	143	76	2	409	3289	0.631689	-1.5831	621	3	2	1	0
gosong38_김순분	7	2007-11-03	06:50:00	124	73	2	410	3290	-18.3682	-4.58314	1	-19	-3	0	0
gosong38_김순분	8	2007-11-03	20:30:00	144	78	2	1230	4110	1.72817	0.387257	820	20	5	1	0
gosong38_김순분	9	2007-11-03	20:31:00	140	74	2	1231	4111	-2.27171	-3.61278	1	-4	-4	1	0
gosong38_김순분	10	2007-11-04	06:22:00	141	79	3	382	4702	-1.20226	1.36588	591	1	5	1	0
gosong38_김순분	11	2007-11-04	06:23:00	145	74	3	383	4703	2.79785	-3.63415	1	4	-5	1	0
gosong38_김순분	12	2007-11-04	21:12:00	153	80	3	1272	5592	10.9023	2.33375	889	8	6	1	0
gosong38_김순분	13	2007-11-04	21:13:00	148	76	3	1273	5593	5.90244	-1.66629	1	-5	-4	1	0
gosong38_김순분	14	2007-11-05	07:08:00	150	81	4	428	6188	7.97236	3.31223	595	2	5	1	0
gosong38_김순분	15	2007-11-05	07:09:00	137	76	4	429	6189	-5.02752	-1.68781	1	-13	-5	1	0
gosong38_김순분	16	2007-11-05	21:19:00	146	81	4	1279	7039	4.07237	3.2815	850	9	5	1	0
gosong38_김순분	17	2007-11-05	21:21:00	132	82	4	1281	7041	-9.9274	4.28143	2	-14	1	0	0
gosong38_김순분	18	2007-11-06	06:57:00	140	78	5	417	7617	-1.85971	0.260631	576	8	-4	1	0
gosong38_김순분	19	2007-11-06	06:59:00	138	72	5	419	7619	-3.85947	-5.73944	2	-2	-6	1	0
Result	nx	reading.date	reading.time	sbp	dbp	day	minutes	time	res.sbp	res.dbp	dtime	dsbp	ddbp	sbp.bi	dbp.bi
gosong39_유정일	1	2007-09-19	17:57:00	126	74	0	1077	1077	4.35158	3.65881	NA	NA	NA	0	0
gosong39_유정일	2	2007-09-19	23:10:00	114	71	0	1390	1390	-7.00804	0.942565	313	-12	-3	0	0
gosong39_유정일	3	2007-09-20	06:33:00	123	68	1	393	1833	2.8983	-1.65582	443	9	-3	0	0
gosong39_유정일	4	2007-09-20	09:04:00	121	69	1	544	1984	1.20724	-0.518931	151	-2	1	0	0
gosong39_유정일	5	2007-09-20	21:05:00	116	70	1	1265	2705	-2.31765	1.13471	721	-5	1	0	0
gosong39_유정일	6	2007-09-20	23:32:00	116	68	1	1412	2852	-2.0169	-0.732027	147	0	-2	0	0
gosong39_유정일	7	2007-09-21	06:17:00	115	69	2	377	3257	-2.1883	0.635134	405	-1	1	0	0
gosong39_유정일	8	2007-09-21	09:24:00	117	60	2	564	3444	0.194293	-8.19534	187	2	-9	0	0
gosong39_유정일	9	2007-09-21	19:35:00	113	64	2	1175	4055	-2.55565	-3.64142	611	-4	4	0	0
gosong39_유정일	10	2007-09-21	23:02:00	113	71	2	1382	4262	-2.13214	3.54624	207	0	7	0	0
gosong39_유정일	11	2007-09-22	06:26:00	116	67	3	386	4706	1.77625	-0.0512444	444	3	-4	0	0
gosong39_유정일	12	2007-09-22	07:53:00	126	68	3	473	4793	11.9542	1.02763	87	10	1	0	0
gosong39_유정일	13	2007-09-22	19:55:00	112	68	3	1195	5515	-0.568592	1.68217	722	-14	0	0	0
gosong39_유정일	14	2007-09-22	22:51:00	109	65	3	1371	5691	-3.20851	-1.15827	176	-3	-3	0	0
gosong39_유정일	15	2007-09-23	07:26:00	116	71	4	446	6206	4.84514	5.30861	515	7	6	0	0
gosong39_유정일	16	2007-09-23	20:41:00	103	62	4	1241	7001	-6.52834	-2.97066	795	-13	-9	0	0
gosong39_유정일	17	2007-09-24	06:33:00	113	69	5	393	7593	4.68284	4.56603	592	10	7	0	0
gosong39_유정일	18	2007-09-24	22:17:00	103	60	5	1337	8537	-3.3858	-3.57817	944	-10	-9	0	0
Result	nx	reading.date	reading.time	sbp	dbp	day	minutes	time	res.sbp	res.dbp	dtime	dsbp	ddbp	sbp.bi	dbp.bi
gosong40_이성자	1	2007-10-11	11:54:00	145	96	0	714	714	11.9375	6.5001	NA	NA	NA	1	1
gosong40_이성자	2	2007-10-11	11:58:00	144	97	0	718	718	10.9295	7.49532	4	-1	1	1	1
gosong40_이성자	3	2007-10-11	22:56:00	119	81	0	1376	1376	-15.39	-9.29106	658	-25	-16	0	0
gosong40_이성자	4	2007-10-11	22:58:00	120	78	0	1378	1378	-14.394	-12.2934	2	1	-3	0	0
gosong40_이성자	5	2007-10-11	23:00:00	116	81	0	1380	1380	-18.3981	-9.29584	2	-4	3	0	0
gosong40_이성자	6	2007-10-12	07:41:00	143	90	1	461	1901	7.55718	-0.918491	521	27	9	1	1
gosong40_이성자	7	2007-10-12	07:42:00	142	96	1	462	1902	6.55518	5.08031	1	-1	6	1	1
gosong40_이성자	8	2007-10-12	21:46:00	135	85	1	1306	2746	-2.1373	-6.92836	844	-7	-11	1	1
gosong40_이성자	9	2007-10-12	21:48:00	130	92	1	1308	2748	-7.14131	0.0692527	2	-5	7	0	1
gosong40_이성자	10	2007-10-13	07:48:00	147	106	2	468	3348	8.65551	13.3522	600	17	14	1	1
gosong40_이성자	11	2007-10-13	07:49:00	150	102	2	469	3349	11.6535	9.35099	1	3	-4	1	1
gosong40_이성자	12	2007-10-13	23:33:00	147	97	2	1413	4293	6.7605	3.22281	944	-3	-5	1	1
gosong40_이성자	13	2007-10-13	23:35:00	144	98	2	1415	4295	3.75649	4.22042	2	-3	1	1	1
gosong40_이성자	14	2007-10-14	07:20:00	143	95	3	440	4760	1.82402	0.664695	465	-1	-3	1	1
gosong40_이성자	15	2007-10-14	07:22:00	143	98	3	442	4762	1.82001	3.6623	2	0	3	1	1
gosong40_이성자	16	2007-10-15	00:33:00	136	88	4	33	5793	-7.24746	-7.56985	1031	-7	-10	1	1
gosong40_이성자	17	2007-10-15	00:35:00	138	85	4	35	5795	-5.25147	-10.5722	2	2	-3	1	1
gosong40_이성자	18	2007-10-15	08:35:00	149	104	4	515	6275	4.78599	7.85411	480	11	19	1	1
gosong40_이성자	19	2007-10-15	08:37:00	138	92	4	517	6277	-6.21802	-4.14828	2	-11	-12	1	1
gosong40_이성자	20	2007-10-15	23:39:00	143	96	4	1419	7179	-3.0268	-1.22627	902	5	4	1	1
gosong40_이성자	21	2007-10-15	23:41:00	149	98	4	1421	7181	2.96918	0.771337	2	6	2	1	1
Result	nx	reading.date	reading.time	sbp	dbp	day	minutes	time	res.sbp	res.dbp	dtime	dsbp	ddbp	sbp.bi	dbp.bi
gosong41_장두순	1	2079-12-05	09:10:00	125	78	0	550	550	-0.695851	4.83742	NA	NA	NA	0	0
gosong41_장두순	2	2079-12-05	21:02:00	122	72	0	1262	1262	-2.40545	-0.820393	712	-3	-6	0	0
gosong41_장두순	3	2079-12-05	21:04:00	116	72	0	1264	1264	-8.40183	-0.819431	2	-6	0	0	0
gosong41_장두순	4	2079-12-06	07:35:00	117	69	1	455	1895	-6.25823	-3.51617	631	1	-3	0	0
gosong41_장두순	5	2079-12-06	07:37:00	113	70	1	457	1897	-10.2546	-2.51521	2	-4	1	0	0
gosong41_장두순	6	2079-12-06	21:57:00	120	71	1	1317	2757	-1.69598	-1.10189	860	7	1	0	0
gosong41_장두순	7	2079-12-06	21:59:00	117	72	1	1319	2759	-4.69235	-0.100927	2	-3	1	0	0
gosong41_장두순	8	2079-12-06	22:09:00	150	80	1	1329	2769	28.3258	7.90388	10	33	8	1	0
gosong41_장두순	9	2079-12-06	22:11:00	144	80	1	1331	2771	22.3294	7.90484	2	-6	0	1	0
gosong41_장두순	10	2079-12-07	07:20:00	132	72	2	440	3320	11.3244	0.168692	549	-12	-8	0	0
gosong41_장두순	11	2079-12-07	07:22:00	120	69	2	442	3322	-0.671997	-2.83035	2	-12	-3	0	0
gosong41_장두순	12	2079-12-07	16:54:00	135	78	2	1014	3894	15.3647	6.44456	572	15	9	1	0
gosong41_장두순	13	2079-12-07	21:00:00	116	68	2	1260	4140	-3.18949	-3.43721	246	-19	-10	0	0
gosong41_장두순	14	2079-12-07	21:02:00	110	72	2	1262	4142	-9.18586	0.563749	2	-6	4	0	0
gosong41_장두순	15	2079-12-07	21:04:00	100	57	2	1264	4144	-19.1822	-14.4353	2	-10	-15	0	0
gosong41_장두순	16	2079-12-08	07:46:00	118	73	3	466	4786	-0.0187054	1.87326	642	18	16	0	0
gosong41_장두순	17	2079-12-08	07:48:00	110	73	3	468	4788	-8.01508	1.87422	2	-8	0	0	0
gosong41_장두순	18	2079-12-08	21:24:00	123	65	3	1284	5604	6.4638	-5.73361	816	13	-8	0	0
gosong41_장두순	19	2079-12-08	21:26:00	113	69	3	1286	5606	-3.53257	-1.73265	2	-10	4	0	0
gosong41_장두순	20	2079-12-09	06:50:00	112	68	4	410	6170	-3.5104	-2.46159	564	-1	-1	0	0
gosong41_장두순	21	2079-12-09	06:52:00	102	68	4	412	6172	-13.5068	-2.46062	2	-10	0	0	0
gosong41_장두순	22	2079-12-09	21:08:00	121	69	4	1268	7028	7.0446	-1.04923	856	19	1	0	0
gosong41_장두순	23	2079-12-09	21:10:00	110	70	4	1270	7030	-3.95178	-0.0482652	2	-11	1	0	0
gosong41_장두순	24	2079-12-10	07:22:00	123	78	5	442	7642	10.1574	8.24586	612	13	8	0	0
gosong41_장두순	25	2079-12-10	07:23:00	111	73	5	443	7643	-1.8408	3.24635	1	-12	-5	0	0
Result	nx	reading.date	reading.time	sbp	dbp	day	minutes	time	res.sbp	res.dbp	dtime	dsbp	ddbp	sbp.bi	dbp.bi
gosong42_최영화	1	2008-07-29	14:10:00	145	94	0	850	850	12.4925	4.12689	NA	NA	NA	1	1
gosong42_최영화	2	2008-07-29	21:09:00	131	87	0	1269	1269	-1.21376	-2.71461	419	-14	-7	0	1
gosong42_최영화	3	2008-07-29	21:11:00	129	86	0	1271	1271	-3.21236	-3.71385	2	-2	-1	0	1
gosong42_최영화	4	2008-07-30	07:12:00	135	93	1	432	1872	3.20897	3.5135	601	6	7	1	1
gosong42_최영화	5	2008-07-30	07:14:00	130	92	1	434	1874	-1.78963	2.51426	2	-5	-1	0	1
gosong42_최영화	6	2008-07-30	22:17:00	127	89	1	1337	2777	-4.15659	-0.144145	903	-3	-3	0	1
gosong42_최영화	7	2008-07-30	22:19:00	124	89	1	1339	2779	-7.15519	-0.143388	2	-3	0	0	1
gosong42_최영화	8	2008-07-31	07:03:00	135	87	2	423	3303	4.21216	-1.94516	524	11	-2	1	1
gosong42_최영화	9	2008-07-31	07:04:00	127	87	2	424	3304	-3.78714	-1.94478	1	-8	0	0	1
gosong42_최영화	10	2008-07-31	19:09:00	127	86	2	1149	4029	-3.27888	-2.67052	725	0	-1	0	1
gosong42_최영화	11	2008-07-31	19:10:00	131	80	2	1150	4030	0.721823	-8.67014	1	4	-6	0	0
gosong42_최영화	12	2008-08-01	07:07:00	133	93	3	427	4747	3.22447	4.60109	717	2	13	0	1
gosong42_최영화	13	2008-08-01	07:09:00	120	89	3	429	4749	-9.77413	0.601847	2	-13	-4	0	1
gosong42_최영화	14	2008-08-01	23:01:00	142	91	3	1381	5701	12.8933	2.96198	952	22	2	1	1
gosong42_최영화	15	2008-08-01	23:03:00	128	91	3	1383	5703	-1.10533	2.96274	2	-14	0	0	1
gosong42_최영화	16	2008-08-02	08:29:00	134	94	4	509	6269	5.29146	6.17685	566	6	3	0	1
gosong42_최영화	17	2008-08-02	08:31:00	127	94	4	511	6271	-1.70714	6.17761	2	-7	0	0	1
gosong42_최영화	18	2008-08-02	21:18:00	116	83	4	1278	7038	-12.1694	-4.53224	767	-11	-11	0	0
gosong42_최영화	19	2008-08-02	21:20:00	121	82	4	1280	7040	-7.16803	-5.53149	2	5	-1	0	0
gosong42_최영화	20	2008-08-03	06:56:00	138	86	5	416	7616	10.2358	-1.31359	576	17	4	1	1
gosong42_최영화	21	2008-08-03	06:58:00	132	87	5	418	7618	4.23717	-0.312833	2	-6	1	0	1
Result	nx	reading.date	reading.time	sbp	dbp	day	minutes	time	res.sbp	res.dbp	dtime	dsbp	ddbp	sbp.bi	dbp.bi
gosong43_박정순	1	2007-10-05	09:08:00	123	71	0	548	548	-0.947409	0.149095	NA	NA	NA	0	0
gosong43_박정순	2	2007-10-05	12:56:00	126	72	0	776	776	2.37763	1.20331	228	3	1	0	0
gosong43_박정순	3	2007-10-07	11:56:00	128	76	2	716	3596	8.39787	5.87381	2820	2	4	0	0
gosong43_박정순	4	2007-10-07	13:53:00	103	59	2	833	3713	-16.4353	-11.0984	117	-25	-17	0	0
gosong43_박정순	5	2007-10-07	19:18:00	115	67	2	1158	4038	-3.972	-3.0211	325	12	8	0	0
gosong43_박정순	6	2007-10-08	05:59:00	124	79	3	359	4679	5.94182	9.13131	641	9	12	0	0
gosong43_박정순	7	2007-10-08	09:54:00	115	63	3	594	4914	-2.72316	-6.81281	235	-9	-16	0	0
gosong43_박정순	8	2007-10-08	21:28:00	129	72	3	1288	5608	12.2662	2.3522	694	14	9	0	0
gosong43_박정순	9	2007-10-09	06:08:00	124	75	4	368	6128	8.00754	5.47584	520	-5	3	0	0
gosong43_박정순	10	2007-10-09	12:11:00	101	68	4	731	6491	-14.475	-1.43785	363	-23	-7	0	0
gosong43_박정순	11	2007-10-09	17:56:00	130	75	4	1076	6836	15.0169	5.64418	345	29	7	0	0
gosong43_박정순	12	2007-10-09	21:37:00	102	64	4	1297	7057	-12.6681	-5.30328	221	-28	-11	0	0
gosong43_박정순	13	2007-10-10	07:55:00	113	67	5	475	7675	-0.787031	-2.15634	618	11	3	0	0
Result	nx	reading.date	reading.time	sbp	dbp	day	minutes	time	res.sbp	res.dbp	dtime	dsbp	ddbp	sbp.bi	dbp.bi
gosong44_한계화	1	2007-11-19	14:09:00	144	83	0	849	849	7.7013	3.69277	NA	NA	NA	1	0
gosong44_한계화	2	2007-11-19	21:51:00	117	70	0	1311	1311	-20.1465	-9.38021	462	-27	-13	0	0
gosong44_한계화	3	2007-11-19	21:53:00	127	74	0	1313	1313	-10.1502	-5.38052	2	10	4	0	0
gosong44_한계화	4	2007-11-20	08:08:00	151	85	1	488	1928	12.7213	5.52233	615	24	11	1	1
gosong44_한계화	5	2007-11-20	08:12:00	147	86	1	492	1932	8.71392	6.5217	4	-4	1	1	1
gosong44_한계화	6	2007-11-21	07:07:00	151	80	2	427	3307	10.1907	0.304517	1375	4	-6	1	0
gosong44_한계화	7	2007-11-21	07:09:00	138	83	2	429	3309	-2.81297	3.3042	2	-13	3	1	0
gosong44_한계화	8	2007-11-21	21:03:00	152	79	2	1263	4143	9.65658	-0.827532	834	14	-4	1	0
gosong44_한계화	9	2007-11-21	21:06:00	137	76	2	1266	4146	-5.34893	-3.82801	3	-15	-3	1	0
gosong44_한계화	10	2007-11-22	07:47:00	133	80	3	467	4787	-10.5252	0.0707466	641	-4	4	0	0
Result	nx	reading.date	reading.time	sbp	dbp	day	minutes	time	res.sbp	res.dbp	dtime	dsbp	ddbp	sbp.bi	dbp.bi
gosong45_이우자	1	2007-11-01	14:04:00	160	100	0	844	844	13.3558	7.14798	NA	NA	NA	1	1
gosong45_이우자	2	2007-11-01	23:49:00	143	89	0	1429	1429	-2.549	-3.49452	585	-17	-11	1	1
gosong45_이우자	3	2007-11-01	23:50:00	156	97	0	1430	1430	10.4529	4.50609	1	13	8	1	1
gosong45_이우자	4	2007-11-02	06:22:00	137	88	1	382	1822	-7.81323	-4.25435	392	-19	-9	1	1
gosong45_이우자	5	2007-11-02	06:24:00	147	90	1	384	1824	2.19051	-2.25312	2	10	2	1	1
gosong45_이우자	6	2007-11-02	23:41:00	152	91	1	1421	2861	9.13197	-0.619388	1037	5	1	1	1
gosong45_이우자	7	2007-11-02	23:42:00	141	90	1	1422	2862	-1.86616	-1.61878	1	-11	-1	1	1
gosong45_이우자	8	2007-11-03	07:22:00	139	89	2	442	3322	-3.00495	-2.33766	460	-2	-1	1	1
gosong45_이우자	9	2007-11-03	07:23:00	132	96	2	443	3323	-10.0031	4.66295	1	-7	7	0	1
gosong45_이우자	10	2007-11-04	00:51:00	132	93	3	51	4371	-8.04103	2.30341	1048	0	-3	0	1
gosong45_이우자	11	2007-11-04	00:52:00	132	88	3	52	4372	-8.03916	-2.69598	1	0	-5	0	1
gosong45_이우자	12	2007-11-04	06:43:00	137	89	3	403	4723	-2.38203	-1.48148	351	5	1	1	1
gosong45_이우자	13	2007-11-04	06:44:00	136	92	3	404	4724	-3.38015	1.51913	1	-1	3	1	1
gosong45_이우자	14	2007-11-04	23:17:00	140	88	3	1397	5717	2.47893	-1.87402	993	4	-4	1	1
gosong45_이우자	15	2007-11-04	23:18:00	129	88	3	1398	5718	-8.5192	-1.87341	1	-11	0	0	1
gosong45_이우자	16	2007-11-05	06:34:00	128	88	4	394	6154	-8.70293	-1.60696	436	-1	0	0	1
gosong45_이우자	17	2007-11-05	06:35:00	132	81	4	395	6155	-4.70106	-8.60635	1	4	-7	0	0
gosong45_이우자	18	2007-11-05	23:15:00	153	98	4	1395	7155	18.1711	9.00477	1000	21	17	1	1
gosong45_이우자	19	2007-11-05	23:16:00	148	95	4	1396	7156	13.173	6.00539	1	-5	-3	1	1
gosong45_이우자	20	2007-11-06	06:50:00	132	89	5	410	7610	-1.97703	0.282836	454	-16	-6	0	1
gosong45_이우자	21	2007-11-06	06:51:00	136	86	5	411	7611	2.02484	-2.71655	1	4	-3	1	1
Result	nx	reading.date	reading.time	sbp	dbp	day	minutes	time	res.sbp	res.dbp	dtime	dsbp	ddbp	sbp.bi	dbp.bi
gosong46_이영란	1	2007-09-19	14:16:00	122	72	0	856	856	10.5952	5.60419	NA	NA	NA	0	0
gosong46_이영란	2	2007-09-19	19:23:00	121	68	0	1163	1163	9.43473	1.42236	307	-1	-4	0	0
gosong46_이영란	3	2007-09-19	21:23:00	112	67	0	1283	1283	0.372001	0.351291	120	-9	-1	0	0
gosong46_이영란	4	2007-09-20	07:01:00	108	68	1	421	1861	-3.93014	1.00897	578	-4	1	0	0
gosong46_이영란	5	2007-09-20	08:02:00	112	67	1	482	1922	0.0379706	-0.0271617	61	4	-1	0	0
gosong46_이영란	6	2007-09-20	17:37:00	114	72	1	1057	2497	1.7374	4.63229	575	2	5	0	0
gosong46_이영란	7	2007-09-21	09:14:00	118	72	2	554	3434	5.24759	4.07734	937	4	0	0	0
gosong46_이영란	8	2007-09-21	20:40:00	71	40	2	1240	4120	-42.111	-28.3289	686	-47	-32	0	0
gosong46_이영란	9	2007-09-22	06:41:00	107	61	3	401	4721	-6.42518	-7.68489	601	36	21	0	0
gosong46_이영란	10	2007-09-22	09:24:00	115	73	3	564	4884	1.48962	4.21857	163	8	12	0	0
gosong46_이영란	11	2007-09-22	21:28:00	115	78	3	1288	5608	1.11115	8.78977	724	0	5	0	0
gosong46_이영란	12	2007-09-23	10:14:00	122	72	4	614	6374	7.71074	2.3361	766	7	-6	0	0
gosong46_이영란	13	2007-09-24	06:50:00	105	62	5	410	7610	-9.93537	-8.39593	1236	-17	-10	0	0
gosong46_이영란	14	2007-09-24	11:41:00	122	70	5	701	7901	6.91251	-0.568275	291	17	8	0	0
gosong46_이영란	15	2007-09-24	21:15:00	115	73	5	1275	8475	-0.387537	2.09177	574	-7	3	0	0
gosong46_이영란	16	2007-09-25	05:56:00	126	81	6	356	8996	10.3401	9.7832	521	11	8	0	0
gosong46_이영란	17	2007-09-25	11:53:00	128	66	6	713	9353	12.1535	-5.42823	357	2	-15	0	0
gosong46_이영란	18	2007-09-25	19:22:00	125	76	6	1162	9802	8.91879	4.30584	449	-3	10	0	0
gosong46_이영란	19	2007-09-25	21:35:00	125	76	6	1295	9935	8.84926	4.22707	133	0	0	0	0
gosong46_이영란	20	2007-09-26	07:13:00	107	72	7	433	10513	-9.45288	-0.115255	578	-18	-4	0	0
gosong46_이영란	21	2007-09-26	09:32:00	113	76	7	572	10652	-3.52554	3.80242	139	6	4	0	0
gosong46_이영란	22	2007-09-26	18:56:00	120	77	7	1136	11216	3.17964	4.46839	564	7	1	0	0
gosong46_이영란	23	2007-09-26	20:32:00	122	72	7	1232	11312	5.12945	-0.588469	96	2	-5	0	0
gosong46_이영란	24	2007-09-27	07:31:00	101	66	8	451	11971	-16.215	-6.97877	659	-21	-6	0	0
gosong46_이영란	25	2007-09-27	08:13:00	116	70	8	493	12013	-1.23699	-3.00364	42	15	4	0	0
Result	nx	reading.date	reading.time	sbp	dbp	day	minutes	time	res.sbp	res.dbp	dtime	dsbp	ddbp	sbp.bi	dbp.bi
gosong47_김영림	1	2007-09-28	14:40:00	126	98	0	880	880	3.36381	14.3693	NA	NA	NA	0	1
gosong47_김영림	2	2007-09-28	14:42:00	142	96	0	882	882	19.3653	12.372	2	16	-2	1	1
gosong47_김영림	3	2007-09-28	20:18:00	108	69	0	1218	1218	-14.3842	-14.1835	336	-34	-27	0	0
gosong47_김영림	4	2007-09-29	06:30:00	113	76	1	390	1830	-8.92795	-6.37379	612	5	7	0	0
gosong47_김영림	5	2007-09-29	11:46:00	131	85	1	706	2146	9.30764	3.04428	316	18	9	0	1
gosong47_김영림	6	2007-09-29	18:26:00	119	76	1	1106	2546	-2.39416	-5.42651	400	-12	-9	0	0
gosong47_김영림	7	2007-09-29	21:48:00	104	72	1	1308	2748	-17.2436	-9.15925	202	-15	-4	0	0
gosong47_김영림	8	2007-09-30	06:49:00	116	83	2	409	3289	-4.84023	2.5565	541	12	11	0	0
gosong47_김영림	9	2007-09-30	08:22:00	116	80	2	502	3382	-4.7709	-0.320455	93	0	-3	0	0
gosong47_김영림	10	2007-09-30	19:16:00	129	88	2	1156	4036	8.71667	8.54481	654	13	8	0	1
gosong47_김영림	11	2007-09-30	22:02:00	120	75	2	1322	4202	-0.159577	-4.23557	166	-9	-13	0	0
gosong47_김영림	12	2007-10-01	06:35:00	116	70	3	395	4715	-3.77713	-8.55686	513	-4	-5	0	0
gosong47_김영림	13	2007-10-01	20:19:00	127	72	3	1219	5539	7.83718	-5.46668	824	11	2	0	0
gosong47_김영림	14	2007-10-01	22:38:00	124	78	3	1358	5678	4.94081	0.717217	139	-3	6	0	0
gosong47_김영림	15	2007-10-02	06:40:00	127	82	4	400	6160	8.30015	5.35492	482	3	4	0	0
gosong47_김영림	16	2007-10-02	07:59:00	134	77	4	479	6239	15.359	0.459436	79	7	-5	0	0
gosong47_김영림	17	2007-10-02	21:37:00	133	88	4	1297	7057	14.9689	12.5417	818	-1	11	0	1
gosong47_김영림	18	2007-10-02	21:39:00	109	76	4	1299	7059	-9.02963	0.544319	2	-24	-12	0	0
gosong47_김영림	19	2007-10-02	23:26:00	103	64	4	1406	7166	-14.9499	-11.3141	107	-6	-12	0	0
gosong47_김영림	20	2007-10-03	06:58:00	108	81	5	418	7618	-9.61289	6.28389	452	5	17	0	0
gosong47_김영림	21	2007-10-03	19:07:00	115	72	5	1147	8347	-2.0694	-1.75162	729	7	-9	0	0
Result	nx	reading.date	reading.time	sbp	dbp	day	minutes	time	res.sbp	res.dbp	dtime	dsbp	ddbp	sbp.bi	dbp.bi
gosong48_박정자1	1	2007-10-25	14:07:00	128	73	0	847	847	-6.02995	-2.54856	NA	NA	NA	0	0
gosong48_박정자1	2	2007-10-25	14:09:00	123	75	0	849	849	-11.0285	-0.550654	2	-5	2	0	0
gosong48_박정자1	3	2007-10-25	22:23:00	134	81	0	1343	1343	0.332755	4.93161	494	11	6	0	0
gosong48_박정자1	4	2007-10-25	22:29:00	164	86	0	1349	1349	30.3371	9.92532	6	30	5	1	1
gosong48_박정자1	5	2007-10-25	22:32:00	138	80	0	1352	1352	4.33934	3.92218	3	-26	-6	1	0
gosong48_박정자1	6	2007-10-26	06:05:00	147	70	1	365	1805	13.6706	-6.55259	453	9	-10	1	0
gosong48_박정자1	7	2007-10-26	06:08:00	129	80	1	368	1808	-4.32721	3.44427	3	-18	10	0	0
gosong48_박정자1	8	2007-10-26	22:45:00	127	80	1	1365	2805	-5.59815	2.39936	997	-2	0	0	0
gosong48_박정자1	9	2007-10-26	22:47:00	114	63	1	1367	2807	-18.5967	-14.6027	2	-13	-17	0	0
gosong48_박정자1	10	2007-10-27	07:25:00	132	74	2	445	3325	-0.217894	-4.14562	518	18	11	0	0
gosong48_박정자1	11	2007-10-27	07:28:00	127	70	2	448	3328	-5.2157	-8.14877	3	-5	-4	0	0
gosong48_박정자1	12	2007-10-28	06:06:00	125	84	3	366	4686	-6.22265	4.42798	1358	-2	14	0	0
gosong48_박정자1	13	2007-10-28	06:09:00	121	76	3	369	4689	-10.2205	-3.57516	3	-4	-8	0	0
gosong48_박정자1	14	2007-10-29	07:01:00	141	81	4	421	6181	10.8706	-0.138852	1492	20	5	1	0
gosong48_박정자1	15	2007-10-29	07:03:00	134	104	4	423	6183	3.87204	22.8591	2	-7	23	0	1
gosong48_박정자1	16	2007-10-29	23:22:00	140	88	4	1402	7162	10.5879	5.83301	979	6	-16	1	1
gosong48_박정자1	17	2007-10-29	23:24:00	137	71	4	1404	7164	7.5894	-11.1691	2	-3	-17	1	0
gosong48_박정자1	18	2007-10-30	07:07:00	124	86	5	427	7627	-5.07203	3.34567	463	-13	15	0	1
gosong48_박정자1	19	2007-10-30	07:09:00	120	73	5	429	7629	-9.07057	-9.65643	2	-4	-13	0	0
Result	nx	reading.date	reading.time	sbp	dbp	day	minutes	time	res.sbp	res.dbp	dtime	dsbp	ddbp	sbp.bi	dbp.bi
gosong49_이완직	1	2007-09-19	17:55:00	104	73	0	1075	1075	-10.1507	-2.13089	NA	NA	NA	0	0
gosong49_이완직	2	2007-09-19	23:09:00	112	75	0	1389	1389	-2.22869	0.0184215	314	8	2	0	0
gosong49_이완직	3	2007-09-20	06:31:00	116	76	1	391	1831	1.66154	1.2286	442	4	1	0	0
gosong49_이완직	4	2007-09-20	09:03:00	102	68	1	543	1983	-12.3762	-6.69913	152	-14	-8	0	0
gosong49_이완직	5	2007-09-20	21:04:00	131	79	1	1264	2704	16.4447	4.64371	721	29	11	0	0
gosong49_이완직	6	2007-09-20	23:31:00	117	76	1	1411	2851	2.40823	1.71361	147	-14	-3	0	0
gosong49_이완직	7	2007-09-21	06:16:00	119	80	2	376	3256	4.30765	5.9062	405	2	4	0	0
gosong49_이완직	8	2007-09-21	09:23:00	113	68	2	563	3443	-1.73879	-6.00488	187	-6	-12	0	0
gosong49_이완직	9	2007-09-21	19:33:00	112	72	2	1173	4053	-2.89028	-1.71482	610	-1	4	0	0
gosong49_이완직	10	2007-09-21	23:01:00	136	84	2	1381	4261	21.0581	10.3841	208	24	12	1	0
gosong49_이완직	11	2007-09-22	06:25:00	118	80	3	385	4705	2.9478	6.59521	444	-18	-4	0	0
gosong49_이완직	12	2007-09-22	07:52:00	104	63	3	472	4792	-11.0738	-10.3634	87	-14	-17	0	0
gosong49_이완직	13	2007-09-22	19:54:00	119	71	3	1194	5514	3.74689	-2.02011	722	15	8	0	0
gosong49_이완직	14	2007-09-22	22:50:00	112	69	3	1370	5690	-3.29682	-3.93642	176	-7	-2	0	0
gosong49_이완직	15	2007-09-23	07:26:00	111	76	4	446	6206	-4.42496	3.30894	516	-1	7	0	0
gosong49_이완직	16	2007-09-23	20:40:00	114	72	4	1240	7000	-1.62215	-0.313502	794	3	-4	0	0
gosong49_이완직	17	2007-09-24	06:32:00	118	73	5	392	7592	2.23083	0.967999	592	4	1	0	0
gosong49_이완직	18	2007-09-24	22:15:00	111	70	5	1335	8535	-5.00335	-1.5836	943	-7	-3	0	0
Result	nx	reading.date	reading.time	sbp	dbp	day	minutes	time	res.sbp	res.dbp	dtime	dsbp	ddbp	sbp.bi	dbp.bi
gosong50_심옥화	1	2007-11-01	14:02:00	134	80	0	842	842	-4.78749	-5.59405	NA	NA	NA	0	0
gosong50_심옥화	2	2007-11-01	19:58:00	136	87	0	1198	1198	-2.35765	1.36243	356	2	7	1	1
gosong50_심옥화	3	2007-11-01	20:00:00	126	81	0	1200	1200	-12.3552	-4.63781	2	-10	-6	0	0
gosong50_심옥화	4	2007-11-02	06:13:00	146	89	1	373	1813	8.38492	3.28725	613	20	8	1	1
gosong50_심옥화	5	2007-11-02	06:15:00	138	88	1	375	1815	0.387333	2.28701	2	-8	-1	1	1
gosong50_심옥화	6	2007-11-02	20:34:00	116	76	1	1234	2674	-20.5755	-9.818	859	-22	-12	0	0
gosong50_심옥화	7	2007-11-03	06:08:00	160	96	2	368	3248	24.1176	10.1118	574	44	20	1	1
gosong50_심옥화	8	2007-11-03	06:11:00	146	89	2	371	3251	10.1212	3.11147	3	-14	-7	1	1
gosong50_심옥화	9	2007-11-03	19:17:00	144	91	2	1157	4037	9.07022	5.01539	786	-2	2	1	1
gosong50_심옥화	10	2007-11-03	19:18:00	133	89	2	1158	4038	-1.92857	3.01527	1	-11	-2	0	1
gosong50_심옥화	11	2007-11-04	06:13:00	136	84	3	373	4693	1.86229	-2.0648	655	3	-5	1	0
gosong50_심옥화	12	2007-11-04	06:15:00	130	80	3	375	4695	-4.1353	-6.06505	2	-6	-4	0	0
gosong50_심옥화	13	2007-11-05	05:43:00	140	101	4	343	6103	7.56475	14.7628	1408	10	21	1	1
gosong50_심옥화	14	2007-11-05	05:45:00	140	86	4	345	6105	7.56717	-0.237406	2	0	-15	1	1
gosong50_심옥화	15	2007-11-05	21:13:00	124	80	4	1273	7033	-7.31235	-6.35085	928	-16	-6	0	0
gosong50_심옥화	16	2007-11-05	21:15:00	115	76	4	1275	7035	-16.3099	-10.3511	2	-9	-4	0	0
gosong50_심옥화	17	2007-11-06	06:15:00	128	87	5	375	7575	-2.65793	0.5829	540	13	11	0	1
gosong50_심옥화	18	2007-11-06	06:17:00	134	88	5	377	7577	3.34449	1.58266	2	6	1	0	1
Result	nx	reading.date	reading.time	sbp	dbp	day	minutes	time	res.sbp	res.dbp	dtime	dsbp	ddbp	sbp.bi	dbp.bi
gosong51_변옥순	1	2007-09-28	14:40:00	135	88	0	880	880	-4.39401	-1.85756	NA	NA	NA	1	1
gosong51_변옥순	2	2007-09-28	21:05:00	172	101	0	1265	1265	34.253	11.8378	385	37	13	1	1
gosong51_변옥순	3	2007-09-29	06:16:00	136	94	1	376	1816	0.610229	5.83304	551	-36	-7	1	1
gosong51_변옥순	4	2007-09-29	08:49:00	128	80	1	529	1969	-6.73523	-7.89062	153	-8	-14	0	0
gosong51_변옥순	5	2007-09-29	18:26:00	140	100	1	1106	2546	7.73319	13.1516	577	12	20	1	1
gosong51_변옥순	6	2007-09-29	21:28:00	131	91	1	1288	2728	-0.488204	4.48028	182	-9	-9	0	1
gosong51_변옥순	7	2007-09-30	06:21:00	116	78	2	381	3261	-13.208	-7.55702	533	-15	-13	0	0
gosong51_변옥순	8	2007-09-30	08:54:00	120	73	2	534	3414	-8.55347	-12.2807	153	4	-5	0	0
gosong51_변옥순	9	2007-09-30	18:41:00	110	78	2	1121	4001	-16.0423	-6.22043	587	-10	5	0	0
gosong51_변옥순	10	2007-09-30	22:37:00	132	92	2	1357	4237	6.96735	8.20583	236	22	14	0	1
gosong51_변옥순	11	2007-10-01	06:53:00	115	76	3	413	4733	-7.91074	-6.8983	496	-17	-16	0	0
gosong51_변옥순	12	2007-10-01	09:04:00	130	81	3	544	4864	7.64968	-1.66169	131	15	5	0	0
gosong51_변옥순	13	2007-10-02	08:53:00	120	81	4	533	6293	3.76299	0.919357	1429	-10	0	0	0
gosong51_변옥순	14	2007-10-02	11:34:00	99	70	4	694	6454	-16.5482	-9.78985	161	-21	-11	0	0
gosong51_변옥순	15	2007-10-02	20:43:00	98	71	4	1243	7003	-15.1996	-7.79825	549	-1	1	0	0
gosong51_변옥순	16	2007-10-03	19:09:00	112	81	5	1149	8349	4.55863	4.63289	1346	14	10	0	0
gosong51_변옥순	17	2007-10-04	06:47:00	128	88	6	407	9047	23.5447	12.8936	698	16	7	0	1
Result	nx	reading.date	reading.time	sbp	dbp	day	minutes	time	res.sbp	res.dbp	dtime	dsbp	ddbp	sbp.bi	dbp.bi
gosong52_정종태	1	2007-10-05	08:49:00	121	80	0	529	529	-9.56058	-3.45473	NA	NA	NA	0	0
gosong52_정종태	2	2007-10-05	11:38:00	124	84	0	698	698	-6.75262	0.413429	169	3	4	0	0
gosong52_정종태	3	2007-10-05	18:36:00	130	84	0	1116	1116	-1.2276	0.0873461	418	6	0	0	0
gosong52_정종태	4	2007-10-05	23:26:00	134	79	0	1406	1406	2.44287	-5.13888	290	4	-5	0	0
gosong52_정종태	5	2007-10-06	06:21:00	145	100	1	381	1821	12.9713	15.5374	415	11	21	1	1
gosong52_정종태	6	2007-10-06	09:22:00	132	85	1	562	2002	-0.234384	0.396175	181	-13	-15	0	1
gosong52_정종태	7	2007-10-06	19:39:00	152	88	1	1179	2619	19.0645	2.91485	617	20	3	1	1
gosong52_정종태	8	2007-10-06	22:56:00	125	84	1	1376	2816	-8.15935	-1.23883	197	-27	-4	0	0
gosong52_정종태	9	2007-10-07	07:52:00	140	89	2	472	3352	6.23158	3.34304	536	15	5	1	1
gosong52_정종태	10	2007-10-07	09:47:00	126	78	2	587	3467	-7.8991	-7.74668	115	-14	-11	0	0
gosong52_정종태	11	2007-10-07	20:10:00	128	84	2	1210	4090	-6.60703	-2.23268	623	2	6	0	0
gosong52_정종태	12	2007-10-07	22:43:00	135	80	2	1363	4243	0.219112	-6.35204	153	7	-4	1	0
gosong52_정종태	13	2007-10-08	07:04:00	141	84	3	424	4744	5.64981	-2.74287	501	6	4	1	0
gosong52_정종태	14	2007-10-08	08:40:00	133	87	3	520	4840	-2.45927	0.182242	96	-8	3	0	1
gosong52_정종태	15	2007-10-08	21:31:00	134	86	3	1291	5611	-2.33538	-1.41922	771	1	-1	0	1
gosong52_정종태	16	2007-10-08	23:10:00	143	94	3	1390	5710	6.55212	6.50355	99	9	8	1	1
gosong52_정종태	17	2007-10-09	07:10:00	137	92	4	430	6190	0.00668776	4.1291	480	-6	-2	1	1
gosong52_정종태	18	2007-10-09	09:04:00	126	80	4	544	6304	-11.1229	-7.95983	114	-11	-12	0	0
gosong52_정종태	19	2007-10-09	21:41:00	138	86	4	1301	7061	0.0169489	-2.55037	757	12	6	1	1
gosong52_정종태	20	2007-10-09	23:59:00	146	96	4	1439	7199	7.86014	7.34198	138	8	10	1	1
gosong52_정종태	21	2007-10-10	07:34:00	134	89	5	454	7654	-4.65689	-0.0129678	455	-12	-7	0	1
Result	nx	reading.date	reading.time	sbp	dbp	day	minutes	time	res.sbp	res.dbp	dtime	dsbp	ddbp	sbp.bi	dbp.bi
gosong53_한점일	1	2007-10-05	09:30:00	154	82	0	570	570	19.0778	0.0693329	NA	NA	NA	1	0
gosong53_한점일	2	2007-10-05	18:23:00	127	79	0	1103	1103	-7.49537	-2.71711	533	-27	-3	0	0
gosong53_한점일	3	2007-10-05	21:06:00	128	75	0	1266	1266	-6.36483	-6.65179	163	1	-4	0	0
gosong53_한점일	4	2007-10-06	05:52:00	120	88	1	352	1792	-13.9436	6.55896	526	-8	13	0	1
gosong53_한점일	5	2007-10-06	06:42:00	138	92	1	402	1842	4.09649	10.579	50	18	4	1	1
gosong53_한점일	6	2007-10-06	19:21:00	130	82	1	1161	2601	-3.29564	0.883111	759	-8	-10	0	0
gosong53_한점일	7	2007-10-07	07:09:00	131	71	2	429	3309	-1.7286	-9.83321	708	1	-11	0	0
gosong53_한점일	8	2007-10-07	11:51:00	150	88	2	711	3591	17.4972	7.27978	282	19	17	1	1
gosong53_한점일	9	2007-10-07	17:31:00	116	77	2	1051	3931	-16.2304	-3.58399	340	-34	-11	0	0
gosong53_한점일	10	2007-10-08	07:43:00	132	77	3	463	4783	0.451913	-3.24261	852	16	0	0	0
gosong53_한점일	11	2007-10-08	16:24:00	132	74	3	984	5304	0.869178	-6.03385	521	0	-3	0	0
gosong53_한점일	12	2007-10-09	07:43:00	139	83	4	463	6223	8.6052	3.33437	919	7	9	1	0
gosong53_한점일	13	2007-10-09	09:22:00	139	80	4	562	6322	8.68449	0.374036	99	0	-3	1	0
gosong53_한점일	14	2007-10-09	14:05:00	132	81	4	845	6605	1.91114	1.48743	283	-7	1	0	0
gosong53_한점일	15	2007-10-09	20:47:00	127	76	4	1247	7007	-2.7669	-3.3515	402	-5	-5	0	0
gosong53_한점일	16	2007-10-10	05:05:00	120	84	5	305	7505	-9.36806	4.84804	498	-7	8	0	0
Result	nx	reading.date	reading.time	sbp	dbp	day	minutes	time	res.sbp	res.dbp	dtime	dsbp	ddbp	sbp.bi	dbp.bi
gosong54_김경분	1	2007-09-19	14:16:00	132	92	0	856	856	12.2108	7.39659	NA	NA	NA	0	1
gosong54_김경분	2	2007-09-19	21:30:00	119	80	0	1290	1290	-0.292963	-4.3927	434	-13	-12	0	0
gosong54_김경분	3	2007-09-20	06:01:00	108	80	1	361	1801	-10.7087	-4.14462	511	-11	0	0	0
gosong54_김경분	4	2007-09-20	09:57:00	123	86	1	597	2037	4.56113	1.96996	236	15	6	0	1
gosong54_김경분	5	2007-09-20	12:48:00	119	86	1	768	2208	0.756651	2.05298	171	-4	0	0	1
gosong54_김경분	6	2007-09-20	22:11:00	128	88	1	1331	2771	10.4004	4.32631	563	9	2	0	1
gosong54_김경분	7	2007-09-21	08:03:00	112	80	2	483	3363	-4.92276	-3.38628	592	-16	-8	0	0
gosong54_김경분	8	2007-09-21	13:19:00	111	89	2	799	3679	-5.56145	5.76714	316	-1	9	0	1
gosong54_김경분	9	2007-09-21	22:24:00	117	77	2	1344	4224	1.06169	-5.96827	545	6	-12	0	0
gosong54_김경분	10	2007-09-22	05:34:00	112	84	3	334	4654	-3.44667	1.24049	430	-5	7	0	0
gosong54_김경분	11	2007-09-22	22:20:00	103	76	3	1340	5660	-11.2964	-6.2711	1006	-9	-8	0	0
gosong54_김경분	12	2007-09-23	08:48:00	114	78	4	528	6288	0.421601	-3.96621	628	11	2	0	0
gosong54_김경분	13	2007-09-23	19:36:00	113	82	4	1176	6936	0.162505	0.348386	648	-1	4	0	0
gosong54_김경분	14	2007-09-24	06:23:00	108	78	5	383	7583	-4.09773	-3.3375	647	-5	-4	0	0
gosong54_김경분	15	2007-09-24	18:11:00	110	82	5	1091	8291	-1.28823	1.00623	708	2	4	0	0
gosong54_김경분	16	2007-09-24	22:50:00	106	77	5	1370	8570	-4.96923	-3.85832	279	-4	-5	0	0
gosong54_김경분	17	2007-09-25	05:48:00	114	90	6	348	8988	3.5087	9.34462	418	8	13	0	1
gosong54_김경분	18	2007-09-25	10:19:00	113	81	6	619	9259	2.81855	0.476185	271	-1	-9	0	0
gosong54_김경분	19	2007-09-25	13:58:00	113	77	6	838	9478	3.06895	-3.41749	219	0	-4	0	0
gosong54_김경분	20	2007-09-25	21:54:00	117	85	6	1314	9954	7.6132	4.8136	476	4	8	0	1
Result	nx	reading.date	reading.time	sbp	dbp	day	minutes	time	res.sbp	res.dbp	dtime	dsbp	ddbp	sbp.bi	dbp.bi
gosong55_한영숙	1	2007-10-11	11:57:00	128	77	0	717	717	7.24443	5.65581	NA	NA	NA	0	0
gosong55_한영숙	2	2007-10-11	22:24:00	136	74	0	1344	1344	15.5178	2.86565	627	8	-3	1	0
gosong55_한영숙	3	2007-10-11	22:25:00	120	76	0	1345	1345	-0.481751	4.86599	1	-16	2	0	0
gosong55_한영숙	4	2007-10-12	06:34:00	114	72	1	394	1834	-6.26854	1.02965	489	-6	-4	0	0
gosong55_한영숙	5	2007-10-12	06:36:00	117	70	1	396	1836	-3.26767	-0.969685	2	3	-2	0	0
gosong55_한영숙	6	2007-10-12	20:29:00	127	72	1	1229	2669	7.09554	1.3091	833	10	2	0	0
gosong55_한영숙	7	2007-10-12	20:31:00	123	73	1	1231	2671	3.09641	2.30977	2	-4	1	0	0
gosong55_한영숙	8	2007-10-13	07:10:00	93	57	2	430	3310	-26.625	-13.4764	639	-30	-16	0	0
gosong55_한영숙	9	2007-10-13	07:11:00	108	62	2	431	3311	-11.6245	-8.47604	1	15	5	0	0
gosong55_한영숙	10	2007-10-13	22:57:00	130	61	2	1377	4257	10.7879	-9.15943	946	22	-1	0	0
gosong55_한영숙	11	2007-10-13	22:58:00	118	70	2	1378	4258	-1.21163	-0.159097	1	-12	9	0	0
gosong55_한영숙	12	2007-10-14	06:54:00	113	66	3	414	4734	-6.00409	-3.99979	476	-5	-4	0	0
gosong55_한영숙	13	2007-10-14	06:55:00	116	66	3	415	4735	-3.00365	-3.99946	1	3	0	0	0
gosong55_한영숙	14	2007-10-14	23:15:00	121	84	3	1395	5715	2.42364	14.3285	980	5	18	0	0
gosong55_한영숙	15	2007-10-14	23:17:00	124	75	3	1397	5717	5.42452	5.3292	2	3	-9	0	0
gosong55_한영숙	16	2007-10-15	07:43:00	116	69	4	463	6223	-2.35486	-0.501456	506	-8	-6	0	0
gosong55_한영숙	17	2007-10-15	07:45:00	115	70	4	465	6225	-3.35399	0.499213	2	-1	1	0	0
gosong55_한영숙	18	2007-10-15	23:15:00	127	74	4	1395	7155	9.05151	4.81046	930	12	4	0	0
gosong55_한영숙	19	2007-10-15	23:17:00	135	77	4	1397	7157	17.0524	7.81113	2	8	3	1	0
gosong55_한영숙	20	2007-10-16	06:51:00	113	63	5	411	7611	-4.74967	-6.03692	454	-22	-14	0	0
gosong55_한영숙	21	2007-10-16	06:53:00	109	65	5	413	7613	-8.7488	-4.03626	2	-4	2	0	0
Result	nx	reading.date	reading.time	sbp	dbp	day	minutes	time	res.sbp	res.dbp	dtime	dsbp	ddbp	sbp.bi	dbp.bi
gosong56_이상교	1	2007-09-28	20:37:00	161	100	0	1237	1237	-12.699	-5.94875	NA	NA	NA	1	1
gosong56_이상교	2	2007-09-28	21:18:00	165	108	0	1278	1278	-8.6272	2.02714	41	4	8	1	1
gosong56_이상교	3	2007-09-29	06:14:00	197	120	1	374	1814	24.3112	13.7119	536	32	12	1	1
gosong56_이상교	4	2007-09-29	08:49:00	198	108	1	529	1969	25.5826	1.62077	155	1	-12	1	1
gosong56_이상교	5	2007-09-29	19:20:00	145	94	1	1160	2600	-26.3126	-12.7503	631	-53	-14	1	1
gosong56_이상교	6	2007-09-29	21:28:00	168	111	1	1288	2728	-3.08855	4.1744	128	23	17	1	1
gosong56_이상교	7	2007-09-30	06:12:00	179	114	2	372	3252	8.82887	6.86624	524	11	3	1	1
gosong56_이상교	8	2007-09-30	18:39:00	160	98	2	1119	3999	-8.86328	-9.57307	747	-19	-16	1	1
gosong56_이상교	9	2007-09-30	23:01:00	149	92	2	1381	4261	-19.4046	-15.7272	262	-11	-6	1	1
gosong56_이상교	10	2007-10-01	07:59:00	174	112	3	479	4799	6.53736	3.95645	538	25	20	1	1
gosong56_이상교	11	2007-10-01	09:04:00	165	109	3	544	4864	-2.34884	0.918227	65	-9	-3	1	1
gosong56_이상교	12	2007-10-01	19:13:00	183	120	3	1153	5473	16.7174	11.5601	609	18	11	1	1
gosong56_이상교	13	2007-10-02	06:25:00	168	114	4	385	6145	2.89393	5.16488	672	-15	-6	1	1
gosong56_이상교	14	2007-10-02	08:54:00	173	107	4	534	6294	8.1548	-1.92275	149	5	-7	1	1
gosong56_이상교	15	2007-10-02	20:43:00	157	104	4	1243	7003	-6.60388	-5.33971	709	-16	-3	1	1
gosong56_이상교	16	2007-10-03	19:09:00	148	109	5	1149	8349	-13.2473	-1.13129	1346	-9	5	1	1
gosong56_이상교	17	2007-10-04	08:38:00	168	113	6	518	9158	8.16909	2.39294	809	20	4	1	1
Result	nx	reading.date	reading.time	sbp	dbp	day	minutes	time	res.sbp	res.dbp	dtime	dsbp	ddbp	sbp.bi	dbp.bi
gosong57_맹주문	1	2008-01-03	10:38:00	120	82	0	638	638	-1.94976	3.3901	NA	NA	NA	0	0
gosong57_맹주문	2	2008-01-04	01:15:00	136	81	1	75	1515	13.6632	0.897273	877	16	-1	1	0
gosong57_맹주문	3	2008-01-04	01:17:00	121	79	1	77	1517	-1.33773	-1.10613	2	-15	-2	0	0
gosong57_맹주문	4	2008-01-04	08:09:00	125	85	1	489	1929	2.48042	4.19256	412	4	6	0	1
gosong57_맹주문	5	2008-01-04	08:10:00	122	84	1	490	1930	-0.52002	3.19086	1	-3	-1	0	0
gosong57_맹주문	6	2008-01-05	01:20:00	124	84	2	80	2960	1.02536	1.43759	1030	2	0	0	0
gosong57_맹주문	7	2008-01-05	01:22:00	124	81	2	82	2962	1.02448	-1.56581	2	0	-3	0	0
gosong57_맹주문	8	2008-01-05	08:24:00	116	80	2	504	3384	-7.16178	-3.28414	422	-8	-1	0	0
gosong57_맹주문	9	2008-01-05	08:25:00	120	78	2	505	3385	-3.16222	-5.28584	1	4	-2	0	0
gosong57_맹주문	10	2008-01-06	00:54:00	121	80	3	54	4374	-2.59874	-4.96932	989	1	2	0	0
gosong57_맹주문	11	2008-01-06	00:56:00	118	82	3	56	4376	-5.59963	-2.97272	2	-3	2	0	0
gosong57_맹주문	12	2008-01-06	08:18:00	125	84	3	498	4818	1.20528	-1.72509	442	7	2	0	0
gosong57_맹주문	13	2008-01-06	08:20:00	116	84	3	500	4820	-7.7956	-1.7285	2	-9	0	0	0
gosong57_맹주문	14	2008-01-07	00:38:00	130	91	4	38	5798	5.77274	3.60675	978	14	7	0	1
gosong57_맹주문	15	2008-01-07	00:40:00	125	88	4	40	5800	0.771853	0.603345	2	-5	-3	0	1
gosong57_맹주문	16	2008-01-07	08:42:00	120	89	4	522	6282	-4.44089	0.782884	482	-5	1	0	1
gosong57_맹주문	17	2008-01-07	08:44:00	118	84	4	524	6284	-6.44177	-4.22052	2	-2	-5	0	0
gosong57_맹주문	18	2008-01-08	01:29:00	140	99	5	89	7289	15.1146	9.06877	1005	22	15	1	1
gosong57_맹주문	19	2008-01-08	01:30:00	134	94	5	90	7290	9.1142	4.06707	1	-6	-5	0	1
gosong57_맹주문	20	2008-01-08	08:54:00	123	91	5	534	7734	-2.08177	0.311289	444	-11	-3	0	1
gosong57_맹주문	21	2008-01-08	08:55:00	118	86	5	535	7735	-7.08221	-4.69041	1	-5	-5	0	1
Result	nx	reading.date	reading.time	sbp	dbp	day	minutes	time	res.sbp	res.dbp	dtime	dsbp	ddbp	sbp.bi	dbp.bi
gosong58_박태성	1	2007-10-17	17:35:00	117	72	0	1055	1055	-0.414846	-3.62108	NA	NA	NA	0	0
gosong58_박태성	2	2007-10-17	23:57:00	113	76	0	1437	1437	-4.59911	0.290057	382	-4	4	0	0
gosong58_박태성	3	2007-10-17	23:58:00	126	76	0	1438	1438	8.40041	0.289825	1	13	0	0	0
gosong58_박태성	4	2007-10-18	06:30:00	118	75	1	390	1830	0.211329	-0.801365	392	-8	-1	0	0
gosong58_박태성	5	2007-10-18	06:32:00	124	83	1	392	1832	6.21036	7.19817	2	6	8	0	0
gosong58_박태성	6	2007-10-18	06:34:00	115	76	1	394	1834	-2.7906	0.197704	2	-9	-7	0	0
gosong58_박태성	7	2007-10-18	22:22:00	112	75	1	1342	2782	-6.24787	-1.02283	948	-3	-1	0	0
gosong58_박태성	8	2007-10-18	22:24:00	120	76	1	1344	2784	1.75116	-0.0232918	2	8	1	0	0
gosong58_박태성	9	2007-10-19	06:49:00	117	73	2	409	3289	-1.49243	-3.14077	505	-3	-3	0	0
gosong58_박태성	10	2007-10-19	06:51:00	120	80	2	411	3291	1.50661	3.85877	2	3	7	0	0
gosong58_박태성	11	2007-10-20	00:36:00	114	71	3	36	4356	-5.0071	-5.38898	1065	-6	-9	0	0
gosong58_박태성	12	2007-10-20	00:38:00	115	69	3	38	4358	-4.00807	-7.38945	2	1	-2	0	0
gosong58_박태성	13	2007-10-20	06:53:00	121	79	3	413	4733	1.81105	2.52332	375	6	10	0	0
gosong58_박태성	14	2007-10-20	06:55:00	132	82	3	415	4735	12.8101	5.52285	2	11	3	0	0
gosong58_박태성	15	2007-10-21	00:26:00	114	81	4	26	5786	-5.69687	4.27836	1051	-18	-1	0	0
gosong58_박태성	16	2007-10-21	00:28:00	116	76	4	28	5788	-3.69783	-0.722105	2	2	-5	0	0
gosong58_박태성	17	2007-10-21	06:42:00	117	74	4	402	6162	-2.87823	-2.80911	374	1	-2	0	0
gosong58_박태성	18	2007-10-21	06:44:00	111	75	4	404	6164	-8.8792	-1.80957	2	-6	1	0	0
gosong58_박태성	19	2007-10-22	01:16:00	121	82	5	76	7276	0.584423	4.93175	1112	10	7	0	0
gosong58_박태성	20	2007-10-22	01:19:00	124	80	5	79	7279	3.58298	2.93105	3	3	-2	0	0
gosong58_박태성	21	2007-10-22	06:52:00	125	76	5	412	7612	4.42235	-1.14642	333	1	-4	0	0
gosong58_박태성	22	2007-10-22	06:54:00	125	73	5	414	7614	4.42139	-4.14688	2	0	-3	0	0
Result	nx	reading.date	reading.time	sbp	dbp	day	minutes	time	res.sbp	res.dbp	dtime	dsbp	ddbp	sbp.bi	dbp.bi
gosong59_박양순	1	2007-09-13	06:03:00	132	92	0	363	363	-0.869392	-0.852828	NA	NA	NA	0	1
gosong59_박양순	2	2007-09-13	12:22:00	123	94	0	742	742	-9.84456	1.0117	379	-9	2	0	1
gosong59_박양순	3	2007-09-13	18:12:00	136	98	0	1092	1092	3.17836	4.88659	350	13	4	1	1
gosong59_박양순	4	2007-09-13	21:20:00	128	86	0	1280	1280	-4.80932	-7.18061	188	-8	-12	0	1
gosong59_박양순	5	2007-09-14	05:45:00	136	92	1	345	1785	3.22376	-1.36113	505	8	6	1	1
gosong59_박양순	6	2007-09-14	08:44:00	136	84	1	524	1964	3.23548	-9.42511	179	0	-8	1	0
gosong59_박양순	7	2007-09-14	17:35:00	148	104	1	1055	2495	15.2703	10.3851	531	12	20	1	1
gosong59_박양순	8	2007-09-14	21:03:00	143	127	1	1263	2703	10.2839	33.3107	208	-5	23	1	1
gosong59_박양순	9	2007-09-15	04:31:00	132	88	2	271	3151	-0.686759	-5.84941	448	-11	-39	0	1
gosong59_박양순	10	2007-09-15	10:00:00	136	73	2	600	3480	3.33479	-20.967	329	4	-15	1	0
gosong59_박양순	11	2007-09-15	18:04:00	118	76	2	1084	3964	-14.6335	-18.14	484	-18	3	0	0
gosong59_박양순	12	2007-09-15	20:59:00	144	107	2	1259	4139	11.378	12.7974	175	26	31	1	1
gosong59_박양순	13	2007-09-16	06:50:00	112	73	3	410	4730	-20.5833	-21.4138	591	-32	-34	0	0
gosong59_박양순	14	2007-09-16	13:39:00	107	95	3	819	5139	-25.5565	0.439964	409	-5	22	0	1
gosong59_박양순	15	2007-09-16	17:36:00	148	114	3	1056	5376	15.459	19.3552	237	41	19	1	1
gosong59_박양순	16	2007-09-16	22:04:00	135	94	3	1324	5644	2.47655	-0.740551	268	-13	-20	1	1
gosong59_박양순	17	2007-09-17	05:22:00	133	105	4	322	6082	0.505241	10.1029	438	-2	11	0	1
gosong59_박양순	18	2007-09-17	08:40:00	132	98	4	520	6280	-0.481788	3.03211	198	-1	-7	0	1
gosong59_박양순	19	2007-09-17	17:12:00	128	81	4	1032	6792	-4.44825	-14.1509	512	-4	-17	0	0
gosong59_박양순	20	2007-09-17	21:22:00	146	100	4	1282	7042	13.5681	4.75973	250	18	19	1	1
Result	nx	reading.date	reading.time	sbp	dbp	day	minutes	time	res.sbp	res.dbp	dtime	dsbp	ddbp	sbp.bi	dbp.bi
gosong60_박정자2	1	2007-10-11	11:57:00	149	90	0	717	717	32.281	10.6506	NA	NA	NA	1	1
gosong60_박정자2	2	2007-10-11	22:06:00	104	72	0	1326	1326	-12.8772	-7.34673	609	-45	-18	0	0
gosong60_박정자2	3	2007-10-11	22:08:00	96	68	0	1328	1328	-20.8778	-11.3467	2	-8	-4	0	0
gosong60_박정자2	4	2007-10-12	08:47:00	122	84	1	527	1967	4.95624	4.6561	639	26	16	0	0
gosong60_박정자2	5	2007-10-12	08:50:00	123	83	1	530	1970	5.95546	3.65611	3	1	-1	0	0
gosong60_박정자2	6	2007-10-12	23:05:00	115	78	1	1385	2825	-2.26665	-1.34012	855	-8	-5	0	0
gosong60_박정자2	7	2007-10-12	23:08:00	108	76	1	1388	2828	-9.26743	-3.34011	3	-7	-2	0	0
gosong60_박정자2	8	2007-10-13	09:28:00	120	80	2	568	3448	2.57151	0.662625	620	12	4	0	0
gosong60_박정자2	9	2007-10-13	09:32:00	117	86	2	572	3452	-0.429528	6.66264	4	-3	6	0	1
gosong60_박정자2	10	2007-10-13	22:36:00	122	84	2	1356	4236	4.36681	4.6661	784	5	-2	0	0
gosong60_박정자2	11	2007-10-13	22:39:00	123	82	2	1359	4239	5.36603	2.66611	3	1	-2	0	0
gosong60_박정자2	12	2007-10-14	09:30:00	102	72	3	570	4890	-15.8031	-7.33102	651	-21	-10	0	0
gosong60_박정자2	13	2007-10-14	09:33:00	107	77	3	573	4893	-10.8039	-2.33101	3	5	5	0	0
gosong60_박정자2	14	2007-10-14	23:14:00	121	77	3	1394	5714	2.98286	-2.32739	821	14	0	0	0
gosong60_박정자2	15	2007-10-14	23:17:00	119	78	3	1397	5717	0.982079	-1.32737	3	-2	1	0	0
gosong60_박정자2	16	2007-10-15	08:00:00	123	77	4	480	6240	4.84622	-2.32507	523	4	-1	0	0
gosong60_박정자2	17	2007-10-15	08:04:00	113	76	4	484	6244	-5.15482	-3.32505	4	-10	-1	0	0
gosong60_박정자2	18	2007-10-15	21:35:00	127	84	4	1295	7055	8.6345	4.67853	811	14	8	0	0
gosong60_박정자2	19	2007-10-15	21:40:00	122	84	4	1300	7060	3.6332	4.67855	5	-5	0	0	0
gosong60_박정자2	20	2007-10-16	09:15:00	118	77	5	555	7755	-0.547346	-2.31839	695	-4	-7	0	0
gosong60_박정자2	21	2007-10-16	09:18:00	120	81	5	558	7758	1.45188	1.68163	3	2	4	0	0
Result	nx	reading.date	reading.time	sbp	dbp	day	minutes	time	res.sbp	res.dbp	dtime	dsbp	ddbp	sbp.bi	dbp.bi
gosong61_김정숙	1	2007-10-05	09:21:00	116	82	0	561	561	-6.70637	0.00236064	NA	NA	NA	0	0
gosong61_김정숙	2	2007-10-05	09:26:00	126	90	0	566	566	3.29402	8.00294	5	10	8	0	1
gosong61_김정숙	3	2007-10-05	09:28:00	128	88	0	568	568	5.29418	6.00318	2	2	-2	0	1
gosong61_김정숙	4	2007-10-05	18:18:00	125	82	0	1098	1098	2.33565	0.0648365	530	-3	-6	0	0
gosong61_김정숙	5	2007-10-05	21:01:00	108	71	0	1261	1261	-14.6516	-10.9162	163	-17	-11	0	0
gosong61_김정숙	6	2007-10-06	05:51:00	124	79	1	351	1791	1.38987	-2.85454	530	16	8	0	0
gosong61_김정숙	7	2007-10-06	06:40:00	123	88	1	400	1840	0.393707	6.15116	49	-1	9	0	1
gosong61_김정숙	8	2007-10-06	20:58:00	120	70	1	1258	2698	-2.53916	-11.749	858	-3	-18	0	0
gosong61_김정숙	9	2007-10-07	07:08:00	134	86	2	428	3308	11.5086	4.32195	610	14	16	0	1
gosong61_김정숙	10	2007-10-07	11:50:00	135	79	2	710	3590	12.5306	-2.64524	282	1	-7	1	0
gosong61_김정숙	11	2007-10-07	17:29:00	113	80	2	1049	3929	-9.44284	-1.6058	339	-22	1	0	0
gosong61_김정숙	12	2007-10-08	07:33:00	120	85	3	453	4773	-2.3768	3.49239	844	7	5	0	1
gosong61_김정숙	13	2007-10-09	07:51:00	136	85	4	471	6231	13.7373	3.66202	1458	16	0	1	1
gosong61_김정숙	14	2007-10-09	09:56:00	115	76	4	596	6356	-7.25294	-5.32344	125	-21	-9	0	0
gosong61_김정숙	15	2007-10-09	20:44:00	120	79	4	1244	7004	-2.20223	-2.24805	648	5	3	0	0
gosong61_김정숙	16	2007-10-10	04:56:00	119	84	5	296	7496	-3.16374	2.80919	492	-1	5	0	0
gosong61_김정숙	17	2007-10-10	08:14:00	120	84	5	494	7694	-2.14825	2.83223	198	1	0	0	0
Result	nx	reading.date	reading.time	sbp	dbp	day	minutes	time	res.sbp	res.dbp	dtime	dsbp	ddbp	sbp.bi	dbp.bi
gosong62_이승범	1	2007-11-19	14:06:00	113	74	0	846	846	-0.00199599	-0.00203583	NA	NA	NA	0	0
gosong62_이승범	2	2007-11-20	06:46:00	113	81	1	406	1846	0.000660017	2.01065	1000	0	7	0	0
gosong62_이승범	3	2007-11-20	06:48:00	114	76	1	408	1848	1.00067	-2.99932	2	1	-5	0	0
gosong62_이승범	4	2007-11-20	06:50:00	112	80	1	410	1850	-0.999329	0.990704	2	-2	4	0	0
Result	nx	reading.date	reading.time	sbp	dbp	day	minutes	time	res.sbp	res.dbp	dtime	dsbp	ddbp	sbp.bi	dbp.bi
gosong63_이응수	1	2007-09-28	15:46:00	123	69	0	946	946	5.21281	1.75973	NA	NA	NA	0	0
gosong63_이응수	2	2007-09-28	22:05:00	111	64	0	1325	1325	-7.05134	-3.89247	379	-12	-5	0	0
gosong63_이응수	3	2007-09-29	06:24:00	116	72	1	384	1824	-2.39913	3.24884	499	5	8	0	0
gosong63_이응수	4	2007-09-29	08:08:00	112	68	1	488	1928	-6.47162	-0.930129	104	-4	-4	0	0
gosong63_이응수	5	2007-09-29	22:56:00	111	64	1	1376	2816	-8.09052	-6.45823	888	-1	-4	0	0
gosong63_이응수	6	2007-09-29	23:53:00	112	75	1	1433	2873	-7.13025	4.44368	57	1	11	0	0
gosong63_이응수	7	2007-09-30	06:41:00	134	77	2	401	3281	14.5854	5.74158	408	22	2	0	0
gosong63_이응수	8	2007-09-30	09:46:00	128	79	2	586	3466	8.45645	7.42323	185	-6	2	0	0
gosong63_이응수	9	2007-09-30	22:57:00	111	68	2	1377	4257	-9.09486	-4.93795	791	-17	-11	0	0
gosong63_이응수	10	2007-09-30	23:34:00	116	68	2	1414	4294	-4.12064	-5.00162	37	5	0	0	0
gosong63_이응수	11	2007-10-01	06:53:00	122	74	3	413	4733	1.57339	0.24293	439	6	6	0	0
gosong63_이응수	12	2007-10-01	08:52:00	124	76	3	532	4852	3.49045	2.03815	119	2	2	0	0
gosong63_이응수	13	2007-10-01	19:26:00	133	76	3	1166	5486	12.0486	0.947141	634	9	0	0	0
gosong63_이응수	14	2007-10-01	22:59:00	137	80	3	1379	5699	15.9001	4.5806	213	4	4	1	0
gosong63_이응수	15	2007-10-02	07:15:00	137	85	4	435	6195	15.5544	8.72707	496	0	5	1	1
gosong63_이응수	16	2007-10-02	08:49:00	122	74	4	529	6289	0.488903	-2.43469	94	-15	-11	0	0
gosong63_이응수	17	2007-10-02	19:56:00	122	76	4	1196	6956	0.0240251	-1.58249	667	0	2	0	0
gosong63_이응수	18	2007-10-02	23:37:00	102	65	4	1417	7177	-20.13	-12.9628	221	-20	-11	0	0
gosong63_이응수	19	2007-10-03	09:13:00	113	68	5	553	7753	-9.53146	-10.954	576	11	3	0	0
gosong63_이응수	20	2007-10-03	09:53:00	115	70	5	593	7793	-7.55934	-9.02282	40	2	2	0	0
gosong63_이응수	21	2007-10-04	14:29:00	128	101	6	869	9509	4.24466	19.0242	1716	13	31	0	1
Result	nx	reading.date	reading.time	sbp	dbp	day	minutes	time	res.sbp	res.dbp	dtime	dsbp	ddbp	sbp.bi	dbp.bi
gosong64_김문식	1	2007-10-19	17:23:00	115	83	0	1043	1043	-0.810354	4.37108	NA	NA	NA	0	0
gosong64_김문식	2	2007-10-19	22:21:00	122	77	0	1341	1341	6.51769	-1.4356	298	7	-6	0	0
gosong64_김문식	3	2007-10-19	22:23:00	116	79	0	1343	1343	0.519896	0.565694	2	-6	2	0	0
gosong64_김문식	4	2007-10-20	06:30:00	108	75	1	390	1830	-6.944	-3.11838	487	-8	-4	0	0
gosong64_김문식	5	2007-10-20	06:31:00	109	76	1	391	1831	-5.9429	-2.11773	1	1	1	0	0
gosong64_김문식	6	2007-10-20	23:08:00	120	76	1	1388	2828	6.15463	-1.47096	997	11	0	0	0
gosong64_김문식	7	2007-10-20	23:09:00	112	82	1	1389	2829	-1.84426	4.52968	1	-8	6	0	0
gosong64_김문식	8	2007-10-21	08:31:00	122	77	2	511	3391	8.7744	-0.105738	562	10	-5	0	0
gosong64_김문식	9	2007-10-21	08:32:00	117	79	2	512	3392	3.77551	1.89491	1	-5	2	0	0
gosong64_김문식	10	2007-10-21	21:08:00	108	69	2	1268	4148	-4.39226	-7.61466	756	-9	-10	0	0
gosong64_김문식	11	2007-10-21	21:10:00	114	77	2	1270	4150	1.60994	0.386637	2	6	8	0	0
gosong64_김문식	12	2007-10-22	06:25:00	110	81	3	385	4705	-1.7791	4.74667	555	-4	4	0	0
gosong64_김문식	13	2007-10-22	06:27:00	113	79	3	387	4707	1.2231	2.74797	2	3	-2	0	0
gosong64_김문식	14	2007-10-22	19:51:00	104	68	3	1191	5511	-6.89183	-7.73046	804	-9	-11	0	0
gosong64_김문식	15	2007-10-22	19:53:00	106	73	3	1193	5513	-4.88963	-2.72916	2	2	5	0	0
gosong64_김문식	16	2007-10-23	06:05:00	110	78	4	365	6125	-0.215916	2.66785	612	4	5	0	0
gosong64_김문식	17	2007-10-23	06:07:00	105	75	4	367	6127	-5.21371	-0.330854	2	-5	-3	0	0
gosong64_김문식	18	2007-10-23	21:06:00	113	77	4	1266	7026	3.77594	2.25234	899	8	2	0	0
gosong64_김문식	19	2007-10-23	21:07:00	116	84	4	1267	7027	6.77704	9.25299	1	3	7	0	0
gosong64_김문식	20	2007-10-24	06:30:00	108	70	5	390	7590	-0.603194	-4.38178	563	-8	-14	0	0
gosong64_김문식	21	2007-10-24	06:32:00	109	72	5	392	7592	0.399008	-2.38049	2	1	2	0	0
Result	nx	reading.date	reading.time	sbp	dbp	day	minutes	time	res.sbp	res.dbp	dtime	dsbp	ddbp	sbp.bi	dbp.bi
gosong65_김지연	1	2007-11-19	14:07:00	132	92	0	847	847	-2.89849	-1.14838	NA	NA	NA	0	1
gosong65_김지연	2	2007-11-19	14:08:00	132	96	0	848	848	-2.89699	2.85247	1	0	4	0	1
gosong65_김지연	3	2007-11-19	20:43:00	157	102	0	1243	1243	22.6958	9.18577	395	25	6	1	1
gosong65_김지연	4	2007-11-19	20:57:00	136	94	0	1257	1257	1.71677	1.19758	14	-21	-8	1	1
gosong65_김지연	5	2007-11-19	21:02:00	124	84	0	1262	1262	-10.2757	-8.7982	5	-12	-10	0	0
gosong65_김지연	6	2007-11-19	21:03:00	124	86	0	1263	1263	-10.2742	-6.79735	1	0	2	0	1
gosong65_김지연	7	2007-11-20	05:31:00	124	92	1	331	1771	-9.51191	-0.3687	508	0	6	0	1
gosong65_김지연	8	2007-11-20	05:33:00	124	92	1	333	1773	-9.50891	-0.367012	2	0	0	0	1
gosong65_김지연	9	2007-11-20	05:34:00	127	91	1	334	1774	-6.50741	-1.36617	1	3	-1	0	1
gosong65_김지연	10	2007-11-20	10:31:00	177	111	1	631	2071	43.9383	18.8844	297	50	20	1	1
gosong65_김지연	11	2007-11-20	16:18:00	115	82	1	978	2418	-17.541	-9.82276	347	-62	-29	0	0
gosong65_김지연	12	2007-11-20	18:25:00	150	109	1	1105	2545	17.6496	17.2844	127	35	27	1	1
gosong65_김지연	13	2007-11-20	18:26:00	144	108	1	1106	2546	11.6511	16.2852	1	-6	-1	1	1
gosong65_김지연	14	2007-11-20	18:42:00	149	104	1	1122	2562	16.6751	12.2988	16	5	-4	1	1
gosong65_김지연	15	2007-11-20	21:54:00	168	104	1	1314	2754	35.9632	12.4608	192	19	0	1	1
gosong65_김지연	16	2007-11-21	06:20:00	116	84	2	380	3260	-15.2775	-7.11227	506	-52	-20	0	0
gosong65_김지연	17	2007-11-21	06:23:00	120	82	2	383	3263	-11.273	-9.10974	3	4	-2	0	0
gosong65_김지연	18	2007-11-21	06:25:00	109	70	2	385	3265	-22.27	-21.1081	2	-11	-12	0	0
gosong65_김지연	19	2007-11-22	06:02:00	129	96	3	362	4682	-0.143599	6.08762	1417	20	26	0	1
gosong65_김지연	20	2007-11-22	06:03:00	122	90	3	363	4683	-7.1421	0.0884617	1	-7	-6	0	1
gosong65_김지연	21	2007-11-22	06:05:00	124	90	3	365	4685	-5.1391	0.0901493	2	2	0	0	1
gosong65_김지연	22	2007-11-22	20:41:00	146	98	3	1241	5561	18.1754	8.82932	876	22	8	1	1
gosong65_김지연	23	2007-11-22	20:48:00	105	68	3	1248	5568	-22.814	-21.1648	7	-41	-30	0	0
gosong65_김지연	24	2007-11-22	20:49:00	103	64	3	1249	5569	-24.8125	-25.1639	1	-2	-4	0	0
gosong65_김지연	25	2007-11-22	20:50:00	104	57	3	1250	5570	-23.811	-32.1631	1	1	-7	0	0
gosong65_김지연	26	2007-11-24	06:49:00	124	92	5	409	7609	-0.751276	4.55744	2039	20	35	0	1
gosong65_김지연	27	2007-11-24	06:51:00	124	89	5	411	7611	-0.748275	1.55912	2	0	-3	0	1
gosong65_김지연	28	2007-11-24	06:53:00	126	91	5	413	7613	1.25473	3.56081	2	2	2	0	1
gosong65_김지연	29	2007-11-24	06:54:00	122	89	5	414	7614	-2.74377	1.56166	1	-4	-2	0	1
gosong65_김지연	30	2007-11-24	06:54:00	120	88	5	414	7614	-4.74377	0.561656	0	-2	-1	0	1
gosong65_김지연	31	2007-11-24	06:55:00	121	84	5	415	7615	-3.74227	-3.4375	1	1	-4	0	0
gosong65_김지연	32	2007-11-24	21:18:00	152	104	5	1278	8478	28.5528	17.2907	863	31	20	1	1
gosong65_김지연	33	2007-11-24	21:19:00	140	100	5	1279	8479	16.5543	13.2915	1	-12	-4	1	1
Result	nx	reading.date	reading.time	sbp	dbp	day	minutes	time	res.sbp	res.dbp	dtime	dsbp	ddbp	sbp.bi	dbp.bi
gosong66_맹춘열	1	2007-09-28	14:40:00	125	88	0	880	880	-5.17909	-0.14082	NA	NA	NA	0	1
gosong66_맹춘열	2	2007-09-28	22:00:00	125	87	0	1320	1320	-4.93697	-1.05631	440	0	-1	0	1
gosong66_맹춘열	3	2007-09-29	06:22:00	139	88	1	382	1822	9.33927	0.0401181	502	14	1	1	1
gosong66_맹춘열	4	2007-09-29	08:05:00	128	86	1	485	1925	-1.60406	-1.9401	103	-11	-2	0	1
gosong66_맹춘열	5	2007-09-29	22:59:00	115	80	1	1379	2819	-14.1121	-7.76838	894	-13	-6	0	0
gosong66_맹춘열	6	2007-09-29	23:52:00	116	83	1	1432	2872	-13.0829	-4.7582	53	1	3	0	0
gosong66_맹춘열	7	2007-09-30	06:35:00	140	92	2	395	3275	11.1388	4.31921	403	24	9	1	1
gosong66_맹춘열	8	2007-09-30	08:20:00	125	84	2	500	3380	-3.80341	-3.66062	105	-15	-8	0	0
gosong66_맹춘열	9	2007-09-30	18:17:00	134	88	2	1097	3977	5.52511	0.454047	597	9	4	0	1
gosong66_맹춘열	10	2007-09-30	22:57:00	148	96	2	1377	4257	19.6792	8.50783	280	14	8	1	1
gosong66_맹춘열	11	2007-10-01	06:27:00	132	93	3	387	4707	3.92681	5.59426	450	-16	-3	0	1
gosong66_맹춘열	12	2007-10-01	08:49:00	124	86	3	529	4849	-3.99505	-1.37846	142	-8	-7	0	1
gosong66_맹춘열	13	2007-10-01	19:29:00	139	97	3	1169	5489	11.3571	9.74447	640	15	11	1	1
gosong66_맹춘열	14	2007-10-01	23:02:00	138	95	3	1382	5702	10.4743	7.78538	213	-1	-2	1	1
gosong66_맹춘열	15	2007-10-02	08:24:00	125	88	4	504	6264	-2.21641	0.893331	562	-13	-7	0	1
gosong66_맹춘열	16	2007-10-02	08:49:00	120	84	4	529	6289	-7.20265	-3.10187	25	-5	-4	0	0
gosong66_맹춘열	17	2007-10-02	22:36:00	129	84	4	1356	7116	2.25242	-2.94302	827	9	0	0	0
gosong66_맹춘열	18	2007-10-02	23:38:00	123	87	4	1418	7178	-3.71346	0.0688904	62	-6	3	0	1
gosong66_맹춘열	19	2007-10-03	06:56:00	117	82	5	416	7616	-9.47244	-4.84698	438	-6	-5	0	0
gosong66_맹춘열	20	2007-10-03	09:54:00	122	81	5	594	7794	-4.37449	-5.81279	178	5	-1	0	0
Result	nx	reading.date	reading.time	sbp	dbp	day	minutes	time	res.sbp	res.dbp	dtime	dsbp	ddbp	sbp.bi	dbp.bi
gosong67_이경순	1	2007-10-19	22:20:00	112	74	0	1340	1340	-7.56192	-7.67361	NA	NA	NA	0	0
gosong67_이경순	2	2007-10-19	22:22:00	108	74	0	1342	1342	-11.5622	-7.6732	2	-4	0	0	0
gosong67_이경순	3	2007-10-20	06:30:00	121	83	1	390	1830	1.35726	1.42848	488	13	9	0	0
gosong67_이경순	4	2007-10-20	06:32:00	121	85	1	392	1832	1.35693	3.42889	2	0	2	0	1
gosong67_이경순	5	2007-10-20	23:08:00	112	83	1	1388	2828	-7.80737	1.63641	996	-9	-2	0	0
gosong67_이경순	6	2007-10-20	23:10:00	116	80	1	1390	2830	-3.8077	-1.36318	2	4	-3	0	0
gosong67_이경순	7	2007-10-21	08:29:00	129	88	2	509	3389	9.10009	6.75329	559	13	8	0	1
gosong67_이경순	8	2007-10-21	08:31:00	124	81	2	511	3391	4.09976	-0.246295	2	-5	-7	0	0
gosong67_이경순	9	2007-10-21	21:08:00	133	75	2	1268	4148	12.9749	-6.08858	757	9	-6	0	0
gosong67_이경순	10	2007-10-21	21:10:00	112	88	2	1270	4150	-8.02544	6.91184	2	-21	13	0	1
gosong67_이경순	11	2007-10-22	06:26:00	140	86	3	386	4706	19.8828	5.02768	556	28	-2	1	1
gosong67_이경순	12	2007-10-22	06:27:00	132	86	3	387	4707	11.8827	5.02789	1	-8	0	0	1
gosong67_이경순	13	2007-10-22	19:51:00	120	84	3	1191	5511	-0.249942	3.1954	804	-12	-2	0	0
gosong67_이경순	14	2007-10-22	19:53:00	121	79	3	1193	5513	0.749728	-1.80418	2	1	-5	0	0
gosong67_이경순	15	2007-10-23	06:08:00	124	88	4	368	6128	3.64828	7.32395	615	3	9	0	1
gosong67_이경순	16	2007-10-23	06:09:00	124	84	4	369	6129	3.64812	3.32416	1	0	-4	0	0
gosong67_이경순	17	2007-10-23	21:04:00	113	74	4	1264	7024	-7.49952	-6.48937	895	-11	-10	0	0
gosong67_이경순	18	2007-10-23	21:06:00	110	72	4	1266	7026	-10.4998	-8.48896	2	-3	-2	0	0
gosong67_이경순	19	2007-10-23	21:08:00	109	76	4	1268	7028	-11.5002	-4.48854	2	-1	4	0	0
gosong67_이경순	20	2007-10-24	06:31:00	124	80	5	391	7591	3.40695	-0.371241	563	15	4	0	0
gosong67_이경순	21	2007-10-24	06:33:00	117	81	5	393	7593	-3.59338	0.629175	2	-7	1	0	0
Result	nx	reading.date	reading.time	sbp	dbp	day	minutes	time	res.sbp	res.dbp	dtime	dsbp	ddbp	sbp.bi	dbp.bi
gosong68_김재영	1	2007-10-17	17:37:00	102	68	0	1057	1057	-2.14419	-1.98011	NA	NA	NA	0	0
gosong68_김재영	2	2007-10-17	23:55:00	101	68	0	1435	1435	-3.22572	-2.22197	378	-1	0	0	0
gosong68_김재영	3	2007-10-17	23:57:00	91	64	0	1437	1437	-13.2261	-6.22325	2	-10	-4	0	0
gosong68_김재영	4	2007-10-18	06:29:00	100	71	1	389	1829	-4.31069	0.525934	392	9	7	0	0
gosong68_김재영	5	2007-10-18	06:31:00	99	69	1	391	1831	-5.31112	-1.47535	2	-1	-2	0	0
gosong68_김재영	6	2007-10-18	22:22:00	104	75	1	1342	2782	-0.516227	3.91617	951	5	6	0	0
gosong68_김재영	7	2007-10-18	22:23:00	111	76	1	1343	2783	6.48356	4.91553	1	7	1	0	0
gosong68_김재영	8	2007-10-19	06:49:00	115	73	2	409	3289	10.3744	1.59177	506	4	-3	0	0
gosong68_김재영	9	2007-10-19	06:50:00	117	74	2	410	3290	12.3742	2.59113	1	2	1	0	0
gosong68_김재영	10	2007-10-20	00:36:00	117	69	3	36	4356	12.1443	-3.09094	1066	0	-5	0	0
gosong68_김재영	11	2007-10-20	00:37:00	104	74	3	37	4357	-0.85591	1.90842	1	-13	5	0	0
gosong68_김재영	12	2007-10-20	06:53:00	104	69	3	413	4733	-0.937003	-3.33216	376	0	-5	0	0
gosong68_김재영	13	2007-10-20	06:55:00	103	73	3	415	4735	-1.93743	0.666559	2	-1	4	0	0
gosong68_김재영	14	2007-10-21	00:27:00	112	78	4	27	5787	6.83568	4.99345	1052	9	5	0	0
gosong68_김재영	15	2007-10-21	00:29:00	116	80	4	29	5789	10.8352	6.99217	2	4	2	0	0
gosong68_김재영	16	2007-10-21	06:45:00	94	73	4	405	6165	-11.2458	-0.248413	376	-22	-7	0	0
gosong68_김재영	17	2007-10-21	06:47:00	108	75	4	407	6167	2.75372	1.75031	2	14	2	0	0
gosong68_김재영	18	2007-10-22	01:20:00	96	68	5	80	7280	-9.48632	-5.96183	1113	-12	-7	0	0
gosong68_김재영	19	2007-10-22	01:21:00	102	72	5	81	7281	-3.48654	-1.96247	1	6	4	0	0
gosong68_김재영	20	2007-10-22	06:56:00	102	72	5	416	7616	-3.55879	-2.17682	335	0	0	0	0
gosong68_김재영	21	2007-10-22	06:58:00	104	73	5	418	7618	-1.55922	-1.1781	2	2	1	0	0
Result	nx	reading.date	reading.time	sbp	dbp	day	minutes	time	res.sbp	res.dbp	dtime	dsbp	ddbp	sbp.bi	dbp.bi
gosong69_김현분	1	2007-09-13	06:13:00	149	100	0	373	373	3.69716	0.731488	NA	NA	NA	1	1
gosong69_김현분	2	2007-09-13	06:15:00	149	96	0	375	375	3.69871	-3.26677	2	0	-4	1	1
gosong69_김현분	3	2007-09-13	20:14:00	147	94	0	1214	1214	2.35023	-4.53684	839	-2	-2	1	1
gosong69_김현분	4	2007-09-13	21:56:00	137	100	0	1316	1316	-7.57057	1.5519	102	-10	6	1	1
gosong69_김현분	5	2007-09-14	05:51:00	162	112	1	351	1791	17.7983	13.9652	475	25	12	1	1
gosong69_김현분	6	2007-09-14	06:16:00	138	100	1	376	1816	-6.1823	1.98691	25	-24	-12	1	1
gosong69_김현분	7	2007-09-14	20:48:00	129	87	1	1248	2688	-14.5052	-10.2545	872	-9	-13	0	1
gosong69_김현분	8	2007-09-14	22:01:00	116	80	1	1321	2761	-27.4485	-17.1909	73	-13	-7	0	0
gosong69_김현분	9	2007-09-15	05:54:00	150	106	2	354	3234	6.91883	9.22057	473	34	26	1	1
gosong69_김현분	10	2007-09-15	06:30:00	148	99	2	390	3270	4.94679	2.25189	36	-2	-7	1	1
gosong69_김현분	11	2007-09-15	19:09:00	147	97	2	1149	4029	4.53618	0.912226	759	-1	-2	1	1
gosong69_김현분	12	2007-09-16	05:54:00	158	104	3	354	4674	16.0371	8.47338	645	11	7	1	1
gosong69_김현분	13	2007-09-18	07:07:00	144	93	5	427	7627	4.33017	0.0425045	2953	-14	-11	1	1
gosong69_김현분	14	2007-09-18	08:28:00	131	89	5	508	7708	-8.60693	-3.88703	81	-13	-4	0	1
Result	nx	reading.date	reading.time	sbp	dbp	day	minutes	time	res.sbp	res.dbp	dtime	dsbp	ddbp	sbp.bi	dbp.bi
gosong70_배명순	1	2007-11-19	14:07:00	109	69	0	847	847	6.93218	-0.73377	NA	NA	NA	0	0
gosong70_배명순	2	2007-11-20	06:48:00	111	73	1	408	1848	8.95131	3.28183	1001	2	4	0	0
gosong70_배명순	3	2007-11-20	06:52:00	108	70	1	412	1852	5.95139	0.281891	4	-3	-3	0	0
gosong70_배명순	4	2007-11-20	13:33:00	104	81	1	813	2253	1.95905	11.2881	401	-4	11	0	0
gosong70_배명순	5	2007-11-20	21:16:00	100	69	1	1276	2716	-2.03209	-0.704645	463	-4	-12	0	0
gosong70_배명순	6	2007-11-20	21:18:00	104	70	1	1278	2718	1.96794	0.295387	2	4	1	0	0
gosong70_배명순	7	2007-11-21	07:11:00	90	62	2	431	3311	-12.0207	-7.69537	593	-14	-8	0	0
gosong70_배명순	8	2007-11-21	07:13:00	95	65	2	433	3313	-7.02068	-4.69534	2	5	3	0	0
gosong70_배명순	9	2007-11-22	07:12:00	110	70	3	432	4752	8.00683	0.327083	1439	15	5	0	0
gosong70_배명순	10	2007-11-22	07:14:00	94	68	3	434	4754	-7.99314	-1.67289	2	-16	-2	0	0
gosong70_배명순	11	2007-11-22	19:24:00	100	69	3	1164	5484	-1.97918	-0.66151	730	6	1	0	0
gosong70_배명순	12	2007-11-22	19:25:00	99	71	3	1165	5485	-2.97916	1.33851	1	-1	2	0	0
gosong70_배명순	13	2007-12-22	20:28:00	98	68	33	1228	48748	-3.15214	-0.987311	43263	-1	-3	0	0
gosong70_배명순	14	2007-12-23	11:22:00	105	73	34	682	49642	3.86495	4.02662	894	7	5	0	0
gosong70_배명순	15	2007-12-23	11:24:00	99	68	34	684	49644	-2.13501	-0.973348	2	-6	-5	0	0
gosong70_배명순	16	2007-12-23	21:10:00	96	60	34	1270	50230	-5.12381	-8.96422	586	-3	-8	0	0
gosong70_배명순	17	2007-12-23	21:12:00	100	65	34	1272	50232	-1.12377	-3.96419	2	4	5	0	0
gosong70_배명순	18	2007-12-27	00:51:00	102	73	38	51	54771	0.963001	4.10655	4539	2	8	0	0
gosong70_배명순	19	2007-12-27	00:53:00	108	75	38	53	54773	6.96304	6.10658	2	6	2	0	0
Result	nx	reading.date	reading.time	sbp	dbp	day	minutes	time	res.sbp	res.dbp	dtime	dsbp	ddbp	sbp.bi	dbp.bi
gosong71_박수란	1	2007-12-04	09:36:00	116	72	0	576	576	6.02038	0.26651	NA	NA	NA	0	0
gosong71_박수란	2	2007-12-05	00:13:00	115	77	1	13	1453	4.5739	4.38745	877	-1	5	0	0
gosong71_박수란	3	2007-12-05	00:15:00	110	68	1	15	1455	-0.427122	-4.61456	2	-5	-9	0	0
gosong71_박수란	4	2007-12-05	07:10:00	108	79	1	430	1870	-2.6384	5.96947	415	-2	11	0	0
gosong71_박수란	5	2007-12-05	07:12:00	114	84	1	432	1872	3.36058	10.9675	2	6	5	0	0
gosong71_박수란	6	2007-12-06	00:17:00	112	66	2	17	2897	0.838749	-8.05995	1025	-2	-18	0	0
gosong71_박수란	7	2007-12-06	00:18:00	102	73	2	18	2898	-9.16176	-1.06095	1	-10	7	0	0
gosong71_박수란	8	2007-12-06	07:25:00	111	68	2	445	3325	-0.379148	-6.48895	427	9	-5	0	0
gosong71_박수란	9	2007-12-06	07:27:00	104	72	2	447	3327	-7.38017	-2.49096	2	-7	4	0	0
gosong71_박수란	10	2007-12-06	23:56:00	108	71	2	1436	4316	-3.88367	-4.48228	989	4	-1	0	0
gosong71_박수란	11	2007-12-06	23:57:00	106	68	2	1437	4317	-5.88418	-7.48329	1	-2	-3	0	0
gosong71_박수란	12	2007-12-07	07:19:00	123	82	3	439	4759	10.8908	6.07367	442	17	14	0	0
gosong71_박수란	13	2007-12-07	07:21:00	120	79	3	441	4761	7.88978	3.07167	2	-3	-3	0	0
gosong71_박수란	14	2007-12-07	23:40:00	109	76	3	1420	5740	-3.60864	-0.909632	979	-11	-3	0	0
gosong71_박수란	15	2007-12-07	23:41:00	112	78	3	1421	5741	-0.609144	1.08937	1	3	2	0	0
gosong71_박수란	16	2007-12-08	07:43:00	107	72	4	463	6223	-5.85453	-5.39377	482	-5	-6	0	0
gosong71_박수란	17	2007-12-08	07:45:00	109	81	4	465	6225	-3.85555	3.60423	2	2	9	0	0
gosong71_박수란	18	2007-12-08	23:57:00	116	79	4	1437	7197	2.6496	0.629943	972	7	-2	0	0
gosong71_박수란	19	2007-12-08	23:59:00	113	77	4	1439	7199	-0.351419	-1.37206	2	-3	-2	0	0
gosong71_박수란	20	2007-12-09	07:57:00	116	83	5	477	7677	2.40523	4.14881	478	3	6	0	0
gosong71_박수란	21	2007-12-09	07:58:00	119	81	5	478	7678	5.40472	2.14781	1	3	-2	0	0
Result	nx	reading.date	reading.time	sbp	dbp	day	minutes	time	res.sbp	res.dbp	dtime	dsbp	ddbp	sbp.bi	dbp.bi
gosong72_유상복	1	2007-09-14	06:07:00	140	96	0	367	367	0.185182	0.0314195	NA	NA	NA	1	1
gosong72_유상복	2	2007-09-18	07:08:00	85	57	4	428	6188	-9.2841	1.15144	5821	-55	-39	0	0
gosong72_유상복	3	2007-09-18	07:14:00	100	54	4	434	6194	5.76283	-1.80721	6	15	-3	0	0
gosong72_유상복	4	2007-09-18	12:21:00	96	56	4	741	6501	4.16413	2.30873	307	-4	2	0	0
gosong72_유상복	5	2007-09-18	12:22:00	91	52	4	742	6502	-0.828049	-1.68438	1	-5	-4	0	0
Result	nx	reading.date	reading.time	sbp	dbp	day	minutes	time	res.sbp	res.dbp	dtime	dsbp	ddbp	sbp.bi	dbp.bi
gosong73_안철호	1	2007-09-12	15:33:00	108	77	0	933	933	-1.94094	-0.321073	NA	NA	NA	0	0
gosong73_안철호	2	2007-09-12	22:26:00	117	76	0	1346	1346	6.51124	-1.53201	413	9	-1	0	0
gosong73_안철호	3	2007-09-13	08:24:00	112	77	1	504	1944	0.718036	-0.837436	598	-5	1	0	0
gosong73_안철호	4	2007-09-13	09:03:00	121	89	1	543	1983	9.66631	11.1426	39	9	12	0	1
gosong73_안철호	5	2007-09-13	18:22:00	118	83	1	1102	2542	5.92483	4.85714	559	-3	-6	0	0
gosong73_안철호	6	2007-09-13	22:34:00	102	68	1	1354	2794	-10.4094	-10.2716	252	-16	-15	0	0
gosong73_안철호	7	2007-09-14	07:50:00	99	60	2	470	3350	-14.1469	-18.5555	556	-3	-8	0	0
gosong73_안철호	8	2007-09-14	10:37:00	112	77	2	637	3517	-1.36844	-1.64084	167	13	17	0	0
gosong73_안철호	9	2007-09-14	21:33:00	113	76	2	1293	4173	-1.23858	-2.97589	656	1	-1	0	0
gosong73_안철호	10	2007-09-15	00:03:00	110	80	3	3	4323	-4.43755	0.947502	150	-3	4	0	0
gosong73_안철호	11	2007-09-15	09:06:00	119	85	3	546	4866	3.8422	5.67017	543	9	5	0	1
gosong73_안철호	12	2007-09-15	14:39:00	110	83	3	879	5199	-5.5995	3.50009	333	-9	-2	0	0
gosong73_안철호	13	2007-09-15	19:48:00	128	87	3	1188	5508	11.9906	7.34227	309	18	4	0	1
gosong73_안철호	14	2007-09-15	23:02:00	117	80	3	1382	5702	0.733305	0.243185	194	-11	-7	0	0
gosong73_안철호	15	2007-09-16	07:34:00	108	80	4	454	6214	-8.94583	-0.0183166	512	-9	0	0	0
gosong73_안철호	16	2007-09-16	20:06:00	116	85	4	1206	6966	-1.94331	4.5976	752	8	5	0	1
gosong73_안철호	17	2007-09-16	22:47:00	123	89	4	1367	7127	4.84314	8.51537	161	7	4	0	1
gosong73_안철호	18	2007-09-16	23:38:00	127	86	4	1418	7178	8.77549	5.48933	51	4	-3	0	1
gosong73_안철호	19	2007-09-17	08:44:00	120	80	5	524	7724	1.05126	-0.789541	546	-7	-6	0	0
gosong73_안철호	20	2007-09-17	12:21:00	116	76	5	741	7941	-3.23658	-4.90037	217	-4	-4	0	0
gosong73_안철호	21	2007-09-18	15:27:00	118	77	6	927	9567	-3.39336	-4.73084	1626	2	1	0	0
gosong73_안철호	22	2007-09-18	15:29:00	124	76	6	929	9569	2.60399	-5.73187	2	6	-1	0	0
Result	nx	reading.date	reading.time	sbp	dbp	day	minutes	time	res.sbp	res.dbp	dtime	dsbp	ddbp	sbp.bi	dbp.bi
gosong74_김순이	1	2007-10-05	09:37:00	107	78	0	577	577	3.70889	3.44095	NA	NA	NA	0	0
gosong74_김순이	2	2007-10-05	18:38:00	102	76	0	1118	1118	-1.59615	1.24529	541	-5	-2	0	0
gosong74_김순이	3	2007-10-05	23:31:00	104	75	0	1411	1411	0.238634	0.139319	293	2	-1	0	0
gosong74_김순이	4	2007-10-06	06:22:00	108	74	1	382	1822	4.00689	-1.00933	411	4	-1	0	0
gosong74_김순이	5	2007-10-06	09:23:00	96	68	1	563	2003	-8.09517	-7.07479	181	-12	-6	0	0
gosong74_김순이	6	2007-10-06	21:30:00	116	80	1	1290	2730	11.4949	4.66228	727	20	12	0	0
gosong74_김순이	7	2007-10-07	07:27:00	107	78	2	447	3327	2.15828	2.44636	597	-9	-2	0	0
gosong74_김순이	8	2007-10-07	09:38:00	104	75	2	578	3458	-0.915591	-0.60102	131	-3	-3	0	0
gosong74_김순이	9	2007-10-07	18:07:00	100	80	2	1087	3967	-5.2026	4.21489	509	-4	5	0	0
gosong74_김순이	10	2007-10-07	20:42:00	110	76	2	1242	4122	4.71001	0.158831	155	10	-4	0	0
gosong74_김순이	11	2007-10-08	06:53:00	91	68	3	413	4733	-14.6345	-8.06215	611	-19	-8	0	0
gosong74_김순이	12	2007-10-08	08:40:00	105	73	3	520	4840	-0.694847	-3.10085	107	14	5	0	0
gosong74_김순이	13	2007-10-08	21:30:00	100	72	3	1290	5610	-6.12902	-4.37934	770	-5	-1	0	0
gosong74_김순이	14	2007-10-09	07:00:00	96	72	4	420	6180	-10.4504	-4.58549	570	-4	0	0	0
gosong74_김순이	15	2007-10-09	08:53:00	114	83	4	533	6293	7.48586	6.37364	113	18	11	0	0
gosong74_김순이	16	2007-10-09	19:26:00	112	80	4	1166	6926	5.12894	3.14471	633	-2	-3	0	0
gosong74_김순이	17	2007-10-09	21:40:00	114	81	4	1300	7060	7.05338	4.09624	134	2	1	0	0
gosong74_김순이	18	2007-10-10	07:09:00	109	76	5	429	7629	1.73254	-1.10955	569	-5	-5	0	0
Result	nx	reading.date	reading.time	sbp	dbp	day	minutes	time	res.sbp	res.dbp	dtime	dsbp	ddbp	sbp.bi	dbp.bi
gosong75_맹덕열	1	2007-09-28	14:39:00	127	90	0	879	879	6.71099	3.5505	NA	NA	NA	0	1
gosong75_맹덕열	2	2007-09-28	14:41:00	128	97	0	881	881	7.71307	10.5511	2	1	7	0	1
gosong75_맹덕열	3	2007-09-29	07:21:00	112	83	1	441	1881	-7.24622	-3.13213	1000	-16	-14	0	0
gosong75_맹덕열	4	2007-09-29	08:53:00	118	79	1	533	1973	-1.15047	-7.10299	92	6	-4	0	0
gosong75_맹덕열	5	2007-09-29	20:25:00	117	85	1	1225	2665	-1.4303	-0.883813	692	-1	6	0	1
gosong75_맹덕열	6	2007-09-29	22:56:00	116	88	1	1376	2816	-2.27315	2.16401	151	-1	3	0	1
gosong75_맹덕열	7	2007-09-30	08:02:00	113	86	2	482	3362	-4.70492	0.33695	546	-3	-2	0	1
gosong75_맹덕열	8	2007-09-30	09:17:00	121	78	2	557	3437	3.37313	-7.63929	75	8	-8	0	0
gosong75_맹덕열	9	2007-09-30	19:52:00	111	84	2	1192	4072	-5.96602	-1.43817	635	-10	6	0	0
gosong75_맹덕열	10	2007-09-30	23:23:00	112	80	2	1403	4283	-4.74643	-5.37134	211	1	-4	0	0
gosong75_맹덕열	11	2007-10-01	07:54:00	111	80	3	474	4794	-5.21462	-5.20949	511	-1	0	0	0
gosong75_맹덕열	12	2007-10-01	09:51:00	117	82	3	591	4911	0.907139	-3.17243	117	6	2	0	0
gosong75_맹덕열	13	2007-10-01	19:17:00	122	96	3	1157	5477	6.49618	11.0068	566	5	14	0	1
gosong75_맹덕열	14	2007-10-01	22:08:00	112	85	3	1328	5648	-3.32586	0.0610029	171	-10	-11	0	1
gosong75_맹덕열	15	2007-10-02	08:38:00	117	88	4	518	6278	2.32979	3.26054	630	5	3	0	1
gosong75_맹덕열	16	2007-10-02	09:17:00	126	88	4	557	6317	11.3704	3.2729	39	9	0	0	1
gosong75_맹덕열	17	2007-10-02	21:01:00	110	84	4	1261	7021	-3.89696	-0.504122	704	-16	-4	0	0
gosong75_맹덕열	18	2007-10-02	23:25:00	116	88	4	1405	7165	2.2529	3.54149	144	6	4	0	1
gosong75_맹덕열	19	2007-10-03	08:12:00	112	81	5	492	7692	-1.19864	-3.29159	527	-4	-7	0	0
Result	nx	reading.date	reading.time	sbp	dbp	day	minutes	time	res.sbp	res.dbp	dtime	dsbp	ddbp	sbp.bi	dbp.bi
gosong76_김선복	1	2007-12-28	23:19:00	126	92	0	1399	1399	0.318028	5.78022	NA	NA	NA	0	1
gosong76_김선복	2	2007-12-28	23:21:00	122	85	0	1401	1401	-3.67765	-1.21704	2	-4	-7	0	1
gosong76_김선복	3	2007-12-29	07:58:00	136	93	1	478	1918	11.4389	7.48901	517	14	8	1	1
gosong76_김선복	4	2007-12-29	08:02:00	126	86	1	482	1922	1.44751	0.494477	4	-10	-7	0	1
gosong76_김선복	5	2007-12-29	22:46:00	115	80	1	1366	2806	-7.64338	-4.29826	884	-11	-6	0	0
gosong76_김선복	6	2007-12-29	22:48:00	120	81	1	1368	2808	-2.63907	-3.29553	2	5	1	0	0
gosong76_김선복	7	2007-12-30	08:21:00	123	84	2	501	3381	1.5984	0.487009	573	3	3	0	0
gosong76_김선복	8	2007-12-30	08:22:00	117	77	2	502	3382	-4.39944	-6.51162	1	-6	-7	0	0
gosong76_김선복	9	2007-12-31	08:09:00	128	87	3	489	4809	9.68234	5.43721	1427	11	10	0	1
gosong76_김선복	10	2007-12-31	08:11:00	120	87	3	491	4811	1.68666	5.43994	2	-8	0	0	1
gosong76_김선복	11	2007-12-31	23:39:00	111	76	3	1419	5739	-5.30922	-4.29271	928	-9	-11	0	0
gosong76_김선복	12	2007-12-31	23:40:00	107	69	3	1420	5740	-9.30706	-11.2913	1	-4	-7	0	0
gosong76_김선복	13	2008-01-01	08:24:00	120	74	4	504	6264	4.82458	-5.57572	524	13	5	0	0
gosong76_김선복	14	2008-01-01	08:25:00	116	75	4	505	6265	0.826744	-4.57436	1	-4	1	0	0
gosong76_김선복	15	2008-01-01	22:36:00	110	79	4	1356	7116	-3.33542	0.587839	851	-6	4	0	0
gosong76_김선복	16	2008-01-01	22:38:00	111	81	4	1358	7118	-2.3311	2.59057	2	1	2	0	0
gosong76_김선복	17	2008-01-02	08:12:00	112	80	5	492	7692	-0.0914762	2.37447	574	1	-1	0	0
gosong76_김선복	18	2008-01-02	08:13:00	119	88	5	493	7693	6.91068	10.3758	1	7	8	0	1
Result	nx	reading.date	reading.time	sbp	dbp	day	minutes	time	res.sbp	res.dbp	dtime	dsbp	ddbp	sbp.bi	dbp.bi
gosong77_박종렬	1	2007-09-12	20:27:00	104	55	0	1227	1227	-2.73987	-12.9307	NA	NA	NA	0	0
gosong77_박종렬	2	2007-09-12	20:28:00	94	70	0	1228	1228	-12.7417	2.06825	1	-10	15	0	0
gosong77_박종렬	3	2007-09-12	21:27:00	122	80	0	1287	1287	15.1523	12.0061	59	28	10	0	0
gosong77_박종렬	4	2007-09-12	21:29:00	103	64	0	1289	1289	-3.85133	-3.99597	2	-19	-16	0	0
gosong77_박종렬	5	2007-09-13	07:12:00	108	74	1	432	1872	0.100612	5.3902	583	5	10	0	0
gosong77_박종렬	6	2007-09-13	14:41:00	97	57	1	881	2321	-11.7066	-12.0825	449	-11	-17	0	0
gosong77_박종렬	7	2007-09-14	06:02:00	120	79	2	362	3242	9.63777	8.94778	921	23	22	0	0
gosong77_박종렬	8	2007-09-14	07:52:00	124	72	2	472	3352	13.44	1.83196	110	4	-7	0	0
gosong77_박종렬	9	2007-09-14	19:10:00	112	70	2	1150	4030	0.221181	-0.881883	678	-12	-2	0	0
gosong77_박종렬	10	2007-09-14	21:40:00	114	70	2	1300	4180	1.95153	-1.03981	150	2	0	0	0
gosong77_박종렬	11	2007-09-15	06:47:00	105	72	3	407	4727	-8.03181	0.384268	547	-9	2	0	0
gosong77_박종렬	12	2007-09-16	22:11:00	122	78	4	1331	7091	4.71843	3.89529	2364	17	6	0	0
gosong77_박종렬	13	2007-09-16	22:12:00	114	76	4	1332	7092	-3.28337	1.89424	1	-8	-2	0	0
gosong77_박종렬	14	2007-09-18	06:38:00	119	68	6	398	9038	-1.78169	-8.15464	1946	5	-8	0	0
gosong77_박종렬	15	2007-09-18	09:27:00	120	79	6	567	9207	-1.0855	2.66742	169	1	11	0	0
Result	nx	reading.date	reading.time	sbp	dbp	day	minutes	time	res.sbp	res.dbp	dtime	dsbp	ddbp	sbp.bi	dbp.bi
gosong78_황애경	1	2007-09-13	14:41:00	116	76	0	881	881	2.19469	2.78744	NA	NA	NA	0	0
gosong78_황애경	2	2007-09-13	15:43:00	118	73	0	943	943	4.12956	-0.241129	62	2	-3	0	0
gosong78_황애경	3	2007-09-13	21:55:00	114	72	0	1315	1315	-0.261191	-1.41255	372	-4	-1	0	0
gosong78_황애경	4	2007-09-13	21:56:00	107	77	0	1316	1316	-7.26224	3.58699	1	-7	5	0	0
gosong78_황애경	5	2007-09-14	06:05:00	111	72	1	365	1805	-3.7759	-1.63835	489	4	-5	0	0
gosong78_황애경	6	2007-09-14	07:54:00	118	71	1	474	1914	3.10961	-2.68857	109	7	-1	0	0
gosong78_황애경	7	2007-09-14	19:11:00	122	76	1	1151	2591	6.39848	1.99946	677	4	5	0	0
gosong78_황애경	8	2007-09-14	21:40:00	114	78	1	1300	2740	-1.75804	3.9308	149	-8	2	0	0
gosong78_황애경	9	2007-09-15	06:25:00	106	69	2	385	3265	-10.3095	-5.31113	525	-8	-9	0	0
gosong78_황애경	10	2007-09-15	08:13:00	121	73	2	493	3373	4.57705	-1.36089	108	15	4	0	0
gosong78_황애경	11	2007-09-16	08:33:00	132	80	3	513	4833	14.0434	4.96633	1460	11	7	0	0
gosong78_황애경	12	2007-09-16	22:09:00	112	72	3	1329	5649	-6.8137	-3.40969	816	-20	-8	0	0
gosong78_황애경	13	2007-09-16	22:11:00	109	69	3	1331	5651	-9.8158	-6.41062	2	-3	-3	0	0
gosong78_황애경	14	2007-09-17	21:22:00	127	77	4	1282	7042	6.72307	0.948399	1391	18	8	0	0
gosong78_황애경	15	2007-09-17	21:24:00	124	76	4	1284	7044	3.72097	-0.0525227	2	-3	-1	0	0
gosong78_황애경	16	2007-09-18	06:39:00	109	72	5	399	7599	-11.862	-4.30827	555	-15	-4	0	0
gosong78_황애경	17	2007-09-18	09:27:00	128	85	5	567	7767	6.96152	8.61431	168	19	13	0	1
Result	nx	reading.date	reading.time	sbp	dbp	day	minutes	time	res.sbp	res.dbp	dtime	dsbp	ddbp	sbp.bi	dbp.bi
gosong79_이상영	1	2007-10-05	09:54:00	116	68	0	594	594	-13.269	-4.19628	NA	NA	NA	0	0
gosong79_이상영	2	2007-10-05	19:38:00	150	76	0	1178	1178	20.0294	3.19326	584	34	8	1	0
gosong79_이상영	3	2007-10-06	06:18:00	118	74	1	378	1818	-12.7394	0.524269	640	-32	-2	0	0
gosong79_이상영	4	2007-10-06	08:08:00	138	75	1	488	1928	7.12844	1.40929	110	20	1	1	0
gosong79_이상영	5	2007-10-06	18:33:00	124	75	1	1113	2553	-7.62238	0.755974	625	-14	0	0	0
gosong79_이상영	6	2007-10-07	08:17:00	124	72	2	497	3377	-8.61226	-3.10535	824	0	-3	0	0
gosong79_이상영	7	2007-10-07	18:43:00	145	73	2	1123	4003	11.6357	-2.75971	626	21	1	1	0
gosong79_이상영	8	2007-10-08	10:25:00	149	81	3	625	4945	14.5041	4.25562	942	4	8	1	0
gosong79_이상영	9	2007-10-08	21:30:00	134	79	3	1290	5610	-1.29478	1.56049	665	-15	-2	0	0
gosong79_이상영	10	2007-10-09	07:55:00	132	80	4	475	6235	-4.0456	1.90718	625	-2	1	0	0
gosong79_이상영	11	2007-10-10	07:04:00	132	76	5	424	7624	-5.71422	-3.54474	1389	0	-4	0	0
Result	nx	reading.date	reading.time	sbp	dbp	day	minutes	time	res.sbp	res.dbp	dtime	dsbp	ddbp	sbp.bi	dbp.bi
gosong80_김영숙	1	2007-09-28	14:39:00	132	93	0	879	879	20.0818	17.5426	NA	NA	NA	0	1
gosong80_김영숙	2	2007-09-29	07:22:00	106	72	1	442	1882	-5.15222	-2.75785	1003	-26	-21	0	0
gosong80_김영숙	3	2007-09-29	08:53:00	105	77	1	533	1973	-6.08272	2.30562	91	-1	5	0	0
gosong80_김영숙	4	2007-09-29	20:26:00	112	78	1	1226	2666	1.4465	3.78896	693	7	1	0	0
gosong80_김영숙	5	2007-09-29	22:55:00	112	70	1	1375	2815	1.56029	-4.10711	149	0	-8	0	0
gosong80_김영숙	6	2007-09-30	08:03:00	104	73	2	483	3363	-6.02122	-0.724905	548	-8	3	0	0
gosong80_김영숙	7	2007-09-30	09:17:00	108	60	2	557	3437	-1.9647	-13.6733	74	4	-13	0	0
gosong80_김영숙	8	2007-09-30	19:53:00	108	75	2	1193	4073	-1.47901	1.77029	636	0	15	0	0
gosong80_김영숙	9	2007-09-30	23:23:00	109	69	2	1403	4283	-0.318638	-4.08324	210	1	-6	0	0
gosong80_김영숙	10	2007-10-01	07:54:00	104	69	3	474	4794	-4.9284	-3.72684	511	-5	0	0	0
gosong80_김영숙	11	2007-10-01	09:51:00	99	60	3	591	4911	-9.83905	-12.6452	117	-5	-9	0	0
gosong80_김영숙	12	2007-10-01	19:18:00	106	61	3	1158	5478	-2.40605	-11.2498	567	7	1	0	0
gosong80_김영숙	13	2007-10-01	22:08:00	108	77	3	1328	5648	-0.276224	4.8688	170	2	16	0	0
gosong80_김영숙	14	2007-10-02	08:38:00	104	72	4	518	6278	-3.79511	0.308198	630	-4	-5	0	0
gosong80_김영숙	15	2007-10-02	09:17:00	106	75	4	557	6317	-1.76533	3.3354	39	2	3	0	0
gosong80_김영숙	16	2007-10-02	21:02:00	114	80	4	1262	7022	6.77306	8.82711	705	8	5	0	0
gosong80_김영숙	17	2007-10-02	23:25:00	116	77	4	1405	7165	8.88227	5.92685	143	2	-3	0	0
gosong80_김영숙	18	2007-10-03	08:12:00	112	75	5	492	7692	5.28472	4.29441	527	-4	-2	0	0
Result	nx	reading.date	reading.time	sbp	dbp	day	minutes	time	res.sbp	res.dbp	dtime	dsbp	ddbp	sbp.bi	dbp.bi
gosong81_강정란	1	2007-11-19	14:06:00	146	85	0	846	846	-2.72131	4.75646	NA	NA	NA	1	1
gosong81_강정란	2	2007-11-19	20:42:00	159	82	0	1242	1242	11.1379	1.93883	396	13	-3	1	0
gosong81_강정란	3	2007-11-19	21:05:00	159	84	0	1265	1265	11.1878	3.94943	23	0	2	1	0
gosong81_강정란	4	2007-11-19	21:07:00	138	82	0	1267	1267	-9.80785	1.95035	2	-21	-2	1	0
gosong81_강정란	5	2007-11-19	21:08:00	151	82	0	1268	1268	3.19432	1.95081	1	13	0	1	0
gosong81_강정란	6	2007-11-19	21:11:00	152	81	0	1271	1271	4.20083	0.952188	3	1	-1	1	0
gosong81_강정란	7	2007-11-19	21:13:00	137	84	0	1273	1273	-10.7948	3.95311	2	-15	3	1	0
gosong81_강정란	8	2007-11-19	21:15:00	151	80	0	1275	1275	3.20951	-0.0459695	2	14	-4	1	0
gosong81_강정란	9	2007-11-19	21:17:00	135	85	0	1277	1277	-12.7862	4.95495	2	-16	5	1	1
gosong81_강정란	10	2007-11-19	21:23:00	173	79	0	1283	1283	25.2269	-1.04229	6	38	-6	1	0
gosong81_강정란	11	2007-11-19	21:25:00	171	73	0	1285	1285	23.2312	-7.04136	2	-2	-6	1	0
gosong81_강정란	12	2007-11-19	21:27:00	136	73	0	1287	1287	-11.7645	-7.04044	2	-35	0	1	0
gosong81_강정란	13	2007-11-19	21:28:00	124	69	0	1288	1288	-23.7623	-11.04	1	-12	-4	0	0
gosong81_강정란	14	2007-11-19	21:30:00	126	72	0	1290	1290	-21.7579	-8.03906	2	2	3	0	0
gosong81_강정란	15	2007-11-20	05:36:00	156	76	1	336	1776	9.29654	-3.81524	486	30	4	1	0
gosong81_강정란	16	2007-11-20	05:40:00	143	83	1	340	1780	-3.69478	3.1866	4	-13	7	1	0
gosong81_강정란	17	2007-11-20	05:45:00	142	81	1	345	1785	-4.68393	1.1889	5	-1	-2	1	0
gosong81_강정란	18	2007-11-20	05:47:00	144	90	1	347	1787	-2.67959	10.1898	2	2	9	1	1
gosong81_강정란	19	2007-11-20	05:49:00	136	81	1	349	1789	-10.6753	1.19075	2	-8	-9	1	0
gosong81_강정란	20	2007-11-20	05:54:00	156	84	1	354	1794	9.3356	4.19305	5	20	3	1	0
gosong81_강정란	21	2007-11-20	05:56:00	163	82	1	356	1796	16.3399	2.19397	2	7	-2	1	0
gosong81_강정란	22	2007-11-20	05:58:00	143	79	1	358	1798	-3.65572	-0.805109	2	-20	-3	1	0
gosong81_강정란	23	2007-11-20	06:00:00	136	80	1	360	1800	-10.6514	0.195812	2	-7	1	1	0
gosong81_강정란	24	2007-11-20	18:44:00	144	106	1	1124	2564	-0.993712	26.5477	764	8	26	1	1
gosong81_강정란	25	2007-11-20	18:46:00	168	72	1	1126	2566	23.0106	-7.45142	2	24	-34	1	0
gosong81_강정란	26	2007-11-20	18:48:00	156	77	1	1128	2568	11.015	-2.4505	2	-12	5	1	0
gosong81_강정란	27	2007-11-21	06:26:00	156	82	2	386	3266	12.5294	2.87096	698	0	5	1	0
gosong81_강정란	28	2007-11-21	06:27:00	139	90	2	387	3267	-4.46839	10.8714	1	-17	8	1	1
gosong81_강정란	29	2007-11-21	06:29:00	158	78	2	389	3269	14.5359	-1.12766	2	19	-12	1	0
gosong81_강정란	30	2007-11-21	06:30:00	152	80	2	390	3270	8.53812	0.872801	1	-6	2	1	0
gosong81_강정란	31	2007-11-21	06:32:00	144	89	2	392	3272	0.542456	9.87372	2	-8	9	1	1
gosong81_강정란	32	2007-11-21	06:34:00	157	80	2	394	3274	13.5468	0.874643	2	13	-9	1	0
gosong81_강정란	33	2007-11-21	06:36:00	161	88	2	396	3276	17.5511	8.87556	2	4	8	1	1
gosong81_강정란	34	2007-11-21	06:38:00	127	63	2	398	3278	-16.4445	-16.1235	2	-34	-25	0	0
gosong81_강정란	35	2007-11-21	06:40:00	131	66	2	400	3280	-12.4402	-13.1226	2	4	3	0	0
gosong81_강정란	36	2007-11-21	06:41:00	123	68	2	401	3281	-20.438	-11.1221	1	-8	2	0	0
gosong81_강정란	37	2007-11-22	06:08:00	159	79	3	368	4688	18.6148	0.525841	1407	36	11	1	0
gosong81_강정란	38	2007-11-22	06:10:00	130	64	3	370	4690	-10.3809	-14.4732	2	-29	-15	0	0
gosong81_강정란	39	2007-11-22	06:12:00	120	64	3	372	4692	-20.3765	-14.4723	2	-10	0	0	0
gosong81_강정란	40	2007-11-22	06:14:00	122	60	3	374	4694	-18.3722	-18.4714	2	2	-4	0	0
gosong81_강정란	41	2007-11-22	06:16:00	127	77	3	376	4696	-13.3679	-1.47047	2	5	17	0	0
gosong81_강정란	42	2007-11-22	06:17:00	136	75	3	377	4697	-4.36568	-3.47001	1	9	-2	1	0
gosong81_강정란	43	2007-11-22	06:18:00	137	79	3	378	4698	-3.36351	0.530447	1	1	4	1	0
gosong81_강정란	44	2007-11-22	20:54:00	147	88	3	1254	5574	8.53717	9.93388	876	10	9	1	1
gosong81_강정란	45	2007-11-22	20:57:00	108	78	3	1257	5577	-30.4563	-0.0647419	3	-39	-10	0	0
gosong81_강정란	46	2007-11-22	20:59:00	152	80	3	1259	5579	13.548	1.93618	2	44	2	1	0
gosong81_강정란	47	2007-11-22	21:01:00	139	79	3	1261	5581	0.55236	0.9371	2	-13	-1	1	0
gosong81_강정란	48	2007-11-23	06:24:00	153	89	4	384	6144	15.7739	11.1964	563	14	10	1	1
gosong81_강정란	49	2007-11-23	06:26:00	144	82	4	386	6146	6.77826	4.1973	2	-9	-7	1	0
gosong81_강정란	50	2007-11-23	06:29:00	133	79	4	389	6149	-4.21523	1.19868	3	-11	-3	0	0
gosong81_강정란	51	2007-11-23	06:31:00	135	80	4	391	6151	-2.21089	2.19961	2	2	1	1	0
gosong81_강정란	52	2007-11-24	06:57:00	139	80	5	417	7617	4.96993	2.87475	1466	4	0	1	0
gosong81_강정란	53	2007-11-24	06:58:00	140	80	5	418	7618	5.9721	2.87521	1	1	0	1	0
gosong81_강정란	54	2007-11-24	06:59:00	128	74	5	419	7619	-6.02573	-3.12433	1	-12	-6	0	0
gosong81_강정란	55	2007-11-24	07:01:00	139	77	5	421	7621	4.97861	-0.123405	2	11	3	1	0

## Sheet: list_2
Result	nx	reading.date	reading.time	sbp	dbp	day	minutes	time	res.sbp	res.dbp	dtime	dsbp	ddbp	sbp.bi	dbp.bi
kumwang01_강순옥	1	2007-10-18	12:36:00	131	88	0	756	756	-8.47095	-1.82887	NA	NA	NA	0	1
kumwang01_강순옥	2	2007-10-19	05:20:00	134	88	1	320	1760	-5.47928	-1.05821	1004	3	0	0	1
kumwang01_강순옥	3	2007-10-19	05:21:00	134	86	1	321	1761	-5.47929	-3.05744	1	0	-2	0	1
kumwang01_강순옥	4	2007-10-20	05:05:00	148	92	2	305	3185	8.50889	4.0356	1424	14	6	1	1
kumwang01_강순옥	5	2007-10-20	05:07:00	152	91	2	307	3187	12.5089	3.03714	2	4	-1	1	1
kumwang01_강순옥	6	2007-10-20	05:10:00	148	92	2	310	3190	8.50884	4.03944	3	-4	1	1	1
kumwang01_강순옥	7	2007-10-20	05:12:00	142	92	2	312	3192	2.50883	4.04098	2	-6	0	1	1
kumwang01_강순옥	8	2007-10-21	05:08:00	136	87	3	308	4628	-3.50309	0.143234	1436	-6	-5	1	1
kumwang01_강순옥	9	2007-10-21	05:09:00	136	79	3	309	4629	-3.5031	-7.856	1	0	-8	1	0
kumwang01_강순옥	10	2007-10-22	05:38:00	141	90	4	338	6098	1.4847	4.27159	1469	5	11	1	1
kumwang01_강순옥	11	2007-10-22	05:39:00	135	80	4	339	6099	-4.51531	-5.72764	1	-6	-10	1	0
kumwang01_강순옥	12	2007-10-22	05:40:00	144	82	4	340	6100	4.48468	-3.72688	1	9	2	1	0
kumwang01_강순옥	13	2007-10-23	04:54:00	136	86	5	294	7494	-3.52689	1.34314	1394	-8	4	1	1
kumwang01_강순옥	14	2007-10-23	04:55:00	136	87	5	295	7495	-3.5269	2.34391	1	0	1	1	1
Result	nx	reading.date	reading.time	sbp	dbp	day	minutes	time	res.sbp	res.dbp	dtime	dsbp	ddbp	sbp.bi	dbp.bi
kumwang02_공대분	1	2007-10-01	21:07:00	99	58	0	1267	1267	2.57595	0.203114	NA	NA	NA	0	0
kumwang02_공대분	2	2007-10-02	06:17:00	98	59	1	377	1817	0.0935309	0.0629784	550	-1	1	0	0
kumwang02_공대분	3	2007-10-02	12:25:00	95	56	1	745	2185	-3.89834	-3.69988	368	-3	-3	0	0
kumwang02_공대분	4	2007-10-02	20:04:00	108	71	1	1204	2644	7.86451	10.3486	459	13	15	0	0
kumwang02_공대분	5	2007-10-02	22:07:00	99	61	1	1327	2767	-1.46701	0.0936526	123	-9	-10	0	0
kumwang02_공대분	6	2007-10-03	06:23:00	100	66	2	383	3263	-1.80389	4.06546	496	1	5	0	0
kumwang02_공대분	7	2007-10-03	13:39:00	107	61	2	819	3699	4.02096	-1.83836	436	7	-5	0	0
kumwang02_공대분	8	2007-10-03	21:33:00	99	57	2	1293	4173	-5.25662	-6.82095	474	-8	-4	0	0
kumwang02_공대분	9	2007-10-04	20:13:00	106	68	3	1213	5533	-1.92224	1.35981	1360	7	11	0	0
kumwang02_공대분	10	2007-10-04	22:15:00	96	52	3	1335	5655	-12.2511	-14.8931	122	-10	-16	0	0
kumwang02_공대분	11	2007-10-05	22:37:00	98	55	4	1357	7117	-14.1916	-14.9238	1462	2	3	0	0
kumwang02_공대분	12	2007-10-06	07:47:00	97	60	5	467	7667	-16.674	-11.0639	550	-1	5	0	0
kumwang02_공대분	13	2007-10-06	09:39:00	142	94	5	579	7779	28.0241	22.7039	112	45	34	1	1
kumwang02_공대분	14	2007-10-06	09:40:00	136	92	5	580	7780	22.0214	20.7018	1	-6	-2	1	1
kumwang02_공대분	15	2007-10-06	09:41:00	140	90	5	581	7781	26.0187	18.6998	1	4	-2	1	1
kumwang02_공대분	16	2007-10-06	09:43:00	136	92	5	583	7783	22.0133	20.6956	2	-4	2	1	1
kumwang02_공대분	17	2007-10-06	09:59:00	109	61	5	599	7799	-5.02981	-10.3376	16	-27	-31	0	0
kumwang02_공대분	18	2007-10-06	11:45:00	99	64	5	705	7905	-15.3155	-7.55729	106	-10	3	0	0
kumwang02_공대분	19	2007-10-06	14:22:00	104	64	5	862	8062	-10.7387	-7.88275	157	5	0	0	0
kumwang02_공대분	20	2007-10-06	22:41:00	92	53	5	1361	8561	-24.0836	-19.9172	499	-12	-11	0	0
Result	nx	reading.date	reading.time	sbp	dbp	day	minutes	time	res.sbp	res.dbp	dtime	dsbp	ddbp	sbp.bi	dbp.bi
kumwang03_권경숙	1	2007-11-16	17:44:00	139	85	0	1064	1064	14.0744	5.06235	NA	NA	NA	1	1
kumwang03_권경숙	2	2007-11-16	21:59:00	125	83	0	1319	1319	1.22202	3.91029	255	-14	-2	0	0
kumwang03_권경숙	3	2007-11-17	06:26:00	116	76	1	386	1826	-5.49633	-1.40381	507	-9	-7	0	0
kumwang03_권경숙	4	2007-11-17	21:13:00	106	66	1	1273	2713	-11.5046	-8.45431	887	-10	-10	0	0
kumwang03_권경숙	5	2007-11-18	06:37:00	108	69	2	397	3277	-6.96638	-3.57886	564	2	3	0	0
kumwang03_권경숙	6	2007-11-18	20:24:00	111	66	2	1224	4104	-0.24462	-3.82888	827	3	-3	0	0
kumwang03_권경숙	7	2007-11-19	06:14:00	113	74	3	374	4694	4.41056	6.13302	590	2	8	0	0
kumwang03_권경숙	8	2007-11-19	21:53:00	104	64	3	1313	5633	-0.363646	-0.744567	939	-9	-10	0	0
kumwang03_권경숙	9	2007-11-20	06:09:00	107	66	4	369	6129	4.86851	2.90476	496	3	2	0	0
Result	nx	reading.date	reading.time	sbp	dbp	day	minutes	time	res.sbp	res.dbp	dtime	dsbp	ddbp	sbp.bi	dbp.bi
kumwang04_권흥운	1	2007-11-20	15:49:00	125	84	0	949	949	-4.44224	-2.18943	NA	NA	NA	0	0
kumwang04_권흥운	2	2007-11-20	15:50:00	124	83	0	950	950	-5.44193	-3.18971	1	-1	-1	0	0
kumwang04_권흥운	3	2007-11-20	21:08:00	132	92	0	1268	1268	2.65646	5.72135	318	8	9	0	1
kumwang04_권흥운	4	2007-11-20	21:10:00	134	88	0	1270	1270	4.65708	1.72079	2	2	-4	0	1
kumwang04_권흥운	5	2007-11-21	06:12:00	132	85	1	372	1812	2.82477	-1.43079	542	-2	-3	0	1
kumwang04_권흥운	6	2007-11-21	06:14:00	124	85	1	374	1814	-5.17461	-1.43135	2	-8	0	0	1
kumwang04_권흥운	7	2007-11-21	23:18:00	152	97	1	1398	2838	23.1422	10.2823	1024	28	12	1	1
kumwang04_권흥운	8	2007-11-21	23:20:00	146	94	1	1400	2840	17.1428	7.28171	2	-6	-3	1	1
kumwang04_권흥운	9	2007-11-22	06:55:00	128	87	2	415	3295	-0.716382	0.154453	455	-18	-7	0	1
kumwang04_권흥운	10	2007-11-22	06:57:00	122	88	2	417	3297	-6.71576	1.15389	2	-6	1	0	1
kumwang04_권흥운	11	2007-11-22	21:06:00	120	81	2	1266	4146	-8.45308	-6.08355	849	-2	-7	0	0
kumwang04_권흥운	12	2007-11-22	21:07:00	118	78	2	1267	4147	-10.4528	-9.08383	1	-2	-3	0	0
kumwang04_권흥운	13	2007-11-23	07:19:00	124	82	3	439	4759	-4.26342	-5.25499	612	6	4	0	0
kumwang04_권흥운	14	2007-11-23	07:20:00	115	84	3	440	4760	-13.2631	-3.25527	1	-9	2	0	0
kumwang04_권흥운	15	2007-11-23	22:07:00	128	92	3	1327	5647	0.0113336	4.49666	887	13	8	0	1
kumwang04_권흥운	16	2007-11-23	22:08:00	128	83	3	1328	5648	0.011643	-4.50362	1	0	-9	0	0
kumwang04_권흥운	17	2007-11-24	05:52:00	127	86	4	352	6112	-0.844794	-1.63339	464	-1	3	0	1
kumwang04_권흥운	18	2007-11-24	05:54:00	124	87	4	354	6114	-3.84418	-0.63395	2	-3	1	0	1
kumwang04_권흥운	19	2007-11-25	01:04:00	131	94	5	64	7264	3.51164	6.04442	1150	7	7	0	1
kumwang04_권흥운	20	2007-11-25	01:06:00	119	85	5	66	7266	-8.48774	-2.95614	2	-12	-9	0	1
kumwang04_권흥운	21	2007-11-25	07:22:00	136	89	5	442	7642	8.62859	0.938707	376	17	4	1	1
kumwang04_권흥운	22	2007-11-25	07:24:00	135	89	5	444	7644	7.62921	0.938148	2	-1	0	1	1
kumwang04_권흥운	23	2007-11-25	21:19:00	128	88	5	1279	8479	0.887562	-0.295381	835	-7	-1	0	1
kumwang04_권흥운	24	2007-11-25	21:20:00	127	88	5	1280	8480	-0.112128	-0.295661	1	-1	0	0	1
kumwang04_권흥운	25	2007-11-26	09:14:00	128	92	6	554	9194	1.10879	3.50465	714	1	4	0	1
Result	nx	reading.date	reading.time	sbp	dbp	day	minutes	time	res.sbp	res.dbp	dtime	dsbp	ddbp	sbp.bi	dbp.bi
kumwang05_김남한	1	2007-10-25	16:28:00	144	88	0	988	988	19.4584	5.3678	NA	NA	NA	1	1
kumwang05_김남한	2	2007-10-25	16:30:00	144	84	0	990	990	19.4587	1.36813	2	0	-4	1	0
kumwang05_김남한	3	2007-10-25	18:42:00	135	89	0	1122	1122	10.4804	6.39031	132	-9	5	1	1
kumwang05_김남한	4	2007-10-25	20:18:00	120	80	0	1218	1218	-4.50383	-2.59357	96	-15	-9	0	0
kumwang05_김남한	5	2007-10-25	22:44:00	110	80	0	1364	1364	-14.4798	-2.56904	146	-10	0	0	0
kumwang05_김남한	6	2007-10-26	06:23:00	123	84	1	383	1823	-1.4044	1.50806	459	13	4	0	0
kumwang05_김남한	7	2007-10-26	07:01:00	122	84	1	421	1861	-2.39815	1.51444	38	-1	0	0	0
kumwang05_김남한	8	2007-10-26	21:32:00	119	80	1	1292	2732	-5.255	-2.33924	871	-3	-4	0	0
kumwang05_김남한	9	2007-10-26	23:01:00	119	80	1	1381	2821	-5.24037	-2.32429	89	0	0	0	0
kumwang05_김남한	10	2007-10-27	06:19:00	113	80	2	379	3259	-11.1684	-2.25071	438	-6	0	0	0
kumwang05_김남한	11	2007-10-27	06:50:00	121	83	2	410	3290	-3.16328	0.754493	31	8	3	0	0
kumwang05_김남한	12	2007-10-27	20:04:00	124	82	2	1204	4084	-0.0327852	-0.112129	794	3	-1	0	0
kumwang05_김남한	13	2007-10-27	22:53:00	119	80	2	1373	4253	-5.00501	-2.08374	169	-5	-2	0	0
kumwang05_김남한	14	2007-10-28	09:06:00	111	73	3	546	4866	-12.9043	-8.98077	613	-8	-7	0	0
kumwang05_김남한	15	2007-10-28	19:32:00	130	84	3	1172	5492	6.19863	2.12439	626	19	11	0	0
kumwang05_김남한	16	2007-10-28	21:53:00	125	85	3	1313	5633	1.2218	3.14808	141	-5	1	0	1
kumwang05_김남한	17	2007-10-29	05:33:00	124	85	4	333	6093	0.297408	3.22535	460	-1	0	0	1
kumwang05_김남한	18	2007-10-29	06:53:00	120	84	4	413	6173	-3.68944	2.23879	80	-4	-1	0	0
kumwang05_김남한	19	2007-10-29	20:36:00	116	76	4	1236	6996	-7.55418	-5.62296	823	-4	-8	0	0
kumwang05_김남한	20	2007-10-29	22:43:00	123	75	4	1363	7123	-0.533304	-6.60163	127	7	-1	0	0
kumwang05_김남한	21	2007-10-30	06:02:00	124	86	5	362	7562	0.538848	4.47212	439	1	11	0	1
kumwang05_김남한	22	2007-10-30	06:54:00	125	71	5	414	7614	1.54739	-10.5191	52	1	-15	0	0
kumwang05_김남한	23	2007-10-30	19:20:00	137	84	5	1160	8360	13.67	2.60617	746	12	13	1	0
kumwang05_김남한	24	2007-10-31	06:16:00	119	84	6	376	9016	-4.22218	2.71636	656	-18	0	0	0
kumwang05_김남한	25	2007-10-31	07:03:00	120	84	6	423	9063	-3.21445	2.72426	47	1	0	0	0
kumwang05_김남한	26	2007-10-31	18:23:00	135	87	6	1103	9743	11.8973	5.83849	680	15	3	1	1
Result	nx	reading.date	reading.time	sbp	dbp	day	minutes	time	res.sbp	res.dbp	dtime	dsbp	ddbp	sbp.bi	dbp.bi
kumwang06_김덕룡	1	2007-10-01	14:21:00	124	87	0	861	861	1.57555	2.0913	NA	NA	NA	0	1
kumwang06_김덕룡	2	2007-10-01	21:04:00	122	86	0	1264	1264	0.0130533	1.30459	403	-2	-1	0	1
kumwang06_김덕룡	3	2007-10-02	06:18:00	116	82	1	378	1818	-5.38552	-2.4022	554	-6	-4	0	0
kumwang06_김덕룡	4	2007-10-02	12:21:00	123	80	1	741	2181	2.00856	-4.21008	363	7	-2	0	0
kumwang06_김덕룡	5	2007-10-02	17:57:00	118	84	1	1077	2517	-2.62667	-0.0322483	336	-5	4	0	0
kumwang06_김덕룡	6	2007-10-02	22:03:00	121	84	1	1323	2763	0.640392	0.0979488	246	3	0	0	0
kumwang06_김덕룡	7	2007-10-03	06:25:00	128	87	2	385	3265	8.18537	3.36364	502	7	3	0	1
kumwang06_김덕룡	8	2007-10-03	11:45:00	110	80	2	705	3585	-9.46723	-3.467	320	-18	-7	0	0
kumwang06_김덕룡	9	2007-10-03	15:10:00	131	88	2	910	3790	11.7553	4.6415	205	21	8	0	1
kumwang06_김덕룡	10	2007-10-03	22:56:00	120	80	2	1376	4256	1.26122	-3.11187	466	-11	-8	0	0
kumwang06_김덕룡	11	2007-10-04	07:24:00	115	85	3	444	4764	-3.18729	2.15699	508	-5	5	0	1
kumwang06_김덕룡	12	2007-10-04	13:27:00	125	88	3	807	5127	7.20679	5.34911	363	10	3	0	1
kumwang06_김덕룡	13	2007-10-04	16:01:00	109	80	3	961	5281	-8.62603	-2.56938	154	-16	-8	0	0
kumwang06_김덕룡	14	2007-10-04	22:11:00	112	77	3	1331	5651	-5.22435	-5.37356	370	3	-3	0	0
kumwang06_김덕룡	15	2007-10-05	07:38:00	114	84	4	458	6218	-2.6088	1.92653	567	2	7	0	0
kumwang06_김덕룡	16	2007-10-05	12:37:00	114	84	4	757	6517	-2.2842	2.08478	299	0	0	0	0
kumwang06_김덕룡	17	2007-10-05	15:44:00	117	80	4	944	6704	0.918807	-1.81625	187	3	-4	0	0
kumwang06_김덕룡	18	2007-10-05	22:27:00	113	80	4	1347	7107	-2.64369	-1.60296	403	-4	0	0	0
kumwang06_김덕룡	19	2007-10-06	07:38:00	118	83	5	458	7658	2.95449	1.68866	551	5	3	0	0
kumwang06_김덕룡	20	2007-10-06	11:38:00	124	80	5	698	7898	9.21503	-1.18432	240	6	-3	0	0
kumwang06_김덕룡	21	2007-10-06	14:19:00	116	84	5	859	8059	1.38982	2.90089	161	-8	4	0	0
kumwang06_김덕룡	22	2007-10-06	22:36:00	109	79	5	1356	8556	-5.07063	-1.83607	497	-7	-5	0	0
Result	nx	reading.date	reading.time	sbp	dbp	day	minutes	time	res.sbp	res.dbp	dtime	dsbp	ddbp	sbp.bi	dbp.bi
kumwang07_김동철	1	2007-10-26	08:36:00	112	72	0	516	516	-0.626307	1.80733	NA	NA	NA	0	0
kumwang07_김동철	2	2007-10-26	09:29:00	120	69	0	569	569	7.3645	-1.16198	53	8	-3	0	0
kumwang07_김동철	3	2007-10-26	18:11:00	108	70	0	1091	1091	-4.72602	0.140275	522	-12	1	0	0
kumwang07_김동철	4	2007-10-27	08:14:00	104	68	1	494	1934	-8.87221	-1.3716	843	-4	-2	0	0
kumwang07_김동철	5	2007-10-27	09:04:00	115	68	1	544	1984	2.11912	-1.34264	50	11	0	0	0
kumwang07_김동철	6	2007-10-27	12:57:00	114	67	1	777	2217	1.07871	-2.20773	233	-1	-1	0	0
kumwang07_김동철	7	2007-10-28	06:06:00	104	66	2	366	3246	-9.09974	-2.6119	1029	-10	-1	0	0
kumwang07_김동철	8	2007-10-28	06:47:00	127	76	2	407	3287	13.8932	7.41184	41	23	10	0	0
kumwang07_김동철	9	2007-10-29	08:59:00	113	68	3	539	4859	-0.379458	0.322088	1572	-14	-8	0	0
kumwang07_김동철	10	2007-10-29	22:57:00	111	70	3	1377	5697	-2.52478	2.80732	838	-2	2	0	0
kumwang07_김동철	11	2007-10-30	06:33:00	106	66	4	393	6153	-7.60386	-0.928637	456	-5	-4	0	0
kumwang07_김동철	12	2007-10-30	08:24:00	123	64	4	504	6264	9.37689	-2.86436	111	17	-2	0	0
Result	nx	reading.date	reading.time	sbp	dbp	day	minutes	time	res.sbp	res.dbp	dtime	dsbp	ddbp	sbp.bi	dbp.bi
kumwang08_김문순	1	2007-12-03	11:19:00	170	115	0	679	679	20.5053	9.38226	NA	NA	NA	1	1
kumwang08_김문순	2	2007-12-03	11:21:00	164	116	0	681	681	14.496	10.3783	2	-6	1	1	1
kumwang08_김문순	3	2007-12-03	21:08:00	148	105	0	1268	1268	-4.24896	-1.79674	587	-16	-11	1	1
kumwang08_김문순	4	2007-12-04	07:38:00	138	101	1	458	1898	-17.195	-7.05781	630	-10	-4	1	1
kumwang08_김문순	5	2007-12-04	21:08:00	154	103	1	1268	2708	-4.98274	-6.67919	810	16	2	1	1
kumwang08_김문순	6	2007-12-04	21:10:00	150	100	1	1270	2710	-8.99209	-9.68319	2	-4	-3	1	1
kumwang08_김문순	7	2007-12-05	06:43:00	151	107	2	403	3283	-10.6716	-3.83017	573	1	7	1	1
kumwang08_김문순	8	2007-12-05	06:44:00	150	112	2	404	3284	-11.6762	1.16783	1	-1	5	1	1
kumwang08_김문순	9	2007-12-05	17:41:00	174	115	2	1061	3941	9.25147	2.85272	657	24	3	1	1
kumwang08_김문순	10	2007-12-05	17:43:00	174	112	2	1063	3943	9.24211	-0.151287	2	0	-3	1	1
kumwang08_김문순	11	2007-12-05	20:18:00	161	112	2	1218	4098	-4.4827	-0.461551	155	-13	0	1	1
kumwang08_김문순	12	2007-12-05	20:20:00	152	107	2	1220	4100	-13.4921	-5.46555	2	-9	-5	1	1
kumwang08_김문순	13	2007-12-06	07:14:00	151	108	3	434	4754	-17.5503	-5.77467	654	-1	1	1	1
kumwang08_김문순	14	2007-12-06	07:15:00	147	103	3	435	4755	-21.555	-10.7767	1	-4	-5	1	1
kumwang08_김문순	15	2007-12-06	20:15:00	193	119	3	1215	5535	20.7975	3.66201	780	46	16	1	1
kumwang08_김문순	16	2007-12-06	20:16:00	187	120	3	1216	5536	14.7929	4.66	1	-6	1	1	1
kumwang08_김문순	17	2007-12-06	21:26:00	197	122	3	1286	5606	24.4655	6.51989	70	10	2	1	1
kumwang08_김문순	18	2007-12-06	21:28:00	194	125	3	1288	5608	21.4562	9.51588	2	-3	3	1	1
kumwang08_김문순	19	2007-12-06	22:56:00	195	127	3	1376	5696	22.0447	11.3397	88	1	2	1	1
kumwang08_김문순	20	2007-12-06	22:57:00	183	124	3	1377	5697	10.04	8.33773	1	-12	-3	1	1
kumwang08_김문순	21	2007-12-07	07:41:00	158	112	4	461	6221	-17.4104	-4.71116	524	-25	-12	1	1
kumwang08_김문순	22	2007-12-07	07:42:00	157	110	4	462	6222	-18.415	-6.71316	1	-1	-2	1	1
kumwang08_김문순	23	2007-12-07	07:43:00	159	112	4	463	6223	-16.4197	-4.71516	1	2	2	1	1
Result	nx	reading.date	reading.time	sbp	dbp	day	minutes	time	res.sbp	res.dbp	dtime	dsbp	ddbp	sbp.bi	dbp.bi
kumwang09_김순엽	1	2007-10-18	11:54:00	152	98	0	714	714	-4.66953	-0.687353	NA	NA	NA	1	1
kumwang09_김순엽	2	2007-10-18	11:56:00	148	96	0	716	716	-8.6684	-2.68895	2	-4	-2	1	1
kumwang09_김순엽	3	2007-10-18	19:29:00	171	108	0	1169	1169	14.5876	8.94917	453	23	12	1	1
kumwang09_김순엽	4	2007-10-18	19:31:00	172	107	0	1171	1171	15.5888	7.94757	2	1	-1	1	1
kumwang09_김순엽	5	2007-10-18	19:33:00	162	99	0	1173	1173	5.5899	-0.054027	2	-10	-8	1	1
kumwang09_김순엽	6	2007-10-19	05:06:00	152	108	1	306	1746	-4.08623	8.48823	573	-10	9	1	1
kumwang09_김순엽	7	2007-10-19	05:07:00	164	104	1	307	1747	7.91433	4.48743	1	12	-4	1	1
kumwang09_김순엽	8	2007-10-19	05:09:00	159	99	1	309	1749	2.91546	-0.514167	2	-5	-5	1	1
kumwang09_김순엽	9	2007-10-19	09:25:00	140	94	1	565	2005	-15.9398	-5.71867	256	-19	-5	1	1
kumwang09_김순엽	10	2007-10-19	23:52:00	144	94	1	1432	2872	-11.4498	-6.41128	867	4	0	1	1
kumwang09_김순엽	11	2007-10-19	23:53:00	152	91	1	1433	2873	-3.44925	-9.41208	1	8	-3	1	1
kumwang09_김순엽	12	2007-10-19	23:54:00	156	94	1	1434	2874	0.55132	-6.41288	1	4	3	1	1
kumwang09_김순엽	13	2007-10-20	06:03:00	156	100	2	363	3243	0.759881	-0.707656	369	0	6	1	1
kumwang09_김순엽	14	2007-10-20	06:04:00	147	94	2	364	3244	-8.23955	-6.70845	1	-9	-6	1	1
kumwang09_김순엽	15	2007-10-22	01:30:00	148	99	4	90	5850	-5.76662	-3.79027	2606	1	5	1	1
kumwang09_김순엽	16	2007-10-22	01:31:00	155	95	4	91	5851	1.23394	-7.79107	1	7	-4	1	1
kumwang09_김순엽	17	2007-10-22	05:34:00	160	130	4	334	6094	6.37129	27.0148	243	5	35	1	1
kumwang09_김순엽	18	2007-10-22	05:35:00	168	97	4	335	6095	14.3719	-5.98599	1	8	-33	1	1
kumwang09_김순엽	19	2007-10-22	05:58:00	146	103	4	358	6118	-7.61515	-0.00436228	23	-22	6	1	1
Result	nx	reading.date	reading.time	sbp	dbp	day	minutes	time	res.sbp	res.dbp	dtime	dsbp	ddbp	sbp.bi	dbp.bi
kumwang10_김순임	1	2007-11-08	15:28:00	112	84	0	928	928	-2.77629	1.48268	NA	NA	NA	0	0
kumwang10_김순임	2	2007-11-08	20:32:00	125	88	0	1232	1232	10.8473	5.80185	304	13	4	0	1
kumwang10_김순임	3	2007-11-08	20:38:00	126	90	0	1238	1238	11.8596	7.80815	6	1	2	0	1
kumwang10_김순임	4	2007-11-09	06:48:00	115	81	1	408	1848	2.11074	-0.55141	610	-11	-9	0	0
kumwang10_김순임	5	2007-11-09	06:50:00	104	80	1	410	1850	-8.88516	-1.54931	2	-11	-1	0	0
kumwang10_김순임	6	2007-11-09	21:07:00	110	79	1	1267	2707	-1.12736	-1.64954	857	6	-1	0	0
kumwang10_김순임	7	2007-11-09	21:08:00	111	76	1	1268	2708	-0.125304	-4.6485	1	1	-3	0	0
kumwang10_김순임	8	2007-11-10	07:20:00	106	80	2	440	3320	-3.87002	-0.00595545	612	-5	4	0	0
kumwang10_김순임	9	2007-11-10	07:22:00	111	79	2	442	3322	1.13408	-1.00386	2	5	-1	0	0
kumwang10_김순임	10	2007-11-10	20:14:00	109	78	2	1214	4094	0.71754	-1.19333	772	-2	-1	0	0
kumwang10_김순임	11	2007-11-10	20:16:00	100	73	2	1216	4096	-8.27836	-6.19123	2	-9	-5	0	0
kumwang10_김순임	12	2007-11-11	07:08:00	96	72	3	428	4748	-10.941	-6.5067	652	-4	-1	0	0
kumwang10_김순임	13	2007-11-11	07:10:00	94	75	3	430	4750	-12.9369	-3.5046	2	-2	3	0	0
kumwang10_김순임	14	2007-11-11	22:24:00	112	83	3	1344	5664	6.93779	5.45501	914	18	8	0	0
kumwang10_김순임	15	2007-11-11	22:26:00	113	75	3	1346	5666	7.94189	-2.54289	2	1	-8	0	0
kumwang10_김순임	16	2007-11-12	07:00:00	105	76	4	420	6180	0.996165	-1.00324	514	-8	1	0	0
kumwang10_김순임	17	2007-11-12	07:01:00	96	75	4	421	6181	-8.00178	-2.00219	1	-9	-1	0	0
kumwang10_김순임	18	2007-11-12	21:04:00	108	80	4	1264	7024	5.72731	3.88288	843	12	5	0	0
kumwang10_김순임	19	2007-11-12	21:05:00	108	79	4	1265	7025	5.72936	2.88393	1	0	-1	0	0
kumwang10_김순임	20	2007-11-13	07:09:00	101	78	5	429	7629	-0.0317708	2.51807	604	-7	-1	0	0
kumwang10_김순임	21	2007-11-13	07:11:00	104	78	5	431	7631	2.97233	2.52017	2	3	0	0	0
Result	nx	reading.date	reading.time	sbp	dbp	day	minutes	time	res.sbp	res.dbp	dtime	dsbp	ddbp	sbp.bi	dbp.bi
kumwang11_김양래	1	2007-10-25	19:54:00	92	47	0	1194	1194	-11.3804	-13.1923	NA	NA	NA	0	0
kumwang11_김양래	2	2007-10-25	19:55:00	98	48	0	1195	1195	-5.37995	-12.1937	1	6	1	0	0
kumwang11_김양래	3	2007-10-26	05:26:00	101	66	1	326	1766	-2.10558	5.03557	571	3	18	0	0
kumwang11_김양래	4	2007-10-26	19:17:00	105	56	1	1157	2597	2.29372	-6.08617	831	4	-10	0	0
kumwang11_김양래	5	2007-10-26	19:18:00	107	60	1	1158	2598	4.2942	-2.08752	1	2	4	0	0
kumwang11_김양래	6	2007-10-27	05:56:00	120	75	2	356	3236	17.6008	12.0513	638	13	15	0	0
kumwang11_김양래	7	2007-10-27	05:57:00	115	76	2	357	3237	12.6012	13.0499	1	-5	1	0	0
kumwang11_김양래	8	2007-10-27	22:15:00	100	71	2	1335	4215	-1.92881	6.72974	978	-15	-5	0	0
kumwang11_김양래	9	2007-10-27	22:17:00	98	65	2	1337	4217	-3.92785	0.727039	2	-2	-6	0	0
kumwang11_김양래	10	2007-10-28	05:47:00	96	68	3	347	4667	-5.71162	3.1196	450	-2	3	0	0
kumwang11_김양래	11	2007-10-28	05:47:00	96	67	3	347	4667	-5.71162	2.1196	0	0	-1	0	0
kumwang11_김양래	12	2007-10-29	06:29:00	98	67	4	389	6149	-2.99951	0.119089	1482	2	0	0	0
kumwang11_김양래	13	2007-10-29	06:29:00	100	69	4	389	6149	-0.999506	2.11909	0	2	2	0	0
kumwang11_김양래	14	2007-10-29	20:06:00	101	72	4	1206	6966	0.39307	4.01624	817	1	3	0	0
kumwang11_김양래	15	2007-10-29	20:08:00	108	65	4	1208	6968	7.39403	-2.98646	2	7	-7	0	0
kumwang11_김양래	16	2007-10-30	06:18:00	105	76	5	378	7578	4.68714	7.19012	610	-3	11	0	0
kumwang11_김양래	17	2007-10-30	06:20:00	102	73	5	380	7580	1.6881	4.18742	2	-3	-3	0	0
kumwang11_김양래	18	2007-10-30	20:29:00	96	58	5	1229	8429	-3.90394	-11.9586	849	-6	-15	0	0
kumwang11_김양래	19	2007-10-30	20:30:00	93	58	5	1230	8430	-6.90346	-11.96	1	-3	0	0	0
Result	nx	reading.date	reading.time	sbp	dbp	day	minutes	time	res.sbp	res.dbp	dtime	dsbp	ddbp	sbp.bi	dbp.bi
kumwang12_김영래	1	2007-11-08	18:09:00	149	88	0	1089	1089	16.2594	11.5317	NA	NA	NA	1	1
kumwang12_김영래	2	2007-11-09	08:27:00	143	91	1	507	1947	9.61832	14.1835	858	-6	3	1	1
kumwang12_김영래	3	2007-11-09	08:29:00	141	83	1	509	1949	7.61683	6.18268	2	-2	-8	1	0
kumwang12_김영래	4	2007-11-09	21:02:00	128	67	1	1262	2702	-5.94576	-10.123	753	-13	-16	0	0
kumwang12_김영래	5	2007-11-09	21:04:00	133	70	1	1264	2704	-0.947251	-7.12377	2	5	3	0	0
kumwang12_김영래	6	2007-11-09	21:07:00	132	75	1	1267	2707	-1.94949	-2.12499	3	-1	5	0	0
kumwang12_김영래	7	2007-11-10	06:17:00	145	81	2	377	3257	10.6396	3.65177	550	13	6	1	0
kumwang12_김영래	8	2007-11-10	06:18:00	140	83	2	378	3258	5.63884	5.65136	1	-5	2	1	0
kumwang12_김영래	9	2007-11-10	22:30:00	100	60	2	1350	4230	-35.0874	-17.7432	972	-40	-23	0	0
kumwang12_김영래	10	2007-11-10	22:31:00	96	58	2	1351	4231	-39.0881	-19.7436	1	-4	-2	0	0
kumwang12_김영래	11	2007-11-11	20:26:00	138	71	3	1226	5546	1.92942	-7.27732	1315	42	13	1	0
kumwang12_김영래	12	2007-11-12	07:33:00	140	81	4	453	6213	3.43109	2.45195	667	2	10	1	0
kumwang12_김영래	13	2007-11-12	07:35:00	149	81	4	455	6215	12.4296	2.45114	2	9	0	1	0
kumwang12_김영래	14	2007-11-12	21:07:00	132	78	4	1267	7027	-5.17707	-0.878443	812	-17	-3	0	0
kumwang12_김영래	15	2007-11-12	21:09:00	130	77	4	1269	7029	-7.17857	-1.87925	2	-2	-1	0	0
kumwang12_김영래	16	2007-11-13	06:25:00	151	93	5	385	7585	13.406	13.8951	556	21	16	1	1
kumwang12_김영래	17	2007-11-13	06:27:00	152	86	5	387	7587	14.4045	6.89426	2	1	-7	1	1
Result	nx	reading.date	reading.time	sbp	dbp	day	minutes	time	res.sbp	res.dbp	dtime	dsbp	ddbp	sbp.bi	dbp.bi
kumwang13_김옥자	1	2007-10-11	14:56:00	140	82	0	896	896	11.6158	0.131481	NA	NA	NA	1	0
kumwang13_김옥자	2	2007-10-11	21:28:00	144	90	0	1288	1288	14.2044	7.11148	392	4	8	1	1
kumwang13_김옥자	3	2007-10-11	21:30:00	120	84	0	1290	1290	-9.80284	1.10627	2	-24	-6	0	0
kumwang13_김옥자	4	2007-10-12	06:44:00	156	95	1	404	1844	24.2025	10.6647	554	36	11	1	1
kumwang13_김옥자	5	2007-10-12	06:47:00	128	85	1	407	1847	-3.80831	0.656927	3	-28	-10	0	1
kumwang13_김옥자	6	2007-10-12	20:41:00	126	84	1	1241	2681	-8.81112	-2.51319	834	-2	-1	0	0
kumwang13_김옥자	7	2007-10-12	20:43:00	123	79	1	1243	2683	-11.8183	-7.51839	2	-3	-5	0	0
kumwang13_김옥자	8	2007-10-13	06:46:00	134	85	2	406	3286	-2.98942	-3.08743	603	11	6	0	1
kumwang13_김옥자	9	2007-10-13	06:49:00	121	80	2	409	3289	-16.0002	-8.09524	3	-13	-5	0	0
kumwang13_김옥자	10	2007-10-13	22:29:00	136	83	2	1349	4229	-4.38468	-7.54117	940	15	3	1	0
kumwang13_김옥자	11	2007-10-13	22:32:00	125	82	2	1352	4232	-15.3955	-8.54897	3	-11	-1	0	0
kumwang13_김옥자	12	2007-10-14	07:00:00	154	94	3	420	4740	11.7755	2.12918	508	29	12	1	1
kumwang13_김옥자	13	2007-10-14	07:02:00	140	93	3	422	4742	-2.23174	1.12398	2	-14	-1	1	1
kumwang13_김옥자	14	2007-10-14	21:53:00	140	86	3	1313	5633	-5.43977	-8.19445	891	0	-7	1	1
kumwang13_김옥자	15	2007-10-14	21:55:00	128	80	3	1315	5635	-17.447	-14.1997	2	-12	-6	0	0
kumwang13_김옥자	16	2007-10-15	06:52:00	149	88	4	412	6172	1.61956	-7.59696	537	21	8	1	1
kumwang13_김옥자	17	2007-10-15	21:15:00	168	108	4	1275	7035	17.5123	10.1575	863	19	20	1	1
kumwang13_김옥자	18	2007-10-15	21:16:00	176	152	4	1276	7036	25.5087	54.1549	1	8	44	1	1
kumwang13_김옥자	19	2007-10-17	18:43:00	152	85	6	1123	9763	-8.3098	-19.9409	2727	-24	-67	1	1
Result	nx	reading.date	reading.time	sbp	dbp	day	minutes	time	res.sbp	res.dbp	dtime	dsbp	ddbp	sbp.bi	dbp.bi
kumwang14_김왕래	1	2007-10-25	21:43:00	100	67	0	1303	1303	-17.9024	-11.4078	NA	NA	NA	0	0
kumwang14_김왕래	2	2007-10-25	21:44:00	104	70	0	1304	1304	-13.9029	-8.40903	1	4	3	0	0
kumwang14_김왕래	3	2007-10-26	05:02:00	134	86	1	302	1742	15.8819	7.05085	438	30	16	0	1
kumwang14_김왕래	4	2007-10-26	05:04:00	120	81	1	304	1744	1.88088	2.04839	2	-14	-5	0	0
kumwang14_김왕래	5	2007-10-26	22:02:00	116	72	1	1322	2762	-2.61929	-8.20694	1018	-4	-9	0	0
kumwang14_김왕래	6	2007-10-26	22:03:00	108	73	1	1323	2763	-10.6198	-7.20818	1	-8	1	0	0
kumwang14_김왕래	7	2007-10-27	04:10:00	122	87	2	250	3130	3.1999	6.33926	367	14	14	0	1
kumwang14_김왕래	8	2007-10-27	04:11:00	118	84	2	251	3131	-0.800587	3.33803	1	-4	-3	0	0
kumwang14_김왕래	9	2007-10-27	21:44:00	152	88	2	1304	4184	32.682	6.03954	1053	34	4	1	1
kumwang14_김왕래	10	2007-10-27	22:01:00	112	75	2	1321	4201	-7.32631	-6.98143	17	-40	-13	0	0
kumwang14_김왕래	11	2007-10-27	22:02:00	112	92	2	1322	4202	-7.3268	10.0173	1	0	17	0	1
kumwang14_김왕래	12	2007-10-28	05:15:00	132	91	3	315	4635	12.4605	8.48339	433	20	-1	0	1
kumwang14_김왕래	13	2007-10-28	05:15:00	131	89	3	315	4635	11.4605	6.48339	0	-1	-2	0	1
kumwang14_김왕래	14	2007-10-28	21:07:00	119	86	3	1267	5587	-1.00728	2.30945	952	-12	-3	0	1
kumwang14_김왕래	15	2007-10-28	21:08:00	117	86	3	1268	5588	-3.00777	2.30821	1	-2	0	0	1
kumwang14_김왕래	16	2007-10-29	05:59:00	128	93	4	359	6119	7.73133	8.65342	531	11	7	0	1
kumwang14_김왕래	17	2007-10-29	06:00:00	135	92	4	360	6120	14.7308	7.65219	1	7	-1	1	1
kumwang14_김왕래	18	2007-10-29	23:05:00	114	79	4	1385	7145	-6.77277	-6.61178	1025	-21	-13	0	0
kumwang14_김왕래	19	2007-10-29	23:06:00	110	80	4	1386	7146	-10.7733	-5.61301	1	-4	1	0	0
kumwang14_김왕래	20	2007-10-30	06:15:00	112	79	5	375	7575	-8.98404	-7.14203	429	2	-1	0	0
kumwang14_김왕래	21	2007-10-30	06:16:00	112	77	5	376	7576	-8.98453	-9.14326	1	0	-2	0	0
Result	nx	reading.date	reading.time	sbp	dbp	day	minutes	time	res.sbp	res.dbp	dtime	dsbp	ddbp	sbp.bi	dbp.bi
kumwang15_김인경	1	2007-11-19	15:04:00	105	58	0	904	904	-6.7596	-9.65218	NA	NA	NA	0	0
kumwang15_김인경	2	2007-11-19	15:05:00	100	57	0	905	905	-11.7595	-10.6527	1	-5	-1	0	0
kumwang15_김인경	3	2007-11-20	07:51:00	114	56	1	471	1911	2.35185	-12.1907	1006	14	-1	0	0
kumwang15_김인경	4	2007-11-20	07:52:00	98	64	1	472	1912	-13.648	-4.19126	1	-16	8	0	0
kumwang15_김인경	5	2007-11-20	19:40:00	132	87	1	1180	2620	20.4303	18.4301	708	34	23	0	1
kumwang15_김인경	6	2007-11-20	19:40:00	127	84	1	1180	2620	15.4303	15.4301	0	-5	-3	0	0
kumwang15_김인경	7	2007-11-21	07:50:00	114	73	2	470	3350	2.51113	4.0397	730	-13	-11	0	0
kumwang15_김인경	8	2007-11-21	07:51:00	108	76	2	471	3351	-3.48876	7.03917	1	-6	3	0	0
kumwang15_김인경	9	2007-11-21	19:50:00	114	76	2	1190	4070	2.59082	6.65465	719	6	0	0	0
kumwang15_김인경	10	2007-11-21	19:51:00	116	68	2	1191	4071	4.59093	-1.34589	1	2	-8	0	0
kumwang15_김인경	11	2007-11-23	19:28:00	104	63	4	1168	6928	-7.09285	-7.87381	2857	-12	-5	0	0
kumwang15_김인경	12	2007-11-23	19:28:00	103	64	4	1168	6928	-8.09285	-6.87381	0	-1	1	0	0
kumwang15_김인경	13	2007-11-25	09:04:00	114	76	6	544	9184	3.15685	3.91968	2256	11	12	0	0
kumwang15_김인경	14	2007-11-25	09:04:00	113	74	6	544	9184	2.15685	1.91968	0	-1	-2	0	0
kumwang15_김인경	15	2007-11-26	08:19:00	113	73	7	499	10579	2.31125	0.173639	1395	0	-1	0	0
kumwang15_김인경	16	2007-11-26	08:19:00	106	68	7	499	10579	-4.68875	-4.82636	0	-7	-5	0	0
Result	nx	reading.date	reading.time	sbp	dbp	day	minutes	time	res.sbp	res.dbp	dtime	dsbp	ddbp	sbp.bi	dbp.bi
kumwang16_김정순	1	2007-11-30	13:09:00	156	78	0	789	789	5.7214	-2.26872	NA	NA	NA	1	0
kumwang16_김정순	2	2007-11-30	13:11:00	152	82	0	791	791	1.72198	1.73254	2	-4	4	1	0
kumwang16_김정순	3	2007-11-30	21:03:00	148	74	0	1263	1263	-2.14178	-5.97142	472	-4	-8	1	0
kumwang16_김정순	4	2007-11-30	21:04:00	150	78	0	1264	1264	-0.141493	-1.97079	1	2	4	1	0
kumwang16_김정순	5	2007-12-01	07:01:00	144	80	1	421	1861	-5.96917	0.403653	597	-6	2	1	0
kumwang16_김정순	6	2007-12-01	07:03:00	137	77	1	423	1863	-12.9686	-2.59509	2	-7	-3	1	0
kumwang16_김정순	7	2007-12-01	21:03:00	171	94	1	1263	2703	21.2739	14.9318	840	34	17	1	1
kumwang16_김정순	8	2007-12-01	21:04:00	171	96	1	1264	2704	21.2742	16.9324	1	0	2	1	1
kumwang16_김정순	9	2007-12-02	07:07:00	142	77	2	427	3307	-7.55178	-1.6894	603	-29	-19	1	0
kumwang16_김정순	10	2007-12-02	07:08:00	130	76	2	428	3308	-19.5515	-2.68877	1	-12	-1	0	0
kumwang16_김정순	11	2007-12-02	20:57:00	143	71	2	1257	4137	-6.3122	-7.16882	829	13	-5	1	0
kumwang16_김정순	12	2007-12-02	20:58:00	141	68	2	1258	4138	-8.31191	-10.1682	1	-2	-3	1	0
kumwang16_김정순	13	2007-12-03	07:38:00	161	76	3	458	4778	11.8728	-1.76678	640	20	8	1	0
kumwang16_김정순	14	2007-12-03	07:39:00	147	80	3	459	4779	-2.12689	2.23385	1	-14	4	1	0
kumwang16_김정순	15	2007-12-03	21:03:00	147	76	3	1263	5583	-1.89481	-1.26187	804	0	-4	1	0
kumwang16_김정순	16	2007-12-03	21:05:00	151	71	3	1265	5585	2.10577	-6.26062	2	4	-5	1	0
kumwang16_김정순	17	2007-12-04	07:25:00	154	78	4	445	6205	5.28473	1.12825	620	3	7	1	0
kumwang16_김정순	18	2007-12-04	07:26:00	152	78	4	446	6206	3.28502	1.12888	1	-2	0	1	0
kumwang16_김정순	19	2007-12-04	21:04:00	145	78	4	1264	7024	-3.47886	1.64194	818	-7	0	1	0
kumwang16_김정순	20	2007-12-04	21:05:00	137	75	4	1265	7025	-11.4786	-1.35744	1	-8	-3	1	0
kumwang16_김정순	21	2007-12-05	07:02:00	157	77	5	422	7622	8.69375	1.01701	597	20	2	1	0
kumwang16_김정순	22	2007-12-05	07:03:00	149	80	5	423	7623	0.694038	4.01763	1	-8	3	1	0
Result	nx	reading.date	reading.time	sbp	dbp	day	minutes	time	res.sbp	res.dbp	dtime	dsbp	ddbp	sbp.bi	dbp.bi
kumwang17_김종혁	1	2007-10-11	21:15:00	104	80	0	1275	1275	-14.4844	2.54079	NA	NA	NA	0	0
kumwang17_김종혁	2	2007-10-11	21:16:00	124	73	0	1276	1276	5.5147	-4.45893	1	20	-7	0	0
kumwang17_김종혁	3	2007-10-12	07:28:00	133	79	1	448	1888	13.9842	1.71619	612	9	6	0	0
kumwang17_김종혁	4	2007-10-12	07:30:00	120	87	1	450	1890	0.982428	9.71676	2	-13	8	0	1
kumwang17_김종혁	5	2007-10-12	20:56:00	114	72	1	1256	2696	-5.71629	-5.05262	806	-6	-15	0	0
kumwang17_김종혁	6	2007-10-12	20:58:00	110	70	1	1258	2698	-9.71802	-7.05204	2	-4	-2	0	0
kumwang17_김종혁	7	2007-10-13	06:07:00	129	89	2	367	3247	8.80606	12.105	549	19	19	0	1
kumwang17_김종혁	8	2007-10-13	06:08:00	140	79	2	368	3248	19.8052	2.10533	1	11	-10	1	0
kumwang17_김종혁	9	2007-10-13	23:30:00	114	75	2	1410	4290	-7.09811	-1.59652	1042	-26	-4	0	0
kumwang17_김종혁	10	2007-10-13	23:31:00	121	76	2	1411	4291	-0.0989791	-0.596234	1	7	1	0	0
kumwang17_김종혁	11	2007-10-14	06:16:00	130	80	3	376	4696	8.54993	3.51965	405	9	4	0	0
kumwang17_김종혁	12	2007-10-14	06:18:00	129	79	3	378	4698	7.5482	2.52022	2	-1	-1	0	0
kumwang17_김종혁	13	2007-10-14	21:37:00	99	61	3	1297	5617	-23.2485	-15.2168	919	-30	-18	0	0
kumwang17_김종혁	14	2007-10-14	21:39:00	102	61	3	1299	5619	-20.2502	-15.2162	2	3	0	0	0
kumwang17_김종혁	15	2007-10-16	08:31:00	120	80	5	511	7711	-4.06375	4.38234	2092	18	19	0	0
kumwang17_김종혁	16	2007-10-16	08:33:00	127	81	5	513	7713	2.93452	5.38291	2	7	1	0	0
kumwang17_김종혁	17	2007-10-16	21:11:00	142	80	5	1271	8471	17.2774	4.5998	758	15	-1	1	0
kumwang17_김종혁	18	2007-10-16	21:13:00	124	76	5	1273	8473	-0.72432	0.600375	2	-18	-4	0	0
Result	nx	reading.date	reading.time	sbp	dbp	day	minutes	time	res.sbp	res.dbp	dtime	dsbp	ddbp	sbp.bi	dbp.bi
kumwang18_김형수	1	2007-10-04	14:22:00	127	68	0	862	862	-4.16493	-8.31699	NA	NA	NA	0	0
kumwang18_김형수	2	2007-10-04	23:07:00	132	79	0	1387	1387	0.866281	1.85261	525	5	11	0	0
kumwang18_김형수	3	2007-10-05	09:02:00	138	79	1	542	1982	6.90165	0.911483	595	6	0	1	0
kumwang18_김형수	4	2007-10-05	13:57:00	140	91	1	837	2277	8.91919	12.4449	295	2	12	1	1
kumwang18_김형수	5	2007-10-05	21:15:00	120	75	1	1275	2715	-11.0548	-4.24792	438	-20	-16	0	0
kumwang18_김형수	6	2007-10-06	06:20:00	124	78	2	380	3260	-7.02236	-2.10996	545	4	3	0	0
kumwang18_김형수	7	2007-10-06	08:31:00	140	81	2	511	3391	8.98542	0.682834	131	16	3	1	0
kumwang18_김형수	8	2007-10-06	14:45:00	126	78	2	885	3765	-4.99234	-2.90873	374	-14	-3	0	0
kumwang18_김형수	9	2007-10-06	22:09:00	111	72	2	1329	4209	-19.9659	-9.61102	444	-15	-6	0	0
kumwang18_김형수	10	2007-10-07	06:22:00	133	79	3	382	4702	2.06336	-3.39081	493	22	7	0	0
kumwang18_김형수	11	2007-10-07	10:58:00	136	80	3	658	4978	5.07977	-2.82736	276	3	1	1	0
kumwang18_김형수	12	2007-10-07	15:21:00	129	79	3	921	5241	-1.90459	-4.24336	263	-7	-1	0	0
kumwang18_김형수	13	2007-10-07	21:04:00	129	80	3	1264	5584	-1.8842	-3.78589	343	0	1	0	0
kumwang18_김형수	14	2007-10-08	06:07:00	168	144	4	367	6127	37.1481	59.3552	543	39	64	1	1
kumwang18_김형수	15	2007-10-08	08:27:00	133	80	4	507	6267	2.15641	-4.8662	140	-35	-64	0	0
kumwang18_김형수	16	2007-10-08	12:57:00	135	83	4	777	6537	4.17246	-2.29327	270	2	3	1	0
kumwang18_김형수	17	2007-10-08	21:07:00	120	80	4	1267	7027	-10.7984	-6.06831	490	-15	-3	0	0
kumwang18_김형수	18	2007-10-09	06:20:00	124	76	5	380	7580	-6.76553	-10.943	553	4	-4	0	0
kumwang18_김형수	19	2007-10-09	13:37:00	123	78	5	817	8017	-7.73955	-9.63422	437	-1	2	0	0
Result	nx	reading.date	reading.time	sbp	dbp	day	minutes	time	res.sbp	res.dbp	dtime	dsbp	ddbp	sbp.bi	dbp.bi
kumwang19_도갑순	1	2007-10-05	17:35:00	120	82	0	1055	1055	3.5775	-0.368898	NA	NA	NA	0	0
kumwang19_도갑순	2	2007-10-05	22:22:00	115	85	0	1342	1342	-1.51828	2.59873	287	-5	3	0	1
kumwang19_도갑순	3	2007-10-06	06:46:00	122	90	1	406	1846	5.31353	7.54188	504	7	5	0	1
kumwang19_도갑순	4	2007-10-06	09:25:00	114	79	1	565	2005	-2.73954	-3.47606	159	-8	-11	0	0
kumwang19_도갑순	5	2007-10-06	19:08:00	110	78	1	1148	2588	-6.9341	-4.54182	583	-4	-1	0	0
kumwang19_도갑순	6	2007-10-06	21:56:00	108	77	1	1316	2756	-8.99016	-5.56077	168	-2	-1	0	0
kumwang19_도갑순	7	2007-10-07	05:20:00	122	88	2	320	3200	4.86166	5.38915	444	14	11	0	1
kumwang19_도갑순	8	2007-10-07	09:12:00	114	78	2	552	3432	-3.21576	-4.63702	232	-8	-10	0	0
kumwang19_도갑순	9	2007-10-07	18:36:00	120	88	2	1116	3996	2.59602	5.29936	564	6	10	0	1
kumwang19_도갑순	10	2007-10-07	21:04:00	111	75	2	1264	4144	-6.45337	-7.71734	148	-9	-13	0	0
kumwang19_도갑순	11	2007-10-08	06:13:00	133	91	3	373	4693	15.3634	8.22073	549	22	16	0	1
kumwang19_도갑순	12	2007-10-08	09:07:00	128	83	3	547	4867	10.3053	0.201107	174	-5	-8	0	0
kumwang19_도갑순	13	2007-10-08	18:52:00	108	79	3	1132	5452	-9.88988	-3.86488	585	-20	-4	0	0
kumwang19_도갑순	14	2007-10-08	21:12:00	114	81	3	1272	5592	-3.9366	-1.88067	140	6	2	0	0
kumwang19_도갑순	15	2007-10-09	06:15:00	119	85	4	375	6135	0.882187	2.05808	543	5	4	0	1
kumwang19_도갑순	16	2007-10-09	08:59:00	121	79	4	539	6299	2.82746	-3.96042	164	2	-6	0	0
kumwang19_도갑순	17	2007-10-09	18:11:00	125	88	4	1091	6851	6.64324	4.97731	552	4	9	0	1
kumwang19_도갑순	18	2007-10-09	22:57:00	118	83	4	1377	7137	-0.452203	-0.0549508	286	-7	-5	0	0
kumwang19_도갑순	19	2007-10-10	05:26:00	116	88	5	326	7526	-2.58202	4.90117	389	-2	5	0	1
kumwang19_도갑순	20	2007-10-10	09:15:00	113	78	5	555	7755	-5.65844	-5.12466	229	-3	-10	0	0
Result	nx	reading.date	reading.time	sbp	dbp	day	minutes	time	res.sbp	res.dbp	dtime	dsbp	ddbp	sbp.bi	dbp.bi
kumwang20_민영신	1	2007-11-02	16:34:00	148	106	0	994	994	3.53769	8.3117	NA	NA	NA	1	1
kumwang20_민영신	2	2007-11-02	16:36:00	143	103	0	996	996	-1.46232	5.31324	2	-5	-3	1	1
kumwang20_민영신	3	2007-11-02	21:58:00	156	92	0	1318	1318	11.5362	-5.43803	322	13	-11	1	1
kumwang20_민영신	4	2007-11-02	22:00:00	151	104	0	1320	1320	6.53621	6.56352	2	-5	12	1	1
kumwang20_민영신	5	2007-11-03	06:02:00	147	100	1	362	1802	2.53401	2.93584	482	-4	-4	1	1
kumwang20_민영신	6	2007-11-03	06:04:00	141	99	1	364	1804	-3.46599	1.93738	2	-6	-1	1	1
kumwang20_민영신	7	2007-11-03	21:06:00	132	88	1	1266	2706	-12.4701	-8.36587	902	-9	-11	0	1
kumwang20_민영신	8	2007-11-03	21:08:00	128	84	1	1268	2708	-16.4701	-12.3643	2	-4	-4	0	0
kumwang20_민영신	9	2007-11-04	08:02:00	148	94	2	482	3362	3.52691	-1.85915	654	20	10	1	1
kumwang20_민영신	10	2007-11-04	08:03:00	151	100	2	483	3363	6.52691	4.14162	1	3	6	1	1
kumwang20_민영신	11	2007-11-04	21:56:00	136	92	2	1316	4196	-8.47689	-3.21493	833	-15	-8	1	1
kumwang20_민영신	12	2007-11-04	21:58:00	136	93	2	1318	4198	-8.4769	-2.21338	2	0	1	1	1
kumwang20_민영신	13	2007-11-05	06:04:00	145	104	3	364	4684	0.520889	9.16203	486	9	11	1	1
kumwang20_민영신	14	2007-11-05	06:07:00	168	93	3	367	4687	23.5209	-1.83566	3	23	-11	1	1
kumwang20_민영신	15	2007-11-05	21:51:00	133	85	3	1311	5631	-11.4834	-9.10647	944	-35	-8	0	1
kumwang20_민영신	16	2007-11-05	21:53:00	140	86	3	1313	5633	-4.48343	-8.10492	2	7	1	1	1
kumwang20_민영신	17	2007-11-06	06:11:00	143	96	4	371	6131	-1.4857	2.27975	498	3	10	1	1
kumwang20_민영신	18	2007-11-06	06:13:00	147	93	4	373	6133	2.51429	-0.7187	2	4	-3	1	1
kumwang20_민영신	19	2007-11-07	06:28:00	144	91	5	388	7588	-0.492336	-1.59479	1455	-3	-2	1	1
kumwang20_민영신	20	2007-11-07	06:30:00	141	96	5	390	7590	-3.49234	3.40675	2	-3	5	1	1
kumwang20_민영신	21	2007-11-07	14:13:00	156	103	5	853	8053	11.5055	10.7644	463	15	7	1	1
Result	nx	reading.date	reading.time	sbp	dbp	day	minutes	time	res.sbp	res.dbp	dtime	dsbp	ddbp	sbp.bi	dbp.bi
kumwang21_박건영	1	2007-11-09	12:48:00	157	100	0	768	768	12.6745	10.5676	NA	NA	NA	1	1
kumwang21_박건영	2	2007-11-09	22:32:00	133	78	0	1352	1352	-12.994	-12.5876	584	-24	-22	0	0
kumwang21_박건영	3	2007-11-09	22:34:00	125	76	0	1354	1354	-20.9997	-14.5915	2	-8	-2	0	0
kumwang21_박건영	4	2007-11-10	07:50:00	168	107	1	470	1910	20.4117	15.3086	556	43	31	1	1
kumwang21_박건영	5	2007-11-10	07:52:00	166	104	1	472	1912	18.406	12.3047	2	-2	-3	1	1
kumwang21_박건영	6	2007-11-10	22:18:00	127	72	1	1338	2778	-23.0682	-21.4084	866	-39	-32	0	0
kumwang21_박건영	7	2007-11-10	22:20:00	118	71	1	1340	2780	-32.0739	-22.4123	2	-9	-1	0	0
kumwang21_박건영	8	2007-11-11	09:47:00	155	96	2	587	3467	2.96329	1.22869	687	37	25	1	1
kumwang21_박건영	9	2007-11-11	22:06:00	135	84	2	1326	4206	-19.1481	-12.2331	739	-20	-12	1	0
kumwang21_박건영	10	2007-11-11	22:08:00	125	83	2	1328	4208	-29.1538	-13.2371	2	-10	-1	0	0
kumwang21_박건영	11	2007-11-12	22:40:00	178	113	3	1360	5680	19.6406	13.8511	1472	53	30	1	1
kumwang21_박건영	12	2007-11-12	22:42:00	176	112	3	1362	5682	17.6349	12.8472	2	-2	-1	1	1
kumwang21_박건영	13	2007-11-13	06:57:00	191	118	4	417	6177	31.2207	17.868	495	15	6	1	1
kumwang21_박건영	14	2007-11-13	06:59:00	181	126	4	419	6179	21.2149	25.864	2	-10	8	1	1
kumwang21_박건영	15	2007-11-13	22:00:00	183	113	4	1320	7080	20.6407	11.0817	901	2	-13	1	1
kumwang21_박건영	16	2007-11-13	22:02:00	176	105	4	1322	7082	13.635	3.07778	2	-7	-8	1	1
kumwang21_박건영	17	2007-11-14	07:48:00	173	109	5	468	7668	8.96079	5.91861	586	-3	4	1	1
kumwang21_박건영	18	2007-11-15	22:01:00	156	103	6	1321	9961	-14.5905	-4.61722	2293	-17	-6	1	1
kumwang21_박건영	19	2007-11-16	08:50:00	172	109	7	530	10610	-0.444684	0.0989795	649	16	6	1	1
kumwang21_박건영	20	2007-11-16	17:30:00	139	81	7	1050	11130	-34.9304	-28.9296	520	-33	-28	1	0
Result	nx	reading.date	reading.time	sbp	dbp	day	minutes	time	res.sbp	res.dbp	dtime	dsbp	ddbp	sbp.bi	dbp.bi
kumwang22_박명섭	1	2007-10-11	22:32:00	105	71	0	1352	1352	-4.91205	-4.43653	NA	NA	NA	0	0
kumwang22_박명섭	2	2007-10-11	22:35:00	108	72	0	1355	1355	-1.913	-3.43682	3	3	1	0	0
kumwang22_박명섭	3	2007-10-12	05:41:00	102	84	1	341	1781	-8.04731	8.52115	426	-6	12	0	0
kumwang22_박명섭	4	2007-10-12	05:44:00	116	80	1	344	1784	5.95175	4.52085	3	14	-4	0	0
kumwang22_박명섭	5	2007-10-12	20:52:00	112	71	1	1252	2692	1.66548	-4.56872	908	-4	-9	0	0
kumwang22_박명섭	6	2007-10-12	20:54:00	109	72	1	1254	2694	-1.33515	-3.56892	2	-3	1	0	0
kumwang22_박명섭	7	2007-10-13	06:14:00	111	81	2	374	3254	0.488294	5.37583	560	2	9	0	0
kumwang22_박명섭	8	2007-10-13	06:16:00	118	79	2	376	3256	7.48766	3.37563	2	7	-2	0	0
kumwang22_박명섭	9	2007-10-13	21:44:00	111	70	2	1304	4184	0.195087	-5.71592	928	-7	-9	0	0
kumwang22_박명섭	10	2007-10-13	21:46:00	115	75	2	1306	4186	4.19446	-0.716116	2	4	5	0	0
kumwang22_박명섭	11	2007-10-14	05:54:00	112	73	3	354	4674	1.0406	-2.76426	488	-3	-2	0	0
kumwang22_박명섭	12	2007-10-14	05:56:00	116	76	3	356	4676	5.03997	0.235543	2	4	3	0	0
kumwang22_박명섭	13	2007-10-15	06:39:00	107	79	4	399	6159	-4.42758	3.08924	1483	-9	3	0	0
kumwang22_박명섭	14	2007-10-15	06:41:00	106	76	4	401	6161	-5.42821	0.0890397	2	-1	-3	0	0
Result	nx	reading.date	reading.time	sbp	dbp	day	minutes	time	res.sbp	res.dbp	dtime	dsbp	ddbp	sbp.bi	dbp.bi
kumwang23_박명숙	1	2007-10-25	15:36:00	134	88	0	936	936	11.815	7.37831	NA	NA	NA	0	1
kumwang23_박명숙	2	2007-10-25	15:38:00	136	87	0	938	938	13.8141	6.37919	2	2	-1	1	1
kumwang23_박명숙	3	2007-10-25	19:58:00	118	80	0	1198	1198	-4.29617	-0.506977	260	-18	-7	0	0
kumwang23_박명숙	4	2007-10-25	19:59:00	120	76	0	1199	1199	-2.2966	-4.50654	1	2	-4	0	0
kumwang23_박명숙	5	2007-10-26	05:24:00	103	69	1	324	1764	-19.5363	-11.2592	565	-17	-7	0	0
kumwang23_박명숙	6	2007-10-26	05:30:00	132	80	1	330	1770	9.46118	-0.256538	6	29	11	0	0
kumwang23_박명숙	7	2007-10-26	05:32:00	128	79	1	332	1772	5.46033	-1.25566	2	-4	-1	0	0
kumwang23_박명숙	8	2007-10-26	22:25:00	140	86	1	1345	2785	17.0306	6.18786	1013	12	7	1	1
kumwang23_박명숙	9	2007-10-26	22:27:00	102	84	1	1347	2787	-20.9702	4.18874	2	-38	-2	0	0
kumwang23_박명숙	10	2007-10-27	05:51:00	120	74	2	351	3231	-3.15859	-5.61687	444	18	-10	0	0
kumwang23_박명숙	11	2007-10-27	05:53:00	112	74	2	353	3233	-11.1594	-5.61599	2	-8	0	0	0
kumwang23_박명숙	12	2007-10-27	22:18:00	120	84	2	1338	4218	-3.57728	4.81527	985	8	10	0	0
kumwang23_박명숙	13	2007-10-27	22:20:00	115	78	2	1340	4220	-8.57813	-1.18385	2	-5	-6	0	0
kumwang23_박명숙	14	2007-10-28	05:49:00	123	75	3	349	4669	-0.768603	-3.98727	449	8	-3	0	0
kumwang23_박명숙	15	2007-10-28	05:51:00	116	76	3	351	4671	-7.76945	-2.98639	2	-7	1	0	0
kumwang23_박명숙	16	2007-10-28	23:36:00	135	81	3	1416	5736	10.7788	2.4799	1065	19	5	1	0
kumwang23_박명숙	17	2007-10-28	23:39:00	142	89	3	1419	5739	17.7775	10.4812	3	7	8	1	1
kumwang23_박명숙	18	2007-10-29	06:36:00	120	79	4	396	6156	-4.3994	0.663787	417	-22	-10	0	0
kumwang23_박명숙	19	2007-10-29	06:37:00	117	74	4	397	6157	-7.39983	-4.33578	1	-3	-5	0	0
kumwang23_박명숙	20	2007-10-29	20:09:00	136	76	4	1209	6969	11.2557	-1.98026	812	19	2	1	0
kumwang23_박명숙	21	2007-10-29	20:10:00	127	79	4	1210	6970	2.25529	1.02018	1	-9	3	0	0
kumwang23_박명숙	22	2007-10-30	06:21:00	124	82	5	381	7581	-1.0039	4.2877	611	-3	3	0	0
kumwang23_박명숙	23	2007-10-30	06:22:00	122	78	5	382	7582	-3.00432	0.288133	1	-2	-4	0	0
kumwang23_박명숙	24	2007-10-30	20:32:00	124	77	5	1232	8432	-1.3649	-0.339711	850	2	-1	0	0
kumwang23_박명숙	25	2007-10-30	20:33:00	125	73	5	1233	8433	-0.365325	-4.33927	1	1	-4	0	0
Result	nx	reading.date	reading.time	sbp	dbp	day	minutes	time	res.sbp	res.dbp	dtime	dsbp	ddbp	sbp.bi	dbp.bi
kumwang24_박옥순	1	2007-10-18	11:59:00	135	86	0	719	719	1.72452	2.39683	NA	NA	NA	1	1
kumwang24_박옥순	2	2007-10-18	12:00:00	133	84	0	720	720	-0.27313	0.398014	1	-2	-2	0	0
kumwang24_박옥순	3	2007-10-19	06:42:00	138	88	1	402	1842	7.36069	5.72188	1122	5	4	1	1
kumwang24_박옥순	4	2007-10-19	06:43:00	125	80	1	403	1843	-5.63696	-2.27694	1	-13	-8	0	0
kumwang24_박옥순	5	2007-10-19	20:56:00	122	72	1	1256	2696	-6.6346	-9.27047	853	-3	-8	0	0
kumwang24_박옥순	6	2007-10-19	20:58:00	118	73	1	1258	2698	-10.6299	-8.26811	2	-4	1	0	0
kumwang24_박옥순	7	2007-10-20	07:00:00	124	79	2	420	3300	-3.21676	-1.5578	602	6	6	0	0
kumwang24_박옥순	8	2007-10-20	07:01:00	124	84	2	421	3301	-3.21441	3.44338	1	0	5	0	0
kumwang24_박옥순	9	2007-10-20	21:30:00	138	84	2	1290	4170	12.8255	4.46873	869	14	0	1	0
kumwang24_박옥순	10	2007-10-20	21:30:00	125	81	2	1290	4170	-0.17449	1.46873	0	-13	-3	0	0
kumwang24_박옥순	11	2007-10-21	06:21:00	128	81	3	381	4701	4.072	2.09527	531	3	0	0	0
kumwang24_박옥순	12	2007-10-21	06:22:00	127	84	3	382	4702	3.07434	5.09645	1	-1	3	0	0
kumwang24_박옥순	13	2007-10-21	21:41:00	131	80	3	1301	5621	9.23163	2.18079	919	4	-4	0	0
kumwang24_박옥순	14	2007-10-21	21:42:00	132	76	3	1302	5622	10.234	-1.81803	1	1	-4	0	0
kumwang24_박옥순	15	2007-10-22	07:07:00	120	73	4	427	6187	-0.439721	-4.15138	565	-12	-3	0	0
kumwang24_박옥순	16	2007-10-22	07:08:00	113	79	4	428	6188	-7.43737	1.8498	1	-7	6	0	0
kumwang24_박옥순	17	2007-10-23	08:01:00	114	72	5	481	7681	-2.93266	-3.38858	1493	1	-7	0	0
kumwang24_박옥순	18	2007-10-23	08:01:00	109	77	5	481	7681	-7.93266	1.61142	0	-5	5	0	0
Result	nx	reading.date	reading.time	sbp	dbp	day	minutes	time	res.sbp	res.dbp	dtime	dsbp	ddbp	sbp.bi	dbp.bi
kumwang25_박음전	1	2007-11-19	14:55:00	124	67	0	895	895	11.674	4.04704	NA	NA	NA	0	0
kumwang25_박음전	2	2007-11-20	08:05:00	122	62	1	485	1925	7.35321	-2.14432	1030	-2	-5	0	0
kumwang25_박음전	3	2007-11-20	08:06:00	121	65	1	486	1926	6.35096	0.854527	1	-1	3	0	0
kumwang25_박음전	4	2007-11-20	17:02:00	112	63	1	1022	2462	-3.85676	-1.76544	536	-9	-2	0	0
kumwang25_박음전	5	2007-11-20	17:03:00	109	64	1	1023	2463	-6.85902	-0.766599	1	-3	1	0	0
kumwang25_박음전	6	2007-11-21	07:39:00	100	59	2	459	3339	-17.8328	-6.77983	876	-9	-5	0	0
kumwang25_박음전	7	2007-11-21	07:40:00	97	56	2	460	3340	-20.8351	-9.78099	1	-3	-3	0	0
kumwang25_박음전	8	2007-11-21	17:22:00	123	68	2	1042	3922	3.85355	1.54584	582	26	12	0	0
kumwang25_박음전	9	2007-11-21	17:23:00	120	64	2	1043	3923	0.851293	-2.45532	1	-3	-4	0	0
kumwang25_박음전	10	2007-11-22	16:04:00	116	88	3	964	5284	-6.21533	19.9705	1361	-4	24	0	1
kumwang25_박음전	11	2007-11-22	16:05:00	131	66	3	965	5285	8.78242	-2.03069	1	15	-22	0	0
kumwang25_박음전	12	2007-11-23	11:21:00	137	74	4	681	6441	12.1777	4.63221	1156	6	8	1	0
kumwang25_박음전	13	2007-11-23	11:22:00	126	69	4	682	6442	1.17545	-0.368945	1	-11	-5	0	0
kumwang25_박음전	14	2007-11-23	17:43:00	124	73	4	1063	6823	-1.68302	3.19037	381	-2	4	0	0
kumwang25_박음전	15	2007-11-23	17:44:00	139	75	4	1064	6824	13.3147	5.18921	1	15	2	1	0
kumwang25_박음전	16	2007-11-25	00:05:00	137	70	6	5	8645	7.21163	-1.91707	1821	-2	-5	1	0
kumwang25_박음전	17	2007-11-25	08:57:00	123	64	6	537	9177	-7.98708	-8.53241	532	-14	-6	0	0
kumwang25_박음전	18	2007-11-25	08:58:00	122	59	6	538	9178	-8.98934	-13.5336	1	-1	-5	0	0
kumwang25_박음전	19	2007-11-25	18:14:00	134	81	6	1094	9734	1.75788	7.82333	556	12	22	0	0
kumwang25_박음전	20	2007-11-25	18:15:00	132	76	6	1095	9735	-0.244374	2.82218	1	-2	-5	0	0
Result	nx	reading.date	reading.time	sbp	dbp	day	minutes	time	res.sbp	res.dbp	dtime	dsbp	ddbp	sbp.bi	dbp.bi
kumwang26_박정자	1	2007-11-08	14:50:00	127	75	0	890	890	0.594258	1.94946	NA	NA	NA	0	0
kumwang26_박정자	2	2007-11-08	21:02:00	137	71	0	1262	1262	10.4609	-1.81746	372	10	-4	1	0
kumwang26_박정자	3	2007-11-08	21:04:00	124	73	0	1264	1264	-2.53981	0.183788	2	-13	2	0	0
kumwang26_박정자	4	2007-11-09	06:09:00	128	72	1	369	1809	1.26482	-0.47474	545	4	-1	0	0
kumwang26_박정자	5	2007-11-09	06:11:00	128	74	1	371	1811	1.2641	1.52651	2	0	2	0	0
kumwang26_박정자	6	2007-11-09	21:13:00	116	67	1	1273	2713	-11.0592	-4.90834	902	-12	-7	0	0
kumwang26_박정자	7	2007-11-09	21:15:00	111	63	1	1275	2715	-16.06	-8.90708	2	-5	-4	0	0
kumwang26_박정자	8	2007-11-10	06:20:00	137	82	2	380	3260	9.74466	10.4344	545	26	19	1	0
kumwang26_박정자	9	2007-11-10	06:22:00	134	68	2	382	3262	6.74395	-3.56436	2	-3	-14	0	0
kumwang26_박정자	10	2007-11-10	21:48:00	130	75	2	1308	4188	2.412	4.01583	926	-4	7	0	0
kumwang26_박정자	11	2007-11-10	21:50:00	120	67	2	1310	4190	-7.58872	-3.98292	2	-10	-8	0	0
kumwang26_박정자	12	2007-11-11	07:07:00	132	77	3	427	4747	4.21161	6.36607	557	12	10	0	0
kumwang26_박정자	13	2007-11-11	07:09:00	124	76	3	429	4749	-3.78911	5.36732	2	-8	-1	0	0
kumwang26_박정자	14	2007-11-12	07:17:00	132	69	4	437	6197	3.69181	-0.725427	1448	8	-7	0	0
kumwang26_박정자	15	2007-11-12	07:19:00	127	67	4	439	6199	-1.3089	-2.72417	2	-5	-2	0	0
kumwang26_박정자	16	2007-11-13	01:03:00	135	70	5	63	7263	6.30968	0.942478	1064	8	3	1	0
kumwang26_박정자	17	2007-11-13	01:05:00	136	68	5	65	7265	7.30896	-1.05627	2	1	-2	1	0
kumwang26_박정자	18	2007-11-13	07:33:00	122	70	5	453	7653	-6.83013	1.18683	388	-14	2	0	0
kumwang26_박정자	19	2007-11-13	07:35:00	124	65	5	455	7655	-4.83085	-3.81191	2	2	-5	0	0
Result	nx	reading.date	reading.time	sbp	dbp	day	minutes	time	res.sbp	res.dbp	dtime	dsbp	ddbp	sbp.bi	dbp.bi
kumwang27_박춘빈	1	2007-10-02	15:16:00	124	80	0	916	916	8.27538	0.175226	NA	NA	NA	0	0
kumwang27_박춘빈	2	2007-10-02	21:28:00	104	75	0	1288	1288	-12.7009	-5.07478	372	-20	-5	0	0
kumwang27_박춘빈	3	2007-10-03	06:43:00	132	98	1	403	1843	13.8426	17.5522	555	28	23	0	1
kumwang27_박춘빈	4	2007-10-03	12:45:00	129	87	1	765	2205	9.89254	6.30895	362	-3	-11	0	1
kumwang27_박춘빈	5	2007-10-03	17:01:00	132	81	1	1021	2461	12.2207	0.136909	256	3	-6	0	0
kumwang27_박춘빈	6	2007-10-03	21:59:00	118	83	1	1319	2759	-2.56137	1.93664	298	-14	2	0	0
kumwang27_박춘빈	7	2007-10-04	05:37:00	120	70	2	337	3217	-1.76334	-11.3712	458	2	-13	0	0
kumwang27_박춘빈	8	2007-10-04	13:44:00	131	87	2	824	3704	7.95858	5.30155	487	11	17	0	1
kumwang27_박춘빈	9	2007-10-04	17:52:00	111	71	2	1072	3952	-12.6923	-10.8651	248	-20	-16	0	0
kumwang27_박춘빈	10	2007-10-04	22:52:00	95	68	2	1372	4252	-29.4796	-14.0667	300	-16	-3	0	0
kumwang27_박춘빈	11	2007-10-05	06:03:00	124	84	3	363	4683	-1.61069	1.64361	431	29	16	0	0
kumwang27_박춘빈	12	2007-10-05	10:00:00	123	88	3	600	4920	-3.23267	5.48434	237	-1	4	0	1
kumwang27_박춘빈	13	2007-10-05	18:10:00	124	75	3	1090	5410	-3.51863	-7.84497	490	1	-13	0	0
kumwang27_박춘빈	14	2007-10-05	21:13:00	104	75	3	1273	5593	-23.9989	-7.96795	183	-20	0	0	0
kumwang27_박춘빈	15	2007-10-06	05:59:00	144	92	4	359	6119	14.6207	8.67855	526	40	17	1	1
kumwang27_박춘빈	16	2007-10-06	11:43:00	130	84	4	703	6463	-0.282106	0.447365	344	-14	-8	0	0
kumwang27_박춘빈	17	2007-10-06	15:46:00	145	92	4	946	6706	14.0802	8.28406	243	15	8	1	1
kumwang27_박춘빈	18	2007-10-06	22:00:00	130	76	4	1320	7080	-1.90135	-7.96729	374	-15	-16	0	0
kumwang27_박춘빈	19	2007-10-07	06:20:00	143	88	5	380	7580	9.78645	3.69669	500	13	12	1	1
kumwang27_박춘빈	20	2007-10-07	10:55:00	137	90	5	655	7855	3.06475	5.51187	275	-6	2	1	1
Result	nx	reading.date	reading.time	sbp	dbp	day	minutes	time	res.sbp	res.dbp	dtime	dsbp	ddbp	sbp.bi	dbp.bi
kumwang28_박화선	1	2007-11-10	14:50:00	127	84	0	890	890	14.9728	6.17163	NA	NA	NA	0	0
kumwang28_박화선	2	2007-11-10	20:29:00	89	65	0	1229	1229	-23.1351	-12.9457	339	-38	-19	0	0
kumwang28_박화선	3	2007-11-10	20:31:00	89	67	0	1231	1231	-23.1358	-10.9464	2	0	2	0	0
kumwang28_박화선	4	2007-11-11	08:32:00	117	86	1	512	1952	4.63454	7.80399	721	28	19	0	1
kumwang28_박화선	5	2007-11-11	08:33:00	119	81	1	513	1953	6.63423	2.80364	1	2	-5	0	0
kumwang28_박화선	6	2007-11-11	21:37:00	132	90	1	1297	2737	19.3845	11.5322	784	13	9	0	1
kumwang28_박화선	7	2007-11-12	06:20:00	127	89	2	380	3260	14.2179	10.3512	523	-5	-1	0	1
kumwang28_박화선	8	2007-11-12	06:22:00	128	92	2	382	3262	15.2173	13.3505	2	1	3	0	1
kumwang28_박화선	9	2007-11-12	22:33:00	98	64	2	1353	4233	-15.0921	-14.9856	971	-30	-28	0	0
kumwang28_박화선	10	2007-11-12	22:35:00	96	57	2	1355	4235	-17.0927	-21.9863	2	-2	-7	0	0
kumwang28_박화선	11	2007-11-13	08:44:00	124	80	3	524	4844	10.7133	0.802843	609	28	23	0	0
kumwang28_박화선	12	2007-11-13	08:45:00	118	83	3	525	4845	4.713	3.8025	1	-6	3	0	0
kumwang28_박화선	13	2007-11-13	20:30:00	108	79	3	1230	5550	-5.51157	-0.441558	705	-10	-4	0	0
kumwang28_박화선	14	2007-11-13	20:32:00	108	79	3	1232	5552	-5.51221	-0.44225	2	0	0	0	0
kumwang28_박화선	15	2007-11-14	07:33:00	114	84	4	453	6213	0.277233	4.32893	661	6	5	0	0
kumwang28_박화선	16	2007-11-14	21:10:00	108	80	4	1270	7030	-5.98302	0.0461002	817	-6	-4	0	0
kumwang28_박화선	17	2007-11-14	21:12:00	114	79	4	1272	7032	0.0163462	-0.954592	2	6	-1	0	0
kumwang28_박화선	18	2007-11-15	06:23:00	119	82	5	383	7583	4.84083	1.85466	551	5	3	0	0
kumwang28_박화선	19	2007-11-15	06:24:00	114	80	5	384	7584	-0.15949	-0.145682	1	-5	-2	0	0
Result	nx	reading.date	reading.time	sbp	dbp	day	minutes	time	res.sbp	res.dbp	dtime	dsbp	ddbp	sbp.bi	dbp.bi
kumwang29_서강즉	1	2007-10-11	21:23:00	172	76	0	1283	1283	33.2846	-2.19698	NA	NA	NA	1	0
kumwang29_서강즉	2	2007-10-11	21:25:00	137	76	0	1285	1285	-1.71578	-2.19986	2	-35	0	1	0
kumwang29_서강즉	3	2007-10-12	06:38:00	140	84	1	398	1838	1.17968	5.00342	553	3	8	1	0
kumwang29_서강즉	4	2007-10-12	06:40:00	140	82	1	400	1840	1.1793	3.00054	2	0	-2	1	0
kumwang29_서강즉	5	2007-10-12	20:34:00	119	76	1	1234	2674	-19.9784	-4.20102	834	-21	-6	0	0
kumwang29_서강즉	6	2007-10-12	20:37:00	116	74	1	1237	2677	-22.9789	-6.20535	3	-3	-2	0	0
kumwang29_서강즉	7	2007-10-13	06:35:00	120	79	2	395	3275	-19.092	-2.0669	598	4	5	0	0
kumwang29_서강즉	8	2007-10-13	06:37:00	130	79	2	397	3277	-9.09235	-2.06978	2	10	0	0	0
kumwang29_서강즉	9	2007-10-13	06:42:00	132	77	2	402	3282	-7.0933	-4.07699	5	2	-2	0	0
kumwang29_서강즉	10	2007-10-14	06:54:00	153	92	3	414	4734	13.6322	8.83108	1452	21	15	1	1
kumwang29_서강즉	11	2007-10-14	06:56:00	156	91	3	416	4736	16.6318	7.8282	2	3	-1	1	1
kumwang29_서강즉	12	2007-10-15	06:49:00	166	90	4	409	6169	26.3609	4.76364	1433	10	-1	1	1
kumwang29_서강즉	13	2007-10-17	18:40:00	128	84	6	1120	9760	-12.3179	-6.41	3591	-38	-6	0	0
Result	nx	reading.date	reading.time	sbp	dbp	day	minutes	time	res.sbp	res.dbp	dtime	dsbp	ddbp	sbp.bi	dbp.bi
kumwang30_송인경	1	2007-11-29	17:05:00	129	85	0	1025	1025	13.1708	1.6654	NA	NA	NA	0	1
kumwang30_송인경	2	2007-11-29	17:07:00	113	89	0	1027	1027	-2.82557	5.66838	2	-16	4	0	1
kumwang30_송인경	3	2007-11-29	21:05:00	120	77	0	1265	1265	4.60819	-5.97774	238	7	-12	0	0
kumwang30_송인경	4	2007-11-30	06:06:00	109	89	1	366	1806	-5.40582	6.82667	541	-11	12	0	1
kumwang30_송인경	5	2007-11-30	20:23:00	113	92	1	1223	2663	0.15609	11.1009	857	4	3	0	1
kumwang30_송인경	6	2007-11-30	20:25:00	104	71	1	1225	2665	-8.84026	-9.89608	2	-9	-21	0	0
kumwang30_송인경	7	2007-12-01	10:13:00	95	69	2	613	3493	-16.3312	-10.6649	828	-9	-2	0	0
kumwang30_송인경	8	2007-12-01	20:51:00	122	73	2	1251	4131	11.8316	-5.71629	638	27	4	0	0
kumwang30_송인경	9	2007-12-02	10:25:00	100	76	3	625	4945	-8.68489	-1.50596	814	-22	3	0	0
kumwang30_송인경	10	2007-12-02	20:17:00	120	80	3	1217	5537	12.3941	3.37429	592	20	4	0	0
kumwang30_송인경	11	2007-12-03	10:42:00	107	78	4	642	6402	0.970542	2.66045	865	-13	-2	0	0
kumwang30_송인경	12	2007-12-03	19:43:00	104	77	4	1183	6943	-1.04347	2.46487	541	-3	-1	0	0
Result	nx	reading.date	reading.time	sbp	dbp	day	minutes	time	res.sbp	res.dbp	dtime	dsbp	ddbp	sbp.bi	dbp.bi
kumwang31_신현규	1	2007-10-11	19:26:00	124	80	0	1166	1166	-2.02416	0.215913	NA	NA	NA	0	0
kumwang31_신현규	2	2007-10-11	19:36:00	123	78	0	1176	1176	-3.00051	-1.77263	10	-1	-2	0	0
kumwang31_신현규	3	2007-10-12	06:29:00	124	80	1	389	1829	-0.455856	0.975242	653	1	2	0	0
kumwang31_신현규	4	2007-10-12	08:58:00	115	72	1	538	1978	-9.1034	-6.85411	149	-9	-8	0	0
kumwang31_신현규	5	2007-10-12	22:12:00	126	81	1	1332	2772	3.77478	3.05525	794	11	9	0	0
kumwang31_신현규	6	2007-10-12	22:17:00	122	81	1	1337	2777	-0.213389	3.06098	5	-4	0	0	0
kumwang31_신현규	7	2007-10-13	06:24:00	129	80	2	384	3264	7.9386	2.61874	487	7	-1	0	0
kumwang31_신현규	8	2007-10-13	06:28:00	124	75	2	388	3268	2.94806	-2.37668	4	-5	-5	0	0
kumwang31_신현규	9	2007-10-13	22:37:00	122	78	2	1357	4237	3.2402	1.73311	969	-2	3	0	0
kumwang31_신현규	10	2007-10-13	22:44:00	119	72	2	1364	4244	0.256756	-4.25888	7	-3	-6	0	0
kumwang31_신현규	11	2007-10-14	06:24:00	112	76	3	384	4704	-5.65513	0.26796	460	-7	4	0	0
kumwang31_신현규	12	2007-10-14	06:27:00	120	81	3	387	4707	2.35197	5.2714	3	8	5	0	0
kumwang31_신현규	13	2007-10-14	22:14:00	114	72	3	1334	5654	-1.40793	-2.64401	947	-6	-9	0	0
kumwang31_신현규	14	2007-10-14	22:19:00	111	69	3	1339	5659	-4.3961	-5.63829	5	-3	-3	0	0
kumwang31_신현규	15	2007-10-15	06:36:00	120	77	4	396	6156	5.77954	2.93093	497	9	8	0	0
kumwang31_신현규	16	2007-10-15	06:40:00	121	77	4	400	6160	6.789	2.93551	4	1	0	0	0
kumwang31_신현규	17	2007-10-15	22:06:00	108	75	4	1326	7086	-4.02058	1.99605	926	-13	-2	0	0
kumwang31_신현규	18	2007-10-15	22:09:00	124	78	4	1329	7089	11.9865	4.99948	3	16	3	0	0
kumwang31_신현규	19	2007-10-16	07:03:00	108	75	5	423	7623	-2.75032	2.61107	534	-16	-3	0	0
kumwang31_신현규	20	2007-10-16	07:06:00	108	73	5	426	7626	-2.74322	0.614506	3	0	-2	0	0
kumwang31_신현규	21	2007-10-16	21:50:00	108	69	5	1310	8510	-0.652145	-2.37305	884	0	-4	0	0
kumwang31_신현규	22	2007-10-16	21:54:00	100	64	5	1314	8514	-8.64268	-7.36847	4	-8	-5	0	0
Result	nx	reading.date	reading.time	sbp	dbp	day	minutes	time	res.sbp	res.dbp	dtime	dsbp	ddbp	sbp.bi	dbp.bi
kumwang32_안봉례	1	2007-11-02	21:12:00	143	85	0	1272	1272	21.2402	7.4193	NA	NA	NA	1	1
kumwang32_안봉례	2	2007-11-02	21:14:00	138	89	0	1274	1274	16.2417	11.4212	2	-5	4	1	1
kumwang32_안봉례	3	2007-11-03	04:47:00	108	70	1	287	1727	-13.4183	-7.14336	453	-30	-19	0	0
kumwang32_안봉례	4	2007-11-03	04:49:00	104	67	1	289	1729	-17.4168	-10.1414	2	-4	-3	0	0
kumwang32_안봉례	5	2007-11-03	23:09:00	122	77	1	1389	2829	1.40893	0.915873	1100	18	10	0	0
kumwang32_안봉례	6	2007-11-03	23:10:00	117	76	1	1390	2830	-3.59032	-0.083166	1	-5	-1	0	0
kumwang32_안봉례	7	2007-11-04	06:36:00	115	75	2	396	3276	-5.25553	-0.654474	446	-2	-1	0	0
kumwang32_안봉례	8	2007-11-04	06:37:00	117	73	2	397	3277	-3.25478	-2.65351	1	2	-2	0	0
kumwang32_안봉례	9	2007-11-04	21:01:00	120	74	2	1261	4141	0.393765	-0.823042	864	3	1	0	0
kumwang32_안봉례	10	2007-11-04	21:02:00	122	76	2	1262	4142	2.39452	1.17792	1	2	2	0	0
kumwang32_안봉례	11	2007-11-05	06:43:00	120	79	3	403	4723	0.830633	4.73637	581	-2	3	0	0
kumwang32_안봉례	12	2007-11-05	06:45:00	118	76	3	405	4725	-1.16787	1.73829	2	-2	-3	0	0
kumwang32_안봉례	13	2007-11-05	21:25:00	119	66	3	1285	5605	0.492692	-7.41586	880	1	-10	0	0
kumwang32_안봉례	14	2007-11-05	21:26:00	124	75	3	1286	5606	5.49344	1.58511	1	5	9	0	0
kumwang32_안봉례	15	2007-11-06	05:53:00	108	68	4	353	6113	-10.126	-4.92757	507	-16	-7	0	0
kumwang32_안봉례	16	2007-11-06	05:54:00	113	69	4	354	6114	-5.12524	-3.92661	1	5	1	0	0
kumwang32_안봉례	17	2007-11-06	22:49:00	118	76	4	1369	7129	0.636657	4.049	1015	5	7	0	0
kumwang32_안봉례	18	2007-11-06	22:50:00	116	72	4	1370	7130	-1.36259	0.0499644	1	-2	-4	0	0
kumwang32_안봉례	19	2007-11-07	06:34:00	122	70	5	394	7594	4.9857	-1.50404	464	6	-2	0	0
kumwang32_안봉례	20	2007-11-07	06:35:00	118	75	5	395	7595	0.986452	3.49692	1	-4	5	0	0
kumwang32_안봉례	21	2007-11-07	23:08:00	116	72	5	1388	8588	-0.268169	1.45138	993	-2	-3	0	0
kumwang32_안봉례	22	2007-11-07	23:09:00	120	68	5	1389	8589	3.73258	-2.54765	1	4	-4	0	0
kumwang32_안봉례	23	2007-11-08	06:43:00	118	72	6	403	9043	2.07337	1.88873	454	-2	4	0	0
kumwang32_안봉례	24	2007-11-08	06:45:00	116	72	6	405	9045	0.07487	1.89065	2	-2	0	0	0
Result	nx	reading.date	reading.time	sbp	dbp	day	minutes	time	res.sbp	res.dbp	dtime	dsbp	ddbp	sbp.bi	dbp.bi
kumwang33_엄영석	1	2007-11-19	15:11:00	115	73	0	911	911	-3.93301	0.0445103	NA	NA	NA	0	0
kumwang33_엄영석	2	2007-11-19	15:13:00	116	71	0	913	913	-2.92758	-1.95149	2	1	-2	0	0
kumwang33_엄영석	3	2007-11-20	07:58:00	108	64	1	478	1918	-8.1998	-6.94248	1005	-8	-7	0	0
kumwang33_엄영석	4	2007-11-20	07:59:00	114	72	1	479	1919	-2.19708	1.05952	1	6	8	0	0
kumwang33_엄영석	5	2007-11-20	16:58:00	129	81	1	1018	2458	14.2659	11.137	539	15	9	0	0
kumwang33_엄영석	6	2007-11-20	17:00:00	122	76	1	1020	2460	7.27131	6.14098	2	-7	-5	0	0
kumwang33_엄영석	7	2007-11-21	07:20:00	116	65	2	440	3320	3.60554	-3.13987	860	-6	-11	0	0
kumwang33_엄영석	8	2007-11-21	07:22:00	111	69	2	442	3322	-1.38903	0.864132	2	-5	4	0	0
kumwang33_엄영석	9	2007-11-21	16:54:00	120	76	2	1014	3894	9.1635	9.00757	572	9	7	0	0
kumwang33_엄영석	10	2007-11-21	16:56:00	116	71	2	1016	3896	5.16893	4.01157	2	-4	-5	0	0
kumwang33_엄영석	11	2007-11-22	09:32:00	97	56	3	572	4892	-11.1277	-8.99742	996	-19	-15	0	0
kumwang33_엄영석	12	2007-11-22	09:34:00	92	52	3	574	4894	-16.1223	-12.9934	2	-5	-4	0	0
kumwang33_엄영석	13	2007-11-22	09:35:00	96	59	3	575	4895	-12.1196	-5.99142	1	4	7	0	0
kumwang33_엄영석	14	2007-11-22	16:07:00	122	65	3	967	5287	14.9444	0.792194	392	26	6	0	0
kumwang33_엄영석	15	2007-11-22	16:08:00	113	58	3	968	5288	5.94712	-6.20581	1	-9	-7	0	0
kumwang33_엄영석	16	2007-11-23	07:23:00	108	62	4	443	6203	3.43062	-0.37671	915	-5	4	0	0
kumwang33_엄영석	17	2007-11-23	07:24:00	96	64	4	444	6204	-8.56666	1.62529	1	-12	2	0	0
kumwang33_엄영석	18	2007-11-23	07:25:00	94	68	4	445	6205	-10.5639	5.62729	1	-2	4	0	0
kumwang33_엄영석	19	2007-11-23	16:39:00	117	59	4	999	6759	13.9397	-2.26526	554	23	-9	0	0
kumwang33_엄영석	20	2007-11-24	07:49:00	100	68	5	469	7669	-0.590334	8.55384	910	-17	9	0	0
Result	nx	reading.date	reading.time	sbp	dbp	day	minutes	time	res.sbp	res.dbp	dtime	dsbp	ddbp	sbp.bi	dbp.bi
kumwang34_여인옥	1	2007-11-27	18:27:00	111	76	0	1107	1107	-5.46272	-2.14186	NA	NA	NA	0	0
kumwang34_여인옥	2	2007-11-27	18:29:00	118	77	0	1109	1109	1.53877	-1.1406	2	7	1	0	0
kumwang34_여인옥	3	2007-11-28	07:14:00	113	77	1	434	1874	-2.89289	-0.659633	765	-5	0	0	0
kumwang34_여인옥	4	2007-11-28	21:06:00	111	75	1	1266	2706	-4.27476	-2.13654	832	-2	-2	0	0
kumwang34_여인옥	5	2007-11-29	06:20:00	125	84	2	380	3260	10.1368	7.21177	554	14	9	0	0
kumwang34_여인옥	6	2007-11-29	06:22:00	125	82	2	382	3262	10.1383	5.21303	2	0	-2	0	0
kumwang34_여인옥	7	2007-11-29	19:27:00	118	76	2	1167	4047	3.72152	-0.293428	785	-7	-6	0	0
kumwang34_여인옥	8	2007-11-29	19:29:00	112	76	2	1169	4049	-2.277	-0.292171	2	-6	0	0	0
kumwang34_여인옥	9	2007-11-30	06:58:00	123	83	3	418	4738	9.23488	7.14102	689	11	7	0	0
kumwang34_여인옥	10	2007-11-30	07:01:00	110	76	3	421	4741	-3.76289	0.142902	3	-13	-7	0	0
kumwang34_여인옥	11	2007-11-30	20:06:00	105	69	3	1206	5526	-8.17968	-6.36355	785	-5	-7	0	0
kumwang34_여인옥	12	2007-11-30	20:08:00	104	67	3	1208	5528	-9.1782	-8.3623	2	-1	-2	0	0
kumwang34_여인옥	13	2007-12-01	06:27:00	109	74	4	387	6147	-3.71832	-0.973119	619	5	7	0	0
kumwang34_여인옥	14	2007-12-01	06:29:00	112	74	4	389	6149	-0.716833	-0.971862	2	3	0	0	0
kumwang34_여인옥	15	2007-12-02	08:15:00	116	80	5	495	7695	4.43175	6.00014	1546	4	6	0	0
kumwang34_여인옥	16	2007-12-02	08:18:00	111	74	5	498	7698	-0.566025	0.00202279	3	-5	-6	0	0
kumwang34_여인옥	17	2007-12-02	18:36:00	112	69	5	1116	8316	0.89311	-4.60943	618	1	-5	0	0
kumwang34_여인옥	18	2007-12-02	18:38:00	110	70	5	1118	8318	-1.1054	-3.60817	2	-2	1	0	0
kumwang34_여인옥	19	2007-12-03	08:39:00	112	79	6	519	9159	1.51941	5.92058	841	2	9	0	0
kumwang34_여인옥	20	2007-12-03	08:40:00	111	73	6	520	9160	0.520148	-0.0787909	1	-1	-6	0	0
Result	nx	reading.date	reading.time	sbp	dbp	day	minutes	time	res.sbp	res.dbp	dtime	dsbp	ddbp	sbp.bi	dbp.bi
kumwang35_연순덕	1	2007-10-04	14:27:00	131	97	0	867	867	7.12364	9.61659	NA	NA	NA	0	1
kumwang35_연순덕	2	2007-10-04	21:29:00	122	87	0	1289	1289	-1.69877	-0.078669	422	-9	-10	0	1
kumwang35_연순덕	3	2007-10-05	06:15:00	124	84	1	375	1815	0.522581	-2.69883	526	2	-3	0	0
kumwang35_연순덕	4	2007-10-05	09:06:00	128	89	1	546	1986	4.59454	2.42465	171	4	5	0	1
kumwang35_연순덕	5	2007-10-05	14:02:00	122	83	1	842	2282	-1.28089	-3.3616	296	-6	-6	0	0
kumwang35_연순덕	6	2007-10-05	21:13:00	115	82	1	1273	2713	-8.09952	-4.05036	431	-7	-1	0	0
kumwang35_연순덕	7	2007-10-06	06:19:00	118	84	2	379	3259	-4.86975	-1.65608	546	3	2	0	0
kumwang35_연순덕	8	2007-10-06	08:36:00	121	83	2	516	3396	-1.81209	-2.55714	137	3	-1	0	0
kumwang35_연순덕	9	2007-10-06	14:44:00	118	83	2	884	3764	-4.65723	-2.2914	368	-3	0	0	0
kumwang35_연순덕	10	2007-10-06	22:13:00	126	85	2	1333	4213	3.53172	0.0328346	449	8	2	0	1
kumwang35_연순덕	11	2007-10-07	06:25:00	126	84	3	385	4705	3.73877	-0.611878	492	0	-1	0	0
kumwang35_연순덕	12	2007-10-07	11:01:00	121	84	3	661	4981	-1.14508	-0.412571	276	-5	0	0	0
kumwang35_연순덕	13	2007-10-07	15:21:00	128	83	3	921	5241	5.96433	-1.22482	260	7	-1	0	0
kumwang35_연순덕	14	2007-10-07	21:01:00	120	88	3	1261	5581	-1.89259	4.02071	340	-8	5	0	1
kumwang35_연순덕	15	2007-10-08	06:11:00	118	83	4	371	6131	-3.66113	-0.582123	550	-2	-5	0	0
kumwang35_연순덕	16	2007-10-08	08:34:00	124	84	4	514	6274	2.39904	0.521141	143	6	1	0	0
kumwang35_연순덕	17	2007-10-08	13:00:00	120	84	4	780	6540	-1.48902	0.713228	266	-4	0	0	0
kumwang35_연순덕	18	2007-10-08	21:10:00	122	82	4	1270	7030	0.717187	-0.932929	490	2	-2	0	0
kumwang35_연순덕	19	2007-10-09	06:23:00	124	84	5	383	7583	2.9499	1.46641	553	2	2	0	0
kumwang35_연순덕	20	2007-10-09	10:55:00	120	84	5	655	7855	-0.935631	1.66283	272	-4	0	0	0
Result	nx	reading.date	reading.time	sbp	dbp	day	minutes	time	res.sbp	res.dbp	dtime	dsbp	ddbp	sbp.bi	dbp.bi
kumwang36_유한준	1	2007-11-08	21:01:00	115	81	0	1261	1261	-10.8702	-10.9981	NA	NA	NA	0	0
kumwang36_유한준	2	2007-11-09	06:37:00	128	85	1	397	1837	1.23651	-7.03128	576	13	4	0	1
kumwang36_유한준	3	2007-11-09	22:29:00	120	80	1	1349	2789	-8.23982	-12.0861	952	-8	-5	0	0
kumwang36_유한준	4	2007-11-09	22:31:00	166	137	1	1351	2791	37.7571	44.9138	2	46	57	1	1
kumwang36_유한준	5	2007-11-10	06:49:00	120	87	2	409	3289	-9.0152	-5.11488	498	-46	-50	0	1
kumwang36_유한준	6	2007-11-10	23:18:00	124	93	2	1398	4278	-6.54891	0.828179	989	4	6	0	1
kumwang36_유한준	7	2007-11-11	07:20:00	135	86	3	440	4760	3.70362	-6.19957	482	11	-7	1	1
kumwang36_유한준	8	2007-11-11	22:14:00	119	88	3	1334	5654	-13.6828	-4.25105	894	-16	2	0	1
kumwang36_유한준	9	2007-11-12	21:43:00	129	88	4	1303	7063	-5.8678	-4.33217	1409	10	0	0	1
kumwang36_유한준	10	2007-11-13	07:02:00	138	93	5	422	7622	2.26532	0.635645	559	9	5	1	1
kumwang36_유한준	11	2007-11-13	07:04:00	145	96	5	424	7624	9.26222	3.63553	2	7	3	1	1
Result	nx	reading.date	reading.time	sbp	dbp	day	minutes	time	res.sbp	res.dbp	dtime	dsbp	ddbp	sbp.bi	dbp.bi
kumwang37_윤경원	1	2007-11-02	16:33:00	130	81	0	993	993	3.17869	2.96122	NA	NA	NA	0	0
kumwang37_윤경원	2	2007-11-02	16:34:00	128	80	0	994	994	1.17953	1.96063	1	-2	-1	0	0
kumwang37_윤경원	3	2007-11-02	21:05:00	121	76	0	1265	1265	-5.59182	-2.19905	271	-7	-4	0	0
kumwang37_윤경원	4	2007-11-02	21:06:00	116	75	0	1266	1266	-10.591	-3.19964	1	-5	-1	0	0
kumwang37_윤경원	5	2007-11-03	06:52:00	129	82	1	412	1852	2.90345	3.45508	586	13	7	0	0
kumwang37_윤경원	6	2007-11-03	06:53:00	133	83	1	413	1853	6.90429	4.45449	1	4	1	0	0
kumwang37_윤경원	7	2007-11-03	21:02:00	118	77	1	1262	2702	-7.37938	-2.04576	849	-15	-6	0	0
kumwang37_윤경원	8	2007-11-03	21:04:00	118	76	1	1264	2704	-7.3777	-3.04694	2	0	-1	0	0
kumwang37_윤경원	9	2007-11-04	07:48:00	140	85	2	468	3348	15.1657	5.57361	644	22	9	1	1
kumwang37_윤경원	10	2007-11-04	07:50:00	142	83	2	470	3350	17.1674	3.57243	2	2	-2	1	0
kumwang37_윤경원	11	2007-11-04	20:57:00	122	73	2	1257	4137	-2.16864	-6.89128	787	-20	-10	0	0
kumwang37_윤경원	12	2007-11-04	20:59:00	124	76	2	1259	4139	-0.16695	-3.89246	2	2	3	0	0
kumwang37_윤경원	13	2007-11-05	07:09:00	125	82	3	429	4749	1.34772	1.74811	610	1	6	0	0
kumwang37_윤경원	14	2007-11-05	07:10:00	129	83	3	430	4750	5.34857	2.74752	1	4	1	0	0
kumwang37_윤경원	15	2007-11-05	21:03:00	111	73	3	1263	5583	-11.9486	-7.74329	833	-18	-10	0	0
kumwang37_윤경원	16	2007-11-05	21:05:00	108	72	3	1265	5585	-14.9469	-8.74447	2	-3	-1	0	0
kumwang37_윤경원	17	2007-11-06	07:04:00	118	82	4	424	6184	-4.44153	0.902586	599	10	10	0	0
kumwang37_윤경원	18	2007-11-06	07:06:00	123	80	4	426	6186	0.560158	-1.09859	2	5	-2	0	0
kumwang37_윤경원	19	2007-11-06	21:04:00	124	83	4	1264	7024	2.2672	1.40764	838	1	3	0	0
kumwang37_윤경원	20	2007-11-07	07:29:00	128	88	5	449	7649	6.79453	6.03938	625	4	5	0	1
kumwang37_윤경원	21	2007-11-07	07:30:00	123	86	5	450	7650	1.79537	4.03879	1	-5	-2	0	1
Result	nx	reading.date	reading.time	sbp	dbp	day	minutes	time	res.sbp	res.dbp	dtime	dsbp	ddbp	sbp.bi	dbp.bi
kumwang38_이봉남	1	2007-09-12	21:09:00	123	82	0	1269	1269	10.6406	13.4425	NA	NA	NA	0	0
kumwang38_이봉남	2	2007-09-12	21:16:00	118	70	0	1276	1276	5.64155	1.443	7	-5	-12	0	0
kumwang38_이봉남	3	2007-09-13	18:03:00	97	58	1	1083	2523	-15.1977	-10.4735	1247	-21	-12	0	0
kumwang38_이봉남	4	2007-09-13	18:04:00	104	66	1	1084	2524	-8.19759	-2.47341	1	7	8	0	0
kumwang38_이봉남	5	2007-09-14	08:13:00	124	78	2	493	3373	11.9118	9.58346	849	20	12	0	0
kumwang38_이봉남	6	2007-09-14	08:15:00	112	72	2	495	3375	-0.0879058	3.58359	2	-12	-6	0	0
kumwang38_이봉남	7	2007-09-14	08:17:00	113	72	2	497	3377	0.912352	3.58372	2	1	0	0	0
kumwang38_이봉남	8	2007-09-14	22:00:00	112	69	2	1320	4200	0.0184296	0.638848	823	-1	-3	0	0
kumwang38_이봉남	9	2007-09-14	22:01:00	106	66	2	1321	4201	-5.98144	-2.36108	1	-6	-3	0	0
kumwang38_이봉남	10	2007-09-14	22:02:00	115	60	2	1322	4202	3.01869	-8.36102	1	9	-6	0	0
kumwang38_이봉남	11	2007-09-14	22:06:00	120	76	2	1326	4206	8.0192	7.63925	4	5	16	0	0
kumwang38_이봉남	12	2007-09-15	08:13:00	118	72	3	493	4813	6.09744	3.67991	607	-2	-4	0	0
kumwang38_이봉남	13	2007-09-15	08:17:00	113	70	3	497	4817	1.09796	1.68018	4	-5	-2	0	0
kumwang38_이봉남	14	2007-09-15	08:19:00	92	59	3	499	4819	-19.9018	-9.31969	2	-21	-11	0	0
kumwang38_이봉남	15	2007-09-15	08:22:00	103	65	3	502	4822	-8.9014	-3.31949	3	11	6	0	0
kumwang38_이봉남	16	2007-09-15	21:09:00	136	68	3	1269	5589	24.1975	-0.268116	767	33	3	1	0
kumwang38_이봉남	17	2007-09-15	21:12:00	110	68	3	1272	5592	-1.80215	-0.267915	3	-26	0	0	0
kumwang38_이봉남	18	2007-09-15	22:45:00	101	56	3	1365	5685	-10.7902	-12.2617	93	-9	-12	0	0
kumwang38_이봉남	19	2007-09-15	22:47:00	125	73	3	1367	5687	13.2101	4.73845	2	24	17	0	0
kumwang38_이봉남	20	2007-09-15	22:51:00	116	71	3	1371	5691	4.21061	2.73872	4	-9	-2	0	0
kumwang38_이봉남	21	2007-09-16	17:04:00	120	69	4	1024	6784	8.35148	0.811925	1093	4	-2	0	0
kumwang38_이봉남	22	2007-09-16	17:06:00	108	60	4	1026	6786	-3.64826	-8.18794	2	-12	-9	0	0
kumwang38_이봉남	23	2007-09-16	17:09:00	112	70	4	1029	6789	0.352129	1.81226	3	4	10	0	0
kumwang38_이봉남	24	2007-09-16	21:26:00	111	66	4	1286	7046	-0.614746	-2.17053	257	-1	-4	0	0
kumwang38_이봉남	25	2007-09-16	21:28:00	94	61	4	1288	7048	-17.6145	-7.17039	2	-17	-5	0	0
kumwang38_이봉남	26	2007-09-16	22:18:00	111	69	4	1338	7098	-0.608043	0.832957	50	17	8	0	0
kumwang38_이봉남	27	2007-09-17	22:06:00	116	69	5	1326	8526	4.57601	0.928605	1428	5	0	0	0
kumwang38_이봉남	28	2007-09-17	22:08:00	99	59	5	1328	8528	-12.4237	-9.07126	2	-17	-10	0	0
kumwang38_이봉남	29	2007-09-17	22:19:00	116	76	5	1339	8539	4.57769	7.92948	11	17	17	0	0
kumwang38_이봉남	30	2007-09-17	22:21:00	96	64	5	1341	8541	-15.4221	-4.07039	2	-20	-12	0	0
kumwang38_이봉남	31	2007-09-21	12:58:00	115	72	9	778	13738	4.24779	4.27771	5197	19	8	0	0
kumwang38_이봉남	32	2007-09-21	14:47:00	95	66	9	887	13847	-15.7382	-1.71499	109	-20	-6	0	0
kumwang38_이봉남	33	2007-09-22	04:48:00	115	72	10	288	14688	4.37024	4.34134	841	20	6	0	0
kumwang38_이봉남	34	2007-09-22	04:51:00	114	72	10	291	14691	3.37063	4.34154	3	-1	0	0	0
kumwang38_이봉남	35	2007-09-25	20:18:00	124	68	13	1218	19938	14.0469	0.692985	5247	10	-4	0	0
kumwang38_이봉남	36	2007-09-25	20:23:00	118	68	13	1223	19943	8.04757	0.693319	5	-6	0	0	0
kumwang38_이봉남	37	2007-09-27	14:04:00	112	75	15	844	22444	2.36992	7.86084	2501	-6	7	0	0
kumwang38_이봉남	38	2007-09-29	03:56:00	113	74	17	236	24716	3.66276	7.01302	2272	1	-1	0	0
kumwang38_이봉남	39	2007-09-29	03:58:00	104	61	17	238	24718	-5.33698	-5.98685	2	-9	-13	0	0
kumwang38_이봉남	40	2007-09-29	16:02:00	118	73	17	962	25442	8.75634	6.06164	724	14	12	0	0
kumwang38_이봉남	41	2007-09-29	16:05:00	103	65	17	965	25445	-6.24327	-1.93815	3	-15	-8	0	0
kumwang38_이봉남	42	2007-09-29	23:17:00	122	72	17	1397	25877	12.8124	5.09078	432	19	7	0	0
kumwang38_이봉남	43	2007-09-29	23:18:00	100	60	17	1398	25878	-9.18746	-6.90915	1	-22	-12	0	0
kumwang38_이봉남	44	2007-09-29	23:25:00	113	64	17	1405	25885	3.81344	-2.90868	7	13	4	0	0
kumwang38_이봉남	45	2007-10-05	05:28:00	113	68	23	328	33448	4.78824	1.59789	7563	0	4	0	0
kumwang38_이봉남	46	2007-10-05	05:31:00	96	64	23	331	33451	-12.2114	-2.40191	3	-17	-4	0	0
kumwang38_이봉남	47	2007-10-05	05:33:00	101	61	23	333	33453	-7.21111	-5.40178	2	5	-3	0	0
Result	nx	reading.date	reading.time	sbp	dbp	day	minutes	time	res.sbp	res.dbp	dtime	dsbp	ddbp	sbp.bi	dbp.bi
kumwang39_이산옥	1	2007-11-09	12:44:00	133	91	0	764	764	3.41625	6.23004	NA	NA	NA	0	1
kumwang39_이산옥	2	2007-11-09	12:46:00	127	84	0	766	766	-2.58249	-0.770722	2	-6	-7	0	0
kumwang39_이산옥	3	2007-11-09	22:33:00	124	76	0	1353	1353	-5.21425	-8.99454	587	-3	-8	0	0
kumwang39_이산옥	4	2007-11-09	22:35:00	117	71	0	1355	1355	-12.213	-13.9953	2	-7	-5	0	0
kumwang39_이산옥	5	2007-11-10	07:52:00	128	89	1	472	1912	-0.863565	3.79232	557	11	18	0	1
kumwang39_이산옥	6	2007-11-10	07:54:00	124	84	1	474	1914	-4.86231	-1.20845	2	-4	-5	0	0
kumwang39_이산옥	7	2007-11-10	22:21:00	125	82	1	1341	2781	-3.31841	-3.53903	867	1	-2	0	0
kumwang39_이산옥	8	2007-11-10	22:22:00	135	73	1	1342	2782	6.68222	-12.5394	1	10	-9	1	0
kumwang39_이산옥	9	2007-11-11	09:48:00	124	92	2	588	3468	-3.88743	6.19902	686	-11	19	0	1
kumwang39_이산옥	10	2007-11-11	09:49:00	128	92	2	589	3469	0.113199	6.19864	1	4	0	0	1
kumwang39_이산옥	11	2007-11-11	22:07:00	138	89	2	1327	4207	10.5762	2.91725	738	10	-3	1	1
kumwang39_이산옥	12	2007-11-11	22:08:00	131	80	2	1328	4208	3.5768	-6.08313	1	-7	-9	0	0
kumwang39_이산옥	13	2007-11-12	07:36:00	142	100	3	456	4776	14.9331	13.7003	568	11	20	1	1
kumwang39_이산옥	14	2007-11-12	07:39:00	135	98	3	459	4779	7.93501	11.6991	3	-7	-2	1	1
kumwang39_이산옥	15	2007-11-12	22:41:00	123	92	3	1361	5681	-3.49913	5.35522	902	-12	-6	0	1
kumwang39_이산옥	16	2007-11-12	22:42:00	120	88	3	1362	5682	-6.4985	1.35484	1	-3	-4	0	1
kumwang39_이산옥	17	2007-11-13	06:57:00	133	95	4	417	6177	6.81203	8.1661	495	13	7	0	1
kumwang39_이산옥	18	2007-11-13	06:58:00	131	84	4	418	6178	4.81266	-2.83428	1	-2	-11	0	0
kumwang39_이산옥	19	2007-11-13	22:00:00	120	86	4	1320	7080	-5.62149	-1.17821	902	-11	2	0	1
kumwang39_이산옥	20	2007-11-13	22:02:00	122	87	4	1322	7082	-3.62023	-0.178969	2	2	1	0	1
kumwang39_이산옥	21	2007-11-14	07:49:00	123	85	5	469	7669	-2.25198	-2.40279	587	1	-2	0	1
kumwang39_이산옥	22	2007-11-14	07:50:00	131	88	5	470	7670	5.74864	0.59683	1	8	3	0	1
kumwang39_이산옥	23	2007-11-15	07:24:00	128	92	6	444	9084	3.6357	4.05768	1414	-3	4	0	1
kumwang39_이산옥	24	2007-11-15	07:25:00	125	88	6	445	9085	0.636326	0.0573005	1	-3	-4	0	1
kumwang39_이산옥	25	2007-11-15	21:54:00	126	86	6	1314	9954	2.18148	-2.27404	869	1	-2	0	1
kumwang39_이산옥	26	2007-11-15	21:56:00	111	80	6	1316	9956	-12.8173	-8.27481	2	-15	-6	0	0
kumwang39_이산옥	27	2007-11-16	08:53:00	123	85	7	533	10613	-0.405102	-3.52532	657	12	5	0	1
kumwang39_이산옥	28	2007-11-16	08:54:00	120	86	7	534	10614	-3.40448	-2.5257	1	-3	1	0	1
Result	nx	reading.date	reading.time	sbp	dbp	day	minutes	time	res.sbp	res.dbp	dtime	dsbp	ddbp	sbp.bi	dbp.bi
kumwang40_이상원	1	2007-11-20	15:45:00	146	83	0	945	945	0.349581	-8.04002	NA	NA	NA	1	0
kumwang40_이상원	2	2007-11-20	15:49:00	146	86	0	949	949	0.355062	-5.03776	4	0	3	1	1
kumwang40_이상원	3	2007-11-20	21:03:00	147	88	0	1263	1263	1.78534	-2.86017	314	1	2	1	1
kumwang40_이상원	4	2007-11-20	21:09:00	155	100	0	1269	1269	9.79356	9.14322	6	8	12	1	1
kumwang40_이상원	5	2007-11-21	06:50:00	144	92	1	410	1850	-0.410294	1.47182	581	-11	-8	1	1
kumwang40_이상원	6	2007-11-21	06:52:00	144	94	1	412	1852	-0.407553	3.47295	2	0	2	1	1
kumwang40_이상원	7	2007-11-22	05:19:00	150	99	2	319	3199	7.43825	9.23478	1347	6	5	1	1
kumwang40_이상원	8	2007-11-22	05:21:00	146	98	2	321	3201	3.44099	8.23591	2	-4	-1	1	1
kumwang40_이상원	9	2007-11-22	18:40:00	128	83	2	1120	4000	-13.4641	-6.3122	799	-18	-15	0	0
kumwang40_이상원	10	2007-11-22	18:42:00	140	88	2	1122	4002	-1.4614	-1.31107	2	12	5	1	1
kumwang40_이상원	11	2007-11-23	07:18:00	151	96	3	438	4758	10.5746	7.1165	756	11	8	1	1
kumwang40_이상원	12	2007-11-23	07:20:00	135	83	3	440	4760	-5.42271	-5.88237	2	-16	-13	1	0
kumwang40_이상원	13	2007-11-23	21:56:00	129	81	3	1316	5636	-10.2223	-7.38693	876	-6	-2	0	0
kumwang40_이상원	14	2007-11-23	21:58:00	136	91	3	1318	5638	-3.21958	2.6142	2	7	10	1	1
kumwang40_이상원	15	2007-11-24	05:47:00	132	88	4	347	6107	-6.57691	-0.120544	469	-4	-3	0	1
kumwang40_이상원	16	2007-11-24	05:49:00	130	86	4	349	6109	-8.57417	-2.11941	2	-2	-2	0	1
kumwang40_이상원	17	2007-11-24	17:19:00	140	82	4	1039	6799	2.37134	-5.72917	690	10	-4	1	0
kumwang40_이상원	18	2007-11-24	17:21:00	132	83	4	1041	6801	-5.62591	-4.72804	2	-8	1	0	0
kumwang40_이상원	19	2007-11-26	09:02:00	148	92	6	542	9182	13.6368	5.61859	2381	16	9	1	1
kumwang40_이상원	20	2007-11-26	09:04:00	140	89	6	544	9184	5.63952	2.61972	2	-8	-3	1	1
Result	nx	reading.date	reading.time	sbp	dbp	day	minutes	time	res.sbp	res.dbp	dtime	dsbp	ddbp	sbp.bi	dbp.bi
kumwang41_이서휘	1	2007-10-06	14:25:00	145	90	0	865	865	-12.3168	-7.14397	NA	NA	NA	1	1
kumwang41_이서휘	2	2007-10-06	21:37:00	160	100	0	1297	1297	2.98427	2.94105	432	15	10	1	1
kumwang41_이서휘	3	2007-10-06	21:39:00	153	99	0	1299	1299	-4.01434	1.94145	2	-7	-1	1	1
kumwang41_이서휘	4	2007-10-07	06:23:00	166	102	1	383	1823	9.35083	5.04458	524	13	3	1	1
kumwang41_이서휘	5	2007-10-07	07:37:00	152	94	1	457	1897	-4.5976	-2.94085	74	-14	-8	1	1
kumwang41_이서휘	6	2007-10-07	14:31:00	160	96	1	871	2311	3.6909	-0.85937	414	8	2	1	1
kumwang41_이서휘	7	2007-10-07	21:04:00	160	93	1	1264	2704	3.96477	-3.78202	393	0	-3	1	1
kumwang41_이서휘	8	2007-10-08	07:51:00	164	97	2	471	3351	8.41565	0.345322	647	4	4	1	1
kumwang41_이서휘	9	2007-10-08	08:16:00	152	97	2	496	3376	-3.56693	0.350243	25	-12	0	1	1
kumwang41_이서휘	10	2007-10-08	17:34:00	161	102	2	1054	3934	5.82193	5.46007	558	9	5	1	1
kumwang41_이서휘	11	2007-10-08	22:35:00	166	100	2	1355	4235	11.0317	3.51931	301	5	-2	1	1
kumwang41_이서휘	12	2007-10-09	06:14:00	149	100	3	374	4694	-5.64844	3.60965	459	-17	0	1	1
kumwang41_이서휘	13	2007-10-09	06:54:00	152	96	3	414	4734	-2.62057	-0.382476	40	3	-4	1	1
kumwang41_이서휘	14	2007-10-09	16:39:00	152	99	3	999	5319	-2.2129	2.73266	585	0	3	1	1
kumwang41_이서휘	15	2007-10-09	22:34:00	148	93	3	1354	5674	-5.96551	-3.19747	355	-4	-6	1	1
kumwang41_이서휘	16	2007-10-10	07:26:00	145	88	4	446	6206	-8.59477	-8.09276	532	-3	-5	1	1
kumwang41_이서휘	17	2007-10-10	07:37:00	151	96	4	457	6217	-2.5871	-0.0905928	11	6	8	1	1
kumwang41_이서휘	18	2007-10-10	20:59:00	157	99	4	1259	7019	3.97179	3.06726	802	6	3	1	1
kumwang41_이서휘	19	2007-10-10	22:24:00	149	84	4	1344	7104	-3.96897	-11.916	85	-8	-15	1	0
kumwang41_이서휘	20	2007-10-11	07:29:00	152	101	5	449	7649	-0.589177	5.19125	545	3	17	1	1
kumwang41_이서휘	21	2007-10-11	08:27:00	160	100	5	507	7707	7.45124	4.20267	58	8	-1	1	1
Result	nx	reading.date	reading.time	sbp	dbp	day	minutes	time	res.sbp	res.dbp	dtime	dsbp	ddbp	sbp.bi	dbp.bi
kumwang42_이성자2	1	2007-10-12	09:17:00	128	74	0	557	557	-15.5822	-13.6187	NA	NA	NA	0	0
kumwang42_이성자2	2	2007-10-13	00:10:00	140	89	1	10	1450	-0.895106	1.984	893	12	15	1	1
kumwang42_이성자2	3	2007-10-13	00:13:00	140	88	1	13	1453	-0.886079	0.986024	3	0	-1	1	1
kumwang42_이성자2	4	2007-10-13	19:38:00	132	83	1	1178	2618	-5.38056	-3.22768	1165	-8	-5	0	0
kumwang42_이성자2	5	2007-10-14	06:16:00	152	90	2	376	3256	16.5392	4.20292	638	20	7	1	1
kumwang42_이성자2	6	2007-10-14	06:21:00	133	92	2	381	3261	-2.44575	6.20629	5	-19	2	0	1
kumwang42_이성자2	7	2007-10-14	18:42:00	144	91	2	1122	4002	10.7839	5.70642	741	11	-1	1	1
kumwang42_이성자2	8	2007-10-14	18:55:00	129	89	2	1135	4015	-4.17694	3.71519	13	-15	-2	0	1
kumwang42_이성자2	9	2007-10-15	06:08:00	149	93	3	368	4688	17.8481	8.16942	673	20	4	1	1
kumwang42_이성자2	10	2007-10-15	06:13:00	148	89	3	373	4693	16.8632	4.17279	5	-1	-4	1	1
kumwang42_이성자2	11	2007-10-15	19:20:00	130	81	3	1160	5480	1.23129	-3.29604	787	-18	-8	0	0
kumwang42_이성자2	12	2007-10-15	19:28:00	122	84	3	1168	5488	-6.74464	-0.290641	8	-8	3	0	0
kumwang42_이성자2	13	2007-10-16	05:57:00	110	76	4	357	6117	-16.852	-7.86611	629	-12	-8	0	0
kumwang42_이성자2	14	2007-10-16	06:04:00	117	83	4	364	6124	-9.8309	-0.861387	7	7	7	0	0
kumwang42_이성자2	15	2007-10-16	19:34:00	130	86	4	1174	6934	5.60642	2.68531	810	13	3	0	1
kumwang42_이성자2	16	2007-10-16	19:45:00	133	87	4	1185	6945	8.63951	3.69273	11	3	1	0	1
kumwang42_이성자2	17	2007-10-17	05:36:00	124	77	5	336	7536	1.41785	-5.90839	591	-9	-10	0	0
kumwang42_이성자2	18	2007-10-17	05:43:00	111	76	5	343	7543	-11.5611	-6.90366	7	-13	-1	0	0
kumwang42_이성자2	19	2007-10-17	19:33:00	119	79	5	1173	8373	-1.06359	-3.34347	830	8	3	0	0
kumwang42_이성자2	20	2007-10-17	19:39:00	117	80	5	1179	8379	-3.04554	-2.33942	6	-2	1	0	0
kumwang42_이성자2	21	2007-10-18	05:35:00	112	81	6	335	8975	-6.25215	-0.937167	596	-5	1	0	0
kumwang42_이성자2	22	2007-10-18	05:48:00	124	89	6	348	8988	5.78696	7.07161	13	12	8	0	1
Result	nx	reading.date	reading.time	sbp	dbp	day	minutes	time	res.sbp	res.dbp	dtime	dsbp	ddbp	sbp.bi	dbp.bi
kumwang43_이영수	1	2007-11-08	15:27:00	129	87	0	927	927	8.13695	1.95535	NA	NA	NA	0	1
kumwang43_이영수	2	2007-11-08	15:28:00	123	87	0	928	928	2.13492	1.95362	1	-6	0	0	1
kumwang43_이영수	3	2007-11-08	22:00:00	132	90	0	1320	1320	10.3378	4.27406	392	9	3	0	1
kumwang43_이영수	4	2007-11-08	22:01:00	112	84	0	1321	1321	-9.66427	-1.72767	1	-20	-6	0	0
kumwang43_이영수	5	2007-11-09	06:48:00	120	84	1	408	1848	-2.73596	-2.64126	527	8	0	0	0
kumwang43_이영수	6	2007-11-09	06:49:00	124	88	1	409	1849	1.262	1.357	1	4	4	0	1
kumwang43_이영수	7	2007-11-09	21:45:00	112	76	1	1305	2745	-12.5601	-12.1963	896	-12	-12	0	0
kumwang43_이영수	8	2007-11-09	21:47:00	106	79	1	1307	2747	-18.5641	-9.19973	2	-6	3	0	0
kumwang43_이영수	9	2007-11-10	06:51:00	132	96	2	411	3291	6.32959	6.85721	544	26	17	0	1
kumwang43_이영수	10	2007-11-10	06:52:00	130	92	2	412	3292	4.32756	2.85547	1	-2	-4	0	1
kumwang43_이영수	11	2007-11-10	16:47:00	128	92	2	1007	3887	1.11759	1.824	595	-2	0	0	1
kumwang43_이영수	12	2007-11-10	16:49:00	124	89	2	1009	3889	-2.88648	-1.17946	2	-4	-3	0	1
kumwang43_이영수	13	2007-11-11	05:31:00	138	97	3	331	4651	9.56394	5.49956	762	14	8	1	1
kumwang43_이영수	14	2007-11-11	05:32:00	138	96	3	332	4652	9.56191	4.49783	1	0	-1	1	1
kumwang43_이영수	15	2007-11-11	16:28:00	131	93	3	988	5308	1.22788	0.360611	656	-7	-3	0	1
kumwang43_이영수	16	2007-11-11	16:29:00	128	92	3	989	5309	-1.77415	-0.641123	1	-3	-1	0	1
kumwang43_이영수	17	2007-11-12	07:30:00	128	98	4	450	6210	-3.6064	3.79694	901	0	6	0	1
kumwang43_이영수	18	2007-11-12	07:32:00	130	89	4	452	6212	-1.61046	-5.20653	2	2	-9	0	1
kumwang43_이영수	19	2007-11-12	17:16:00	133	95	4	1036	6796	0.201932	-0.218931	584	3	6	0	1
kumwang43_이영수	20	2007-11-12	17:17:00	132	93	4	1037	6797	-0.800101	-2.22066	1	-1	-2	0	1
Result	nx	reading.date	reading.time	sbp	dbp	day	minutes	time	res.sbp	res.dbp	dtime	dsbp	ddbp	sbp.bi	dbp.bi
kumwang44_이용남	1	2007-10-11	19:40:00	134	96	0	1180	1180	0.053856	7.10009	NA	NA	NA	0	1
kumwang44_이용남	2	2007-10-12	06:45:00	138	91	1	405	1845	5.37538	2.97548	665	4	-5	1	1
kumwang44_이용남	3	2007-10-12	06:56:00	135	84	1	416	1856	2.39724	-4.01004	11	-3	-7	1	0
kumwang44_이용남	4	2007-10-12	22:14:00	121	85	1	1334	2774	-9.77845	-1.80162	918	-14	1	0	1
kumwang44_이용남	5	2007-10-12	22:24:00	116	81	1	1344	2784	-14.7586	-5.78845	10	-5	-4	0	0
kumwang44_이용남	6	2007-10-13	07:19:00	136	88	2	439	3319	6.3046	1.91581	535	20	7	1	1
kumwang44_이용남	7	2007-10-13	07:30:00	141	89	2	450	3330	11.3265	2.93029	11	5	1	1	1
kumwang44_이용남	8	2007-10-13	22:38:00	131	87	2	1358	4238	3.13089	2.12555	908	-10	-2	0	1
kumwang44_이용남	9	2007-10-13	22:49:00	127	84	2	1369	4249	-0.847246	-0.859967	11	-4	-3	0	0
kumwang44_이용남	10	2007-10-14	06:56:00	130	88	3	416	4736	3.12055	3.78111	487	3	4	0	1
kumwang44_이용남	11	2007-10-14	07:00:00	124	82	3	420	4740	-2.8715	-2.21363	4	-6	-6	0	0
kumwang44_이용남	12	2007-10-14	22:17:00	124	74	3	1337	5657	-1.04919	-9.00652	917	0	-8	0	0
kumwang44_이용남	13	2007-10-14	22:22:00	117	80	3	1342	5662	-8.03925	-2.99993	5	-7	6	0	0
kumwang44_이용남	14	2007-10-15	07:01:00	130	84	4	421	6181	5.99214	1.68326	519	13	4	0	0
kumwang44_이용남	15	2007-10-15	07:27:00	126	78	4	447	6207	2.04381	-4.28251	26	-4	-6	0	0
kumwang44_이용남	16	2007-10-15	22:10:00	112	80	4	1330	7090	-10.2014	-1.12016	883	-14	2	0	0
kumwang44_이용남	17	2007-10-15	22:16:00	123	83	4	1336	7096	0.81048	1.88774	6	11	3	0	0
kumwang44_이용남	18	2007-10-16	06:54:00	123	81	5	414	7614	1.83988	0.569623	518	0	-2	0	0
kumwang44_이용남	19	2007-10-16	07:00:00	127	81	5	420	7620	5.8518	0.577521	6	4	0	0	0
kumwang44_이용남	20	2007-10-16	22:00:00	120	82	5	1320	8520	0.640337	2.76226	900	-7	1	0	0
kumwang44_이용남	21	2007-10-16	22:09:00	118	83	5	1329	8529	-1.34178	3.7741	9	-2	1	0	0
Result	nx	reading.date	reading.time	sbp	dbp	day	minutes	time	res.sbp	res.dbp	dtime	dsbp	ddbp	sbp.bi	dbp.bi
kumwang45_장영자	1	2007-10-11	22:24:00	160	99	0	1344	1344	12.0734	3.53518	NA	NA	NA	1	1
kumwang45_장영자	2	2007-10-11	22:30:00	166	107	0	1350	1350	18.0872	11.5396	6	6	8	1	1
kumwang45_장영자	3	2007-10-11	22:37:00	136	87	0	1357	1357	-11.8968	-8.4552	7	-30	-20	1	1
kumwang45_장영자	4	2007-10-11	22:39:00	131	87	0	1359	1359	-16.8922	-8.45372	2	-5	0	0	1
kumwang45_장영자	5	2007-10-12	05:43:00	144	94	1	343	1783	-2.92036	-1.13999	424	13	7	1	1
kumwang45_장영자	6	2007-10-12	05:47:00	136	90	1	347	1787	-10.9112	-5.13703	4	-8	-4	1	1
kumwang45_장영자	7	2007-10-12	21:26:00	156	96	1	1286	2726	11.2411	1.55777	939	20	6	1	1
kumwang45_장영자	8	2007-10-12	21:28:00	138	93	1	1288	2728	-6.75436	-1.44075	2	-18	-3	1	1
kumwang45_장영자	9	2007-10-13	06:09:00	147	100	2	369	3249	3.43981	5.94476	521	9	7	1	1
kumwang45_장영자	10	2007-10-13	06:11:00	154	98	2	371	3251	10.4444	3.94624	2	7	-2	1	1
kumwang45_장영자	11	2007-10-13	21:42:00	131	92	2	1302	4182	-10.4217	-1.36489	931	-23	-6	0	1
kumwang45_장영자	12	2007-10-13	21:43:00	144	96	2	1303	4183	2.5806	2.63585	1	13	4	1	1
kumwang45_장영자	13	2007-10-14	05:52:00	140	88	3	352	4672	-0.298584	-5.00232	489	-4	-8	1	1
kumwang45_장영자	14	2007-10-14	05:54:00	132	90	3	354	4674	-8.294	-3.00084	2	-8	2	0	1
kumwang45_장영자	15	2007-10-14	20:36:00	156	95	3	1236	5556	17.7276	2.65178	882	24	5	1	1
kumwang45_장영자	16	2007-10-14	20:38:00	137	96	3	1238	5558	-1.26781	3.65326	2	-19	1	1	1
kumwang45_장영자	17	2007-10-15	06:38:00	136	96	4	398	6158	-0.892575	4.09722	600	-1	0	1	1
kumwang45_장영자	18	2007-10-15	06:40:00	143	95	4	400	6160	6.11201	3.0987	2	7	-1	1	1
kumwang45_장영자	19	2007-10-16	06:43:00	130	86	5	403	7603	-3.58054	-4.83357	1443	-13	-9	0	1
kumwang45_장영자	20	2007-10-16	06:45:00	126	87	5	405	7605	-7.57596	-3.83209	2	-4	1	0	1
Result	nx	reading.date	reading.time	sbp	dbp	day	minutes	time	res.sbp	res.dbp	dtime	dsbp	ddbp	sbp.bi	dbp.bi
kumwang46_전산옥	1	2007-10-11	15:49:00	133	82	0	949	949	20.9041	12.136	NA	NA	NA	0	0
kumwang46_전산옥	2	2007-10-11	21:18:00	120	72	0	1278	1278	8.12329	2.31115	329	-13	-10	0	0
kumwang46_전산옥	3	2007-10-11	21:20:00	110	68	0	1280	1280	-1.87538	-1.68778	2	-10	-4	0	0
kumwang46_전산옥	4	2007-10-12	07:31:00	103	67	1	451	1891	-8.46826	-2.3625	611	-7	-1	0	0
kumwang46_전산옥	5	2007-10-12	07:33:00	103	67	1	453	1893	-8.46693	-2.36143	2	0	0	0	0
kumwang46_전산옥	6	2007-10-12	20:59:00	108	72	1	1259	2699	-2.92988	3.06767	806	5	5	0	0
kumwang46_전산옥	7	2007-10-12	21:01:00	103	66	1	1261	2701	-7.92854	-2.93127	2	-5	-6	0	0
kumwang46_전산옥	8	2007-10-13	06:10:00	105	69	2	370	3250	-5.56274	0.361011	549	2	3	0	0
kumwang46_전산옥	9	2007-10-13	06:11:00	108	63	2	371	3251	-2.56207	-5.63846	1	3	-6	0	0
kumwang46_전산옥	10	2007-10-13	23:32:00	108	70	2	1412	4292	-1.86844	1.91575	1041	0	7	0	0
kumwang46_전산옥	11	2007-10-13	23:34:00	101	64	2	1414	4294	-8.8671	-4.08318	2	-7	-6	0	0
kumwang46_전산옥	12	2007-10-14	06:20:00	106	60	3	380	4700	-3.59658	-7.86704	406	5	-4	0	0
kumwang46_전산옥	13	2007-10-14	06:21:00	107	63	3	381	4701	-2.59591	-4.8665	1	1	3	0	0
kumwang46_전산옥	14	2007-10-14	21:40:00	136	72	3	1300	5620	27.0164	4.62275	919	29	9	1	0
kumwang46_전산옥	15	2007-10-14	21:41:00	116	72	3	1301	5621	7.0171	4.62329	1	-20	0	0	0
kumwang46_전산옥	16	2007-10-16	08:34:00	99	63	5	514	7714	-8.5883	-3.26244	2093	-17	-9	0	0
kumwang46_전산옥	17	2007-10-16	08:36:00	97	60	5	516	7716	-10.587	-6.26137	2	-2	-3	0	0
kumwang46_전산옥	18	2007-10-16	21:13:00	116	72	5	1273	8473	8.91743	6.14164	757	19	12	0	0
kumwang46_전산옥	19	2007-10-16	21:15:00	109	72	5	1275	8475	1.91877	6.1427	2	-7	0	0	0
Result	nx	reading.date	reading.time	sbp	dbp	day	minutes	time	res.sbp	res.dbp	dtime	dsbp	ddbp	sbp.bi	dbp.bi
kumwang47_정완묵	1	2007-10-04	14:31:00	125	70	0	871	871	-4.51438	0.206727	NA	NA	NA	0	0
kumwang47_정완묵	2	2007-10-04	21:37:00	125	68	0	1297	1297	-4.22779	-1.70318	426	0	-2	0	0
kumwang47_정완묵	3	2007-10-05	05:37:00	132	72	1	337	1777	3.09514	2.39834	480	7	4	0	0
kumwang47_정완묵	4	2007-10-05	07:38:00	135	80	1	458	1898	6.17654	10.4239	121	3	8	1	0
kumwang47_정완묵	5	2007-10-05	14:30:00	123	64	1	870	2310	-5.54628	-5.48894	412	-12	-16	0	0
kumwang47_정완묵	6	2007-10-05	21:03:00	126	68	1	1263	2703	-2.28189	-1.40582	393	3	4	0	0
kumwang47_정완묵	7	2007-10-06	07:12:00	122	64	2	432	3312	-5.87218	-5.27702	609	-4	-4	0	0
kumwang47_정완묵	8	2007-10-06	08:10:00	142	80	2	490	3370	14.1668	10.7352	58	20	16	1	0
kumwang47_정완묵	9	2007-10-06	17:20:00	132	68	2	1040	3920	4.53686	-1.14844	550	-10	-12	0	0
kumwang47_정완묵	10	2007-10-06	22:37:00	146	75	2	1357	4237	18.7501	5.9186	317	14	7	1	0
kumwang47_정완묵	11	2007-10-07	06:18:00	112	56	3	378	4698	-14.9397	-12.9839	461	-34	-19	0	0
kumwang47_정완묵	12	2007-10-07	06:54:00	125	64	3	414	4734	-1.91551	-4.97628	36	13	8	0	0
kumwang47_정완묵	13	2007-10-07	16:38:00	124	63	3	998	5318	-2.52262	-5.85277	584	-1	-1	0	0
kumwang47_정완묵	14	2007-10-07	22:39:00	124	66	3	1359	5679	-2.27975	-2.77643	361	0	3	0	0
kumwang47_정완묵	15	2007-10-08	04:44:00	124	70	4	284	6044	-2.03419	1.30077	365	0	4	0	0
kumwang47_정완묵	16	2007-10-08	07:37:00	120	69	4	457	6217	-5.91781	0.337355	173	-4	-1	0	0
kumwang47_정완묵	17	2007-10-08	18:16:00	130	72	4	1096	6856	4.51209	3.4725	639	10	3	0	0
kumwang47_정완묵	18	2007-10-08	22:27:00	120	68	4	1347	7107	-5.31905	-0.474418	251	-10	-4	0	0
kumwang47_정완묵	19	2007-10-09	07:33:00	126	68	5	453	7653	1.04828	-0.358944	546	6	0	0	0
kumwang47_정완묵	20	2007-10-09	08:28:00	130	76	5	508	7708	5.08528	7.65269	55	4	8	0	0
Result	nx	reading.date	reading.time	sbp	dbp	day	minutes	time	res.sbp	res.dbp	dtime	dsbp	ddbp	sbp.bi	dbp.bi
kumwang48_조명현	1	2007-11-19	15:28:00	121	79	0	928	928	3.39089	3.64387	NA	NA	NA	0	0
kumwang48_조명현	2	2007-11-19	15:29:00	120	75	0	929	929	2.39168	-0.357125	1	-1	-4	0	0
kumwang48_조명현	3	2007-11-20	08:37:00	113	75	1	517	1957	-3.8051	-1.37737	1028	-7	0	0	0
kumwang48_조명현	4	2007-11-20	08:39:00	114	74	1	519	1959	-2.80354	-2.37936	2	1	-1	0	0
kumwang48_조명현	5	2007-11-25	08:44:00	112	84	6	524	9164	0.826069	0.469984	7205	-2	10	0	0
Result	nx	reading.date	reading.time	sbp	dbp	day	minutes	time	res.sbp	res.dbp	dtime	dsbp	ddbp	sbp.bi	dbp.bi
kumwang49_조석형	1	2007-11-04	23:48:00	116	73	0	1428	1428	-5.31086	-0.787341	NA	NA	NA	0	0
kumwang49_조석형	2	2007-11-04	23:50:00	119	73	0	1430	1430	-2.31137	-0.788152	2	3	0	0	0
kumwang49_조석형	3	2007-11-05	07:15:00	128	78	1	435	1875	6.57458	4.03151	445	9	5	0	0
kumwang49_조석형	4	2007-11-05	07:17:00	113	71	1	437	1877	-8.42593	-2.9693	2	-15	-7	0	0
kumwang49_조석형	5	2007-11-05	22:47:00	115	74	1	1367	2807	-6.66428	-0.346201	930	2	3	0	0
kumwang49_조석형	6	2007-11-05	22:48:00	107	69	1	1368	2808	-14.6645	-5.34661	1	-8	-5	0	0
kumwang49_조석형	7	2007-11-05	22:50:00	119	67	1	1370	2810	-2.66505	-7.34742	2	12	-2	0	0
kumwang49_조석형	8	2007-11-06	06:43:00	120	73	2	403	3283	-1.78627	-1.53911	473	1	6	0	0
kumwang49_조석형	9	2007-11-06	06:44:00	118	74	2	404	3284	-3.78652	-0.539513	1	-2	1	0	0
kumwang49_조석형	10	2007-11-06	23:37:00	140	82	2	1417	4297	17.9539	7.04995	1013	22	8	1	0
kumwang49_조석형	11	2007-11-06	23:39:00	140	78	2	1419	4299	17.9533	3.04914	2	0	-4	1	0
kumwang49_조석형	12	2007-11-07	06:58:00	137	85	3	418	4738	14.8408	9.87123	439	-3	7	1	1
kumwang49_조석형	13	2007-11-07	07:00:00	131	83	3	420	4740	8.84032	7.87042	2	-6	-2	0	0
kumwang49_조석형	14	2007-11-07	07:01:00	132	79	3	421	4741	9.84007	3.87002	1	1	-4	0	0
kumwang49_조석형	15	2007-11-07	22:59:00	123	71	3	1379	5699	0.594545	-4.51823	958	-9	-8	0	0
kumwang49_조석형	16	2007-11-07	23:01:00	123	75	3	1381	5701	0.594032	-0.519038	2	0	4	0	0
kumwang49_조석형	17	2007-11-08	07:51:00	119	72	4	471	6231	-3.5418	-3.73383	530	-4	-3	0	0
kumwang49_조석형	18	2007-11-08	07:53:00	115	74	4	473	6233	-7.54231	-1.73464	2	-4	2	0	0
kumwang49_조석형	19	2007-11-08	23:59:00	116	72	4	1439	7199	-6.78988	-4.12612	966	1	-2	0	0
kumwang49_조석형	20	2007-11-09	00:00:00	116	73	5	0	7200	-6.79014	-3.12653	1	0	1	0	0
kumwang49_조석형	21	2007-11-09	07:58:00	116	78	5	478	7678	-6.91264	1.67975	478	0	5	0	0
Result	nx	reading.date	reading.time	sbp	dbp	day	minutes	time	res.sbp	res.dbp	dtime	dsbp	ddbp	sbp.bi	dbp.bi
kumwang50_조성열	1	2007-11-02	23:53:00	160	80	0	1433	1433	7.45649	-11.9807	NA	NA	NA	1	0
kumwang50_조성열	2	2007-11-02	23:54:00	145	75	0	1434	1434	-7.54506	-16.9834	1	-15	-5	1	0
kumwang50_조성열	3	2007-11-03	08:14:00	156	106	1	494	1934	2.68174	12.6659	500	11	31	1	1
kumwang50_조성열	4	2007-11-03	08:16:00	146	100	1	496	1936	-7.32135	6.66051	2	-10	-6	1	1
kumwang50_조성열	5	2007-11-04	06:33:00	160	107	2	393	3273	4.6111	10.0488	1337	14	7	1	1
kumwang50_조성열	6	2007-11-04	06:34:00	149	109	2	394	3274	-6.39045	12.0461	1	-11	2	1	1
kumwang50_조성열	7	2007-11-05	00:05:00	164	101	3	5	4325	6.98427	1.20704	1051	15	-8	1	1
kumwang50_조성열	8	2007-11-05	00:07:00	155	93	3	7	4327	-2.01882	-6.79836	2	-9	-8	1	1
kumwang50_조성열	9	2007-11-05	07:34:00	161	115	3	454	4774	3.28993	13.9941	447	6	22	1	1
kumwang50_조성열	10	2007-11-05	07:35:00	156	102	3	455	4775	-1.71161	0.991443	1	-5	-13	1	1
kumwang50_조성열	11	2007-11-05	22:59:00	145	83	3	1379	5699	-14.1405	-20.5046	924	-11	-19	1	0
kumwang50_조성열	12	2007-11-06	00:15:00	177	108	4	15	5775	17.742	4.29011	76	32	25	1	1
kumwang50_조성열	13	2007-11-06	00:17:00	162	101	4	17	5777	2.73889	-2.71529	2	-15	-7	1	1
kumwang50_조성열	14	2007-11-06	08:05:00	158	96	4	485	6245	-1.98483	-8.97951	468	-4	-5	1	1
kumwang50_조성열	15	2007-11-06	08:06:00	155	95	4	486	6246	-4.98638	-9.98221	1	-3	-1	1	1
kumwang50_조성열	16	2007-11-07	00:15:00	176	120	5	15	7215	14.5151	12.4002	969	21	25	1	1
kumwang50_조성열	17	2007-11-07	00:16:00	174	122	5	16	7216	12.5136	14.3975	1	-2	2	1	1
kumwang50_조성열	18	2007-11-07	08:08:00	143	103	5	488	7688	-19.2163	-5.87753	472	-31	-19	1	1
kumwang50_조성열	19	2007-11-07	08:09:00	155	104	5	489	7689	-7.21785	-4.88023	1	12	1	1	1
Result	nx	reading.date	reading.time	sbp	dbp	day	minutes	time	res.sbp	res.dbp	dtime	dsbp	ddbp	sbp.bi	dbp.bi
kumwang51_조성옥	1	2007-11-27	18:34:00	102	70	0	1114	1114	-16.7671	-13.779	NA	NA	NA	0	0
kumwang51_조성옥	2	2007-11-28	07:12:00	117	87	1	432	1872	-3.48814	3.18062	758	15	17	0	1
kumwang51_조성옥	3	2007-11-28	07:14:00	123	85	1	434	1874	2.50732	1.18051	2	6	-2	0	1
kumwang51_조성옥	4	2007-11-28	21:09:00	119	78	1	1269	2709	-3.38856	-5.86403	835	-4	-7	0	0
kumwang51_조성옥	5	2007-11-28	21:11:00	116	76	1	1271	2711	-6.3931	-7.86414	2	-3	-2	0	0
kumwang51_조성옥	6	2007-11-29	07:53:00	144	97	2	473	3353	20.1492	13.1016	642	28	21	1	1
kumwang51_조성옥	7	2007-11-29	07:55:00	122	94	2	475	3355	-1.8553	10.1015	2	-22	-3	0	1
kumwang51_조성옥	8	2007-11-30	07:05:00	134	87	3	425	4745	6.9887	3.02737	1390	12	-7	0	1
kumwang51_조성옥	9	2007-11-30	07:07:00	138	88	3	427	4747	10.9842	4.02727	2	4	1	1	1
kumwang51_조성옥	10	2007-12-01	08:37:00	147	92	4	517	6277	16.5103	7.94566	1530	9	4	1	1
kumwang51_조성옥	11	2007-12-01	08:38:00	132	83	4	518	6278	1.50802	-1.0544	1	-15	-9	0	0
kumwang51_조성옥	12	2007-12-02	08:18:00	140	88	5	498	7698	6.2839	3.86986	1420	8	5	1	1
kumwang51_조성옥	13	2007-12-02	08:19:00	137	87	5	499	7699	3.28163	2.86981	1	-3	-1	1	1
kumwang51_조성옥	14	2007-12-02	18:40:00	107	68	5	1120	8320	-28.1284	-16.1633	621	-30	-19	0	0
kumwang51_조성옥	15	2007-12-02	18:41:00	108	67	5	1121	8321	-27.1306	-17.1634	1	1	-1	0	0
kumwang51_조성옥	16	2007-12-03	08:37:00	152	92	6	517	9157	14.9712	7.79204	836	44	25	1	1
kumwang51_조성옥	17	2007-12-03	08:39:00	141	89	6	519	9159	3.9667	4.79193	2	-11	-3	1	1
Result	nx	reading.date	reading.time	sbp	dbp	day	minutes	time	res.sbp	res.dbp	dtime	dsbp	ddbp	sbp.bi	dbp.bi
kumwang52_조원행	1	2007-11-02	10:14:00	128	76	0	614	614	-3.50781	-1.23371	NA	NA	NA	0	0
kumwang52_조원행	2	2007-11-02	21:17:00	141	75	0	1277	1277	9.45374	-2.25296	663	13	-1	1	0
kumwang52_조원행	3	2007-11-02	21:19:00	136	78	0	1279	1279	4.45363	0.746982	2	-5	3	1	0
kumwang52_조원행	4	2007-11-03	04:44:00	136	77	1	284	1724	4.42783	-0.265938	445	0	-1	1	0
kumwang52_조원행	5	2007-11-03	04:46:00	132	76	1	286	1726	0.427712	-1.266	2	-4	-1	0	0
kumwang52_조원행	6	2007-11-03	21:41:00	133	82	1	1301	2741	1.36886	4.70453	1015	1	6	0	0
kumwang52_조원행	7	2007-11-03	21:43:00	128	78	1	1303	2743	-3.63125	0.704474	2	-5	-4	0	0
kumwang52_조원행	8	2007-11-04	05:11:00	140	82	2	311	3191	8.34277	4.69147	448	12	4	1	0
kumwang52_조원행	9	2007-11-04	05:13:00	133	78	2	313	3193	1.34265	0.691408	2	-7	-4	0	0
kumwang52_조원행	10	2007-11-04	21:02:00	121	74	2	1262	4142	-10.7124	-3.33615	949	-12	-4	0	0
kumwang52_조원행	11	2007-11-04	21:04:00	117	69	2	1264	4144	-14.7125	-8.3362	2	-4	-5	0	0
kumwang52_조원행	12	2007-11-05	05:31:00	132	80	3	331	4651	0.25812	2.64907	507	15	11	0	0
kumwang52_조원행	13	2007-11-05	05:33:00	132	83	3	333	4653	0.258004	5.64902	2	0	3	0	0
kumwang52_조원행	14	2007-11-05	21:32:00	136	80	3	1292	5612	4.2024	2.62117	959	4	-3	1	0
kumwang52_조원행	15	2007-11-05	21:34:00	129	76	3	1294	5614	-2.79771	-1.37889	2	-7	-4	0	0
kumwang52_조원행	16	2007-11-06	05:49:00	134	83	4	349	6109	2.17359	5.60674	495	5	7	0	0
kumwang52_조원행	17	2007-11-06	05:51:00	130	76	4	351	6111	-1.82653	-1.39332	2	-4	-7	0	0
kumwang52_조원행	18	2007-11-06	22:46:00	118	72	4	1366	7126	-13.8854	-5.42279	1015	-12	-4	0	0
kumwang52_조원행	19	2007-11-06	22:48:00	122	71	4	1368	7128	-9.8855	-6.42285	2	4	-1	0	0
kumwang52_조원행	20	2007-11-07	06:30:00	132	76	5	390	7590	0.0877166	-1.43626	462	10	5	0	0
kumwang52_조원행	21	2007-11-07	06:32:00	131	74	5	392	7592	-0.912399	-3.43632	2	-1	-2	0	0
kumwang52_조원행	22	2007-11-07	22:05:00	138	79	5	1325	8525	6.03351	1.53659	933	7	5	1	0
kumwang52_조원행	23	2007-11-07	22:07:00	139	79	5	1327	8527	7.03339	1.53653	2	1	0	1	0
kumwang52_조원행	24	2007-11-08	06:37:00	140	80	6	397	9037	8.00382	2.52172	510	1	1	1	0
kumwang52_조원행	25	2007-11-08	06:39:00	136	80	6	399	9039	4.0037	2.52167	2	-4	0	1	0
Result	nx	reading.date	reading.time	sbp	dbp	day	minutes	time	res.sbp	res.dbp	dtime	dsbp	ddbp	sbp.bi	dbp.bi
kumwang53_조이숙	1	2007-10-26	13:04:00	129	93	0	784	784	2.31074	6.05893	NA	NA	NA	0	1
kumwang53_조이숙	2	2007-10-27	09:22:00	120	77	1	562	2002	-4.27743	-7.17346	1218	-9	-16	0	0
kumwang53_조이숙	3	2007-10-27	09:23:00	124	84	1	563	2003	-0.275455	-0.171186	1	4	7	0	0
kumwang53_조이숙	4	2007-10-30	07:20:00	119	75	4	440	6200	3.03523	0.365496	4197	-5	-9	0	0
kumwang53_조이숙	5	2007-10-30	07:22:00	117	75	4	442	6202	1.03919	0.37004	2	-2	0	0	0
kumwang53_조이숙	6	2007-11-01	19:22:00	107	67	6	1162	9802	-1.83227	0.550182	3600	-10	-8	0	0
Result	nx	reading.date	reading.time	sbp	dbp	day	minutes	time	res.sbp	res.dbp	dtime	dsbp	ddbp	sbp.bi	dbp.bi
kumwang54_조준영	1	2007-11-29	17:03:00	103	66	0	1023	1023	0.325564	1.22249	NA	NA	NA	0	0
kumwang54_조준영	2	2007-11-29	17:05:00	107	60	0	1025	1025	4.32504	-4.77879	2	4	-6	0	0
kumwang54_조준영	3	2007-11-29	21:03:00	103	66	0	1263	1263	0.262184	1.06829	238	-4	6	0	0
kumwang54_조준영	4	2007-11-30	06:03:00	104	68	1	363	1803	1.11958	2.72134	540	1	2	0	0
kumwang54_조준영	5	2007-11-30	20:17:00	96	66	1	1217	2657	-7.10595	0.172633	854	-8	-2	0	0
kumwang54_조준영	6	2007-12-01	06:14:00	103	70	2	374	3254	-0.263608	3.78905	597	7	4	0	0
kumwang54_조준영	7	2007-12-01	20:06:00	102	61	2	1206	4086	-1.48333	-5.74551	832	-1	-9	0	0
kumwang54_조준영	8	2007-12-02	06:43:00	108	67	3	403	4723	4.34845	-0.154792	637	6	6	0	0
kumwang54_조준영	9	2007-12-02	20:18:00	99	68	3	1218	5538	-4.86678	0.321562	815	-9	1	0	0
kumwang54_조준영	10	2007-12-03	05:42:00	100	68	4	342	6102	-4.01572	-0.040813	564	1	0	0	0
kumwang54_조준영	11	2007-12-03	20:34:00	115	75	4	1234	6994	10.7487	6.38607	892	15	7	0	0
kumwang54_조준영	12	2007-12-04	05:35:00	101	64	5	335	7535	-3.39415	-4.96153	541	-14	-11	0	0
Result	nx	reading.date	reading.time	sbp	dbp	day	minutes	time	res.sbp	res.dbp	dtime	dsbp	ddbp	sbp.bi	dbp.bi
kumwang55_조혜숙	1	2007-10-18	19:58:00	100	65	0	1198	1198	-1.60146	2.71643	NA	NA	NA	0	0
kumwang55_조혜숙	2	2007-10-19	06:20:00	98	55	1	380	1820	-4.57395	-8.23988	622	-2	-10	0	0
kumwang55_조혜숙	3	2007-10-19	06:22:00	100	65	1	382	1822	-2.57707	1.75704	2	2	10	0	0
kumwang55_조혜숙	4	2007-10-19	22:44:00	106	72	1	1364	2804	1.8876	7.24723	982	6	7	0	0
kumwang55_조혜숙	5	2007-10-19	22:46:00	114	72	1	1366	2806	9.88447	7.24415	2	8	0	0	0
kumwang55_조혜숙	6	2007-10-20	06:25:00	100	56	2	385	3265	-4.83317	-9.46155	459	-14	-16	0	0
kumwang55_조혜숙	7	2007-10-20	06:26:00	102	54	2	386	3266	-2.83473	-11.4631	1	2	-2	0	0
kumwang55_조혜숙	8	2007-10-20	20:58:00	108	72	2	1258	4138	1.80192	5.19622	872	6	18	0	0
kumwang55_조혜숙	9	2007-10-20	21:00:00	110	70	2	1260	4140	3.79879	3.19315	2	2	-2	0	0
kumwang55_조혜숙	10	2007-10-21	22:08:00	118	80	3	1328	5648	9.44107	10.8746	1508	8	10	0	0
kumwang55_조혜숙	11	2007-10-21	22:10:00	118	76	3	1330	5650	9.43795	6.87154	2	0	-4	0	0
kumwang55_조혜숙	12	2007-10-22	07:15:00	103	64	4	435	6195	-6.41415	-5.96639	545	-15	-12	0	0
kumwang55_조혜숙	13	2007-10-22	07:17:00	96	60	4	437	6197	-13.4173	-9.96946	2	-7	-4	0	0
Result	nx	reading.date	reading.time	sbp	dbp	day	minutes	time	res.sbp	res.dbp	dtime	dsbp	ddbp	sbp.bi	dbp.bi
kumwang56_주이숙	1	2007-10-28	08:12:00	116	75	0	492	492	-3.04447	3.7249	NA	NA	NA	0	0
kumwang56_주이숙	2	2007-10-28	09:30:00	122	67	0	570	570	2.91831	-4.29364	78	6	-8	0	0
kumwang56_주이숙	3	2007-10-28	13:19:00	122	73	0	799	799	2.80902	1.65193	229	0	6	0	0
kumwang56_주이숙	4	2007-10-29	07:53:00	120	72	1	473	1913	0.277382	0.38716	1114	-2	-1	0	0
kumwang56_주이숙	5	2007-10-29	09:03:00	130	69	1	543	1983	10.244	-2.62948	70	10	-3	0	0
kumwang56_주이숙	6	2007-10-29	22:58:00	113	70	1	1378	2818	-7.15451	-1.82794	835	-17	1	0	0
kumwang56_주이숙	7	2007-10-30	06:49:00	117	76	2	409	3289	-3.37929	4.06012	471	4	6	0	0
kumwang56_주이숙	8	2007-10-30	08:06:00	127	75	2	486	3366	6.58396	3.04182	77	10	-1	0	0
kumwang56_주이숙	9	2007-10-30	14:34:00	109	68	2	874	3754	-11.6012	-4.0504	388	-18	-7	0	0
kumwang56_주이숙	10	2007-10-30	14:36:00	114	71	2	876	3756	-6.60216	-1.05088	2	5	3	0	0
kumwang56_주이숙	11	2007-10-31	07:26:00	126	71	3	446	4766	4.91584	-1.29093	1010	12	0	0	0
kumwang56_주이숙	12	2007-10-31	17:14:00	108	72	3	1034	5354	-13.3648	-0.430684	588	-18	1	0	0
kumwang56_주이숙	13	2007-10-31	21:13:00	127	76	3	1273	5593	5.52117	3.51251	239	19	4	0	0
kumwang56_주이숙	14	2007-10-31	23:42:00	127	76	3	1422	5742	5.45006	3.4771	149	0	0	0	0
kumwang56_주이숙	15	2007-11-01	07:22:00	124	70	4	442	6202	2.23053	-2.63223	460	-3	-6	0	0
kumwang56_주이숙	16	2007-11-01	08:34:00	126	71	4	514	6274	4.19617	-1.64935	72	2	1	0	0
Result	nx	reading.date	reading.time	sbp	dbp	day	minutes	time	res.sbp	res.dbp	dtime	dsbp	ddbp	sbp.bi	dbp.bi
kumwang57_최종신	1	2007-10-01	15:14:00	110	69	0	914	914	-1.22672	-2.69814	NA	NA	NA	0	0
kumwang57_최종신	2	2007-10-01	20:22:00	114	72	0	1222	1222	2.58262	0.224214	308	4	3	0	0
kumwang57_최종신	3	2007-10-02	08:31:00	110	71	1	511	1951	-1.86865	-0.959561	729	-4	-1	0	0
kumwang57_최종신	4	2007-10-02	11:09:00	104	78	1	669	2109	-7.96646	6.00061	158	-6	7	0	0
kumwang57_최종신	5	2007-10-02	15:11:00	138	73	1	911	2351	25.8837	0.939603	242	34	-5	1	0
kumwang57_최종신	6	2007-10-02	16:59:00	113	73	1	1019	2459	0.816885	0.912377	108	-25	0	0	0
kumwang57_최종신	7	2007-10-02	20:56:00	108	72	1	1256	2696	-4.32982	-0.147369	237	-5	-1	0	0
kumwang57_최종신	8	2007-10-03	07:43:00	114	72	2	463	3343	1.26967	-0.310472	647	6	0	0	0
kumwang57_최종신	9	2007-10-03	10:33:00	108	73	2	633	3513	-4.83557	0.646672	170	-6	1	0	0
kumwang57_최종신	10	2007-10-03	18:42:00	112	73	2	1122	4002	-1.13827	0.5234	489	4	0	0	0
kumwang57_최종신	11	2007-10-03	18:45:00	128	84	2	1125	4005	14.8599	11.5226	3	16	11	0	0
kumwang57_최종신	12	2007-10-03	18:47:00	127	78	2	1127	4007	13.8586	5.52214	2	-1	-6	0	0
kumwang57_최종신	13	2007-10-03	19:45:00	112	76	2	1185	4065	-1.17727	3.50752	58	-15	-2	0	0
kumwang57_최종신	14	2007-10-03	22:44:00	94	61	2	1364	4244	-19.2881	-11.5376	179	-18	-15	0	0
kumwang57_최종신	15	2007-10-03	22:48:00	92	63	2	1368	4248	-21.2905	-9.53861	4	-2	2	0	0
kumwang57_최종신	16	2007-10-04	07:52:00	124	77	3	472	4792	10.3727	4.32425	544	32	14	0	0
kumwang57_최종신	17	2007-10-04	10:57:00	108	67	3	657	4977	-5.74182	-5.72239	185	-16	-10	0	0
kumwang57_최종신	18	2007-10-04	15:38:00	112	65	3	938	5258	-1.91576	-7.79323	281	4	-2	0	0
kumwang57_최종신	19	2007-10-04	19:09:00	113	74	3	1149	5469	-1.04637	1.15358	211	1	9	0	0
kumwang57_최종신	20	2007-10-04	21:44:00	108	71	3	1304	5624	-6.14232	-1.88549	155	-5	-3	0	0
kumwang57_최종신	21	2007-10-05	07:45:00	111	72	4	465	6225	-3.51436	-1.037	601	3	1	0	0
kumwang57_최종신	22	2007-10-05	10:38:00	115	72	4	638	6398	0.378553	-1.08061	173	4	0	0	0
kumwang57_최종신	23	2007-10-05	16:33:00	106	74	4	993	6753	-8.8412	0.829896	355	-9	2	0	0
kumwang57_최종신	24	2007-10-06	07:21:00	134	80	5	441	7641	18.6091	6.60604	888	28	6	0	0
kumwang57_최종신	25	2007-10-06	09:56:00	118	71	5	596	7796	2.51316	-2.43304	155	-16	-9	0	0
kumwang57_최종신	26	2007-10-06	18:57:00	115	76	5	1137	8337	-0.821733	2.43058	541	-3	5	0	0
Result	nx	reading.date	reading.time	sbp	dbp	day	minutes	time	res.sbp	res.dbp	dtime	dsbp	ddbp	sbp.bi	dbp.bi
kumwang58_한만섭	1	2007-10-18	22:11:00	138	92	0	1331	1331	2.72743	-1.23796	NA	NA	NA	1	1
kumwang58_한만섭	2	2007-10-18	22:12:00	140	92	0	1332	1332	4.72954	-1.23773	1	2	0	1	1
kumwang58_한만섭	3	2007-10-18	22:13:00	152	87	0	1333	1333	16.7317	-6.2375	1	12	-5	1	1
kumwang58_한만섭	4	2007-10-19	05:20:00	133	93	1	320	1760	-1.36526	-0.139304	427	-19	6	0	1
kumwang58_한만섭	5	2007-10-19	05:21:00	131	93	1	321	1761	-3.36315	-0.139074	1	-2	0	0	1
kumwang58_한만섭	6	2007-10-20	05:03:00	139	96	2	303	3183	7.64431	3.18795	1422	8	3	1	1
kumwang58_한만섭	7	2007-10-20	05:03:00	133	99	2	303	3183	1.64431	6.18795	0	-6	3	0	1
kumwang58_한만섭	8	2007-10-20	05:04:00	129	98	2	304	3184	-2.35358	5.18818	1	-4	-1	0	1
kumwang58_한만섭	9	2007-10-20	05:05:00	131	92	2	305	3185	-0.351464	-0.811589	1	2	-6	0	1
kumwang58_한만섭	10	2007-10-20	05:06:00	128	100	2	306	3186	-3.34935	7.18864	1	-3	8	0	1
kumwang58_한만섭	11	2007-10-21	05:05:00	116	89	3	305	4625	-12.3059	-3.48042	1439	-12	-11	0	1
kumwang58_한만섭	12	2007-10-21	05:06:00	117	86	3	306	4626	-11.3038	-6.48019	1	1	-3	0	1
kumwang58_한만섭	13	2007-10-21	05:07:00	124	95	3	307	4627	-4.30171	2.52004	1	7	9	0	1
kumwang58_한만섭	14	2007-10-21	05:07:00	117	88	3	307	4627	-11.3017	-4.47996	0	-7	-7	0	1
kumwang58_한만섭	15	2007-10-22	05:36:00	126	96	4	336	6096	0.805141	3.85787	1469	9	8	0	1
kumwang58_한만섭	16	2007-10-22	05:37:00	120	91	4	337	6097	-5.19274	-1.1419	1	-6	-5	0	1
kumwang58_한만섭	17	2007-10-22	05:38:00	118	90	4	338	6098	-7.19063	-2.14167	1	-2	-1	0	1
kumwang58_한만섭	18	2007-10-22	05:38:00	120	91	4	338	6098	-5.19063	-1.14167	0	2	1	0	1
kumwang58_한만섭	19	2007-10-23	04:54:00	128	97	5	294	7494	5.76183	5.17938	1396	8	6	0	1
kumwang58_한만섭	20	2007-10-23	04:54:00	140	92	5	294	7494	17.7618	0.179375	0	12	-5	1	1
kumwang58_한만섭	21	2007-10-23	04:55:00	132	87	5	295	7495	9.76395	-4.82039	1	-8	-5	0	1
Result	nx	reading.date	reading.time	sbp	dbp	day	minutes	time	res.sbp	res.dbp	dtime	dsbp	ddbp	sbp.bi	dbp.bi
kumwang59_한수자	1	2007-11-08	14:51:00	99	42	0	891	891	-8.14009	-20.6522	NA	NA	NA	0	0
kumwang59_한수자	2	2007-11-08	21:48:00	118	83	0	1308	1308	11.0217	20.3093	417	19	41	0	0
kumwang59_한수자	3	2007-11-08	21:49:00	84	64	0	1309	1309	-22.9779	1.30919	1	-34	-19	0	0
kumwang59_한수자	4	2007-11-08	21:51:00	104	45	0	1311	1311	-2.97715	-17.691	2	20	-19	0	0
kumwang59_한수자	5	2007-11-08	21:53:00	99	54	0	1313	1313	-7.97637	-8.69118	2	-5	9	0	0
kumwang59_한수자	6	2007-11-09	07:00:00	114	43	1	420	1860	7.23584	-19.7416	547	15	-11	0	0
kumwang59_한수자	7	2007-11-09	07:02:00	107	60	1	422	1862	0.236613	-2.74183	2	-7	17	0	0
kumwang59_한수자	8	2007-11-09	07:05:00	124	76	1	425	1865	17.2378	13.2579	3	17	16	0	0
kumwang59_한수자	9	2007-11-09	07:07:00	118	85	1	427	1867	11.2386	22.2577	2	-6	9	0	1
kumwang59_한수자	10	2007-11-09	22:56:00	112	83	1	1376	2816	5.60672	20.1701	949	-6	-2	0	0
kumwang59_한수자	11	2007-11-09	22:57:00	115	84	1	1377	2817	8.60711	21.17	1	3	1	0	0
kumwang59_한수자	12	2007-11-09	23:00:00	100	46	1	1380	2820	-6.39173	-16.8302	3	-15	-38	0	0
kumwang59_한수자	13	2007-11-09	23:02:00	105	52	1	1382	2822	-1.39095	-10.8304	2	5	6	0	0
kumwang59_한수자	14	2007-11-10	06:52:00	118	84	2	412	3292	11.7914	21.1262	470	13	32	0	0
kumwang59_한수자	15	2007-11-10	06:53:00	120	82	2	413	3293	13.7918	19.1261	1	2	-2	0	0
kumwang59_한수자	16	2007-11-10	06:56:00	100	44	2	416	3296	-6.20706	-18.8742	3	-20	-38	0	0
kumwang59_한수자	17	2007-11-10	06:58:00	95	45	2	418	3298	-11.2063	-17.8743	2	-5	1	0	0
kumwang59_한수자	18	2007-11-10	23:28:00	115	83	2	1408	4288	9.17778	20.0343	990	20	38	0	0
kumwang59_한수자	19	2007-11-10	23:30:00	116	86	2	1410	4290	10.1786	23.0341	2	1	3	0	1
kumwang59_한수자	20	2007-11-10	23:32:00	101	49	2	1412	4292	-4.82066	-13.9661	2	-15	-37	0	0
kumwang59_한수자	21	2007-11-10	23:34:00	100	51	2	1414	4294	-5.81989	-11.9662	2	-1	2	0	0
kumwang59_한수자	22	2007-11-11	06:39:00	105	76	3	399	4719	-0.655009	12.9945	425	5	25	0	0
kumwang59_한수자	23	2007-11-11	06:41:00	108	76	3	401	4721	2.34577	12.9944	2	3	0	0	0
kumwang59_한수자	24	2007-11-11	06:46:00	95	49	3	406	4726	-10.6523	-14.0061	5	-13	-27	0	0
kumwang59_한수자	25	2007-11-11	06:48:00	92	48	3	408	4728	-13.6515	-15.0063	2	-3	-1	0	0
kumwang59_한수자	26	2007-11-11	23:00:00	100	60	3	1380	5700	-5.27443	-3.09597	972	8	12	0	0
kumwang59_한수자	27	2007-11-11	23:02:00	100	64	3	1382	5702	-5.27365	0.903843	2	0	4	0	0
kumwang59_한수자	28	2007-11-11	23:03:00	102	56	3	1383	5703	-3.27326	-7.09625	1	2	-8	0	0
kumwang59_한수자	29	2007-11-11	23:05:00	101	54	3	1385	5705	-4.27249	-9.09643	2	-1	-2	0	0
kumwang59_한수자	30	2007-11-12	06:17:00	95	44	4	377	6137	-10.1049	-19.1363	432	-6	-10	0	0
kumwang59_한수자	31	2007-11-12	06:19:00	94	51	4	379	6139	-11.1041	-12.1365	2	-1	7	0	0
kumwang59_한수자	32	2007-11-12	06:21:00	116	79	4	381	6141	10.8967	15.8633	2	22	28	0	0
kumwang59_한수자	33	2007-11-12	06:22:00	116	86	4	382	6142	10.897	22.8632	1	0	7	0	1
kumwang59_한수자	34	2007-11-12	22:37:00	108	70	4	1357	7117	3.2753	6.77328	975	-8	-16	0	0
kumwang59_한수자	35	2007-11-12	22:39:00	110	72	4	1359	7119	5.27608	8.77309	2	2	2	0	0
kumwang59_한수자	36	2007-11-12	22:41:00	95	43	4	1361	7121	-9.72315	-20.2271	2	-15	-29	0	0
kumwang59_한수자	37	2007-11-12	22:43:00	96	43	4	1363	7123	-8.72237	-20.2273	2	1	0	0	0
kumwang59_한수자	38	2007-11-13	06:05:00	117	84	5	365	7565	12.4491	20.7319	442	21	41	0	0
kumwang59_한수자	39	2007-11-13	06:07:00	117	85	5	367	7567	12.4499	21.7318	2	0	1	0	1
kumwang59_한수자	40	2007-11-13	06:09:00	103	48	5	369	7569	-1.54935	-15.2684	2	-14	-37	0	0
kumwang59_한수자	41	2007-11-13	06:10:00	103	53	5	370	7570	-1.54896	-10.2685	1	0	5	0	0
Result	nx	reading.date	reading.time	sbp	dbp	day	minutes	time	res.sbp	res.dbp	dtime	dsbp	ddbp	sbp.bi	dbp.bi
kumwang60_한인숙	1	2007-11-02	14:58:00	133	89	0	898	898	5.52455	2.91163	NA	NA	NA	0	1
kumwang60_한인숙	2	2007-11-02	15:00:00	131	83	0	900	900	3.53018	-3.08573	2	-2	-6	0	0
kumwang60_한인숙	3	2007-11-02	23:48:00	138	91	0	1428	1428	12.0179	5.60969	528	7	8	1	1
kumwang60_한인숙	4	2007-11-02	23:49:00	131	89	0	1429	1429	5.02074	3.61101	1	-7	-2	0	1
kumwang60_한인숙	5	2007-11-03	07:14:00	117	80	1	434	1874	-7.72539	-4.80288	445	-14	-9	0	0
kumwang60_한인숙	6	2007-11-03	07:16:00	114	81	1	436	1876	-10.7198	-3.80025	2	-3	1	0	0
kumwang60_한인숙	7	2007-11-03	22:46:00	123	87	1	1366	2806	0.900697	3.42464	930	9	6	0	1
kumwang60_한인숙	8	2007-11-03	22:47:00	120	81	1	1367	2807	-2.09648	-2.57404	1	-3	-6	0	0
kumwang60_한인숙	9	2007-11-04	06:32:00	116	79	2	392	3272	-4.78626	-3.96159	465	-4	-2	0	0
kumwang60_한인숙	10	2007-11-04	06:33:00	112	75	2	393	3273	-8.78344	-7.96027	1	-4	-4	0	0
kumwang60_한인숙	11	2007-11-04	23:35:00	119	82	2	1415	4295	1.09624	0.385793	1022	7	7	0	0
kumwang60_한인숙	12	2007-11-04	23:36:00	114	79	2	1416	4296	-3.90095	-2.61289	1	-5	-3	0	0
kumwang60_한인숙	13	2007-11-05	07:02:00	111	86	3	422	4742	-5.64426	4.97453	446	-3	7	0	1
kumwang60_한인숙	14	2007-11-05	07:03:00	122	90	3	423	4743	5.35856	8.97585	1	11	4	0	1
kumwang60_한인숙	15	2007-11-05	22:53:00	124	80	3	1373	5693	10.0354	0.227086	950	2	-10	0	0
kumwang60_한인숙	16	2007-11-05	22:55:00	115	84	3	1375	5695	1.041	4.22972	2	-9	4	0	0
kumwang60_한인숙	17	2007-11-06	07:53:00	107	79	4	473	6233	-5.44308	-0.0616848	538	-8	-5	0	0
kumwang60_한인숙	18	2007-11-06	07:53:00	113	79	4	473	6233	0.556916	-0.0616848	0	6	0	0	0
kumwang60_한인숙	19	2007-11-07	07:15:00	111	74	5	435	7635	2.50732	-3.21512	1402	-2	-5	0	0
kumwang60_한인숙	20	2007-11-07	07:16:00	110	75	5	436	7636	1.51013	-2.21381	1	-1	1	0	0
Result	nx	reading.date	reading.time	sbp	dbp	day	minutes	time	res.sbp	res.dbp	dtime	dsbp	ddbp	sbp.bi	dbp.bi
kumwang61_한정자	1	2007-10-02	15:19:00	133	80	0	919	919	8.36062	0.47819	NA	NA	NA	0	0
kumwang61_한정자	2	2007-10-02	21:29:00	100	72	0	1289	1289	-23.8813	-7.04828	370	-33	-8	0	0
kumwang61_한정자	3	2007-10-03	06:40:00	124	80	1	400	1840	1.24774	1.65691	551	24	8	0	0
kumwang61_한정자	4	2007-10-03	12:45:00	136	85	1	765	2205	13.9956	7.12404	365	12	5	1	1
kumwang61_한정자	5	2007-10-03	17:03:00	122	69	1	1023	2463	0.524256	-8.54576	258	-14	-16	0	0
kumwang61_한정자	6	2007-10-03	21:59:00	113	69	1	1319	2759	-7.86924	-8.16693	296	-9	0	0	0
kumwang61_한정자	7	2007-10-04	05:50:00	124	92	2	350	3230	4.09583	15.4359	471	11	23	0	1
kumwang61_한정자	8	2007-10-04	13:42:00	113	72	2	822	3702	-5.93705	-3.96006	472	-11	-20	0	0
kumwang61_한정자	9	2007-10-04	17:52:00	130	88	2	1072	3952	11.5752	12.3599	250	17	16	0	1
kumwang61_한정자	10	2007-10-04	22:51:00	110	75	2	1371	4251	-7.81215	-0.257437	299	-20	-13	0	0
kumwang61_한정자	11	2007-10-05	06:03:00	115	76	3	363	4683	-1.92699	1.29545	432	5	1	0	0
kumwang61_한정자	12	2007-10-05	09:59:00	117	66	3	599	4919	0.55657	-8.40251	236	2	-10	0	0
kumwang61_한정자	13	2007-10-05	18:08:00	127	76	3	1088	5408	11.5585	2.22332	489	10	10	0	0
kumwang61_한정자	14	2007-10-05	21:13:00	122	72	3	1273	5593	6.93759	-1.53991	185	-5	-4	0	0
kumwang61_한정자	15	2007-10-06	05:59:00	113	70	4	359	6119	-0.984645	-2.86673	526	-9	-2	0	0
kumwang61_한정자	16	2007-10-06	11:42:00	120	74	4	702	6462	6.71816	1.57225	343	7	4	0	0
kumwang61_한정자	17	2007-10-06	15:45:00	120	74	4	945	6705	7.21606	1.88325	243	0	0	0	0
kumwang61_한정자	18	2007-10-06	22:19:00	107	76	4	1339	7099	-4.97664	4.3875	394	-13	2	0	0
kumwang61_한정자	19	2007-10-07	06:20:00	63	50	5	380	7580	-47.9911	-20.9969	481	-44	-26	0	0
kumwang61_한정자	20	2007-10-07	11:05:00	139	84	5	665	7865	28.5929	13.3678	285	76	34	1	0
Result	nx	reading.date	reading.time	sbp	dbp	day	minutes	time	res.sbp	res.dbp	dtime	dsbp	ddbp	sbp.bi	dbp.bi
kumwang62_한화자	1	2007-11-08	15:27:00	147	103	0	927	927	4.09752	10.707	NA	NA	NA	1	1
kumwang62_한화자	2	2007-11-08	15:29:00	161	100	0	929	929	18.0992	7.7082	2	14	-3	1	1
kumwang62_한화자	3	2007-11-08	21:03:00	148	91	0	1263	1263	5.38822	-1.09638	334	-13	-9	1	1
kumwang62_한화자	4	2007-11-08	21:05:00	139	86	0	1265	1265	-3.61005	-6.09521	2	-9	-5	1	1
kumwang62_한화자	5	2007-11-09	06:32:00	136	91	1	392	1832	-6.11949	-0.763466	567	-3	5	1	1
kumwang62_한화자	6	2007-11-09	06:33:00	128	86	1	393	1833	-14.1186	-5.76288	1	-8	-5	0	1
kumwang62_한화자	7	2007-11-09	22:22:00	134	86	1	1342	2782	-7.29758	-5.20763	949	6	0	0	1
kumwang62_한화자	8	2007-11-09	22:23:00	131	82	1	1343	2783	-10.2967	-9.20705	1	-3	-4	0	0
kumwang62_한화자	9	2007-11-10	06:51:00	135	87	2	411	3291	-5.8572	-3.90983	508	4	5	1	1
kumwang62_한화자	10	2007-11-10	23:20:00	150	102	2	1400	4280	9.99846	11.6688	989	15	15	1	1
kumwang62_한화자	11	2007-11-11	07:16:00	144	92	3	436	4756	4.41029	1.94733	476	-6	-10	1	1
kumwang62_한화자	12	2007-11-11	07:17:00	137	87	3	437	4757	-2.58885	-3.05209	1	-7	-5	1	1
kumwang62_한화자	13	2007-11-11	23:36:00	150	94	3	1416	5736	11.2582	4.52071	979	13	7	1	1
kumwang62_한화자	14	2007-11-11	23:37:00	144	89	3	1417	5737	5.25903	-0.478704	1	-6	-5	1	1
kumwang62_한화자	15	2007-11-12	07:26:00	135	91	4	446	6206	-3.3352	1.7957	469	-9	2	1	1
kumwang62_한화자	16	2007-11-12	21:46:00	144	97	4	1306	7066	6.40885	8.29888	860	9	6	1	1
kumwang62_한화자	17	2007-11-12	21:47:00	136	82	4	1307	7067	-1.59028	-6.70054	1	-8	-15	1	0
kumwang62_한화자	18	2007-11-13	07:07:00	127	84	5	427	7627	-10.1058	-4.37289	560	-9	2	0	0
Result	nx	reading.date	reading.time	sbp	dbp	day	minutes	time	res.sbp	res.dbp	dtime	dsbp	ddbp	sbp.bi	dbp.bi
kumwang63_허경구	1	2007-11-29	11:16:00	98	66	0	676	676	-9.60529	-5.53056	NA	NA	NA	0	0
kumwang63_허경구	2	2007-11-29	11:17:00	93	63	0	677	677	-14.6087	-8.53255	1	-5	-3	0	0
kumwang63_허경구	3	2007-11-29	22:02:00	127	83	0	1322	1322	17.197	10.1807	645	34	20	0	0
kumwang63_허경구	4	2007-11-29	22:04:00	122	80	0	1324	1324	12.1902	7.1767	2	-5	-3	0	0
kumwang63_허경구	5	2007-12-02	07:10:00	120	80	3	430	4750	-1.46519	0.34193	3426	-2	0	0	0
kumwang63_허경구	6	2007-12-02	21:40:00	117	74	3	1300	5620	-7.42496	-7.39369	870	-3	-6	0	0
kumwang63_허경구	7	2007-12-03	21:28:00	133	88	4	1288	7048	3.71693	3.75749	1428	16	14	0	1
Result	nx	reading.date	reading.time	sbp	dbp	day	minutes	time	res.sbp	res.dbp	dtime	dsbp	ddbp	sbp.bi	dbp.bi
kumwang64_허남수	1	2007-10-19	06:38:00	142	86	0	398	398	2.5451	-2.79903	NA	NA	NA	1	1
kumwang64_허남수	2	2007-10-19	06:40:00	135	89	0	400	400	-4.44707	0.205143	2	-7	3	1	1
kumwang64_허남수	3	2007-10-19	20:54:00	137	89	0	1254	1254	0.895796	1.98872	854	2	0	1	1
kumwang64_허남수	4	2007-10-19	20:55:00	134	84	0	1255	1255	-2.10029	-3.00919	1	-3	-5	0	0
kumwang64_허남수	5	2007-10-20	06:58:00	137	85	1	418	1858	3.26007	-0.749826	603	3	1	1	1
kumwang64_허남수	6	2007-10-20	06:59:00	132	82	1	419	1859	-1.73602	-3.74774	1	-5	-3	0	0
kumwang64_허남수	7	2007-10-20	21:27:00	137	86	1	1287	2727	6.66165	2.06508	868	5	4	1	1
kumwang64_허남수	8	2007-10-20	21:28:00	137	92	1	1288	2728	6.66556	8.06717	1	0	6	1	1
kumwang64_허남수	9	2007-10-21	06:28:00	124	87	2	388	3268	-4.22068	4.19496	540	-13	-5	0	1
kumwang64_허남수	10	2007-10-21	06:29:00	124	84	2	389	3269	-4.21677	1.19704	1	0	-3	0	0
kumwang64_허남수	11	2007-10-21	21:40:00	108	70	2	1300	4180	-16.6508	-10.9003	911	-16	-14	0	0
kumwang64_허남수	12	2007-10-21	21:41:00	111	69	2	1301	4181	-13.6469	-11.8982	1	3	-1	0	0
kumwang64_허남수	13	2007-10-22	07:04:00	135	88	3	424	4744	12.5569	8.27758	563	24	19	1	1
kumwang64_허남수	14	2007-10-22	07:05:00	144	95	3	425	4745	21.5608	15.2797	1	9	7	1	1
kumwang64_허남수	15	2007-10-23	08:05:00	125	78	4	485	6245	8.43237	1.41242	1500	-19	-17	0	0
kumwang64_허남수	16	2007-10-23	08:07:00	101	67	4	487	6247	-15.5598	-9.58341	2	-24	-11	0	0
Result	nx	reading.date	reading.time	sbp	dbp	day	minutes	time	res.sbp	res.dbp	dtime	dsbp	ddbp	sbp.bi	dbp.bi
kumwang65_허남훈	1	2007-10-18	11:57:00	155	95	0	717	717	14.7549	5.42442	NA	NA	NA	1	1
kumwang65_허남훈	2	2007-10-18	11:58:00	141	85	0	718	718	0.754715	-4.57651	1	-14	-10	1	1
kumwang65_허남훈	3	2007-10-19	06:50:00	132	91	1	410	1850	-8.44108	0.37612	1132	-9	6	0	1
kumwang65_허남훈	4	2007-10-19	06:50:00	126	86	1	410	1850	-14.4411	-4.62388	0	-6	-5	0	1
kumwang65_허남훈	5	2007-10-19	20:49:00	126	88	1	1249	2689	-14.5862	-3.40016	839	0	2	0	1
kumwang65_허남훈	6	2007-10-19	20:50:00	128	88	1	1250	2690	-12.5864	-3.40108	1	2	0	0	1
kumwang65_허남훈	7	2007-10-20	06:53:00	166	96	2	413	3293	25.3093	4.041	603	38	8	1	1
kumwang65_허남훈	8	2007-10-20	06:55:00	155	92	2	415	3295	14.309	0.0391479	2	-11	-4	1	1
kumwang65_허남훈	9	2007-10-20	21:23:00	150	94	2	1283	4163	9.15886	1.23604	868	-5	2	1	1
kumwang65_허남훈	10	2007-10-20	21:24:00	147	98	2	1284	4164	6.15869	5.23511	1	-3	4	1	1
kumwang65_허남훈	11	2007-10-21	06:35:00	144	105	3	395	4715	3.06339	11.7253	551	-3	7	1	1
kumwang65_허남훈	12	2007-10-21	06:36:00	109	92	3	396	4716	-31.9368	-1.27562	1	-35	-13	0	1
kumwang65_허남훈	13	2007-10-21	21:37:00	152	92	3	1297	5617	10.9074	-2.10926	901	43	0	1	1
kumwang65_허남훈	14	2007-10-21	21:37:00	141	86	3	1297	5617	-0.0926211	-8.10926	0	-11	-6	1	1
kumwang65_허남훈	15	2007-10-22	08:46:00	140	91	4	526	6286	-1.20833	-3.72825	669	-1	5	1	1
kumwang65_허남훈	16	2007-10-22	08:48:00	140	100	4	528	6288	-1.20868	5.2699	2	0	9	1	1
kumwang65_허남훈	17	2007-10-23	08:46:00	147	96	5	526	7726	5.5426	-0.0605926	1438	7	-4	1	1
kumwang65_허남훈	18	2007-10-23	08:48:00	136	94	5	528	7728	-5.45774	-2.06244	2	-11	-2	1	1
Result	nx	reading.date	reading.time	sbp	dbp	day	minutes	time	res.sbp	res.dbp	dtime	dsbp	ddbp	sbp.bi	dbp.bi
kumwang66_현원기	1	2007-11-03	06:59:00	112	76	0	419	419	-13.2553	-5.84943	NA	NA	NA	0	0
kumwang66_현원기	2	2007-11-03	07:01:00	115	73	0	421	421	-10.2579	-8.85409	2	3	-3	0	0
kumwang66_현원기	3	2007-11-04	01:07:00	142	94	1	67	1507	15.3139	9.61818	1086	27	21	1	1
kumwang66_현원기	4	2007-11-04	01:09:00	140	96	1	69	1509	13.3113	11.6135	2	-2	2	1	1
kumwang66_현원기	5	2007-11-04	08:59:00	132	87	1	539	1979	4.69321	1.51957	470	-8	-9	0	1
kumwang66_현원기	6	2007-11-04	09:01:00	132	90	1	541	1981	4.69058	4.51492	2	0	3	0	1
kumwang66_현원기	7	2007-11-04	20:30:00	112	69	1	1230	2670	-16.2155	-18.0888	689	-20	-21	0	0
kumwang66_현원기	8	2007-11-04	20:32:00	116	69	1	1232	2672	-12.2181	-18.0934	2	4	0	0	0
kumwang66_현원기	9	2007-11-05	06:01:00	134	91	2	361	3241	5.03361	2.58219	569	18	22	0	1
kumwang66_현원기	10	2007-11-05	06:02:00	130	92	2	362	3242	1.0323	3.57987	1	-4	1	0	1
kumwang66_현원기	11	2007-11-05	21:17:00	183	160	2	1277	4157	52.829	69.4501	915	53	68	1	1
kumwang66_현원기	12	2007-11-05	21:19:00	113	72	2	1279	4159	-17.1736	-18.5545	2	-70	-88	0	0
kumwang66_현원기	13	2007-11-06	06:43:00	120	85	3	403	4723	-10.9153	-6.86725	564	7	13	0	1
kumwang66_현원기	14	2007-11-06	06:45:00	130	84	3	405	4725	-0.917918	-7.8719	2	10	-1	0	0
kumwang66_현원기	15	2007-11-06	19:50:00	116	75	3	1190	5510	-15.9502	-18.699	785	-14	-9	0	0
Result	nx	reading.date	reading.time	sbp	dbp	day	minutes	time	res.sbp	res.dbp	dtime	dsbp	ddbp	sbp.bi	dbp.bi
kumwang67_홍건표	1	2007-10-18	11:43:00	124	84	0	703	703	12.2164	8.84929	NA	NA	NA	0	0
kumwang67_홍건표	2	2007-10-18	11:45:00	113	82	0	705	705	1.21974	6.85044	2	-11	-2	0	0
kumwang67_홍건표	3	2007-10-18	20:05:00	129	72	0	1205	1205	18.0471	-2.86206	500	16	-10	0	0
kumwang67_홍건표	4	2007-10-19	06:17:00	96	69	1	377	1817	-13.9401	-5.51016	612	-33	-3	0	0
kumwang67_홍건표	5	2007-10-19	06:19:00	98	68	1	379	1819	-11.9368	-6.50901	2	2	-1	0	0
kumwang67_홍건표	6	2007-10-19	22:48:00	105	72	1	1368	2808	-3.30024	-1.94034	989	7	4	0	0
kumwang67_홍건표	7	2007-10-19	22:50:00	98	68	1	1370	2810	-10.2969	-5.93919	2	-7	-4	0	0
kumwang67_홍건표	8	2007-10-20	06:20:00	104	76	2	380	3260	-3.55227	2.31957	450	6	8	0	0
kumwang67_홍건표	9	2007-10-20	06:21:00	106	75	2	381	3261	-1.55062	1.32014	1	2	-1	0	0
kumwang67_홍건표	10	2007-10-20	21:03:00	107	68	2	1263	4143	0.908906	-5.17271	882	1	-7	0	0
kumwang67_홍건표	11	2007-10-20	21:04:00	102	69	2	1264	4144	-4.08944	-4.17213	1	-5	1	0	0
kumwang67_홍건표	12	2007-10-21	07:12:00	114	82	3	432	4752	8.91667	9.17747	608	12	13	0	0
kumwang67_홍건표	13	2007-10-21	07:14:00	108	76	3	434	4754	2.91998	3.17862	2	-6	-6	0	0
kumwang67_홍건표	14	2007-10-21	22:12:00	102	69	3	1332	5652	-1.59402	-3.30503	898	-6	-7	0	0
kumwang67_홍건표	15	2007-10-21	22:13:00	105	72	3	1333	5653	1.40764	-0.304454	1	3	3	0	0
kumwang67_홍건표	16	2007-10-22	07:19:00	106	74	4	439	6199	3.31115	2.0095	546	1	2	0	0
kumwang67_홍건표	17	2007-10-22	07:20:00	104	74	4	440	6200	1.31281	2.01007	1	-2	0	0	0
Result	nx	reading.date	reading.time	sbp	dbp	day	minutes	time	res.sbp	res.dbp	dtime	dsbp	ddbp	sbp.bi	dbp.bi
kumwang68_홍성운	1	2007-10-25	21:17:00	106	72	0	1277	1277	-2.97057	-2.47166	NA	NA	NA	0	0
kumwang68_홍성운	2	2007-10-27	09:18:00	112	70	2	558	3438	2.30944	-1.88518	2161	6	-2	0	0
kumwang68_홍성운	3	2007-10-27	09:19:00	106	74	2	559	3439	-3.69089	2.11602	1	-6	4	0	0
kumwang68_홍성운	4	2007-10-29	20:34:00	121	64	4	1234	6994	10.1247	-3.62903	3555	15	-10	0	0
kumwang68_홍성운	5	2007-10-29	20:38:00	117	77	4	1238	6998	6.12334	9.37576	4	-4	13	0	0
kumwang68_홍성운	6	2007-10-30	07:18:00	116	73	5	438	7638	4.91011	6.14177	640	-1	-4	0	0
kumwang68_홍성운	7	2007-10-30	07:19:00	112	71	5	439	7639	0.909774	4.14297	1	-4	-2	0	0
kumwang68_홍성운	8	2007-10-30	20:42:00	106	60	5	1242	8442	-5.35777	-5.89593	803	-6	-11	0	0
kumwang68_홍성운	9	2007-10-30	20:43:00	99	58	5	1243	8443	-12.3581	-7.89473	1	-7	-2	0	0
Result	nx	reading.date	reading.time	sbp	dbp	day	minutes	time	res.sbp	res.dbp	dtime	dsbp	ddbp	sbp.bi	dbp.bi
kumwang69_홍정기	1	2007-11-21	15:47:00	136	78	0	947	947	20.2069	0.805494	NA	NA	NA	1	0
kumwang69_홍정기	2	2007-11-21	15:49:00	124	75	0	949	949	8.20706	-2.19558	2	-12	-3	0	0
kumwang69_홍정기	3	2007-11-22	09:01:00	108	74	1	541	1981	-7.69659	-3.74834	1032	-16	-1	0	0
kumwang69_홍정기	4	2007-11-22	09:03:00	108	77	1	543	1983	-7.69641	-0.749408	2	0	3	0	0
kumwang69_홍정기	5	2007-11-22	23:37:00	111	78	1	1417	2857	-4.61481	-0.217539	874	3	1	0	0
kumwang69_홍정기	6	2007-11-22	23:39:00	109	79	1	1419	2859	-6.61463	0.781389	2	-2	1	0	0
kumwang69_홍정기	7	2007-11-23	07:44:00	110	77	2	464	3344	-5.56935	-1.47839	485	1	-2	0	0
kumwang69_홍정기	8	2007-11-23	07:46:00	103	79	2	466	3346	-12.5692	0.520543	2	-7	2	0	0
kumwang69_홍정기	9	2007-11-23	19:59:00	115	77	2	1199	4079	-0.500731	-1.87207	733	12	-2	0	0
kumwang69_홍정기	10	2007-11-23	20:01:00	120	79	2	1201	4081	4.49946	0.126862	2	5	2	0	0
kumwang69_홍정기	11	2007-11-24	07:32:00	122	84	3	452	4772	6.56396	4.75675	691	2	5	0	0
kumwang69_홍정기	12	2007-11-24	07:34:00	111	83	3	454	4774	-4.43585	3.75568	2	-11	-1	0	0
kumwang69_홍정기	13	2007-11-25	07:33:00	116	81	4	453	6213	0.698491	0.984921	1439	5	-2	0	0
kumwang69_홍정기	14	2007-11-25	07:35:00	112	77	4	455	6215	-3.30132	-3.01615	2	-4	-4	0	0
kumwang69_홍정기	15	2007-11-26	08:03:00	132	86	5	483	7683	16.8357	5.19756	1468	20	9	0	1
kumwang69_홍정기	16	2007-11-26	08:05:00	116	86	5	485	7685	0.835911	5.19649	2	-16	0	0	1
kumwang69_홍정기	17	2007-11-27	08:16:00	117	80	6	496	9136	1.97137	-1.58069	1451	1	-6	0	0
kumwang69_홍정기	18	2007-11-27	08:18:00	112	80	6	498	9138	-3.02844	-1.58177	2	-5	0	0	0
kumwang69_홍정기	19	2007-11-28	07:58:00	114	79	7	478	10558	-0.895876	-3.34235	1420	2	-1	0	0
kumwang69_홍정기	20	2007-11-28	08:00:00	112	80	7	480	10560	-2.89569	-2.34342	2	-2	1	0	0

## Sheet: list_3
Result	nx	reading.date	reading.time	sbp	dbp	day	minutes	time	res.sbp	res.dbp	dtime	dsbp	ddbp	sbp.bi	dbp.bi
dongo01_강문자	1	2007-09-11	21:43:00	158	92	0	1303	1303	-0.404826	-1.46573	NA	NA	NA	1	1
dongo01_강문자	2	2007-09-11	21:50:00	160	93	0	1310	1310	1.59791	-0.465981	7	2	1	1	1
dongo01_강문자	3	2007-09-12	07:29:00	168	93	1	449	1889	9.82428	-0.48645	579	8	0	1	1
dongo01_강문자	4	2007-09-12	07:38:00	161	100	1	458	1898	2.8278	6.51323	9	-7	7	1	1
dongo01_강문자	5	2007-09-12	22:01:00	169	96	1	1321	2761	11.1652	2.48272	863	8	-4	1	1
dongo01_강문자	6	2007-09-12	22:06:00	171	100	1	1326	2766	13.1672	6.48255	5	2	4	1	1
dongo01_강문자	7	2007-09-12	22:10:00	163	101	1	1330	2770	5.16871	7.4824	4	-8	1	1	1
dongo01_강문자	8	2007-09-13	07:15:00	168	97	2	435	3315	10.3818	3.46314	545	5	-4	1	1
dongo01_강문자	9	2007-09-13	07:21:00	164	98	2	441	3321	6.38413	4.46292	6	-4	1	1	1
dongo01_강문자	10	2007-09-13	22:17:00	128	84	2	1337	4217	-29.2656	-9.56875	896	-36	-14	0	0
dongo01_강문자	11	2007-09-13	22:25:00	128	80	2	1345	4225	-29.2624	-13.569	8	0	-4	0	0
dongo01_강문자	12	2007-09-14	07:06:00	173	88	3	426	4746	15.9413	-5.58745	521	45	8	1	1
dongo01_강문자	13	2007-09-14	07:14:00	152	91	3	434	4754	-5.05562	-2.58774	8	-21	3	1	1
dongo01_강문자	14	2007-09-14	22:03:00	132	93	3	1323	5643	-24.7081	-0.619166	889	-20	2	0	1
dongo01_강문자	15	2007-09-14	22:09:00	124	80	3	1329	5649	-32.7057	-13.6194	6	-8	-13	0	0
dongo01_강문자	16	2007-09-15	07:27:00	161	95	4	447	6207	4.51245	1.3609	558	37	15	1	1
dongo01_강문자	17	2007-09-15	07:34:00	148	94	4	454	6214	-8.48481	0.360648	7	-13	-1	1	1
dongo01_강문자	18	2007-09-15	22:19:00	179	100	4	1339	7099	22.8612	6.32936	885	31	6	1	1
dongo01_강문자	19	2007-09-15	22:26:00	161	96	4	1346	7106	4.86393	2.32911	7	-18	-4	1	1
dongo01_강문자	20	2007-09-16	07:25:00	157	92	5	445	7645	1.07465	-1.68994	539	-4	-4	1	1
dongo01_강문자	21	2007-09-16	07:30:00	152	94	5	450	7650	-3.92339	0.309881	5	-5	2	1	1
dongo01_강문자	22	2007-09-16	21:03:00	165	96	5	1263	8463	9.39446	2.28114	813	13	2	1	1
dongo01_강문자	23	2007-09-16	21:08:00	165	89	5	1268	8468	9.39642	-4.71904	5	0	-7	1	1
dongo01_강문자	24	2007-09-17	06:50:00	156	99	6	410	9050	0.623955	5.26039	582	-9	10	1	1
dongo01_강문자	25	2007-09-17	06:53:00	160	99	6	413	9053	4.62513	5.26028	3	4	0	1	1
Result	nx	reading.date	reading.time	sbp	dbp	day	minutes	time	res.sbp	res.dbp	dtime	dsbp	ddbp	sbp.bi	dbp.bi
dongo02_강옥현	1	2007-10-02	19:49:00	70	45	0	1189	1189	-5.86074	-2.93315	NA	NA	NA	0	0
dongo02_강옥현	2	2007-10-12	09:10:00	86	55	10	550	14950	-3.49444	-2.30166	13761	16	10	0	0
dongo02_강옥현	3	2007-10-12	10:07:00	88	56	10	607	15007	-1.55091	-1.34046	57	2	1	0	0
dongo02_강옥현	4	2007-10-12	19:13:00	94	62	10	1153	15553	3.90814	4.28782	546	6	6	0	0
dongo02_강옥현	5	2007-10-12	20:30:00	92	65	10	1230	15630	1.83186	7.2354	77	-2	3	0	0
dongo02_강옥현	6	2007-10-13	08:30:00	92	56	11	510	16350	1.11852	-2.25478	720	0	-9	0	0
dongo02_강옥현	7	2007-10-13	10:02:00	93	57	11	602	16442	2.02737	-1.31741	92	1	1	0	0
dongo02_강옥현	8	2007-10-13	19:26:00	90	59	11	1166	17006	-1.53141	0.298616	564	-3	2	0	0
dongo02_강옥현	9	2007-10-13	20:10:00	106	66	11	1210	17050	14.425	7.26866	44	16	7	0	0
dongo02_강옥현	10	2007-10-14	08:21:00	86	56	12	501	17781	-6.29925	-3.22901	731	-20	-10	0	0
dongo02_강옥현	11	2007-10-14	11:05:00	110	67	12	665	17945	17.5383	7.65934	164	24	11	0	0
dongo02_강옥현	12	2007-10-14	18:49:00	78	54	12	1129	18409	-14.9214	-5.65655	464	-32	-13	0	0
dongo02_강옥현	13	2007-10-14	18:53:00	76	48	12	1133	18413	-16.9254	-11.6593	4	-2	-6	0	0
dongo02_강옥현	14	2007-10-14	18:58:00	89	60	12	1138	18418	-3.93035	0.337325	5	13	12	0	0
dongo02_강옥현	15	2007-10-14	19:57:00	107	70	12	1197	18477	14.0112	10.2972	59	18	10	0	0
dongo02_강옥현	16	2007-10-15	08:01:00	96	54	13	481	19201	2.29389	-6.19574	724	-11	-16	0	0
dongo02_강옥현	17	2007-10-15	10:17:00	102	56	13	617	19337	8.15915	-4.28833	136	6	2	0	0
dongo02_강옥현	18	2007-10-15	18:24:00	90	60	13	1104	19824	-4.32335	-0.619882	487	-12	4	0	0
dongo02_강옥현	19	2007-10-15	20:06:00	112	70	13	1206	19926	17.5756	9.31068	102	22	10	0	0
dongo02_강옥현	20	2007-10-16	09:55:00	97	66	14	595	20755	1.75427	4.74629	829	-15	-4	0	0
dongo02_강옥현	21	2007-10-16	15:09:00	99	63	14	909	21069	3.44317	1.53252	314	2	-3	0	0
dongo02_강옥현	22	2007-10-16	18:59:00	101	64	14	1139	21299	5.2153	2.37594	230	2	1	0	0
dongo02_강옥현	23	2007-10-16	19:41:00	100	64	14	1181	21341	4.17369	2.34734	42	-1	0	0	0
dongo02_강옥현	24	2007-10-17	09:17:00	88	60	15	557	22157	-8.63476	-2.20819	816	-12	-4	0	0
dongo02_강옥현	25	2007-10-17	09:20:00	80	59	15	560	22160	-16.6377	-3.21023	3	-8	-1	0	0
dongo02_강옥현	26	2007-10-17	10:02:00	84	50	15	602	22202	-12.6793	-12.2388	42	4	-9	0	0
dongo02_강옥현	27	2007-10-17	10:09:00	96	64	15	609	22209	-0.686282	1.75641	7	12	14	0	0
Result	nx	reading.date	reading.time	sbp	dbp	day	minutes	time	res.sbp	res.dbp	dtime	dsbp	ddbp	sbp.bi	dbp.bi
dongo03_강유선	1	2007-11-02	18:55:00	122	76	0	1135	1135	13.3979	4.25296	NA	NA	NA	0	0
dongo03_강유선	2	2007-11-02	20:15:00	110	74	0	1215	1215	1.4934	2.33495	80	-12	-2	0	0
dongo03_강유선	3	2007-11-03	06:36:00	100	72	1	396	1836	-7.7653	0.971397	621	-10	-2	0	0
dongo03_강유선	4	2007-11-03	07:27:00	104	62	1	447	1887	-3.70442	-8.97633	51	4	-10	0	0
dongo03_강유선	5	2007-11-03	21:18:00	113	66	1	1278	2718	6.28757	-4.12466	831	9	4	0	0
dongo03_강유선	6	2007-11-03	22:13:00	103	77	1	1333	2773	-3.64678	6.93171	55	-10	11	0	0
dongo03_강유선	7	2007-11-04	06:54:00	102	73	2	414	3294	-4.02485	3.46567	521	-1	-4	0	0
dongo03_강유선	8	2007-11-04	17:15:00	101	66	2	1035	3915	-4.28355	-2.89788	621	-1	-7	0	0
dongo03_강유선	9	2007-11-04	19:25:00	108	65	2	1165	4045	2.87163	-3.76464	130	7	-1	0	0
dongo03_강유선	10	2007-11-04	21:01:00	103	64	2	1261	4141	-2.01377	-4.66625	96	-5	-1	0	0
dongo03_강유선	11	2007-11-05	07:11:00	106	72	3	431	4751	1.7144	3.95892	610	3	8	0	0
dongo03_강유선	12	2007-11-05	07:37:00	97	68	3	457	4777	-7.25456	-0.0144299	26	-9	-4	0	0
dongo03_강유선	13	2007-11-05	19:30:00	100	66	3	1170	5490	-3.40344	-1.28369	713	3	-2	0	0
dongo03_강유선	14	2007-11-05	20:59:00	101	64	3	1259	5579	-2.29719	-3.19248	89	1	-2	0	0
dongo03_강유선	15	2007-11-06	07:16:00	103	64	4	436	6196	0.439332	-2.56012	617	2	0	0	0
dongo03_강유선	16	2007-11-06	08:53:00	111	78	4	533	6293	8.55512	11.5393	97	8	14	0	0
dongo03_강유선	17	2007-11-06	19:12:00	105	68	4	1152	6912	3.29404	2.17369	619	-6	-10	0	0
dongo03_강유선	18	2007-11-07	07:18:00	96	62	5	438	7638	-4.83932	-3.08225	726	-9	-6	0	0
dongo03_강유선	19	2007-11-07	07:34:00	106	64	5	454	7654	5.17978	-1.06585	16	10	2	0	0
Result	nx	reading.date	reading.time	sbp	dbp	day	minutes	time	res.sbp	res.dbp	dtime	dsbp	ddbp	sbp.bi	dbp.bi
dongo04_공기웅	1	2007-09-27	18:14:00	200	111	0	1094	1094	16.0016	2.94026	NA	NA	NA	1	1
dongo04_공기웅	2	2007-09-27	20:09:00	194	112	0	1209	1209	10.101	3.93325	115	-6	1	1	1
dongo04_공기웅	3	2007-09-28	00:28:00	186	112	1	28	1468	2.32489	3.91748	259	-8	0	1	1
dongo04_공기웅	4	2007-09-28	07:18:00	173	105	1	438	1878	-10.3207	-3.1075	410	-13	-7	1	1
dongo04_공기웅	5	2007-09-28	13:19:00	172	98	1	799	2239	-11.0086	-10.1295	361	-1	-7	1	1
dongo04_공기웅	6	2007-09-28	14:04:00	158	96	1	844	2284	-24.9697	-12.1322	45	-14	-2	1	1
dongo04_공기웅	7	2007-09-28	18:40:00	188	109	1	1120	2560	5.26888	0.850967	276	30	13	1	1
dongo04_공기웅	8	2007-09-28	20:56:00	181	106	1	1256	2696	-1.61356	-2.15732	136	-7	-3	1	1
dongo04_공기웅	9	2007-09-28	21:12:00	200	120	1	1272	2712	17.4003	11.8417	16	19	14	1	1
dongo04_공기웅	10	2007-09-28	23:27:00	176	104	1	1407	2847	-6.48302	-4.16651	135	-24	-16	1	1
dongo04_공기웅	11	2007-09-29	08:48:00	156	106	2	528	3408	-25.9981	-2.20068	561	-20	2	1	1
dongo04_공기웅	12	2007-09-29	14:31:00	180	107	2	871	3751	-1.70155	-1.22157	343	24	1	1	1
dongo04_공기웅	13	2007-09-29	15:18:00	182	111	2	918	3798	0.339079	2.77557	47	2	4	1	1
dongo04_공기웅	14	2007-09-29	15:28:00	188	121	2	928	3808	6.34772	12.775	10	6	10	1	1
dongo04_공기웅	15	2007-09-29	23:16:00	174	102	2	1396	4276	-7.24771	-6.25355	468	-14	-19	1	1
dongo04_공기웅	16	2007-09-30	00:00:00	169	96	3	0	4320	-12.2097	-12.2562	44	-5	-6	1	1
dongo04_공기웅	17	2007-09-30	06:33:00	191	125	3	393	4713	10.1301	16.7198	393	22	29	1	1
dongo04_공기웅	18	2007-09-30	06:35:00	192	110	3	395	4715	11.1318	1.71971	2	1	-15	1	1
dongo04_공기웅	19	2007-09-30	07:04:00	195	106	3	424	4744	14.1569	-2.28205	29	3	-4	1	1
dongo04_공기웅	20	2007-09-30	20:06:00	203	112	3	1206	5526	22.8329	3.67032	782	8	6	1	1
dongo04_공기웅	21	2007-10-01	21:24:00	176	109	4	1284	7044	-2.85488	0.577864	1518	-27	-3	1	1
dongo04_공기웅	22	2007-10-01	23:37:00	185	108	4	1417	7177	6.26009	-0.430237	133	9	-1	1	1
dongo04_공기웅	23	2007-10-02	01:41:00	168	102	5	101	7301	-10.6327	-6.43779	124	-17	-6	1	1
dongo04_공기웅	24	2007-10-02	10:40:00	177	111	5	640	7840	-1.16677	2.52938	539	9	9	1	1
dongo04_공기웅	25	2007-10-02	12:11:00	172	107	5	731	7931	-6.08811	-1.47616	91	-5	-4	1	1
Result	nx	reading.date	reading.time	sbp	dbp	day	minutes	time	res.sbp	res.dbp	dtime	dsbp	ddbp	sbp.bi	dbp.bi
dongo05_곽성신	1	2007-11-23	08:19:00	104	70	0	499	499	-10.2967	-2.88696	NA	NA	NA	0	0
dongo05_곽성신	2	2007-11-23	09:13:00	131	87	0	553	553	16.6052	14.0213	54	27	17	0	1
dongo05_곽성신	3	2007-11-23	18:32:00	117	73	0	1112	1112	1.59	-0.928348	559	-14	-14	0	0
dongo05_곽성신	4	2007-11-23	20:59:00	112	69	0	1259	1259	-3.67698	-5.17808	147	-5	-4	0	0
dongo05_곽성신	5	2007-11-24	07:14:00	122	80	1	434	1874	5.20609	4.77713	615	10	11	0	0
dongo05_곽성신	6	2007-11-24	09:48:00	116	75	1	588	2028	-1.07359	-0.48449	154	-6	-5	0	0
dongo05_곽성신	7	2007-11-24	18:06:00	112	68	1	1086	2526	-5.97804	-8.33052	498	-4	-7	0	0
dongo05_곽성신	8	2007-11-24	19:37:00	112	65	1	1177	2617	-6.14331	-11.4851	91	0	-3	0	0
dongo05_곽성신	9	2007-11-25	07:13:00	117	79	2	433	3313	-2.40734	1.33249	696	5	14	0	0
dongo05_곽성신	10	2007-11-25	08:58:00	124	77	2	538	3418	4.40196	-0.845885	105	7	-2	0	0
dongo05_곽성신	11	2007-11-25	19:34:00	123	84	2	1174	4054	2.24689	5.07365	636	-1	7	0	0
dongo05_곽성신	12	2007-11-25	21:22:00	112	77	2	1282	4162	-8.94925	-2.10983	108	-11	-7	0	0
dongo05_곽성신	13	2007-11-26	07:20:00	125	80	3	440	4760	2.96469	-0.125734	598	13	3	0	0
dongo05_곽성신	14	2007-11-26	08:54:00	127	82	3	534	4854	4.79397	1.71457	94	2	2	0	0
dongo05_곽성신	15	2007-11-26	18:30:00	117	82	3	1110	5430	-6.25213	0.736039	576	-10	0	0	0
dongo05_곽성신	16	2007-11-26	21:06:00	119	84	3	1266	5586	-4.53545	2.47102	156	2	2	0	0
dongo05_곽성신	17	2007-11-27	07:06:00	128	84	4	426	6186	3.37486	1.45171	600	9	0	0	0
dongo05_곽성신	18	2007-11-27	08:38:00	124	80	4	518	6278	-0.792221	-2.70458	92	-4	-4	0	0
dongo05_곽성신	19	2007-11-27	18:19:00	136	89	4	1099	6859	10.1526	5.30839	581	12	9	1	1
dongo05_곽성신	20	2007-11-27	21:18:00	130	88	4	1278	7038	3.82751	4.0043	179	-6	-1	0	1
dongo05_곽성신	21	2007-11-28	07:19:00	120	83	5	439	7639	-7.264	-2.01671	601	-10	-5	0	0
dongo05_곽성신	22	2007-11-28	09:14:00	136	88	5	554	7754	8.52715	2.78792	115	16	5	1	1
dongo05_곽성신	23	2007-11-28	18:21:00	129	83	5	1101	8301	0.533712	-3.14134	547	-7	-5	0	0
dongo05_곽성신	24	2007-11-29	07:06:00	123	84	6	426	9066	-6.85564	-3.44096	765	-6	1	0	0
Result	nx	reading.date	reading.time	sbp	dbp	day	minutes	time	res.sbp	res.dbp	dtime	dsbp	ddbp	sbp.bi	dbp.bi
dongo06_권상숙	1	2007-09-17	22:47:00	116	70	0	1367	1367	0.69994	-1.15777	NA	NA	NA	0	0
dongo06_권상숙	2	2007-09-17	22:50:00	104	67	0	1370	1370	-11.2951	-4.15405	3	-12	-3	0	0
dongo06_권상숙	3	2007-09-18	08:24:00	114	72	1	504	1944	-0.345492	1.55734	574	10	5	0	0
dongo06_권상숙	4	2007-09-18	08:25:00	115	76	1	505	1945	0.656162	5.55857	1	1	4	0	0
dongo06_권상숙	5	2007-09-18	21:11:00	108	58	1	1271	2711	-5.0766	-11.4921	766	-7	-18	0	0
dongo06_권상숙	6	2007-09-18	21:14:00	116	64	1	1274	2714	2.92837	-5.48837	3	8	6	0	0
dongo06_권상숙	7	2007-09-19	08:25:00	127	78	2	505	3385	15.0384	9.34324	671	11	14	0	0
dongo06_권상숙	8	2007-09-19	08:26:00	115	80	2	506	3386	3.0401	11.3445	1	-12	2	0	0
dongo06_권상숙	9	2007-09-19	21:24:00	113	68	2	1284	4164	2.3272	0.308691	778	-2	-12	0	0
dongo06_권상숙	10	2007-09-19	21:25:00	112	61	2	1285	4165	1.32885	-6.69007	1	-1	-7	0	0
dongo06_권상숙	11	2007-09-20	07:58:00	112	72	3	478	4798	2.37606	5.09444	633	0	11	0	0
dongo06_권상숙	12	2007-09-20	07:59:00	111	71	3	479	4799	1.37772	4.09568	1	-1	-1	0	0
dongo06_권상숙	13	2007-09-20	21:50:00	108	70	3	1310	5630	-0.247507	4.12558	831	-3	-1	0	0
dongo06_권상숙	14	2007-09-20	21:51:00	96	54	3	1311	5631	-12.2459	-11.8732	1	-12	-16	0	0
dongo06_권상숙	15	2007-09-22	08:54:00	104	66	5	534	7734	-0.766725	2.73317	2103	8	12	0	0
dongo06_권상숙	16	2007-09-22	08:56:00	104	63	5	536	7736	-0.763416	-0.264353	2	0	-3	0	0
dongo06_권상숙	17	2007-09-22	08:57:00	105	60	5	537	7737	0.238238	-3.26311	1	1	-3	0	0
dongo06_권상숙	18	2007-09-22	08:59:00	114	66	5	539	7739	9.24155	2.73936	2	9	6	0	0
dongo06_권상숙	19	2007-09-22	09:00:00	100	64	5	540	7740	-4.7568	0.740604	1	-14	-2	0	0
dongo06_권상숙	20	2007-09-22	09:01:00	101	60	5	541	7741	-3.75514	-3.25816	1	1	-4	0	0
Result	nx	reading.date	reading.time	sbp	dbp	day	minutes	time	res.sbp	res.dbp	dtime	dsbp	ddbp	sbp.bi	dbp.bi
dongo07_김근	1	2007-09-27	17:59:00	115	72	0	1079	1079	-10.0448	0.110821	NA	NA	NA	0	0
dongo07_김근	2	2007-09-28	05:35:00	130	82	1	335	1775	6.86562	11.1373	696	15	10	0	0
dongo07_김근	3	2007-09-28	05:36:00	140	80	1	336	1776	16.8684	9.1388	1	10	-2	1	0
dongo07_김근	4	2007-09-28	05:38:00	130	78	1	338	1778	6.87386	7.14175	2	-10	-2	0	0
dongo07_김근	5	2007-09-28	13:44:00	135	77	1	824	2264	13.2078	6.85854	486	5	-1	1	0
dongo07_김근	6	2007-09-28	13:46:00	115	57	1	826	2266	-6.78668	-13.1385	2	-20	-20	0	0
dongo07_김근	7	2007-09-29	07:09:00	105	62	2	429	3309	-13.9239	-6.60023	1043	-10	5	0	0
dongo07_김근	8	2007-09-29	07:10:00	105	52	2	430	3310	-13.9211	-16.5988	1	0	-10	0	0
dongo07_김근	9	2007-09-29	16:36:00	129	80	2	996	3876	11.6324	12.236	566	24	28	0	0
dongo07_김근	10	2007-09-29	16:38:00	119	76	2	998	3878	1.63793	8.23897	2	-10	-4	0	0
dongo07_김근	11	2007-09-30	06:59:00	106	56	3	419	4739	-8.99881	-10.4912	861	-13	-20	0	0
dongo07_김근	12	2007-09-30	07:01:00	104	56	3	421	4741	-10.9933	-10.4882	2	-2	0	0	0
dongo07_김근	13	2007-09-30	17:03:00	114	52	3	1023	5343	0.65905	-13.6004	602	10	-4	0	0
dongo07_김근	14	2007-09-30	17:04:00	112	56	3	1024	5344	-1.33821	-9.59888	1	-2	4	0	0
dongo07_김근	15	2007-10-01	07:05:00	93	52	4	425	6185	-18.0298	-12.3585	841	-19	-4	0	0
dongo07_김근	16	2007-10-01	07:06:00	109	68	4	426	6186	-2.02709	3.64296	1	16	16	0	0
dongo07_김근	17	2007-10-01	07:08:00	112	70	4	428	6188	0.978401	5.64591	2	3	2	0	0
dongo07_김근	18	2007-10-01	16:47:00	111	70	4	1007	6767	1.56764	6.49986	579	-1	0	0	0
dongo07_김근	19	2007-10-01	16:48:00	120	74	4	1008	6768	10.5704	10.5013	1	9	4	0	0
dongo07_김근	20	2007-10-02	08:09:00	113	68	5	489	7689	6.09834	5.85969	921	-7	-6	0	0
dongo07_김근	21	2007-10-02	08:11:00	116	68	5	491	7691	9.10383	5.86264	2	3	0	0	0
Result	nx	reading.date	reading.time	sbp	dbp	day	minutes	time	res.sbp	res.dbp	dtime	dsbp	ddbp	sbp.bi	dbp.bi
dongo08_김금순	1	2007-10-11	00:20:00	136	94	0	20	20	11.3529	19.6864	NA	NA	NA	1	1
dongo08_김금순	2	2007-10-11	08:03:00	129	106	0	483	483	3.61693	30.7871	463	-7	12	0	1
dongo08_김금순	3	2007-10-11	18:44:00	142	81	0	1124	1124	15.598	4.54216	641	13	-25	1	0
dongo08_김금순	4	2007-10-11	22:19:00	115	72	0	1339	1339	-11.7437	-4.87543	215	-27	-9	0	0
dongo08_김금순	5	2007-10-13	06:53:00	119	55	2	413	3293	-10.8497	-25.6706	1954	4	-17	0	0
dongo08_김금순	6	2007-10-13	19:54:00	123	75	2	1194	4074	-8.09108	-7.18748	781	4	20	0	0
dongo08_김금순	7	2007-10-13	19:57:00	111	73	2	1197	4077	-20.0959	-9.19331	3	-12	-2	0	0
dongo08_김금순	8	2007-10-13	19:58:00	104	70	2	1198	4078	-27.0974	-12.1953	1	-7	-3	0	0
dongo08_김금순	9	2007-10-13	20:47:00	125	74	2	1247	4127	-6.17533	-8.29042	49	21	4	0	0
dongo08_김금순	10	2007-10-13	20:49:00	137	68	2	1249	4129	5.82149	-14.2943	2	12	-6	1	0
dongo08_김금순	11	2007-10-13	20:50:00	147	60	2	1250	4130	15.8199	-22.2963	1	10	-8	1	0
dongo08_김금순	12	2007-10-13	21:07:00	118	62	2	1267	4147	-13.2071	-20.3293	17	-29	2	0	0
dongo08_김금순	13	2007-10-13	21:09:00	132	62	2	1269	4149	0.7897	-20.3332	2	14	0	0	0
dongo08_김금순	14	2007-10-14	20:17:00	117	75	3	1217	5537	-16.4166	-10.029	1388	-15	13	0	0
dongo08_김금순	15	2007-10-15	07:05:00	239	208	4	425	6185	104.553	121.712	648	122	133	1	1
dongo08_김금순	16	2007-10-15	22:04:00	92	66	4	1324	7084	-43.8756	-22.0337	899	-147	-142	0	0
Result	nx	reading.date	reading.time	sbp	dbp	day	minutes	time	res.sbp	res.dbp	dtime	dsbp	ddbp	sbp.bi	dbp.bi
dongo09_김명자	1	2007-10-18	22:02:00	98	66	0	1322	1322	0	0	NA	NA	NA	0	0
dongo09_김명자	2	2007-10-19	19:54:00	112	68	1	1194	2634	0	0	1312	14	2	0	0
Result	nx	reading.date	reading.time	sbp	dbp	day	minutes	time	res.sbp	res.dbp	dtime	dsbp	ddbp	sbp.bi	dbp.bi
dongo10_김미화	1	2007-09-27	18:18:00	124	64	0	1098	1098	10.2313	-0.156745	NA	NA	NA	0	0
dongo10_김미화	2	2007-09-27	20:43:00	115	56	0	1243	1243	1.2063	-8.21673	145	-9	-8	0	0
dongo10_김미화	3	2007-09-28	06:39:00	112	67	1	399	1839	-1.89657	2.53673	596	-3	11	0	0
dongo10_김미화	4	2007-09-28	10:05:00	111	64	1	605	2045	-2.93212	-0.548489	206	-1	-3	0	0
dongo10_김미화	5	2007-09-28	17:44:00	108	60	1	1064	2504	-6.01135	-4.73836	459	-3	-4	0	0
dongo10_김미화	6	2007-09-28	21:38:00	109	68	1	1298	2738	-5.05174	3.16484	234	1	8	0	0
dongo10_김미화	7	2007-09-29	07:31:00	111	67	2	451	3331	-3.15409	1.91953	593	2	-1	0	0
dongo10_김미화	8	2007-09-29	10:48:00	112	66	2	648	3528	-2.18809	0.838041	197	1	-1	0	0
dongo10_김미화	9	2007-09-29	19:08:00	112	70	2	1148	4028	-2.27439	4.63121	500	0	4	0	0
dongo10_김미화	10	2007-09-29	22:04:00	116	69	2	1324	4204	1.69523	3.5584	176	4	-1	0	0
dongo10_김미화	11	2007-09-30	05:49:00	107	64	3	349	4669	-7.38503	-1.63395	465	-9	-5	0	0
dongo10_김미화	12	2007-09-30	12:17:00	135	75	3	737	5057	20.548	9.20554	388	28	11	1	0
dongo10_김미화	13	2007-09-30	18:49:00	122	67	3	1129	5449	7.48034	1.04338	392	-13	-8	0	0
dongo10_김미화	14	2007-09-30	20:35:00	108	61	3	1235	5555	-6.53795	-5.00046	106	-14	-6	0	0
dongo10_김미화	15	2007-10-01	05:56:00	109	65	4	356	6116	-5.63478	-1.23253	561	1	4	0	0
dongo10_김미화	16	2007-10-01	09:02:00	120	65	4	542	6302	5.33311	-1.30947	186	11	0	0	0
dongo10_김미화	17	2007-10-01	21:53:00	120	70	4	1313	7073	5.20004	3.37159	771	0	5	0	0
dongo10_김미화	18	2007-10-01	22:37:00	115	67	4	1357	7117	0.192441	0.353386	44	-5	-3	0	0
dongo10_김미화	19	2007-10-02	06:21:00	100	64	5	381	7581	-14.8876	-2.83856	464	-15	-3	0	0
dongo10_김미화	20	2007-10-02	10:44:00	121	62	5	644	7844	6.06696	-4.94735	263	21	-2	0	0
Result	nx	reading.date	reading.time	sbp	dbp	day	minutes	time	res.sbp	res.dbp	dtime	dsbp	ddbp	sbp.bi	dbp.bi
dongo11_김소영	1	2007-09-10	18:26:00	96	69	0	1106	1106	5.39894	9.2879	NA	NA	NA	0	0
dongo11_김소영	2	2007-09-10	22:16:00	85	57	0	1336	1336	-5.65223	-2.76935	230	-11	-12	0	0
dongo11_김소영	3	2007-09-11	07:05:00	90	56	1	425	1865	-0.769912	-3.90101	529	5	-1	0	0
dongo11_김소영	4	2007-09-11	09:57:00	92	54	1	597	2037	1.19182	-5.94382	172	2	-2	0	0
dongo11_김소영	5	2007-09-11	19:07:00	94	59	1	1147	2587	3.06947	-1.0807	550	2	5	0	0
dongo11_김소영	6	2007-09-11	22:02:00	91	59	1	1322	2762	0.0305409	-1.12426	175	-3	0	0	0
dongo11_김소영	7	2007-09-12	07:10:00	84	65	2	430	3310	-7.09137	4.73935	548	-7	6	0	0
dongo11_김소영	8	2007-09-12	09:41:00	88	60	2	581	3461	-3.12496	-0.298228	151	4	-5	0	0
dongo11_김소영	9	2007-09-12	19:35:00	96	63	2	1175	4055	4.7429	2.55393	594	8	3	0	0
dongo11_김소영	10	2007-09-12	22:09:00	92	59	2	1329	4209	0.708641	-1.48439	154	-4	-4	0	0
dongo11_김소영	11	2007-09-13	07:23:00	87	62	3	443	4763	-4.4146	1.37772	554	-5	3	0	0
dongo11_김소영	12	2007-09-13	13:09:00	106	61	3	789	5109	14.5084	0.29161	346	19	-1	0	0
dongo11_김소영	13	2007-09-13	18:31:00	88	60	3	1111	5431	-3.56321	-0.788532	322	-18	-1	0	0
dongo11_김소영	14	2007-09-13	21:47:00	85	58	3	1307	5627	-6.60681	-2.83731	196	-3	-2	0	0
dongo11_김소영	15	2007-09-14	06:57:00	85	56	4	417	6177	-6.72916	-4.9742	550	0	-2	0	0
dongo11_김소영	16	2007-09-14	12:07:00	99	66	4	727	6487	7.20188	4.94865	310	14	10	0	0
dongo11_김소영	17	2007-09-14	15:02:00	98	64	4	902	6662	6.16295	2.90509	175	-1	-2	0	0
dongo11_김소영	18	2007-09-14	22:04:00	91	64	4	1324	7084	-0.930933	2.80006	422	-7	0	0	0
dongo11_김소영	19	2007-09-15	07:12:00	88	59	5	432	7632	-4.05284	-2.33633	548	-3	-5	0	0
dongo11_김소영	20	2007-09-15	09:12:00	92	60	5	552	7752	-0.0795368	-1.36619	120	4	1	0	0
Result	nx	reading.date	reading.time	sbp	dbp	day	minutes	time	res.sbp	res.dbp	dtime	dsbp	ddbp	sbp.bi	dbp.bi
dongo12_김양우	1	2007-10-16	19:27:00	112	72	0	1167	1167	15.0834	6.88487	NA	NA	NA	0	0
dongo12_김양우	2	2007-10-16	23:10:00	103	68	0	1390	1390	6.03813	2.86503	223	-9	-4	0	0
dongo12_김양우	3	2007-10-16	23:12:00	96	68	0	1392	1392	-0.962273	2.86486	2	-7	0	0	0
dongo12_김양우	4	2007-10-16	23:13:00	102	72	0	1393	1393	5.03752	6.86477	1	6	4	0	0
dongo12_김양우	5	2007-10-16	23:14:00	100	68	0	1394	1394	3.03732	2.86468	1	-2	-4	0	0
dongo12_김양우	6	2007-10-16	23:15:00	104	68	0	1395	1395	7.03712	2.86459	1	4	0	0	0
dongo12_김양우	7	2007-10-17	07:10:00	84	60	1	430	1870	-13.0594	-5.17766	475	-20	-8	0	0
dongo12_김양우	8	2007-10-17	07:11:00	89	63	1	431	1871	-8.0596	-2.17775	1	5	3	0	0
dongo12_김양우	9	2007-10-17	07:12:00	91	60	1	432	1872	-6.05981	-5.17784	1	2	-3	0	0
dongo12_김양우	10	2007-10-17	21:39:00	101	64	1	1299	2739	3.76402	-1.25496	867	10	4	0	0
dongo12_김양우	11	2007-10-17	21:40:00	100	65	1	1300	2740	2.76382	-0.255045	1	-1	1	0	0
dongo12_김양우	12	2007-10-17	23:06:00	103	70	1	1386	2826	5.74634	4.73731	86	3	5	0	0
dongo12_김양우	13	2007-10-17	23:07:00	106	73	1	1387	2827	8.74614	7.73722	1	3	3	0	0
dongo12_김양우	14	2007-10-17	23:08:00	103	69	1	1388	2828	5.74594	3.73713	1	-3	-4	0	0
dongo12_김양우	15	2007-10-18	06:59:00	88	55	2	419	3299	-9.34977	-10.3048	471	-15	-14	0	0
dongo12_김양우	16	2007-10-18	07:00:00	93	64	2	420	3300	-4.34997	-1.30486	1	5	9	0	0
dongo12_김양우	17	2007-10-18	07:00:00	91	64	2	420	3300	-6.34997	-1.30486	0	-2	0	0	0
dongo12_김양우	18	2007-10-18	07:01:00	90	64	2	421	3301	-7.35017	-1.30494	1	-1	0	0	0
dongo12_김양우	19	2007-10-18	21:06:00	108	71	2	1266	4146	10.4781	5.61989	845	18	7	0	0
dongo12_김양우	20	2007-10-18	21:07:00	92	61	2	1267	4147	-5.52208	-4.38019	1	-16	-10	0	0
dongo12_김양우	21	2007-10-18	21:07:00	92	61	2	1267	4147	-5.52208	-4.38019	0	0	0	0	0
dongo12_김양우	22	2007-10-18	21:08:00	90	53	2	1268	4148	-7.52228	-12.3803	1	-2	-8	0	0
dongo12_김양우	23	2007-10-18	21:10:00	100	64	2	1270	4150	2.47731	-1.38046	2	10	11	0	0
dongo12_김양우	24	2007-10-18	21:11:00	99	65	2	1271	4151	1.47711	-0.38055	1	-1	1	0	0
dongo12_김양우	25	2007-10-18	23:13:00	96	64	2	1393	4273	-1.54768	-1.3914	122	-3	-1	0	0
dongo12_김양우	26	2007-10-18	23:14:00	93	63	2	1394	4274	-4.54788	-2.39149	1	-3	-1	0	0
dongo12_김양우	27	2007-10-18	23:15:00	93	62	2	1395	4275	-4.54809	-3.39158	1	0	-1	0	0
dongo12_김양우	28	2007-10-19	06:31:00	96	69	3	391	4711	-1.63668	3.56964	436	3	7	0	0
dongo12_김양우	29	2007-10-19	06:32:00	92	66	3	392	4712	-5.63688	0.56955	1	-4	-3	0	0
dongo12_김양우	30	2007-10-19	17:58:00	98	66	3	1078	5398	0.223724	0.508533	686	6	0	0	0
dongo12_김양우	31	2007-10-19	17:59:00	99	58	3	1079	5399	1.22352	-7.49156	1	1	-8	0	0
dongo12_김양우	32	2007-10-19	21:01:00	94	65	3	1261	5581	-3.81346	-0.507745	182	-5	7	0	0
dongo12_김양우	33	2007-10-19	23:11:00	94	58	3	1391	5711	-3.83988	-7.51931	130	0	-7	0	0
dongo12_김양우	34	2007-10-20	07:03:00	90	67	4	423	6183	-7.93578	1.43871	472	-4	9	0	0
dongo12_김양우	35	2007-10-20	16:00:00	112	68	4	960	6720	13.9551	2.39094	537	22	1	0	0
dongo12_김양우	36	2007-10-20	16:01:00	103	68	4	961	6721	4.9549	2.39086	1	-9	0	0	0
dongo12_김양우	37	2007-10-20	16:02:00	104	68	4	962	6722	5.95469	2.39077	1	1	0	0	0
dongo12_김양우	38	2007-10-20	23:30:00	91	66	4	1410	7170	-7.13634	0.350918	448	-13	-2	0	0
dongo12_김양우	39	2007-10-21	07:26:00	100	72	5	446	7646	1.76694	6.30858	476	9	6	0	0
dongo12_김양우	40	2007-10-21	07:28:00	96	67	5	448	7648	-2.23347	1.3084	2	-4	-5	0	0
dongo12_김양우	41	2007-10-21	09:57:00	107	69	5	597	7797	8.73626	3.29515	149	11	2	0	0
dongo12_김양우	42	2007-10-21	09:58:00	101	68	5	598	7798	2.73605	2.29506	1	-6	-1	0	0
Result	nx	reading.date	reading.time	sbp	dbp	day	minutes	time	res.sbp	res.dbp	dtime	dsbp	ddbp	sbp.bi	dbp.bi
dongo13_김영숙	1	2007-09-11	06:06:00	102	71	0	366	366	-4.08686	0.91722	NA	NA	NA	0	0
dongo13_김영숙	2	2007-09-11	06:30:00	110	72	0	390	390	3.91888	1.92343	24	8	1	0	0
dongo13_김영숙	3	2007-09-11	17:22:00	108	72	0	1042	1042	2.07466	2.09205	652	-2	0	0	0
dongo13_김영숙	4	2007-09-11	23:06:00	108	75	0	1386	1386	2.15685	5.18101	344	0	3	0	0
dongo13_김영숙	5	2007-09-12	06:07:00	104	64	1	367	1807	-1.74255	-5.71011	421	-4	-11	0	0
dongo13_김영숙	6	2007-09-12	06:35:00	104	71	1	395	1835	-1.73586	1.29714	28	0	7	0	0
dongo13_김영숙	7	2007-09-12	16:18:00	112	66	1	978	2418	6.40343	-3.55209	583	8	-5	0	0
dongo13_김영숙	8	2007-09-12	22:57:00	104	74	1	1377	2817	-1.50123	4.5511	399	-8	8	0	0
dongo13_김영숙	9	2007-09-13	06:07:00	104	76	2	367	3247	-1.39849	6.66231	430	0	2	0	0
dongo13_김영숙	10	2007-09-13	06:26:00	110	67	2	386	3266	4.60605	-2.33278	19	6	-9	0	0
dongo13_김영숙	11	2007-09-13	16:13:00	96	64	2	973	3853	-9.2537	-5.18097	587	-14	-3	0	0
dongo13_김영숙	12	2007-09-13	23:43:00	103	66	2	1423	4303	-2.14618	-3.06459	450	7	2	0	0
dongo13_김영숙	13	2007-09-14	06:07:00	104	65	3	367	4687	-1.05442	-3.96528	384	1	-1	0	0
dongo13_김영숙	14	2007-09-14	06:30:00	105	68	3	390	4710	-0.0489294	-0.959328	23	1	3	0	0
dongo13_김영숙	15	2007-09-14	16:17:00	112	69	3	977	5297	7.09132	0.192483	587	7	1	0	0
dongo13_김영숙	16	2007-09-14	22:37:00	100	65	3	1357	5677	-4.81788	-3.70924	380	-12	-4	0	0
dongo13_김영숙	17	2007-09-15	06:10:00	104	68	4	370	6130	-0.709643	-0.592086	453	4	3	0	0
dongo13_김영숙	18	2007-09-15	06:24:00	103	60	4	384	6144	-1.7063	-8.58846	14	-1	-8	0	0
dongo13_김영숙	19	2007-09-15	16:38:00	104	73	4	998	6758	-0.559592	4.57033	614	1	13	0	0
dongo13_김영숙	20	2007-09-15	23:04:00	114	73	4	1384	7144	9.53264	4.67016	386	10	0	0	0
dongo13_김영숙	21	2007-09-16	07:51:00	97	69	5	471	7671	-7.34145	0.80645	527	-17	-4	0	0
dongo13_김영숙	22	2007-09-16	07:55:00	96	67	5	475	7675	-8.34049	-1.19252	4	-1	-2	0	0
dongo13_김영숙	23	2007-09-16	16:11:00	108	70	5	971	8171	3.77802	1.93576	496	12	3	0	0
dongo13_김영숙	24	2007-09-16	23:25:00	111	72	5	1405	8605	6.88172	4.048	434	3	2	0	0
Result	nx	reading.date	reading.time	sbp	dbp	day	minutes	time	res.sbp	res.dbp	dtime	dsbp	ddbp	sbp.bi	dbp.bi
dongo14_김영일	1	2007-09-17	16:29:00	142	89	0	989	989	11.8486	13.2976	NA	NA	NA	1	1
dongo14_김영일	2	2007-09-18	00:03:00	116	66	1	3	1443	-14.0486	-10.1538	454	-26	-23	0	0
dongo14_김영일	3	2007-09-18	00:05:00	112	64	1	5	1445	-18.0481	-12.1558	2	-4	-2	0	0
dongo14_김영일	4	2007-09-18	00:06:00	105	64	1	6	1446	-25.0479	-12.1568	1	-7	0	0	0
dongo14_김영일	5	2007-09-18	10:21:00	148	84	1	621	2061	18.0914	7.23172	615	43	20	1	0
dongo14_김영일	6	2007-09-18	10:24:00	136	82	1	624	2064	6.09206	5.22874	3	-12	-2	1	0
dongo14_김영일	7	2007-09-18	21:09:00	140	80	1	1269	2709	10.2381	2.58743	645	4	-2	1	0
dongo14_김영일	8	2007-09-18	21:13:00	136	76	1	1273	2713	6.23905	-1.41654	4	-4	-4	1	0
dongo14_김영일	9	2007-09-19	06:05:00	144	88	2	365	3245	14.3595	10.0545	532	8	12	1	1
dongo14_김영일	10	2007-09-19	06:14:00	133	84	2	374	3254	3.36157	6.04556	9	-11	-4	0	0
dongo14_김영일	11	2007-09-19	21:10:00	130	81	2	1270	4150	0.5645	2.1547	896	-3	-3	0	0
dongo14_김영일	12	2007-09-19	21:12:00	126	78	2	1272	4152	-3.43505	-0.847292	2	-4	-3	0	0
dongo14_김영일	13	2007-09-20	06:39:00	136	88	3	399	4719	6.69337	8.58896	567	10	10	1	1
dongo14_김영일	14	2007-09-20	06:43:00	140	88	3	403	4723	10.6943	8.58498	4	4	0	1	1
dongo14_김영일	15	2007-09-20	21:30:00	119	68	3	1290	5610	-10.1048	-12.2969	887	-21	-20	0	0
dongo14_김영일	16	2007-09-20	21:32:00	123	65	3	1292	5612	-6.10439	-15.2989	2	4	-3	0	0
dongo14_김영일	17	2007-09-20	21:53:00	115	64	3	1313	5633	-14.0996	-16.3198	21	-8	-1	0	0
dongo14_김영일	18	2007-09-21	06:32:00	130	88	4	392	6152	1.01791	7.16418	519	15	24	0	1
dongo14_김영일	19	2007-09-21	06:35:00	129	82	4	395	6155	0.0185914	1.16119	3	-1	-6	0	0
dongo14_김영일	20	2007-09-22	05:49:00	128	87	5	349	7549	-0.665696	4.77519	1394	-1	5	0	1
dongo14_김영일	21	2007-09-22	05:53:00	131	86	5	353	7553	2.33521	3.77121	4	3	-1	0	1
Result	nx	reading.date	reading.time	sbp	dbp	day	minutes	time	res.sbp	res.dbp	dtime	dsbp	ddbp	sbp.bi	dbp.bi
dongo15_김오복	1	2007-09-17	21:49:00	124	65	0	1309	1309	13.0344	3.64636	NA	NA	NA	0	0
dongo15_김오복	2	2007-09-18	01:33:00	125	63	1	93	1533	13.8013	1.39913	224	1	-2	0	0
dongo15_김오복	3	2007-09-18	01:35:00	115	59	1	95	1535	3.79921	-2.60308	2	-10	-4	0	0
dongo15_김오복	4	2007-09-18	07:36:00	108	62	1	456	1896	-3.57642	-0.00151702	361	-7	3	0	0
dongo15_김오복	5	2007-09-18	07:37:00	108	64	1	457	1897	-3.57746	1.99738	1	0	2	0	0
dongo15_김오복	6	2007-09-18	07:38:00	102	67	1	458	1898	-9.5785	4.99628	1	-6	3	0	0
dongo15_김오복	7	2007-09-18	07:53:00	104	58	1	473	1913	-7.59411	-4.02028	15	2	-9	0	0
dongo15_김오복	8	2007-09-18	09:27:00	102	59	1	567	2007	-9.69192	-3.12403	94	-2	1	0	0
dongo15_김오복	9	2007-09-18	22:36:00	115	65	1	1356	2796	2.48711	2.00515	789	13	6	0	0
dongo15_김오복	10	2007-09-19	05:00:00	110	64	2	300	3180	-2.91245	0.581326	384	-5	-1	0	0
dongo15_김오복	11	2007-09-19	08:35:00	114	64	2	515	3395	0.863833	0.34403	215	4	0	0	0
dongo15_김오복	12	2007-09-19	22:36:00	121	68	2	1356	4236	6.98875	3.41581	841	7	4	0	0
dongo15_김오복	13	2007-09-20	02:21:00	108	63	3	141	4461	-6.24537	-1.83252	225	-13	-5	0	0
dongo15_김오복	14	2007-09-20	02:23:00	107	62	3	143	4463	-7.24745	-2.83473	2	-1	-1	0	0
dongo15_김오복	15	2007-09-20	09:05:00	120	68	3	545	4865	5.33426	2.72158	402	13	6	0	0
dongo15_김오복	16	2007-09-20	18:09:00	132	66	3	1089	5409	16.7682	0.121169	544	12	-2	0	0
dongo15_김오복	17	2007-09-20	18:10:00	118	71	3	1090	5410	2.76717	5.12007	1	-14	5	0	0
dongo15_김오복	18	2007-09-20	23:17:00	108	58	3	1397	5717	-7.55227	-8.21877	307	-10	-13	0	0
dongo15_김오복	19	2007-09-20	23:18:00	102	56	3	1398	5718	-13.5533	-10.2199	1	-6	-2	0	0
dongo15_김오복	20	2007-09-21	01:15:00	107	56	4	75	5835	-8.67505	-10.349	117	5	0	0	0
dongo15_김오복	21	2007-09-21	05:48:00	108	63	4	348	6108	-7.95912	-3.65032	273	1	7	0	0
dongo15_김오복	22	2007-09-21	09:48:00	134	76	4	588	6348	17.7912	9.08479	240	26	13	0	0
dongo15_김오복	23	2007-09-21	22:33:00	126	72	4	1353	7113	8.99516	4.24046	765	-8	-4	0	0
dongo15_김오복	24	2007-09-22	01:43:00	124	72	5	103	7303	6.79746	4.03075	190	-2	0	0	0
dongo15_김오복	25	2007-09-22	07:59:00	108	64	5	479	7679	-9.59378	-4.38424	376	-16	-8	0	0
dongo15_김오복	26	2007-09-22	09:13:00	116	76	5	553	7753	-1.67078	7.53409	74	8	12	0	0
Result	nx	reading.date	reading.time	sbp	dbp	day	minutes	time	res.sbp	res.dbp	dtime	dsbp	ddbp	sbp.bi	dbp.bi
dongo16_김정분	1	2007-09-10	17:20:00	111	61	0	1040	1040	2.95436	-0.0906019	NA	NA	NA	0	0
dongo16_김정분	2	2007-09-10	22:00:00	108	63	0	1320	1320	-0.045631	2.03659	280	-3	2	0	0
dongo16_김정분	3	2007-09-11	05:21:00	98	55	1	321	1761	-10.0456	-5.76308	441	-10	-8	0	0
dongo16_김정분	4	2007-09-11	07:56:00	108	59	1	476	1916	-0.0456035	-1.69267	155	10	4	0	0
dongo16_김정분	5	2007-09-11	17:59:00	116	57	1	1079	2519	7.95442	-3.41875	603	8	-2	0	0
dongo16_김정분	6	2007-09-11	22:43:00	102	68	1	1363	2803	-6.04556	7.71027	284	-14	11	0	0
dongo16_김정분	7	2007-09-12	05:16:00	104	51	2	316	3196	-4.04554	-9.11121	393	2	-17	0	0
dongo16_김정분	8	2007-09-12	07:41:00	107	60	2	461	3341	-1.04554	-0.0453403	145	3	9	0	0
dongo16_김정분	9	2007-09-12	16:49:00	108	56	2	1009	3889	-0.0455124	-3.7964	548	1	-4	0	0
dongo16_김정분	10	2007-09-13	06:19:00	121	72	3	379	4699	12.9545	12.5716	810	13	16	0	0
dongo16_김정분	11	2007-09-13	07:52:00	111	72	3	472	4792	2.95453	12.6138	93	-10	0	0	0
dongo16_김정분	12	2007-09-13	19:19:00	111	59	3	1159	5479	2.95456	-0.0741238	687	0	-13	0	0
dongo16_김정분	13	2007-09-14	00:12:00	113	66	4	12	5772	4.95457	7.05898	293	2	7	0	0
dongo16_김정분	14	2007-09-14	06:23:00	98	36	4	383	6143	-10.0454	-22.7725	371	-15	-30	0	0
dongo16_김정분	15	2007-09-14	21:20:00	107	71	4	1280	7040	-1.04537	12.635	897	9	35	0	0
dongo16_김정분	16	2007-09-14	22:28:00	112	69	4	1348	7108	3.95464	10.6659	68	5	-2	0	0
dongo16_김정분	17	2007-09-15	06:08:00	104	51	5	368	7568	-4.04534	-7.12517	460	-8	-18	0	0
dongo16_김정분	18	2007-09-15	09:40:00	105	49	5	580	7780	-3.04533	-9.02886	212	1	-2	0	0
dongo16_김정분	19	2007-09-15	16:37:00	108	46	5	997	8197	-0.0453135	-11.8394	417	3	-3	0	0
dongo16_김정분	20	2007-09-15	23:02:00	116	72	5	1382	8582	7.9547	14.3355	385	8	26	0	0
dongo16_김정분	21	2007-09-16	06:50:00	101	61	6	410	9050	-7.04527	3.54805	468	-15	-11	0	0
dongo16_김정분	22	2007-09-16	08:06:00	108	49	6	486	9126	-0.0452706	-8.41742	76	7	-12	0	0
Result	nx	reading.date	reading.time	sbp	dbp	day	minutes	time	res.sbp	res.dbp	dtime	dsbp	ddbp	sbp.bi	dbp.bi
dongo17_김정심	1	2007-09-27	17:56:00	137	93	0	1076	1076	26.1166	17.2163	NA	NA	NA	1	1
dongo17_김정심	2	2007-09-28	05:33:00	125	92	1	333	1773	12.8899	16.3721	697	-12	-1	0	1
dongo17_김정심	3	2007-09-28	05:34:00	115	84	1	334	1774	2.8881	8.37236	1	-10	-8	0	0
dongo17_김정심	4	2007-09-28	13:47:00	106	71	1	827	2267	-6.97961	-4.51743	493	-9	-13	0	0
dongo17_김정심	5	2007-09-28	13:49:00	102	64	1	829	2269	-10.9831	-11.517	2	-4	-7	0	0
dongo17_김정심	6	2007-09-29	07:06:00	100	65	2	426	3306	-14.8083	-10.2852	1037	-2	1	0	0
dongo17_김정심	7	2007-09-29	07:08:00	97	64	2	428	3308	-17.8118	-11.2847	2	-3	-1	0	0
dongo17_김정심	8	2007-09-29	17:12:00	124	68	2	1032	3912	8.12507	-7.14971	604	27	4	0	0
dongo17_김정심	9	2007-09-29	17:13:00	118	71	2	1033	3913	2.12331	-4.14948	1	-6	3	0	0
dongo17_김정심	10	2007-09-30	06:56:00	103	62	3	416	4736	-14.3252	-12.9655	823	-15	-9	0	0
dongo17_김정심	11	2007-09-30	06:58:00	109	69	3	418	4738	-8.32875	-5.96506	2	6	7	0	0
dongo17_김정심	12	2007-09-30	19:28:00	118	72	3	1168	5488	-0.648804	-2.7974	750	9	3	0	0
dongo17_김정심	13	2007-09-30	19:30:00	124	73	3	1170	5490	5.34768	-1.79695	2	6	1	0	0
dongo17_김정심	14	2007-10-01	07:03:00	113	79	4	423	6183	-6.87205	4.35796	693	-11	6	0	0
dongo17_김정심	15	2007-10-01	07:04:00	117	76	4	424	6184	-2.87381	1.35818	1	4	-3	0	0
dongo17_김정심	16	2007-10-01	16:44:00	129	87	4	1004	6764	8.10534	12.4878	580	12	11	0	1
dongo17_김정심	17	2007-10-01	16:46:00	120	85	4	1006	6766	-0.898176	10.4883	2	-9	-2	0	1
dongo17_김정심	18	2007-10-02	08:04:00	132	78	5	484	7684	9.48608	3.6935	918	12	-7	0	0
dongo17_김정심	19	2007-10-02	08:05:00	144	87	5	485	7685	21.4843	12.6937	1	12	9	1	1
dongo17_김정심	20	2007-10-02	08:06:00	124	69	5	486	7686	1.48256	-5.30605	1	-20	-18	0	0
dongo17_김정심	21	2007-10-02	08:07:00	109	65	5	487	7687	-13.5192	-9.30583	1	-15	-4	0	0
Result	nx	reading.date	reading.time	sbp	dbp	day	minutes	time	res.sbp	res.dbp	dtime	dsbp	ddbp	sbp.bi	dbp.bi
dongo18_김화용	1	2007-11-14	19:17:00	116	72	0	1157	1157	9.41051	5.98245	NA	NA	NA	0	0
dongo18_김화용	2	2007-11-14	23:41:00	95	57	0	1421	1421	-11.659	-9.14957	264	-21	-15	0	0
dongo18_김화용	3	2007-11-14	23:42:00	112	59	0	1422	1422	5.34069	-7.15007	1	17	2	0	0
dongo18_김화용	4	2007-11-15	07:17:00	106	67	1	437	1877	-0.779186	0.622399	455	-6	8	0	0
dongo18_김화용	5	2007-11-15	07:19:00	115	65	1	439	1879	8.22029	-1.3786	2	9	-2	0	0
dongo18_김화용	6	2007-11-15	08:59:00	112	73	1	539	1979	5.19394	6.57139	100	-3	8	0	0
dongo18_김화용	7	2007-11-15	22:42:00	104	65	1	1362	2802	-3.02289	-1.84016	823	-8	-8	0	0
dongo18_김화용	8	2007-11-15	23:54:00	96	63	1	1434	2874	-11.0419	-3.87617	72	-8	-2	0	0
dongo18_김화용	9	2007-11-16	09:48:00	92	58	2	588	3468	-15.1984	-9.17321	594	-4	-5	0	0
dongo18_김화용	10	2007-11-16	22:15:00	140	111	2	1335	4215	32.6048	43.4532	747	48	53	1	1
dongo18_김화용	11	2007-11-16	22:17:00	101	67	2	1337	4217	-6.39568	-0.547755	2	-39	-44	0	0
dongo18_김화용	12	2007-11-17	08:54:00	104	71	3	534	4854	-3.56351	3.1337	637	3	4	0	0
dongo18_김화용	13	2007-11-17	21:22:00	87	56	3	1282	5602	-20.7606	-12.2403	748	-17	-15	0	0
dongo18_김화용	14	2007-11-17	21:24:00	97	61	3	1284	5604	-10.7611	-7.24135	2	10	5	0	0
dongo18_김화용	15	2007-11-17	21:25:00	101	64	3	1285	5605	-6.76137	-4.24185	1	4	3	0	0
dongo18_김화용	16	2007-11-17	21:26:00	106	64	3	1286	5606	-1.76163	-4.24235	1	5	0	0	0
dongo18_김화용	17	2007-11-18	00:16:00	108	65	4	16	5776	0.19358	-3.32736	170	2	1	0	0
dongo18_김화용	18	2007-11-18	00:17:00	104	64	4	17	5777	-3.80668	-4.32786	1	-4	-1	0	0
dongo18_김화용	19	2007-11-18	08:14:00	117	69	4	494	6254	9.06765	0.433611	477	13	5	0	0
dongo18_김화용	20	2007-11-18	08:15:00	121	72	4	495	6255	13.0674	3.43311	1	4	3	0	0
dongo18_김화용	21	2007-11-18	08:17:00	117	71	4	497	6257	9.06686	2.43211	2	-4	-1	0	0
dongo18_김화용	22	2007-11-18	22:48:00	110	70	4	1368	7128	1.83738	0.996553	871	-7	-1	0	0
dongo18_김화용	23	2007-11-18	22:50:00	110	72	4	1370	7130	1.83685	2.99555	2	0	2	0	0
dongo18_김화용	24	2007-11-19	09:16:00	108	68	5	556	7756	-0.328073	-1.31749	626	-2	-4	0	0
Result	nx	reading.date	reading.time	sbp	dbp	day	minutes	time	res.sbp	res.dbp	dtime	dsbp	ddbp	sbp.bi	dbp.bi
dongo19_김향남	1	2007-10-02	20:47:00	112	67	0	1247	1247	-0.78397	-4.27358	NA	NA	NA	0	0
dongo19_김향남	2	2007-10-02	21:55:00	107	68	0	1315	1315	-5.83899	-3.32987	68	-5	1	0	0
dongo19_김향남	3	2007-10-03	08:26:00	113	81	1	506	1946	-0.349541	9.1478	631	6	13	0	0
dongo19_김향남	4	2007-10-03	10:12:00	113	67	1	612	2052	-0.435307	-4.93995	106	0	-14	0	0
dongo19_김향남	5	2007-10-03	19:14:00	116	70	1	1154	2594	2.12615	-2.38861	542	3	3	0	0
dongo19_김향남	6	2007-10-03	21:53:00	125	78	1	1313	2753	10.9975	5.47977	159	9	8	0	0
dongo19_김향남	7	2007-10-04	06:42:00	113	78	2	402	3282	-1.43052	5.04186	529	-12	0	0	0
dongo19_김향남	8	2007-10-04	07:04:00	112	74	2	424	3304	-2.44832	1.02365	22	-1	-4	0	0
dongo19_김향남	9	2007-10-04	20:48:00	117	72	2	1248	4128	1.88497	-1.65845	824	5	-2	0	0
dongo19_김향남	10	2007-10-04	21:49:00	113	70	2	1309	4189	-2.16439	-3.70895	61	-4	-2	0	0
dongo19_김향남	11	2007-10-05	06:46:00	127	79	3	406	4726	11.4011	4.84653	537	14	9	0	0
dongo19_김향남	12	2007-10-05	07:30:00	109	73	3	450	4770	-6.63448	-1.18989	44	-18	-6	0	0
dongo19_김향남	13	2007-10-05	20:25:00	112	77	3	1225	5545	-4.26155	2.16856	775	3	4	0	0
dongo19_김향남	14	2007-10-05	22:39:00	112	69	3	1359	5679	-4.36997	-5.94236	134	0	-8	0	0
dongo19_김향남	15	2007-10-06	07:14:00	119	78	4	434	6194	2.21334	2.63133	515	7	9	0	0
dongo19_김향남	16	2007-10-06	08:13:00	118	76	4	493	6253	1.1656	0.582486	59	-1	-2	0	0
dongo19_김향남	17	2007-10-06	21:37:00	112	69	4	1297	7057	-5.48493	-7.08306	804	-6	-7	0	0
dongo19_김향남	18	2007-10-06	22:15:00	120	72	4	1335	7095	2.48433	-4.11452	38	8	3	0	0
dongo19_김향남	19	2007-10-07	07:59:00	120	83	5	479	7679	2.0118	6.40205	584	0	11	0	0
dongo19_김향남	20	2007-10-07	09:56:00	118	78	5	596	7796	-0.0828629	1.3052	117	-2	-5	0	0
Result	nx	reading.date	reading.time	sbp	dbp	day	minutes	time	res.sbp	res.dbp	dtime	dsbp	ddbp	sbp.bi	dbp.bi
dongo20_노영자	1	2007-10-10	20:20:00	136	91	0	1220	1220	-1.62478	1.99136	NA	NA	NA	1	1
dongo20_노영자	2	2007-10-10	22:22:00	126	86	0	1342	1342	-11.7752	-3.04055	122	-10	-5	0	1
dongo20_노영자	3	2007-10-11	07:48:00	136	79	1	468	1908	-2.4729	-10.1886	566	10	-7	1	0
dongo20_노영자	4	2007-10-11	08:25:00	134	75	1	505	1945	-4.51851	-14.1983	37	-2	-4	0	0
dongo20_노영자	5	2007-10-11	18:57:00	160	110	1	1137	2577	20.7024	20.6365	632	26	35	1	1
dongo20_노영자	6	2007-10-11	19:01:00	152	92	1	1141	2581	12.6975	2.63541	4	-8	-18	1	1
dongo20_노영자	7	2007-10-11	21:17:00	156	98	1	1277	2717	16.5298	8.59984	136	4	6	1	1
dongo20_노영자	8	2007-10-11	21:20:00	88	70	1	1280	2720	-51.4739	-19.4009	3	-68	-28	0	0
dongo20_노영자	9	2007-10-11	21:22:00	149	86	1	1282	2722	9.52367	-3.40146	2	61	16	1	1
dongo20_노영자	10	2007-10-12	06:49:00	141	102	2	409	3289	0.824712	12.4502	567	-8	16	1	1
dongo20_노영자	11	2007-10-12	09:09:00	144	89	2	549	3429	3.65213	-0.586367	140	3	-13	1	1
dongo20_노영자	12	2007-10-12	18:33:00	165	100	2	1113	3993	23.9569	10.2661	564	21	11	1	1
dongo20_노영자	13	2007-10-12	23:58:00	146	112	2	1438	4318	4.55624	22.1811	325	-19	12	1	1
dongo20_노영자	14	2007-10-13	08:20:00	134	87	3	500	4820	-8.06259	-2.95016	502	-12	-25	0	1
dongo20_노영자	15	2007-10-13	23:09:00	160	86	3	1389	5709	16.8415	-4.18266	889	26	-1	1	1
dongo20_노영자	16	2007-10-13	23:12:00	154	87	3	1392	5712	10.8378	-3.18344	3	-6	1	1	1
dongo20_노영자	17	2007-10-14	06:44:00	163	100	4	404	6164	19.2806	9.69834	452	9	13	1	1
dongo20_노영자	18	2007-10-14	08:59:00	80	59	4	539	6299	-63.8858	-31.337	135	-83	-41	0	0
dongo20_노영자	19	2007-10-14	09:01:00	128	80	4	541	6301	-15.8883	-10.3375	2	48	21	0	0
dongo20_노영자	20	2007-10-14	19:02:00	168	97	4	1142	6902	23.3709	6.50533	601	40	17	1	1
dongo20_노영자	21	2007-10-15	06:32:00	141	90	5	392	7592	-4.4797	-0.675124	690	-27	-7	1	1
dongo20_노영자	22	2007-10-15	06:37:00	135	92	5	397	7597	-10.4859	1.32357	5	-6	2	1	1
dongo20_노영자	23	2007-10-15	21:02:00	164	97	5	1262	8462	17.4478	6.09734	865	29	5	1	1
dongo20_노영자	24	2007-10-15	21:04:00	141	92	5	1264	8464	-5.55463	1.09682	2	-23	-5	1	1
Result	nx	reading.date	reading.time	sbp	dbp	day	minutes	time	res.sbp	res.dbp	dtime	dsbp	ddbp	sbp.bi	dbp.bi
dongo21_라경선	1	2007-11-27	10:32:00	120	83	0	632	632	-1.90579	0.822719	NA	NA	NA	0	0
dongo21_라경선	2	2007-11-27	23:16:00	140	96	0	1396	1396	17.3673	13.0978	764	20	13	1	1
dongo21_라경선	3	2007-11-27	23:49:00	124	87	0	1429	1429	1.33589	4.06648	33	-16	-9	0	1
dongo21_라경선	4	2007-11-28	07:16:00	95	56	1	436	1876	-28.0894	-27.3577	447	-29	-31	0	0
dongo21_라경선	5	2007-11-28	08:59:00	115	82	1	539	1979	-8.18742	-1.4554	103	20	26	0	0
dongo21_라경선	6	2007-11-28	17:15:00	131	96	1	1035	2475	7.34066	12.074	496	16	14	0	1
dongo21_라경선	7	2007-11-28	21:17:00	132	86	1	1277	2717	8.1104	1.84434	242	1	-10	0	1
dongo21_라경선	8	2007-11-29	08:48:00	131	84	2	528	3408	6.45294	-0.81132	691	-1	-2	0	0
dongo21_라경선	9	2007-11-29	11:24:00	120	81	2	684	3564	-4.69549	-3.95934	156	-11	-3	0	0
dongo21_라경선	10	2007-11-29	17:36:00	131	89	2	1056	3936	5.95056	3.68768	372	11	8	0	1
dongo21_라경선	11	2007-11-29	23:28:00	126	90	2	1408	4288	0.615643	4.35368	352	-5	1	0	1
dongo21_라경선	12	2007-11-30	09:33:00	117	80	3	573	4893	-8.96	-6.22038	605	-9	-10	0	0
dongo21_라경선	13	2007-11-30	10:25:00	131	78	3	625	4945	4.99053	-8.26972	52	14	-2	0	0
dongo21_라경선	14	2007-11-30	22:31:00	137	90	3	1351	5671	10.2998	3.04141	726	6	12	1	1
dongo21_라경선	15	2007-12-01	01:06:00	121	88	4	66	5826	-5.84772	0.894333	155	-16	-2	0	1
dongo21_라경선	16	2007-12-01	08:22:00	120	87	4	502	6262	-7.26256	-0.51937	436	-1	-1	0	1
dongo21_라경선	17	2007-12-01	10:39:00	129	87	4	639	6399	1.60709	-0.649364	137	9	0	0	1
dongo21_라경선	18	2007-12-01	21:05:00	140	99	4	1265	7025	12.0115	10.7566	626	11	12	1	1
dongo21_라경선	19	2007-12-01	23:15:00	128	92	4	1395	7155	-0.112217	3.6333	130	-12	-7	0	1
dongo21_라경선	20	2007-12-02	09:17:00	118	80	5	557	7757	-10.685	-8.93792	602	-10	-12	0	0
dongo21_라경선	21	2007-12-02	10:15:00	120	84	5	615	7815	-8.74019	-4.99295	58	2	4	0	0
dongo21_라경선	22	2007-12-02	17:16:00	135	91	5	1036	8236	5.85925	1.60758	421	15	7	1	1
dongo21_라경선	23	2007-12-02	22:47:00	132	93	5	1367	8567	2.54431	3.2935	331	-3	2	0	1
Result	nx	reading.date	reading.time	sbp	dbp	day	minutes	time	res.sbp	res.dbp	dtime	dsbp	ddbp	sbp.bi	dbp.bi
dongo22_문남수	1	2007-10-02	20:34:00	114	79	0	1234	1234	-1.40905	1.78909	NA	NA	NA	0	0
dongo22_문남수	2	2007-10-02	20:38:00	112	74	0	1238	1238	-3.40889	-3.21176	4	-2	-5	0	0
dongo22_문남수	3	2007-10-02	21:50:00	120	78	0	1310	1310	4.59402	0.773006	72	8	4	0	0
dongo22_문남수	4	2007-10-03	07:19:00	114	84	1	439	1879	-1.383	6.65258	569	-6	6	0	0
dongo22_문남수	5	2007-10-03	10:08:00	120	82	1	608	2048	4.62383	4.61682	169	6	-2	0	0
dongo22_문남수	6	2007-10-03	19:01:00	120	84	1	1141	2581	4.64536	6.50401	533	0	2	0	0
dongo22_문남수	7	2007-10-03	20:43:00	118	69	1	1243	2683	2.64948	-8.51757	102	-2	-15	0	0
dongo22_문남수	8	2007-10-04	06:33:00	112	82	2	393	3273	-3.32669	4.35756	590	-6	13	0	0
dongo22_문남수	9	2007-10-04	09:48:00	107	72	2	588	3468	-8.31882	-5.68371	195	-5	-10	0	0
dongo22_문남수	10	2007-10-04	19:14:00	113	77	2	1154	4034	-2.29595	-0.803497	566	6	5	0	0
dongo22_문남수	11	2007-10-04	21:25:00	113	73	2	1285	4165	-2.29066	-4.83122	131	0	-4	0	0
dongo22_문남수	12	2007-10-05	06:37:00	106	62	3	397	4717	-9.26836	-15.948	552	-7	-11	0	0
dongo22_문남수	13	2007-10-05	08:45:00	127	82	3	525	4845	11.7368	4.02486	128	21	20	0	0
dongo22_문남수	14	2007-10-05	17:00:00	122	87	3	1020	5340	6.7568	8.9201	495	-5	5	0	1
dongo22_문남수	15	2007-10-05	20:29:00	109	72	3	1229	5549	-6.23476	-6.12413	209	-13	-15	0	0
dongo22_문남수	16	2007-10-06	06:46:00	113	80	4	406	6166	-2.20983	1.74529	617	4	8	0	0
dongo22_문남수	17	2007-10-06	08:37:00	121	73	4	517	6277	5.79465	-5.2782	111	8	-7	0	0
dongo22_문남수	18	2007-10-06	18:50:00	119	91	4	1130	6890	3.81941	12.5921	613	-2	18	0	1
dongo22_문남수	19	2007-10-06	20:55:00	111	73	4	1255	7015	-4.17554	-5.43439	125	-8	-18	0	0
dongo22_문남수	20	2007-10-07	06:36:00	112	81	5	396	7596	-3.15207	2.44265	581	1	8	0	0
dongo22_문남수	21	2007-10-07	08:49:00	118	80	5	529	7729	2.8533	1.4145	133	6	-1	0	0
Result	nx	reading.date	reading.time	sbp	dbp	day	minutes	time	res.sbp	res.dbp	dtime	dsbp	ddbp	sbp.bi	dbp.bi
dongo23_문명수	1	2007-09-10	21:53:00	119	84	0	1313	1313	-5.81509	-2.72994	NA	NA	NA	0	0
dongo23_문명수	2	2007-09-10	21:54:00	125	86	0	1314	1314	0.184645	-0.729606	1	6	2	0	1
dongo23_문명수	3	2007-09-10	21:55:00	123	82	0	1315	1315	-1.81562	-4.72927	1	-2	-4	0	0
dongo23_문명수	4	2007-09-10	21:56:00	126	88	0	1316	1316	1.18411	1.27106	1	3	6	0	1
dongo23_문명수	5	2007-09-10	21:56:00	123	84	0	1316	1316	-1.81589	-2.72894	0	-3	-4	0	0
dongo23_문명수	6	2007-09-10	21:57:00	124	92	0	1317	1317	-0.816151	5.27139	1	1	8	0	1
dongo23_문명수	7	2007-09-10	21:58:00	124	90	0	1318	1318	-0.816417	3.27172	1	0	-2	0	1
dongo23_문명수	8	2007-09-10	21:58:00	122	86	0	1318	1318	-2.81642	-0.72828	0	-2	-4	0	1
dongo23_문명수	9	2007-09-11	06:50:00	136	97	1	410	1850	11.0423	10.448	532	14	11	1	1
dongo23_문명수	10	2007-09-11	06:54:00	124	90	1	414	1854	-0.958735	3.44935	4	-12	-7	0	1
dongo23_문명수	11	2007-09-11	21:54:00	123	76	1	1314	2754	-2.1977	-10.2524	900	-1	-14	0	0
dongo23_문명수	12	2007-09-11	21:55:00	121	80	1	1315	2755	-4.19797	-6.25205	1	-2	4	0	0
dongo23_문명수	13	2007-09-12	06:30:00	128	88	2	390	3270	2.66529	1.91863	515	7	8	0	1
dongo23_문명수	14	2007-09-12	06:31:00	121	88	2	391	3271	-4.33498	1.91896	1	-7	0	0	1
dongo23_문명수	15	2007-09-12	22:42:00	128	86	2	1362	4242	2.4072	0.240753	971	7	-2	0	1
dongo23_문명수	16	2007-09-12	22:43:00	131	87	2	1363	4243	5.40694	1.24108	1	3	1	0	1
dongo23_문명수	17	2007-09-13	06:10:00	127	84	3	370	4690	1.28825	-1.61078	447	-4	-3	0	0
dongo23_문명수	18	2007-09-13	06:11:00	139	87	3	371	4691	13.288	1.38955	1	12	3	1	1
dongo23_문명수	19	2007-09-13	22:39:00	123	78	3	1359	5679	-2.97435	-7.28302	988	-16	-9	0	0
dongo23_문명수	20	2007-09-13	22:40:00	123	82	3	1360	5680	-2.97462	-3.28268	1	0	4	0	0
dongo23_문명수	21	2007-09-14	07:32:00	130	86	4	452	6212	3.88413	0.893624	532	7	4	0	1
dongo23_문명수	22	2007-09-14	07:33:00	124	92	4	453	6213	-2.11614	6.89396	1	-6	6	0	1
dongo23_문명수	23	2007-09-14	23:00:00	129	85	4	1380	7140	2.63773	0.201169	927	5	-7	0	1
dongo23_문명수	24	2007-09-14	23:00:00	122	85	4	1380	7140	-4.36227	0.201169	0	-7	0	0	1
dongo23_문명수	25	2007-09-15	06:54:00	127	86	5	414	7614	0.511869	1.35826	474	5	1	0	1
dongo23_문명수	26	2007-09-15	06:54:00	120	85	5	414	7614	-6.48813	0.358256	0	-7	-1	0	1
Result	nx	reading.date	reading.time	sbp	dbp	day	minutes	time	res.sbp	res.dbp	dtime	dsbp	ddbp	sbp.bi	dbp.bi
dongo24_문정수	1	2007-09-11	19:05:00	137	64	0	1145	1145	22.9885	-4.36057	NA	NA	NA	1	0
dongo24_문정수	2	2007-09-11	22:04:00	98	68	0	1324	1324	-16.1922	-0.462824	179	-39	4	0	0
dongo24_문정수	3	2007-09-12	06:52:00	112	68	1	412	1852	-2.72509	-0.764437	528	14	0	0	0
dongo24_문정수	4	2007-09-12	09:39:00	114	69	1	579	2019	-0.893649	0.140166	167	2	1	0	0
dongo24_문정수	5	2007-09-12	19:38:00	122	70	1	1178	2618	6.50175	0.797994	599	8	1	0	0
dongo24_문정수	6	2007-09-12	22:07:00	86	72	1	1327	2767	-29.6486	2.71288	149	-36	2	0	0
dongo24_문정수	7	2007-09-13	06:30:00	140	68	2	390	3270	23.8437	-1.57445	503	54	-4	1	0
dongo24_문정수	8	2007-09-13	13:13:00	116	75	2	793	3673	-0.563112	5.19534	403	-24	7	0	0
dongo24_문정수	9	2007-09-13	18:46:00	118	72	2	1126	4006	1.10078	2.00512	333	2	-3	0	0
dongo24_문정수	10	2007-09-13	22:15:00	109	66	2	1335	4215	-8.11018	-4.11427	209	-9	-6	0	0
dongo24_문정수	11	2007-09-14	06:10:00	108	66	3	370	4690	-9.58962	-4.38561	475	-1	0	0	0
dongo24_문정수	12	2007-09-14	12:07:00	128	78	3	727	5047	10.05	7.41046	357	20	12	0	0
dongo24_문정수	13	2007-09-14	14:59:00	128	75	3	899	5219	9.87644	4.3122	172	0	-3	0	0
dongo24_문정수	14	2007-09-14	21:59:00	101	64	3	1319	5639	-17.5475	-6.92772	420	-27	-11	0	0
dongo24_문정수	15	2007-09-15	05:53:00	120	72	4	353	6113	0.974078	0.801516	474	19	8	0	0
dongo24_문정수	16	2007-09-15	06:54:00	128	76	4	414	6174	8.91251	4.76667	61	8	4	0	0
dongo24_문정수	17	2007-09-15	15:31:00	125	68	4	931	6691	5.39067	-3.52866	517	-3	-8	0	0
dongo24_문정수	18	2007-09-15	22:14:00	122	76	4	1334	7094	1.98391	4.24113	403	-3	8	0	0
dongo24_문정수	19	2007-09-16	06:59:00	115	69	5	419	7619	-5.546	-3.05877	525	-7	-7	0	0
dongo24_문정수	20	2007-09-16	11:17:00	120	69	5	677	7877	-0.806413	-3.20615	258	5	0	0	0
Result	nx	reading.date	reading.time	sbp	dbp	day	minutes	time	res.sbp	res.dbp	dtime	dsbp	ddbp	sbp.bi	dbp.bi
dongo25_문천수	1	2007-09-17	18:20:00	149	117	0	1100	1100	0	0	NA	NA	NA	1	1
dongo25_문천수	2	2007-09-18	11:21:00	147	100	1	681	2121	0	0	1021	-2	-17	1	1
Result	nx	reading.date	reading.time	sbp	dbp	day	minutes	time	res.sbp	res.dbp	dtime	dsbp	ddbp	sbp.bi	dbp.bi
dongo26_문필수	1	2007-09-27	18:14:00	118	84	0	1094	1094	-1.52492	9.22644	NA	NA	NA	0	0
dongo26_문필수	2	2007-09-27	20:40:00	118	75	0	1240	1240	-1.43211	0.226945	146	0	-9	0	0
dongo26_문필수	3	2007-09-28	06:37:00	122	78	1	397	1837	2.9474	3.22901	597	4	3	0	0
dongo26_문필수	4	2007-09-28	10:02:00	120	70	1	602	2042	1.07771	-4.77028	205	-2	-8	0	0
dongo26_문필수	5	2007-09-28	17:07:00	116	77	1	1027	2467	-2.65212	2.23118	425	-4	7	0	0
dongo26_문필수	6	2007-09-28	21:36:00	123	77	1	1296	2736	4.51888	2.23211	269	7	0	0	0
dongo26_문필수	7	2007-09-29	07:33:00	120	72	2	453	3333	1.89839	-2.76582	597	-3	-5	0	0
dongo26_문필수	8	2007-09-29	10:45:00	119	65	2	645	3525	1.02044	-9.76516	192	-1	-7	0	0
dongo26_문필수	9	2007-09-29	15:53:00	123	73	2	953	3833	5.21623	-1.76409	308	4	8	0	0
dongo26_문필수	10	2007-09-29	22:02:00	120	72	2	1322	4202	2.4508	-2.76282	369	-3	-1	0	0
dongo26_문필수	11	2007-09-30	05:47:00	107	72	3	347	4667	-10.2536	-2.76121	465	-13	0	0	0
dongo26_문필수	12	2007-09-30	07:45:00	117	76	3	465	4785	-0.178591	1.2392	118	10	4	0	0
dongo26_문필수	13	2007-09-30	12:12:00	110	69	3	732	5052	-7.00886	-5.75988	267	-7	-7	0	0
dongo26_문필수	14	2007-09-30	17:04:00	108	72	3	1024	5344	-8.82324	-2.75887	292	-2	3	0	0
dongo26_문필수	15	2007-09-30	20:34:00	117	77	3	1234	5554	0.310254	2.24185	210	9	5	0	0
dongo26_문필수	16	2007-10-01	07:51:00	119	79	4	471	6231	2.74062	4.24419	677	2	2	0	0
dongo26_문필수	17	2007-10-01	10:56:00	122	79	4	656	6416	5.85822	4.24483	185	3	0	0	0
dongo26_문필수	18	2007-10-01	17:50:00	117	76	4	1070	6830	1.12139	1.24626	414	-5	-3	0	0
dongo26_문필수	19	2007-10-01	20:48:00	120	76	4	1248	7008	4.23455	1.24688	178	3	0	0	0
dongo26_문필수	20	2007-10-02	08:33:00	119	78	5	513	7713	3.68271	3.24931	705	-1	2	0	0
dongo26_문필수	21	2007-10-02	11:31:00	110	73	5	691	7891	-5.20414	-1.75007	178	-9	-5	0	0
Result	nx	reading.date	reading.time	sbp	dbp	day	minutes	time	res.sbp	res.dbp	dtime	dsbp	ddbp	sbp.bi	dbp.bi
dongo27_문현숙	1	2007-09-22	19:49:00	163	85	0	1189	1189	7.44732	2.39453	NA	NA	NA	1	1
dongo27_문현숙	2	2007-09-22	19:50:00	160	83	0	1190	1190	4.44952	0.394637	1	-3	-2	1	0
dongo27_문현숙	3	2007-09-22	19:52:00	164	84	0	1192	1192	8.45391	1.39486	2	4	1	1	0
dongo27_문현숙	4	2007-09-22	19:58:00	167	84	0	1198	1198	11.4671	1.39552	6	3	0	1	0
dongo27_문현숙	5	2007-09-22	21:58:00	172	87	0	1318	1318	16.7306	4.40879	120	5	3	1	1
dongo27_문현숙	6	2007-09-22	21:59:00	164	84	0	1319	1319	8.73277	1.4089	1	-8	-3	1	0
dongo27_문현숙	7	2007-09-22	22:01:00	160	91	0	1321	1321	4.73716	8.40912	2	-4	7	1	1
dongo27_문현숙	8	2007-09-23	08:30:00	141	82	1	510	1950	-12.8817	-0.52136	629	-19	-9	1	0
dongo27_문현숙	9	2007-09-23	08:31:00	144	76	1	511	1951	-9.8795	-6.52125	1	3	-6	1	0
dongo27_문현숙	10	2007-09-23	09:28:00	123	72	1	568	2008	-30.7543	-10.5149	57	-21	-4	0	0
dongo27_문현숙	11	2007-09-23	09:30:00	135	80	1	570	2010	-18.7499	-2.51473	2	12	8	1	0
dongo27_문현숙	12	2007-09-23	09:50:00	175	96	1	590	2030	21.294	13.4875	20	40	16	1	1
dongo27_문현숙	13	2007-09-23	22:00:00	168	88	1	1320	2760	15.8969	5.56817	730	-7	-8	1	1
dongo27_문현숙	14	2007-09-23	22:02:00	169	87	1	1322	2762	16.9013	4.56839	2	1	-1	1	1
dongo27_문현숙	15	2007-09-24	09:58:00	150	88	2	598	3478	-0.526548	5.64753	716	-19	1	1	1
dongo27_문현숙	16	2007-09-24	20:38:00	128	70	2	1238	4118	-21.1213	-12.2817	640	-22	-18	0	0
dongo27_문현숙	17	2007-09-25	06:41:00	116	64	3	401	4721	-31.7972	-18.2151	603	-12	-6	0	0
dongo27_문현숙	18	2007-09-25	06:43:00	110	62	3	403	4723	-37.7928	-20.2149	2	-6	-2	0	0
dongo27_문현숙	19	2007-09-25	06:46:00	109	60	3	406	4726	-38.7862	-22.2145	3	-1	-2	0	0
dongo27_문현숙	20	2007-09-25	06:50:00	126	73	3	410	4730	-21.7774	-9.21409	4	17	13	0	0
dongo27_문현숙	21	2007-09-25	22:44:00	200	100	3	1364	5684	54.3173	17.8914	954	74	27	1	1
dongo27_문현숙	22	2007-09-25	22:45:00	188	93	3	1365	5685	42.3195	10.8915	1	-12	-7	1	1
dongo27_문현숙	23	2007-09-26	12:02:00	136	85	4	722	6482	-7.93044	2.97956	797	-52	-8	1	1
dongo27_문현숙	24	2007-09-26	13:23:00	152	95	4	803	6563	8.24742	12.9885	81	16	10	1	1
dongo27_문현숙	25	2007-09-26	20:11:00	136	86	4	1211	6971	-6.8567	4.03361	408	-16	-9	1	1
dongo27_문현숙	26	2007-09-26	21:44:00	159	92	4	1304	7064	16.3475	10.0439	93	23	6	1	1
dongo27_문현숙	27	2007-09-26	21:45:00	137	85	4	1305	7065	-5.6503	3.044	1	-22	-7	1	1
dongo27_문현숙	28	2007-09-27	10:46:00	149	80	5	646	7846	8.0646	-1.86968	781	12	-5	1	0
dongo27_문현숙	29	2007-09-27	11:01:00	140	75	5	661	7861	-0.902464	-6.86802	15	-9	-5	1	0
Result	nx	reading.date	reading.time	sbp	dbp	day	minutes	time	res.sbp	res.dbp	dtime	dsbp	ddbp	sbp.bi	dbp.bi
dongo28_문현식	1	2007-12-13	17:56:00	149	77	0	1076	1076	1.01071	3.90587	NA	NA	NA	1	0
dongo28_문현식	2	2007-12-13	21:10:00	140	68	0	1270	1270	-8.22152	-5.27819	194	-9	-9	1	0
dongo28_문현식	3	2007-12-14	05:07:00	136	68	1	307	1747	-12.7925	-5.73076	477	-4	0	1	0
dongo28_문현식	4	2007-12-14	17:00:00	152	82	1	1020	2460	2.35397	7.59276	713	16	14	1	0
dongo28_문현식	5	2007-12-14	21:21:00	161	71	1	1281	2721	11.0415	-3.65488	261	9	-11	1	0
dongo28_문현식	6	2007-12-15	05:17:00	144	80	2	317	3197	-6.52826	4.8935	476	-17	9	1	0
dongo28_문현식	7	2007-12-15	08:21:00	155	73	2	501	3381	4.25148	-2.28107	184	11	-7	1	0
dongo28_문현식	8	2007-12-15	17:20:00	150	74	2	1040	3920	-1.39374	-1.79247	539	-5	1	1	0
dongo28_문현식	9	2007-12-15	21:07:00	169	69	2	1267	4147	17.3345	-7.00784	227	19	-5	1	0
dongo28_문현식	10	2007-12-16	06:21:00	143	80	3	381	4701	-9.32865	3.46653	554	-26	11	1	0
dongo28_문현식	11	2007-12-16	08:09:00	155	88	3	489	4809	2.54207	11.3641	108	12	8	1	1
dongo28_문현식	12	2007-12-16	17:28:00	160	72	3	1048	5368	6.87291	-5.16631	559	5	-16	1	0
dongo28_문현식	13	2007-12-16	21:02:00	144	78	3	1262	5582	-9.38327	0.630655	214	-16	6	1	0
dongo28_문현식	14	2007-12-17	06:13:00	151	78	4	373	6133	-3.04285	0.107876	551	7	0	1	0
dongo28_문현식	15	2007-12-17	08:11:00	148	78	4	491	6251	-6.1841	-0.00408075	118	-3	0	1	0
dongo28_문현식	16	2007-12-17	17:12:00	160	84	4	1032	6792	5.16828	5.48263	541	12	6	1	0
dongo28_문현식	17	2007-12-17	21:07:00	157	68	4	1267	7027	1.88697	-10.7403	235	-3	-16	1	0
dongo28_문현식	18	2007-12-18	06:49:00	156	80	5	409	7609	0.190279	0.707472	582	-1	12	1	0
dongo28_문현식	19	2007-12-18	07:40:00	151	84	5	460	7660	-4.87077	4.65908	51	-5	4	1	0
dongo28_문현식	20	2007-12-18	16:53:00	161	78	5	1013	8213	4.46725	-1.86559	553	10	-6	1	0
dongo28_문현식	21	2007-12-18	21:15:00	152	78	5	1275	8475	-4.84638	-2.11417	262	-9	0	1	0
dongo28_문현식	22	2007-12-19	06:29:00	178	88	6	389	9029	20.4904	7.3602	554	26	10	1	1
dongo28_문현식	23	2007-12-19	07:26:00	186	88	6	446	9086	28.4222	7.30612	57	8	0	1	1
dongo28_문현식	24	2007-12-19	17:20:00	155	77	6	1040	9680	-3.28884	-4.25746	594	-31	-11	1	0
dongo28_문현식	25	2007-12-19	21:09:00	156	76	6	1269	9909	-2.56297	-5.47473	229	1	-1	1	0
dongo28_문현식	26	2007-12-20	06:43:00	148	84	7	403	10483	-11.2501	1.98067	574	-8	8	1	0
dongo28_문현식	27	2007-12-20	07:57:00	137	78	7	477	10557	-22.3387	-4.08954	74	-11	-6	1	0
Result	nx	reading.date	reading.time	sbp	dbp	day	minutes	time	res.sbp	res.dbp	dtime	dsbp	ddbp	sbp.bi	dbp.bi
dongo29_문현진	1	2007-11-20	17:57:00	144	90	0	1077	1077	11.7624	8.52842	NA	NA	NA	1	1
dongo29_문현진	2	2007-11-20	21:30:00	137	77	0	1290	1290	4.64407	-4.64427	213	-7	-13	1	0
dongo29_문현진	3	2007-11-21	07:02:00	141	92	1	422	1862	8.32633	9.89198	572	4	15	1	1
dongo29_문현진	4	2007-11-21	09:36:00	125	78	1	576	2016	-7.75921	-4.23288	154	-16	-14	0	0
dongo29_문현진	5	2007-11-21	18:05:00	138	84	1	1085	2525	4.95805	1.35445	509	13	6	1	0
dongo29_문현진	6	2007-11-21	21:09:00	116	76	1	1269	2709	-17.1442	-6.79473	184	-22	-8	0	0
dongo29_문현진	7	2007-11-22	07:02:00	123	80	2	422	3302	-10.4736	-3.27551	593	7	4	0	0
dongo29_문현진	8	2007-11-22	09:13:00	126	80	2	553	3433	-7.54632	-3.38172	131	3	0	0	0
dongo29_문현진	9	2007-11-24	07:19:00	153	93	4	439	6199	17.9172	7.37574	2766	27	13	1	1
dongo29_문현진	10	2007-11-24	09:14:00	146	85	4	554	6314	10.8533	-0.7175	115	-7	-8	1	1
dongo29_문현진	11	2007-11-24	18:28:00	128	81	4	1108	6868	-7.45439	-5.16666	554	-18	-4	0	0
dongo29_문현진	12	2007-11-24	20:29:00	119	77	4	1229	6989	-16.5216	-9.26476	121	-9	-4	0	0
dongo29_문현진	13	2007-11-25	07:08:00	140	87	5	428	7628	4.12345	0.217169	639	21	10	1	1
dongo29_문현진	14	2007-11-25	13:31:00	149	97	5	811	8011	12.9107	9.90665	383	9	10	1	1
dongo29_문현진	15	2007-11-25	18:12:00	131	84	5	1092	8292	-5.24539	-3.32117	281	-18	-13	0	0
dongo29_문현진	16	2007-11-25	21:22:00	133	91	5	1282	8482	-3.35093	3.52479	190	2	7	0	1
Result	nx	reading.date	reading.time	sbp	dbp	day	minutes	time	res.sbp	res.dbp	dtime	dsbp	ddbp	sbp.bi	dbp.bi
dongo30_박귀연	1	2007-11-13	07:09:00	110	60	0	429	429	-11.3062	-13.6966	NA	NA	NA	0	0
dongo30_박귀연	2	2007-11-13	08:10:00	114	65	0	490	490	-7.24518	-8.64317	61	4	5	0	0
dongo30_박귀연	3	2007-11-13	18:30:00	116	65	0	1110	1110	-4.6251	-8.10059	620	2	0	0	0
dongo30_박귀연	4	2007-11-13	22:48:00	124	77	0	1368	1368	3.63293	4.1252	258	8	12	0	0
dongo30_박귀연	5	2007-11-14	07:28:00	116	76	1	448	1888	-3.847	3.58026	520	-8	-1	0	0
dongo30_박귀연	6	2007-11-14	08:37:00	117	72	1	517	1957	-2.77799	-0.359352	69	1	-4	0	0
dongo30_박귀연	7	2007-11-14	18:12:00	122	74	1	1092	2532	2.79708	2.14385	575	5	2	0	0
dongo30_박귀연	8	2007-11-15	00:14:00	118	74	2	14	2894	-0.840874	2.46065	362	-4	0	0	0
dongo30_박귀연	9	2007-11-15	05:06:00	120	73	2	306	3186	1.45116	1.71618	292	2	-1	0	0
dongo30_박귀연	10	2007-11-15	10:47:00	120	77	2	647	3527	1.79221	6.0146	341	0	4	0	0
dongo30_박귀연	11	2007-11-15	18:47:00	136	80	2	1127	4007	18.2723	9.43467	480	16	3	1	0
dongo30_박귀연	12	2007-11-15	18:48:00	128	78	2	1128	4008	10.2733	7.43554	1	-8	-2	0	0
dongo30_박귀연	13	2007-11-16	00:17:00	126	79	3	17	4337	8.60231	8.72346	329	-2	1	0	0
dongo30_박귀연	14	2007-11-16	08:13:00	126	80	3	493	4813	9.07837	10.14	476	0	1	0	0
dongo30_박귀연	15	2007-11-16	09:32:00	116	64	3	572	4892	-0.842622	-5.79084	79	-10	-16	0	0
dongo30_박귀연	16	2007-11-16	18:02:00	134	84	3	1082	5402	17.6674	14.6555	510	18	20	0	0
dongo30_박귀연	17	2007-11-16	23:24:00	116	74	3	1404	5724	-0.0105168	4.93727	322	-18	-10	0	0
dongo30_박귀연	18	2007-11-17	08:12:00	108	66	4	492	6252	-7.48245	-2.60067	528	-8	-8	0	0
dongo30_박귀연	19	2007-11-17	08:26:00	100	57	4	506	6266	-15.4684	-11.5884	14	-8	-9	0	0
dongo30_박귀연	20	2007-11-17	23:21:00	109	52	4	1401	7161	-5.57334	-15.8052	895	9	-5	0	0
dongo30_박귀연	21	2007-11-17	23:47:00	101	59	4	1427	7187	-13.5473	-8.78242	26	-8	7	0	0
Result	nx	reading.date	reading.time	sbp	dbp	day	minutes	time	res.sbp	res.dbp	dtime	dsbp	ddbp	sbp.bi	dbp.bi
dongo31_박수연	1	2007-12-04	10:49:00	137	79	0	649	649	-8.75632	-9.37938	NA	NA	NA	1	0
dongo31_박수연	2	2007-12-04	19:50:00	150	88	0	1190	1190	5.83049	0.0934492	541	13	9	1	1
dongo31_박수연	3	2007-12-04	23:45:00	163	96	0	1425	1425	19.5198	8.29884	235	13	8	1	1
dongo31_박수연	4	2007-12-05	07:08:00	138	95	1	428	1868	-4.18086	7.68602	443	-25	-1	1	1
dongo31_박수연	5	2007-12-05	09:34:00	136	84	1	574	2014	-5.75263	-3.18637	146	-2	-11	1	0
dongo31_박수연	6	2007-12-06	07:20:00	133	84	2	440	3320	-4.92199	-2.04493	1306	-3	0	0	0
dongo31_박수연	7	2007-12-06	09:14:00	138	88	2	554	3434	0.41238	2.05471	114	5	4	1	1
dongo31_박수연	8	2007-12-06	18:21:00	128	78	2	1101	3981	-7.98321	-7.46722	547	-10	-10	0	0
dongo31_박수연	9	2007-12-06	23:51:00	143	85	2	1431	4311	7.98471	-0.178797	330	15	7	1	1
dongo31_박수연	10	2007-12-07	07:35:00	123	80	3	455	4775	-10.6543	-4.77326	464	-20	-5	0	0
dongo31_박수연	11	2007-12-07	20:22:00	147	92	3	1222	5542	15.5954	7.8971	767	24	12	1	1
dongo31_박수연	12	2007-12-07	21:57:00	133	93	3	1317	5637	1.87401	8.98013	95	-14	1	0	1
dongo31_박수연	13	2007-12-08	08:33:00	116	77	4	513	6273	-13.2605	-6.46401	636	-17	-16	0	0
dongo31_박수연	14	2007-12-09	20:09:00	121	82	5	1209	8409	-1.99542	0.402856	2136	5	5	0	0
dongo31_박수연	15	2007-12-10	07:21:00	133	84	6	441	9081	11.9756	2.99018	672	12	2	0	0
dongo31_박수연	16	2007-12-10	09:16:00	115	76	6	556	9196	-5.68707	-4.90931	115	-18	-8	0	0
Result	nx	reading.date	reading.time	sbp	dbp	day	minutes	time	res.sbp	res.dbp	dtime	dsbp	ddbp	sbp.bi	dbp.bi
dongo32_박점선	1	2007-11-06	06:19:00	131	83	0	379	379	0.34248	2.73783	NA	NA	NA	0	0
dongo32_박점선	2	2007-11-06	18:41:00	130	78	0	1121	1121	-2.57518	-3.29789	742	-1	-5	0	0
dongo32_박점선	3	2007-11-07	07:01:00	140	88	1	421	1861	5.51233	5.66918	740	10	10	1	1
dongo32_박점선	4	2007-11-07	19:27:00	138	84	1	1167	2607	1.58433	0.627871	746	-2	-4	1	0
dongo32_박점선	5	2007-11-07	21:39:00	135	85	1	1299	2739	-1.75681	1.44362	132	-3	1	1	1
dongo32_박점선	6	2007-11-08	21:32:00	128	68	2	1292	4172	-12.4603	-17.5566	1433	-7	-17	0	0
dongo32_박점선	7	2007-11-09	07:43:00	147	92	3	463	4783	4.96058	5.59049	611	19	24	1	1
dongo32_박점선	8	2007-11-10	05:14:00	152	95	4	314	6074	6.62406	6.78844	1291	5	3	1	1
dongo32_박점선	9	2007-11-10	06:43:00	145	85	4	403	6163	-0.605959	-3.33579	89	-7	-10	1	1
dongo32_박점선	10	2007-11-12	10:26:00	152	94	6	626	9266	-1.6255	1.33288	3103	7	9	1	1
Result	nx	reading.date	reading.time	sbp	dbp	day	minutes	time	res.sbp	res.dbp	dtime	dsbp	ddbp	sbp.bi	dbp.bi
dongo33_박찬갑	1	2007-11-15	06:53:00	128	80	0	413	413	-5.95166	-7.97322	NA	NA	NA	0	0
dongo33_박찬갑	2	2007-11-16	07:29:00	156	86	1	449	1889	22.9382	-1.80961	1476	28	6	1	1
dongo33_박찬갑	3	2007-11-16	08:26:00	128	80	1	506	1946	-5.02745	-7.80329	57	-28	-6	0	0
dongo33_박찬갑	4	2007-11-17	08:09:00	136	87	2	489	3369	3.83045	-0.645553	1423	8	7	1	1
dongo33_박찬갑	5	2007-11-17	09:05:00	141	90	2	545	3425	8.86421	2.36065	56	5	3	1	1
dongo33_박찬갑	6	2007-11-17	19:18:00	112	84	2	1158	4038	-19.7662	-3.5714	613	-29	-6	0	0
dongo33_박찬갑	7	2007-11-18	07:40:00	132	81	3	460	4780	0.681109	-6.48915	742	20	-3	0	0
dongo33_박찬갑	8	2007-11-19	09:34:00	156	143	4	574	6334	25.618	55.6831	1554	24	62	1	1
dongo33_박찬갑	9	2007-11-19	19:18:00	125	86	4	1158	6918	-5.02994	-1.25215	584	-31	-57	0	1
dongo33_박찬갑	10	2007-11-19	19:20:00	122	84	4	1160	6920	-8.02873	-3.25193	2	-3	-2	0	0
dongo33_박찬갑	11	2007-11-21	07:38:00	111	84	6	458	9098	-17.7157	-3.01051	2178	-11	0	0	0
dongo33_박찬갑	12	2007-11-21	09:45:00	120	89	6	585	9225	-8.6391	2.00357	127	9	5	0	1
dongo33_박찬갑	13	2007-11-21	15:44:00	130	89	6	944	9584	1.57733	2.04337	359	10	0	0	1
dongo33_박찬갑	14	2007-11-21	19:55:00	121	83	6	1195	9835	-7.27134	-3.92881	251	-9	-6	0	0
dongo33_박찬갑	15	2007-11-22	07:40:00	132	80	7	460	10540	4.15369	-6.85066	705	11	-3	0	0
dongo33_박찬갑	16	2007-11-22	17:03:00	133	82	7	1023	11103	5.49311	-4.78826	563	1	2	0	0
dongo33_박찬갑	17	2007-11-22	18:52:00	139	86	7	1132	11212	11.5588	-0.776173	109	6	4	1	1
dongo33_박찬갑	18	2007-11-23	07:28:00	112	83	8	448	11968	-14.9854	-3.69237	756	-27	-3	0	0
dongo33_박찬갑	19	2007-11-23	09:33:00	110	72	8	573	12093	-16.91	-14.6785	125	-2	-11	0	0
dongo33_박찬갑	20	2007-11-23	20:24:00	136	86	8	1224	12744	9.48243	-0.606354	651	26	14	1	1
dongo33_박찬갑	21	2007-11-24	07:33:00	122	86	9	453	13413	-4.11425	-0.532196	669	-14	0	0	1
dongo33_박찬갑	22	2007-11-24	19:06:00	139	90	9	1146	14106	13.3035	3.54462	693	17	4	1	1
dongo33_박찬갑	23	2007-11-24	19:07:00	112	87	9	1147	14107	-13.6958	0.544732	1	-27	-3	0	1
dongo33_박찬갑	24	2007-11-25	08:39:00	125	89	10	519	14919	-0.206312	2.63474	812	13	2	0	1
dongo33_박찬갑	25	2007-11-25	08:41:00	125	88	10	521	14921	-0.205106	1.63496	2	0	-1	0	1
dongo33_박찬갑	26	2007-11-25	19:35:00	124	88	10	1175	15575	-0.810824	1.70746	654	-1	0	0	1
dongo33_박찬갑	27	2007-11-25	19:36:00	132	88	10	1176	15576	7.18978	1.70757	1	8	0	0	1
dongo33_박찬갑	28	2007-11-26	08:48:00	138	84	11	528	16368	13.6673	-2.20464	792	6	-4	1	0
Result	nx	reading.date	reading.time	sbp	dbp	day	minutes	time	res.sbp	res.dbp	dtime	dsbp	ddbp	sbp.bi	dbp.bi
dongo34_박태성	1	2007-11-05	19:07:00	145	102	0	1147	1147	-0.431032	2.37838	NA	NA	NA	1	1
dongo34_박태성	2	2007-11-05	22:09:00	124	88	0	1329	1329	-21.3696	-11.4766	182	-21	-14	0	1
dongo34_박태성	3	2007-11-06	04:47:00	144	91	1	287	1727	-1.23518	-8.15938	398	20	3	1	1
dongo34_박태성	4	2007-11-06	08:26:00	144	92	1	506	1946	-1.16123	-6.98485	219	0	1	1	1
dongo34_박태성	5	2007-11-06	20:10:00	136	87	1	1210	2650	-8.9235	-11.4238	704	-8	-5	1	1
dongo34_박태성	6	2007-11-06	21:32:00	140	96	1	1292	2732	-4.89581	-2.35844	82	4	9	1	1
dongo34_박태성	7	2007-11-07	06:15:00	152	104	2	375	3255	7.28079	6.05837	523	12	8	1	1
dongo34_박태성	8	2007-11-07	09:02:00	151	106	2	542	3422	6.33718	8.19147	167	-1	2	1	1
dongo34_박태성	9	2007-11-07	20:56:00	148	108	2	1256	4136	3.57829	10.7605	714	-3	2	1	1
dongo34_박태성	10	2007-11-07	22:37:00	148	100	2	1357	4237	3.61239	2.84099	101	0	-8	1	1
dongo34_박태성	11	2007-11-08	07:51:00	165	104	3	471	4791	20.7995	7.28251	554	17	4	1	1
dongo34_박태성	12	2007-11-08	19:54:00	140	115	3	1194	5514	-3.95639	18.8587	723	-25	11	1	1
dongo34_박태성	13	2007-11-08	21:26:00	144	100	3	1286	5606	0.0746729	3.93203	92	4	-15	1	1
dongo34_박태성	14	2007-11-09	08:21:00	160	113	4	501	6261	16.2959	17.454	655	16	13	1	1
dongo34_박태성	15	2007-11-09	17:57:00	146	68	4	1077	6837	2.49035	-27.0869	576	-14	-45	1	0
dongo34_박태성	16	2007-11-12	14:13:00	149	92	7	853	10933	6.87348	0.177454	4096	3	24	1	1
dongo34_박태성	17	2007-11-12	14:18:00	137	92	7	858	10938	-5.12483	0.181438	5	-12	0	1	1
dongo34_박태성	18	2007-11-12	14:25:00	136	82	7	865	10945	-6.12247	-9.81298	7	-1	-10	1	0
dongo34_박태성	19	2007-11-12	14:25:00	128	91	7	865	10945	-14.1225	-0.812983	0	-8	9	0	1
Result	nx	reading.date	reading.time	sbp	dbp	day	minutes	time	res.sbp	res.dbp	dtime	dsbp	ddbp	sbp.bi	dbp.bi
dongo35_박해룡	1	2007-11-20	17:57:00	144	90	0	1077	1077	7.2068	4.10635	NA	NA	NA	1	1
dongo35_박해룡	2	2007-11-20	21:30:00	137	77	0	1290	1290	0.444602	-8.73992	213	-7	-13	1	0
dongo35_박해룡	3	2007-11-21	07:02:00	141	92	1	422	1862	5.08321	6.67294	572	4	15	1	1
dongo35_박해룡	4	2007-11-21	09:36:00	125	78	1	576	2016	-10.7449	-7.21591	154	-16	-14	0	0
dongo35_박해룡	5	2007-11-21	18:05:00	138	84	1	1085	2525	2.82342	-0.848533	509	13	6	1	0
dongo35_박해룡	6	2007-11-21	21:09:00	116	76	1	1269	2709	-18.9712	-8.71573	184	-22	-8	0	0
dongo35_박해룡	7	2007-11-22	07:02:00	123	80	2	422	3302	-11.3091	-4.28772	593	7	4	0	0
dongo35_박해룡	8	2007-11-22	09:13:00	126	80	2	553	3433	-8.16285	-4.19317	131	3	0	0	0
dongo35_박해룡	9	2007-11-24	07:19:00	153	93	4	439	6199	21.9253	10.8032	2766	27	13	1	1
dongo35_박해룡	10	2007-11-24	09:14:00	146	85	4	554	6314	15.0536	2.88624	115	-7	-8	1	1
dongo35_박해룡	11	2007-11-24	18:28:00	128	81	4	1108	6868	-2.32784	-0.713897	554	-18	-4	0	0
dongo35_박해룡	12	2007-11-24	20:29:00	119	77	4	1229	6989	-11.1927	-4.62656	121	-9	-4	0	0
dongo35_박해룡	13	2007-11-25	07:08:00	140	87	5	428	7628	10.5207	5.83465	639	21	10	1	1
dongo35_박해룡	14	2007-11-25	13:31:00	149	97	5	811	8011	19.9483	16.1111	383	9	10	1	1
dongo35_박해룡	15	2007-11-25	18:12:00	131	84	5	1092	8292	2.26198	3.3139	281	-18	-13	0	0
dongo35_박해룡	16	2007-11-25	21:22:00	133	91	5	1282	8482	4.47411	10.451	190	2	7	0	1
dongo35_박해룡	17	2007-11-27	11:21:00	119	80	7	681	10761	-6.9815	1.09594	2279	-14	-11	0	0
dongo35_박해룡	18	2007-11-27	23:19:00	126	76	7	1399	11479	0.820111	-2.38583	718	7	-4	0	0
dongo35_박해룡	19	2007-11-28	00:03:00	117	71	8	3	11523	-8.13077	-7.35407	44	-9	-5	0	0
dongo35_박해룡	20	2007-11-28	07:18:00	118	76	8	438	11958	-6.64511	-2.0401	435	1	5	0	0
dongo35_박해룡	21	2007-11-28	14:24:00	130	68	8	864	12384	5.8305	-9.73263	426	12	-8	0	0
dongo35_박해룡	22	2007-11-28	20:09:00	121	74	8	1209	12729	-2.78433	-3.48362	345	-9	6	0	0
dongo35_박해룡	23	2007-11-29	12:06:00	120	82	9	726	13686	-2.71588	5.20711	957	-1	8	0	0
dongo35_박해룡	24	2007-11-29	19:22:00	115	78	9	1162	14122	-7.22911	1.5218	436	-5	-4	0	0
dongo35_박해룡	25	2007-11-30	10:24:00	121	73	10	624	15024	-0.222074	-2.82716	902	6	-5	0	0
dongo35_박해룡	26	2007-11-30	21:02:00	122	73	10	1262	15662	1.49022	-2.36667	638	1	0	0	0
dongo35_박해룡	27	2007-11-30	23:32:00	119	84	10	1412	15812	-1.34231	8.74159	150	-3	11	0	0
dongo35_박해룡	28	2007-12-01	10:58:00	116	77	11	658	16498	-3.57643	2.23672	686	-3	-7	0	0
dongo35_박해룡	29	2007-12-02	17:16:00	122	64	12	1036	18316	4.45328	-9.4511	1818	6	-13	0	0
Result	nx	reading.date	reading.time	sbp	dbp	day	minutes	time	res.sbp	res.dbp	dtime	dsbp	ddbp	sbp.bi	dbp.bi
dongo36_방명숙	1	2007-10-03	06:31:00	118	89	0	391	391	-0.603328	3.57799	NA	NA	NA	0	1
dongo36_방명숙	2	2007-10-03	18:51:00	116	88	0	1131	1131	-1.73761	2.94905	740	-2	-1	0	1
dongo36_방명숙	3	2007-10-03	20:37:00	121	90	0	1237	1237	3.3864	5.00221	106	5	2	0	1
dongo36_방명숙	4	2007-10-04	06:56:00	112	81	1	416	1856	-4.88943	-3.6874	619	-9	-9	0	0
dongo36_방명숙	5	2007-10-04	08:25:00	126	82	1	505	1945	9.21469	-2.64278	89	14	1	0	0
dongo36_방명숙	6	2007-10-04	18:46:00	117	82	1	1126	2566	0.941191	-2.33138	621	-9	0	0	0
dongo36_방명숙	7	2007-10-05	06:52:00	108	82	2	412	3292	-7.20947	-1.96734	726	-9	0	0	0
dongo36_방명숙	8	2007-10-05	13:27:00	119	85	2	807	3687	4.25264	1.23073	395	11	3	0	1
dongo36_방명숙	9	2007-10-05	19:19:00	116	82	2	1159	4039	1.66444	-1.59277	352	-3	-3	0	0
dongo36_방명숙	10	2007-10-06	07:21:00	104	74	3	441	4761	-9.49089	-9.23073	722	-12	-8	0	0
dongo36_방명숙	11	2007-10-06	21:28:00	112	83	3	1288	5608	-0.499993	0.193985	847	8	9	0	0
dongo36_방명숙	12	2007-10-07	06:54:00	114	86	4	414	6174	2.16217	3.4778	566	2	3	0	1
dongo36_방명숙	13	2007-10-07	18:45:00	109	84	4	1125	6885	-2.00604	1.83432	711	-5	-2	0	0
dongo36_방명숙	14	2007-10-08	06:27:00	115	85	5	387	7587	4.81523	3.18633	702	6	1	0	1
Result	nx	reading.date	reading.time	sbp	dbp	day	minutes	time	res.sbp	res.dbp	dtime	dsbp	ddbp	sbp.bi	dbp.bi
dongo37_서만향	1	2007-12-13	17:13:00	108	70	0	1033	1033	-13.5581	-11.094	NA	NA	NA	0	0
dongo37_서만향	2	2007-12-13	19:17:00	133	100	0	1157	1157	11.3552	18.8185	124	25	30	0	1
dongo37_서만향	3	2007-12-13	19:19:00	130	85	0	1159	1159	8.35382	3.81711	2	-3	-15	0	1
dongo37_서만향	4	2007-12-13	19:58:00	112	72	0	1198	1198	-9.67344	-9.21041	39	-18	-13	0	0
dongo37_서만향	5	2007-12-14	08:34:00	140	76	1	514	1954	17.7981	-5.7438	756	28	4	1	0
dongo37_서만향	6	2007-12-14	18:28:00	134	82	1	1108	2548	11.383	-0.162899	594	-6	6	0	0
dongo37_서만향	7	2007-12-14	18:32:00	122	112	1	1112	2552	-0.61983	29.8343	4	-12	30	0	1
dongo37_서만향	8	2007-12-15	07:23:00	140	87	2	443	3323	16.8413	4.2903	771	18	-25	1	1
dongo37_서만향	9	2007-12-15	19:23:00	132	84	2	1163	4043	8.33802	0.782303	720	-8	-3	0	0
dongo37_서만향	10	2007-12-16	08:46:00	135	90	3	526	4846	10.7768	6.21575	803	3	6	1	1
dongo37_서만향	11	2007-12-16	08:49:00	124	80	3	529	4849	-0.225342	-3.78637	3	-11	-10	0	0
dongo37_서만향	12	2007-12-16	09:12:00	110	77	3	552	4872	-14.2414	-6.8026	23	-14	-3	0	0
dongo37_서만향	13	2007-12-16	09:14:00	102	74	3	554	4874	-22.2428	-9.80401	2	-8	-3	0	0
dongo37_서만향	14	2007-12-16	09:16:00	119	78	3	556	4876	-5.24421	-5.80542	2	17	4	0	0
dongo37_서만향	15	2007-12-16	17:58:00	111	89	3	1078	5398	-13.6091	4.82628	522	-8	11	0	1
dongo37_서만향	16	2007-12-16	18:00:00	112	83	3	1080	5400	-12.6105	-1.17513	2	1	-6	0	0
dongo37_서만향	17	2007-12-16	18:04:00	92	49	3	1084	5404	-32.6133	-35.178	4	-20	-34	0	0
dongo37_서만향	18	2007-12-17	08:02:00	139	91	4	482	6242	13.801	6.2308	838	47	42	1	1
dongo37_서만향	19	2007-12-17	08:04:00	117	77	4	484	6244	-8.20039	-7.77061	2	-22	-14	0	0
dongo37_서만향	20	2007-12-17	08:06:00	134	94	4	486	6246	8.79821	9.22798	2	17	17	0	1
dongo37_서만향	21	2007-12-17	08:08:00	113	79	4	488	6248	-12.2032	-5.77344	2	-21	-15	0	0
dongo37_서만향	22	2007-12-17	10:48:00	126	89	4	648	6408	0.684978	4.11368	160	13	10	0	1
dongo37_서만향	23	2007-12-17	18:34:00	146	90	4	1114	6874	20.3593	4.78489	466	20	1	1	1
dongo37_서만향	24	2007-12-17	18:36:00	124	92	4	1116	6876	-1.64214	6.78348	2	-22	2	0	1
dongo37_서만향	25	2007-12-18	08:45:00	136	88	5	525	7725	9.76445	2.18447	849	12	-4	1	1
dongo37_서만향	26	2007-12-18	08:47:00	123	80	5	527	7727	-3.23695	-5.81695	2	-13	-8	0	0
dongo37_서만향	27	2007-12-18	08:49:00	130	88	5	529	7729	3.76165	2.18164	2	7	8	0	1
dongo37_서만향	28	2007-12-18	11:18:00	145	84	5	678	7878	18.6575	-1.92348	149	15	-4	1	0
dongo37_서만향	29	2007-12-18	20:04:00	117	72	5	1204	8404	-9.71015	-14.2946	526	-28	-12	0	0
dongo37_서만향	30	2007-12-18	20:06:00	111	84	5	1206	8406	-15.7115	-2.29601	2	-6	12	0	0
dongo37_서만향	31	2007-12-18	20:08:00	96	60	5	1208	8408	-30.7129	-26.2974	2	-15	-24	0	0
dongo37_서만향	32	2007-12-19	09:01:00	127	89	6	541	9181	-0.25324	2.15718	773	31	29	0	1
dongo37_서만향	33	2007-12-19	09:03:00	110	63	6	543	9183	-17.2546	-23.8442	2	-17	-26	0	0
dongo37_서만향	34	2007-12-19	09:05:00	120	90	6	545	9185	-7.25604	3.15436	2	10	27	0	1
dongo37_서만향	35	2007-12-19	09:44:00	172	144	6	584	9224	44.7167	57.1268	39	52	54	1	1
dongo37_서만향	36	2007-12-19	09:46:00	145	96	6	586	9226	17.7153	9.12543	2	-27	-48	1	1
dongo37_서만향	37	2007-12-19	09:48:00	135	88	6	588	9228	7.71391	1.12402	2	-10	-8	1	1
Result	nx	reading.date	reading.time	sbp	dbp	day	minutes	time	res.sbp	res.dbp	dtime	dsbp	ddbp	sbp.bi	dbp.bi
dongo38_서명숙	1	2007-12-06	16:14:00	110	62	0	974	974	-23.02	-11.5434	NA	NA	NA	0	0
dongo38_서명숙	2	2007-12-06	22:20:00	136	77	0	1340	1340	2.05461	3.01285	366	26	15	1	0
dongo38_서명숙	3	2007-12-06	22:21:00	125	71	0	1341	1341	-8.94792	-2.98836	1	-11	-6	0	0
dongo38_서명숙	4	2007-12-06	22:23:00	128	72	0	1343	1343	-5.95298	-1.99078	2	3	1	0	0
dongo38_서명숙	5	2007-12-07	06:16:00	138	74	1	376	1816	2.85112	-0.564304	473	10	2	1	0
dongo38_서명숙	6	2007-12-07	07:56:00	148	78	1	476	1916	12.5983	3.31445	100	10	4	1	0
dongo38_서명숙	7	2007-12-07	22:02:00	141	73	1	1322	2762	3.45931	-2.71134	846	-7	-5	1	0
dongo38_서명숙	8	2007-12-08	07:25:00	160	94	2	445	3325	21.0359	17.606	563	19	21	1	1
dongo38_서명숙	9	2007-12-08	08:33:00	148	79	2	513	3393	8.86393	2.52356	68	-12	-15	1	0
dongo38_서명숙	10	2007-12-11	07:47:00	137	75	5	467	7667	-12.9422	-6.65872	4274	-11	-4	1	0
Result	nx	reading.date	reading.time	sbp	dbp	day	minutes	time	res.sbp	res.dbp	dtime	dsbp	ddbp	sbp.bi	dbp.bi
dongo39_서순례	1	2007-09-17	21:07:00	104	60	0	1267	1267	-3.29578	-0.864339	NA	NA	NA	0	0
dongo39_서순례	2	2007-09-17	21:11:00	105	61	0	1271	1271	-2.29833	0.133269	4	1	1	0	0
dongo39_서순례	3	2007-09-18	11:16:00	109	60	1	676	2116	1.16362	-1.37201	845	4	-1	0	0
dongo39_서순례	4	2007-09-18	11:18:00	118	64	1	678	2118	10.1623	2.6268	2	9	4	0	0
dongo39_서순례	5	2007-09-18	20:48:00	97	60	1	1248	2688	-11.2006	-1.71404	570	-21	-4	0	0
dongo39_서순례	6	2007-09-18	20:50:00	100	57	1	1250	2690	-8.20187	-4.71524	2	3	-3	0	0
dongo39_서순례	7	2007-09-19	08:35:00	116	65	2	515	3395	7.34922	2.8632	705	16	8	0	0
dongo39_서순례	8	2007-09-19	08:38:00	109	65	2	518	3398	0.347313	2.86141	3	-7	0	0	0
dongo39_서순례	9	2007-09-19	21:17:00	120	64	2	1277	4157	10.864	1.40756	759	11	-1	0	0
dongo39_서순례	10	2007-09-19	21:18:00	115	64	2	1278	4158	5.86339	1.40696	1	-5	0	0	0
dongo39_서순례	11	2007-09-20	21:23:00	114	63	3	1283	5603	3.94329	-0.457093	1445	-1	-1	0	0
dongo39_서순례	12	2007-09-20	21:24:00	109	62	3	1284	5604	-1.05735	-1.45769	1	-5	-1	0	0
dongo39_서순례	13	2007-09-21	08:36:00	100	65	4	516	6276	-10.4852	1.14048	672	-9	3	0	0
dongo39_서순례	14	2007-09-21	08:39:00	104	61	4	519	6279	-6.48715	-2.86131	3	4	-4	0	0
dongo39_서순례	15	2007-09-21	20:21:00	107	66	4	1221	6981	-3.93415	1.71892	702	3	5	0	0
dongo39_서순례	16	2007-09-21	20:23:00	109	65	4	1223	6983	-1.93542	0.717722	2	2	-1	0	0
dongo39_서순례	17	2007-09-22	08:30:00	116	64	5	510	7710	4.60166	-0.716995	727	7	-1	0	0
dongo39_서순례	18	2007-09-22	08:31:00	116	64	5	511	7711	4.60103	-0.717593	1	0	0	0	0
Result	nx	reading.date	reading.time	sbp	dbp	day	minutes	time	res.sbp	res.dbp	dtime	dsbp	ddbp	sbp.bi	dbp.bi
dongo40_송재수	1	2007-11-02	19:02:00	112	75	0	1142	1142	7.68537	10.6832	NA	NA	NA	0	0
dongo40_송재수	2	2007-11-02	20:19:00	96	52	0	1219	1219	-8.44829	-12.3422	77	-16	-23	0	0
dongo40_송재수	3	2007-11-03	07:00:00	101	67	1	420	1860	-4.56095	2.44611	641	5	15	0	0
dongo40_송재수	4	2007-11-03	07:25:00	113	65	1	445	1885	7.39566	0.437855	25	12	-2	0	0
dongo40_송재수	5	2007-11-03	21:25:00	112	64	1	1285	2725	4.93757	-0.83956	840	-1	-1	0	0
dongo40_송재수	6	2007-11-03	22:17:00	103	66	1	1337	2777	-4.15269	1.14327	52	-9	2	0	0
dongo40_송재수	7	2007-11-04	06:57:00	108	76	2	417	3297	-0.0553129	10.9715	520	5	10	0	0
dongo40_송재수	8	2007-11-04	17:14:00	100	56	2	1034	3914	-9.12631	-9.23223	617	-8	-20	0	0
dongo40_송재수	9	2007-11-04	19:29:00	110	70	2	1169	4049	0.639355	4.72318	135	10	14	0	0
dongo40_송재수	10	2007-11-04	21:05:00	115	67	2	1265	4145	5.47272	1.69148	96	5	-3	0	0
dongo40_송재수	11	2007-11-05	07:09:00	104	60	3	429	4749	-6.57572	-5.508	604	-11	-7	0	0
dongo40_송재수	12	2007-11-05	07:31:00	114	59	3	451	4771	3.3861	-6.51526	22	10	-1	0	0
dongo40_송재수	13	2007-11-05	19:34:00	112	67	3	1174	5494	0.131103	1.24596	723	-2	8	0	0
dongo40_송재수	14	2007-11-05	20:58:00	119	64	3	1258	5578	6.98529	-1.78178	84	7	-3	0	0
dongo40_송재수	15	2007-11-06	07:11:00	108	64	4	431	6191	-5.07876	-1.98423	613	-11	0	0	0
dongo40_송재수	16	2007-11-06	07:26:00	113	62	4	446	6206	-0.104796	-3.98918	15	5	-2	0	0
dongo40_송재수	17	2007-11-06	19:13:00	113	66	4	1153	6913	-1.33202	-0.222671	707	0	4	0	0
dongo40_송재수	18	2007-11-07	07:15:00	114	72	5	435	7635	-1.58527	5.53888	722	1	6	0	0
dongo40_송재수	19	2007-11-07	07:31:00	120	70	5	451	7651	4.38695	3.5336	16	6	-2	0	0
Result	nx	reading.date	reading.time	sbp	dbp	day	minutes	time	res.sbp	res.dbp	dtime	dsbp	ddbp	sbp.bi	dbp.bi
dongo41_신남순	1	2007-10-18	20:04:00	150	74	0	1204	1204	12.3354	8.25212	NA	NA	NA	1	0
dongo41_신남순	2	2007-10-18	21:17:00	136	60	0	1277	1277	-2.0343	-5.80858	73	-14	-14	1	0
dongo41_신남순	3	2007-10-18	21:19:00	126	62	0	1279	1279	-12.0444	-3.81024	2	-10	2	0	0
dongo41_신남순	4	2007-10-19	06:33:00	143	69	1	393	1833	2.1502	2.72909	554	17	7	1	0
dongo41_신남순	5	2007-10-19	08:23:00	141	65	1	503	1943	-0.40682	-1.36238	110	-2	-4	1	0
Result	nx	reading.date	reading.time	sbp	dbp	day	minutes	time	res.sbp	res.dbp	dtime	dsbp	ddbp	sbp.bi	dbp.bi
dongo42_신미순	1	2007-09-27	17:38:00	125	75	0	1058	1058	1.66482	-5.84755	NA	NA	NA	0	0
dongo42_신미순	2	2007-09-27	23:21:00	110	73	0	1401	1401	-12.8089	-7.24674	343	-15	-2	0	0
dongo42_신미순	3	2007-09-28	10:10:00	129	81	1	610	2050	7.18696	1.89008	649	19	8	0	0
dongo42_신미순	4	2007-09-28	10:11:00	130	83	1	611	2051	8.18849	3.89183	1	1	2	0	0
dongo42_신미순	5	2007-09-28	21:08:00	121	81	1	1268	2708	0.196604	3.04265	657	-9	-2	0	0
dongo42_신미순	6	2007-09-29	08:54:00	112	72	2	534	3414	-7.7201	-4.72069	706	-9	-9	0	0
dongo42_신미순	7	2007-09-29	08:56:00	121	84	2	536	3416	1.28297	7.28281	2	9	12	0	0
dongo42_신미순	8	2007-09-29	09:14:00	122	83	2	554	3434	2.31059	6.31434	18	1	-1	0	0
dongo42_신미순	9	2007-09-29	21:43:00	123	80	2	1303	4183	4.45986	4.62632	749	1	-3	0	0
dongo42_신미순	10	2007-09-29	23:21:00	126	81	2	1401	4281	7.61024	5.79798	98	3	1	0	0
dongo42_신미순	11	2007-09-30	09:53:00	111	65	3	593	4913	-6.42001	-9.09498	632	-15	-16	0	0
dongo42_신미순	12	2007-09-30	11:05:00	102	60	3	665	4985	-15.3095	-13.9689	72	-9	-5	0	0
dongo42_신미순	13	2007-09-30	20:02:00	122	79	3	1202	5522	5.51444	5.97176	537	20	19	0	0
dongo42_신미순	14	2007-09-30	23:25:00	120	78	3	1405	5725	3.82593	5.32735	203	-2	-1	0	0
dongo42_신미순	15	2007-10-01	07:04:00	110	72	4	424	6184	-5.46977	0.131347	459	-10	-6	0	0
dongo42_신미순	16	2007-10-01	08:54:00	123	77	4	534	6294	7.69901	5.32403	110	13	5	0	0
dongo42_신미순	17	2007-10-01	21:28:00	107	64	4	1288	7048	-7.14404	-6.35524	754	-16	-13	0	0
dongo42_신미순	18	2007-10-02	00:02:00	114	68	5	2	7202	0.0922595	-2.08549	154	7	4	0	0
dongo42_신미순	19	2007-10-02	08:45:00	115	65	5	525	7725	1.89476	-4.16938	523	1	-3	0	0
dongo42_신미순	20	2007-10-02	09:18:00	116	73	5	558	7758	2.94539	3.88842	33	1	8	0	0
Result	nx	reading.date	reading.time	sbp	dbp	day	minutes	time	res.sbp	res.dbp	dtime	dsbp	ddbp	sbp.bi	dbp.bi
dongo43_신민하	1	2007-11-03	08:06:00	115	86	0	486	486	-5.08002	5.07549	NA	NA	NA	0	1
dongo43_신민하	2	2007-11-03	12:55:00	127	85	0	775	775	6.79955	4.12752	289	12	-1	0	1
dongo43_신민하	3	2007-11-03	12:57:00	123	91	0	777	777	2.79871	10.1279	2	-4	6	0	1
dongo43_신민하	4	2007-11-03	14:29:00	120	80	0	869	869	-0.239627	-0.855558	92	-3	-11	0	0
dongo43_신민하	5	2007-11-03	17:44:00	124	89	0	1064	1064	3.67911	8.17955	195	4	9	0	1
dongo43_신민하	6	2007-11-03	22:34:00	121	73	0	1354	1354	0.558255	-7.76825	290	-3	-16	0	0
dongo43_신민하	7	2007-11-04	17:00:00	124	88	1	1020	2460	3.09734	7.43085	1106	3	15	0	1
dongo43_신민하	8	2007-11-04	17:31:00	119	80	1	1051	2491	-1.91558	-0.563565	31	-5	-8	0	0
dongo43_신민하	9	2007-11-04	21:38:00	116	80	1	1298	2738	-5.01851	-0.5191	247	-3	0	0	0
dongo43_신민하	10	2007-11-05	00:05:00	110	72	2	5	2885	-11.0798	-8.49264	147	-6	-8	0	0
dongo43_신민하	11	2007-11-05	08:56:00	119	86	2	536	3416	-2.30106	5.60295	531	9	14	0	1
dongo43_신민하	12	2007-11-05	15:12:00	135	84	2	912	3792	13.5422	3.67064	376	16	-2	1	0
dongo43_신민하	13	2007-11-08	09:24:00	132	84	5	564	7764	8.88697	4.38568	3972	-3	0	0	0
dongo43_신민하	14	2007-11-08	11:39:00	136	82	5	699	7899	12.8307	2.40999	135	4	-2	1	0
dongo43_신민하	15	2007-11-08	12:46:00	126	86	5	766	7966	2.80279	6.42205	67	-10	4	0	1
dongo43_신민하	16	2007-11-09	00:33:00	106	56	6	33	8673	-17.4918	-23.4507	707	-20	-30	0	0
dongo43_신민하	17	2007-11-09	00:35:00	105	52	6	35	8675	-18.4927	-27.4503	2	-1	-4	0	0
dongo43_신민하	18	2007-11-09	11:23:00	124	75	6	683	9323	0.237275	-4.33366	648	19	23	0	0
dongo43_신민하	19	2007-11-09	21:25:00	115	68	6	1285	9925	-9.0136	-11.2253	602	-9	-7	0	0
dongo43_신민하	20	2007-11-09	21:27:00	118	60	6	1287	9927	-6.01443	-19.2249	2	3	-8	0	0
dongo43_신민하	21	2007-11-10	08:54:00	123	87	7	534	10614	-1.30073	7.89874	687	5	27	0	1
dongo43_신민하	22	2007-11-10	09:19:00	129	85	7	559	10639	4.68885	5.90324	25	6	-2	0	1
dongo43_신민하	23	2007-11-11	14:58:00	144	87	8	898	12418	18.9475	8.2235	1779	15	2	1	1
dongo43_신민하	24	2007-11-13	11:28:00	130	88	10	688	15088	3.83478	9.70415	2670	-14	1	0	1
dongo43_신민하	25	2007-11-13	14:43:00	122	78	10	883	15283	-4.24648	-0.260743	195	-8	-10	0	0
dongo43_신민하	26	2007-11-13	14:46:00	124	80	10	886	15286	-2.24773	1.7398	3	2	2	0	0
dongo43_신민하	27	2007-11-14	19:49:00	133	89	11	1189	17029	6.0259	11.0536	1743	9	9	0	1
dongo43_신민하	28	2007-11-15	08:22:00	123	80	12	502	17782	-4.28791	2.18913	753	-10	-9	0	0
Result	nx	reading.date	reading.time	sbp	dbp	day	minutes	time	res.sbp	res.dbp	dtime	dsbp	ddbp	sbp.bi	dbp.bi
dongo44_신청자	1	2007-11-29	22:28:00	136	72	0	1348	1348	2.98904	-1.86012	NA	NA	NA	1	0
dongo44_신청자	2	2007-11-30	17:11:00	135	75	1	1031	2471	1.11437	-0.0910608	1123	-1	3	1	0
dongo44_신청자	3	2007-12-01	06:38:00	132	74	2	398	3278	-2.51418	-1.97563	807	-3	-1	0	0
dongo44_신청자	4	2007-12-01	12:48:00	133	75	2	768	3648	-1.80236	-1.3812	370	1	1	0	0
dongo44_신청자	5	2007-12-01	16:33:00	135	76	2	993	3873	0.0223966	-0.627824	225	2	1	1	0
dongo44_신청자	6	2007-12-01	20:58:00	138	80	2	1258	4138	2.816	3.0817	265	3	4	1	0
dongo44_신청자	7	2007-12-02	06:19:00	140	79	3	379	4699	4.37905	1.46678	561	2	-1	1	0
dongo44_신청자	8	2007-12-02	06:20:00	124	76	3	380	4700	-11.6217	-1.53432	1	-16	-3	0	0
dongo44_신청자	9	2007-12-02	11:42:00	151	85	3	702	5022	15.1275	7.11273	322	27	9	1	1
dongo44_신청자	10	2007-12-02	20:58:00	124	76	3	1258	5578	-12.3056	-2.49671	556	-27	-9	0	0
dongo44_신청자	11	2007-12-03	13:25:00	146	82	4	805	6565	8.92568	2.42142	987	22	6	1	0
dongo44_신청자	12	2007-12-03	21:08:00	128	82	4	1268	7028	-9.43494	1.91391	463	-18	0	0	0
dongo44_신청자	13	2007-12-04	10:21:00	128	72	5	621	7821	-10.0526	-8.95531	793	0	-10	0	0
dongo44_신청자	14	2007-12-04	21:09:00	144	87	5	1269	8469	5.44271	5.3344	648	16	15	1	1
dongo44_신청자	15	2007-12-05	08:27:00	146	80	6	507	9147	6.91464	-2.40877	678	2	-7	1	0
Result	nx	reading.date	reading.time	sbp	dbp	day	minutes	time	res.sbp	res.dbp	dtime	dsbp	ddbp	sbp.bi	dbp.bi
dongo45_안영웅	1	2007-11-13	09:42:00	113	80	0	582	582	-4.754	0.644826	NA	NA	NA	0	0
dongo45_안영웅	2	2007-11-13	18:57:00	122	80	0	1137	1137	4.22664	0.740749	555	9	0	0	0
dongo45_안영웅	3	2007-11-13	22:52:00	113	77	0	1372	1372	-4.78156	-2.21863	235	-9	-3	0	0
dongo45_안영웅	4	2007-11-14	07:11:00	111	75	1	431	1871	-6.79897	-4.13239	499	-2	-2	0	0
dongo45_안영웅	5	2007-11-14	07:57:00	123	84	1	477	1917	5.19943	4.87556	46	12	9	0	0
dongo45_안영웅	6	2007-11-14	18:57:00	136	89	1	1137	2577	18.1764	9.98963	660	13	5	1	1
dongo45_안영웅	7	2007-11-14	18:59:00	127	79	1	1139	2579	9.17633	-0.0100224	2	-9	-10	0	0
dongo45_안영웅	8	2007-11-14	23:54:00	120	76	1	1434	2874	2.16604	-2.95904	295	-7	-3	0	0
dongo45_안영웅	9	2007-11-14	23:55:00	121	80	1	1435	2875	3.16601	1.04114	1	1	4	0	0
dongo45_안영웅	10	2007-11-15	05:07:00	114	72	2	307	3187	-3.84488	-6.90494	312	-7	-8	0	0
dongo45_안영웅	11	2007-11-15	09:48:00	116	79	2	588	3468	-1.85468	0.143628	281	2	7	0	0
dongo45_안영웅	12	2007-11-15	18:19:00	104	75	2	1099	3979	-13.8725	-3.76805	511	-12	-4	0	0
dongo45_안영웅	13	2007-11-15	18:20:00	107	75	2	1100	3980	-10.8725	-3.76788	1	3	0	0	0
dongo45_안영웅	14	2007-11-16	00:19:00	104	73	3	19	4339	-13.8851	-5.70583	359	-3	-2	0	0
dongo45_안영웅	15	2007-11-16	08:04:00	114	80	3	484	4804	-3.90128	1.37454	465	10	7	0	0
dongo45_안영웅	16	2007-11-16	09:12:00	128	77	3	552	4872	10.0963	-1.61371	68	14	-3	0	0
dongo45_안영웅	17	2007-11-16	18:03:00	130	88	3	1083	5403	12.0778	9.47806	531	2	11	0	1
dongo45_안영웅	18	2007-11-16	18:05:00	122	86	3	1085	5405	4.07775	7.47841	2	-8	-2	0	1
dongo45_안영웅	19	2007-11-16	23:11:00	112	77	3	1391	5711	-5.93292	-1.4687	306	-10	-9	0	0
dongo45_안영웅	20	2007-11-17	07:39:00	119	83	4	459	6219	1.04936	4.6191	508	7	6	0	0
dongo45_안영웅	21	2007-11-17	08:07:00	116	76	4	487	6247	-1.95162	-2.37606	28	-3	-7	0	0
dongo45_안영웅	22	2007-11-17	20:32:00	124	80	4	1232	6992	6.02239	1.7527	745	8	4	0	0
dongo45_안영웅	23	2007-11-17	23:50:00	115	71	4	1430	7190	-2.98452	-7.21308	198	-9	-9	0	0
Result	nx	reading.date	reading.time	sbp	dbp	day	minutes	time	res.sbp	res.dbp	dtime	dsbp	ddbp	sbp.bi	dbp.bi
dongo46_안윤정	1	2007-09-11	21:06:00	93	56	0	1266	1266	-2.51648	-2.42223	NA	NA	NA	0	0
dongo46_안윤정	2	2007-09-11	21:18:00	90	53	0	1278	1278	-5.51905	-5.43364	12	-3	-3	0	0
dongo46_안윤정	3	2007-09-12	14:21:00	98	62	1	861	2301	2.26179	2.5936	1023	8	9	0	0
dongo46_안윤정	4	2007-09-12	14:27:00	101	65	1	867	2307	5.26051	5.5879	6	3	3	0	0
dongo46_안윤정	5	2007-09-12	22:54:00	92	60	1	1374	2814	-3.84811	0.105798	507	-9	-5	0	0
dongo46_안윤정	6	2007-09-12	22:59:00	96	62	1	1379	2819	0.150824	2.10104	5	4	2	0	0
dongo46_안윤정	7	2007-09-13	10:32:00	91	54	2	632	3512	-4.99764	-6.55792	693	-5	-8	0	0
dongo46_안윤정	8	2007-09-13	12:06:00	112	80	2	726	3606	15.9822	19.3527	94	21	26	0	0
dongo46_안윤정	9	2007-09-13	21:55:00	90	54	2	1315	4195	-6.14396	-7.20737	589	-22	-26	0	0
dongo46_안윤정	10	2007-09-13	22:00:00	92	54	2	1320	4200	-4.14503	-7.21213	5	2	0	0	0
dongo46_안윤정	11	2007-09-14	10:50:00	97	60	3	650	4970	0.690017	-1.94431	770	5	6	0	0
dongo46_안윤정	12	2007-09-14	11:15:00	102	64	3	675	4995	5.68466	2.03192	25	5	4	0	0
dongo46_안윤정	13	2007-09-15	14:35:00	98	60	4	875	6635	1.33333	-3.52754	1640	-4	-4	0	0
dongo46_안윤정	14	2007-09-15	14:37:00	100	64	4	877	6637	3.3329	0.470562	2	2	4	0	0
dongo46_안윤정	15	2007-09-15	21:45:00	101	73	4	1305	7065	4.24121	9.06358	428	1	9	0	0
dongo46_안윤정	16	2007-09-15	21:48:00	87	55	4	1308	7068	-9.75944	-8.93927	3	-14	-18	0	0
dongo46_안윤정	17	2007-09-16	10:10:00	98	64	5	610	7810	1.08161	-0.644827	742	11	9	0	0
dongo46_안윤정	18	2007-09-16	10:11:00	96	64	5	611	7811	-0.918608	-0.645778	1	-2	0	0	0
dongo46_안윤정	19	2007-09-16	23:09:00	93	66	5	1389	8589	-4.08528	0.614433	778	-3	2	0	0
dongo46_안윤정	20	2007-09-16	23:10:00	99	68	5	1390	8590	1.91451	2.61348	1	6	2	0	0
Result	nx	reading.date	reading.time	sbp	dbp	day	minutes	time	res.sbp	res.dbp	dtime	dsbp	ddbp	sbp.bi	dbp.bi
dongo47_양경란	1	2007-11-21	14:50:00	114	77	0	890	890	-26.4485	-19.3355	NA	NA	NA	0	0
dongo47_양경란	2	2007-11-21	18:18:00	160	117	0	1098	1098	20.3453	21.4584	208	46	40	1	1
dongo47_양경란	3	2007-11-21	18:19:00	167	112	0	1099	1099	27.3491	16.4622	1	7	-5	1	1
dongo47_양경란	4	2007-11-21	18:20:00	166	119	0	1100	1100	26.3529	23.466	1	-1	7	1	1
dongo47_양경란	5	2007-11-21	18:21:00	176	130	0	1101	1101	36.3567	34.4698	1	10	11	1	1
dongo47_양경란	6	2007-11-21	19:26:00	160	105	0	1166	1166	20.6048	9.71794	65	-16	-25	1	1
dongo47_양경란	7	2007-11-21	19:26:00	170	114	0	1166	1166	30.6048	18.7179	0	10	9	1	1
dongo47_양경란	8	2007-11-21	19:42:00	123	80	0	1182	1182	-16.3342	-15.221	16	-47	-34	0	0
dongo47_양경란	9	2007-11-22	06:39:00	105	75	1	399	1839	-31.827	-17.7132	657	-18	-5	0	0
dongo47_양경란	10	2007-11-22	08:40:00	116	76	1	520	1960	-20.3652	-16.2514	121	11	1	0	0
dongo47_양경란	11	2007-11-22	21:38:00	111	76	1	1298	2738	-22.3963	-13.2818	778	-5	0	0	0
dongo47_양경란	12	2007-11-22	22:14:00	120	79	1	1334	2774	-13.2589	-10.1443	36	9	3	0	0
dongo47_양경란	13	2007-11-23	06:40:00	110	68	2	400	3280	-21.3279	-19.2129	506	-10	-11	0	0
dongo47_양경란	14	2007-11-23	08:28:00	110	71	2	508	3388	-20.9158	-15.8007	108	0	3	0	0
dongo47_양경란	15	2007-11-23	22:08:00	115	77	2	1328	4208	-12.7866	-6.67079	820	5	6	0	0
dongo47_양경란	16	2007-11-23	22:10:00	112	74	2	1330	4210	-15.7789	-9.66315	2	-3	-3	0	0
dongo47_양경란	17	2007-11-24	08:16:00	117	76	3	496	4816	-8.46636	-5.35006	606	5	2	0	0
dongo47_양경란	18	2007-11-24	21:29:00	134	72	3	1289	5609	11.5598	-6.32319	793	17	-4	0	0
dongo47_양경란	19	2007-11-24	22:04:00	110	63	3	1324	5644	-12.3066	-15.1896	35	-24	-9	0	0
dongo47_양경란	20	2007-11-24	22:05:00	104	59	3	1325	5645	-18.3028	-19.1858	1	-6	-4	0	0
dongo47_양경란	21	2007-11-25	07:38:00	131	78	4	458	6218	10.8839	2.00135	573	27	19	0	0
dongo47_양경란	22	2007-11-25	19:27:00	136	88	4	1167	6927	18.5895	14.7076	709	5	10	1	1
dongo47_양경란	23	2007-11-25	19:28:00	124	84	4	1168	6928	6.59331	10.7114	1	-12	-4	0	0
dongo47_양경란	24	2007-11-25	21:26:00	140	92	4	1286	7046	23.0436	19.1618	118	16	8	1	1
dongo47_양경란	25	2007-11-26	08:39:00	118	78	5	519	7719	3.61186	7.73065	673	-22	-14	0	0
dongo47_양경란	26	2007-11-26	08:41:00	119	81	5	521	7721	4.6195	10.7383	2	1	3	0	0
Result	nx	reading.date	reading.time	sbp	dbp	day	minutes	time	res.sbp	res.dbp	dtime	dsbp	ddbp	sbp.bi	dbp.bi
dongo48_어경화	1	2007-12-13	15:25:00	132	92	0	925	925	8.62037	7.66374	NA	NA	NA	0	1
dongo48_어경화	2	2007-12-14	07:24:00	129	90	1	444	1884	5.59828	5.89321	959	-3	-2	0	1
dongo48_어경화	3	2007-12-14	09:15:00	132	87	1	555	1995	8.59572	2.91977	111	3	-3	0	1
dongo48_어경화	4	2007-12-14	20:59:00	122	82	1	1259	2699	-1.4205	-1.91177	704	-10	-5	0	0
dongo48_어경화	5	2007-12-15	01:47:00	119	80	2	107	2987	-4.42713	-3.84286	288	-3	-2	0	0
dongo48_어경화	6	2007-12-15	09:12:00	122	79	2	552	3432	-1.43739	-4.73638	445	3	-1	0	0
dongo48_어경화	7	2007-12-15	13:53:00	114	77	2	833	3713	-9.44386	-6.66914	281	-8	-2	0	0
dongo48_어경화	8	2007-12-15	21:38:00	112	80	2	1298	4178	-11.4546	-3.55787	465	-2	3	0	0
dongo48_어경화	9	2007-12-16	00:38:00	115	75	3	38	4358	-8.45872	-8.5148	180	3	-5	0	0
dongo48_어경화	10	2007-12-16	07:59:00	136	91	3	479	4799	12.5311	7.59072	441	21	16	1	1
dongo48_어경화	11	2007-12-16	12:04:00	124	85	3	724	5044	0.525477	1.64935	245	-12	-6	0	1
dongo48_어경화	12	2007-12-16	21:34:00	119	80	3	1294	5614	-4.48765	-3.21426	570	-5	-5	0	0
dongo48_어경화	13	2007-12-17	00:34:00	109	78	4	34	5794	-14.4918	-5.17119	180	-10	-2	0	0
dongo48_어경화	14	2007-12-17	10:32:00	124	80	4	632	6392	0.494422	-3.0281	598	15	2	0	0
dongo48_어경화	15	2007-12-17	12:48:00	130	92	4	768	6528	6.49129	9.00445	136	6	12	0	1
dongo48_어경화	16	2007-12-17	21:44:00	116	80	4	1304	7064	-7.52106	-2.8673	536	-14	-12	0	0
dongo48_어경화	17	2007-12-18	00:34:00	126	85	5	34	7234	2.47502	2.17338	170	10	5	0	1
dongo48_어경화	18	2007-12-18	09:00:00	135	91	5	540	7740	11.4634	8.29446	506	9	6	1	1
dongo48_어경화	19	2007-12-18	12:34:00	128	77	5	754	7954	4.45844	-5.65434	214	-7	-14	0	0
dongo48_어경화	20	2007-12-18	21:16:00	113	80	5	1276	8476	-10.5536	-2.52943	522	-15	3	0	0
dongo48_어경화	21	2007-12-18	23:54:00	136	89	5	1434	8634	12.4428	6.50838	158	23	9	1	1
Result	nx	reading.date	reading.time	sbp	dbp	day	minutes	time	res.sbp	res.dbp	dtime	dsbp	ddbp	sbp.bi	dbp.bi
dongo49_여종구	1	2007-09-27	10:42:00	93	46	0	642	642	-16.2424	-15.8071	NA	NA	NA	0	0
dongo49_여종구	2	2007-09-27	18:51:00	113	65	0	1131	1131	2.34904	2.01059	489	20	19	0	0
dongo49_여종구	3	2007-09-27	21:37:00	119	67	0	1297	1297	7.87087	3.60922	166	6	2	0	0
dongo49_여종구	4	2007-09-28	08:06:00	133	79	1	486	1926	20.059	14.0884	629	14	12	0	0
dongo49_여종구	5	2007-09-28	19:03:00	147	77	1	1143	2583	32.1665	10.4998	657	14	-2	1	0
dongo49_여종구	6	2007-09-28	21:04:00	111	59	1	1264	2704	-4.18206	-7.79272	121	-36	-18	0	0
dongo49_여종구	7	2007-09-29	07:06:00	120	72	2	426	3306	3.08385	3.75172	602	9	13	0	0
dongo49_여종구	8	2007-09-29	08:20:00	112	68	2	500	3380	-5.12932	-0.427199	74	-8	-4	0	0
dongo49_여종구	9	2007-09-29	18:28:00	98	61	2	1108	3988	-20.8807	-8.89726	608	-14	-7	0	0
dongo49_여종구	10	2007-09-29	22:35:00	101	64	2	1355	4235	-18.5922	-6.49448	247	3	3	0	0
dongo49_여종구	11	2007-09-30	07:59:00	119	72	3	479	4799	-2.21681	0.141845	564	18	8	0	0
dongo49_여종구	12	2007-09-30	10:29:00	98	60	3	629	4949	-23.6489	-12.2208	150	-21	-12	0	0
dongo49_여종구	13	2007-09-30	17:49:00	104	61	3	1069	5389	-18.9163	-12.2847	440	6	1	0	0
dongo49_여종구	14	2007-09-30	20:12:00	111	62	3	1212	5532	-12.3283	-11.6305	143	7	1	0	0
dongo49_여종구	15	2007-10-01	06:36:00	167	156	4	396	6156	41.8743	80.8608	624	56	94	1	1
dongo49_여종구	16	2007-10-01	06:58:00	145	80	4	418	6178	19.8109	4.8076	22	-22	-76	1	0
dongo49_여종구	17	2007-10-01	09:56:00	120	68	4	596	6356	-5.70183	-7.62278	178	-25	-12	0	0
dongo49_여종구	18	2007-10-01	18:59:00	129	72	4	1139	6899	1.73403	-4.93568	543	9	4	0	0
dongo49_여종구	19	2007-10-01	20:47:00	115	60	4	1247	7007	-12.5771	-17.1968	108	-14	-12	0	0
dongo49_여종구	20	2007-10-02	07:00:00	153	80	5	420	7620	23.6572	1.32104	613	38	20	1	0
dongo49_여종구	21	2007-10-02	07:23:00	123	75	5	443	7643	-6.4091	-3.73458	23	-30	-5	0	0
dongo49_여종구	22	2007-10-02	09:32:00	124	67	5	572	7772	-5.78069	-12.0465	129	1	-8	0	0
Result	nx	reading.date	reading.time	sbp	dbp	day	minutes	time	res.sbp	res.dbp	dtime	dsbp	ddbp	sbp.bi	dbp.bi
dongo50_원옥희	1	2007-10-02	20:41:00	142	80	0	1241	1241	15.596	4.18562	NA	NA	NA	1	0
dongo50_원옥희	2	2007-10-02	21:54:00	123	76	0	1314	1314	-3.26201	0.20865	73	-19	-4	0	0
dongo50_원옥희	3	2007-10-03	07:33:00	106	69	1	453	1893	-19.136	-6.60872	579	-17	-7	0	0
dongo50_원옥희	4	2007-10-03	09:52:00	112	74	1	592	2032	-12.8657	-1.56487	139	6	5	0	0
dongo50_원옥희	5	2007-10-03	18:51:00	140	69	1	1131	2571	16.1825	-6.39485	539	28	-5	1	0
dongo50_원옥희	6	2007-10-03	20:48:00	98	64	1	1248	2688	-25.5899	-11.3579	117	-42	-5	0	0
dongo50_원옥희	7	2007-10-04	07:23:00	124	71	2	443	3323	1.64496	-4.15765	635	26	7	0	0
dongo50_원옥희	8	2007-10-04	10:20:00	132	86	2	620	3500	9.98918	10.8982	177	8	15	0	1
dongo50_원옥희	9	2007-10-04	18:46:00	131	79	2	1126	4006	9.97322	4.05779	506	-1	-7	0	0
dongo50_원옥희	10	2007-10-04	21:23:00	121	73	2	1283	4163	0.278539	-1.89269	157	-10	-6	0	0
dongo50_원옥희	11	2007-10-05	07:26:00	112	70	3	446	4766	-7.54878	-4.70248	603	-9	-3	0	0
dongo50_원옥희	12	2007-10-05	08:52:00	124	73	3	532	4852	4.61846	-1.67536	86	12	3	0	0
dongo50_원옥희	13	2007-10-05	17:39:00	123	96	3	1059	5379	4.64334	21.4909	527	-1	23	0	1
dongo50_원옥희	14	2007-10-05	20:32:00	152	103	3	1232	5552	33.9798	28.5454	173	29	7	1	1
dongo50_원옥희	15	2007-10-06	07:25:00	108	72	4	445	6205	-8.75031	-2.24858	653	-44	-31	0	0
dongo50_원옥희	16	2007-10-06	08:34:00	120	70	4	514	6274	3.38388	-4.22682	69	12	-2	0	0
dongo50_원옥희	17	2007-10-06	18:55:00	127	77	4	1135	6895	11.5916	2.96907	621	7	7	0	0
dongo50_원옥희	18	2007-10-06	21:20:00	94	54	4	1280	7040	-21.1265	-19.9852	145	-33	-23	0	0
dongo50_원옥희	19	2007-10-07	08:19:00	112	73	5	499	7699	-1.84488	-0.777327	659	18	19	0	0
dongo50_원옥희	20	2007-10-07	09:04:00	102	67	5	544	7744	-11.7574	-6.76313	45	-10	-6	0	0
Result	nx	reading.date	reading.time	sbp	dbp	day	minutes	time	res.sbp	res.dbp	dtime	dsbp	ddbp	sbp.bi	dbp.bi
dongo51_원종필	1	2007-12-03	09:05:00	114	71	0	545	545	-7.22808	-4.72776	NA	NA	NA	0	0
dongo51_원종필	2	2007-12-03	21:18:00	109	59	0	1278	1278	-11.338	-15.887	733	-5	-12	0	0
dongo51_원종필	3	2007-12-03	23:37:00	109	63	0	1417	1417	-11.1692	-11.7276	139	0	4	0	0
dongo51_원종필	4	2007-12-04	08:56:00	126	70	1	536	1976	6.50966	-4.08646	559	17	7	0	0
dongo51_원종필	5	2007-12-04	09:36:00	111	60	1	576	2016	-8.44177	-14.0406	40	-15	-10	0	0
dongo51_원종필	6	2007-12-04	22:23:00	99	50	1	1343	2783	-19.5104	-23.1609	767	-12	-10	0	0
dongo51_원종필	7	2007-12-04	22:42:00	123	78	1	1362	2802	4.51272	4.86092	19	24	28	0	0
dongo51_원종필	8	2007-12-05	08:57:00	112	72	2	537	3417	-5.74046	-0.433704	615	-11	-6	0	0
dongo51_원종필	9	2007-12-05	18:00:00	176	132	2	1080	3960	58.9189	60.1891	543	64	60	1	1
dongo51_원종필	10	2007-12-05	18:01:00	155	135	2	1081	3961	37.9202	63.1902	1	-21	3	1	1
dongo51_원종필	11	2007-12-05	19:29:00	114	72	2	1169	4049	-2.97298	0.29117	88	-41	-63	0	0
dongo51_원종필	12	2007-12-06	09:18:00	117	63	3	558	4878	1.03371	-7.75801	829	3	-9	0	0
dongo51_원종필	13	2007-12-06	10:18:00	110	64	3	618	4938	-5.89342	-6.68919	60	-7	1	0	0
dongo51_원종필	14	2007-12-06	17:56:00	103	64	3	1076	5396	-12.3373	-6.16388	458	-7	0	0	0
dongo51_원종필	15	2007-12-06	23:32:00	104	61	3	1412	5732	-10.9292	-8.77851	336	1	-3	0	0
dongo51_원종필	16	2007-12-07	09:20:00	116	70	4	560	6320	1.78481	0.895902	588	12	9	0	0
dongo51_원종필	17	2007-12-07	11:49:00	116	69	4	709	6469	1.96575	0.0667978	149	0	-1	0	0
dongo51_원종필	18	2007-12-07	20:09:00	115	65	4	1209	6969	1.57293	-3.35973	500	-1	-4	0	0
dongo51_원종필	19	2007-12-08	00:03:00	108	61	5	3	7203	-5.14291	-7.09134	234	-7	-4	0	0
dongo51_원종필	20	2007-12-08	09:38:00	110	66	5	578	7778	-2.44466	-1.43184	575	2	5	0	0
dongo51_원종필	21	2007-12-08	12:11:00	115	75	5	731	7931	2.74113	7.74364	153	5	9	0	0
dongo51_원종필	22	2007-12-08	23:49:00	96	52	5	1429	8629	-15.4112	-14.4558	698	-19	-23	0	0
dongo51_원종필	23	2007-12-08	23:58:00	113	59	5	1438	8638	1.59968	-7.44546	9	17	7	0	0
Result	nx	reading.date	reading.time	sbp	dbp	day	minutes	time	res.sbp	res.dbp	dtime	dsbp	ddbp	sbp.bi	dbp.bi
dongo52_원학선	1	2007-11-05	19:41:00	145	96	0	1181	1181	10.6405	5.58724	NA	NA	NA	1	1
dongo52_원학선	2	2007-11-05	23:47:00	129	88	0	1427	1427	-5.49647	-2.21869	246	-16	-8	0	1
dongo52_원학선	3	2007-11-06	06:57:00	130	76	1	417	1857	-4.73582	-13.8795	430	1	-12	0	0
dongo52_원학선	4	2007-11-06	09:05:00	137	93	1	545	1985	2.19293	3.2215	128	7	17	1	1
dongo52_원학선	5	2007-11-06	19:22:00	150	88	1	1162	2602	14.8495	-1.29176	617	13	-5	1	1
dongo52_원학선	6	2007-11-06	23:24:00	124	88	1	1404	2844	-11.2852	-1.10085	242	-26	0	0	1
dongo52_원학선	7	2007-11-07	07:24:00	130	89	2	444	3324	-5.55241	0.277818	480	6	1	0	1
dongo52_원학선	8	2007-11-07	12:34:00	143	96	2	754	3634	7.27504	7.52237	310	13	7	1	1
dongo52_원학선	9	2007-11-07	20:17:00	140	94	2	1217	4097	4.01731	5.88762	463	-3	-2	1	1
dongo52_원학선	10	2007-11-07	23:44:00	121	85	2	1424	4304	-15.0979	-2.94908	207	-19	-9	0	1
dongo52_원학선	11	2007-11-08	07:41:00	130	91	3	461	4781	-6.36343	3.42722	477	9	6	0	1
dongo52_원학선	12	2007-11-08	20:40:00	138	86	3	1240	5560	1.20295	-0.958241	779	8	-5	1	1
dongo52_원학선	13	2007-11-08	23:22:00	136	87	3	1402	5722	-0.887221	0.169558	162	-2	1	1	1
dongo52_원학선	14	2007-11-09	07:54:00	137	86	4	474	6234	-0.172219	-0.426534	512	1	-1	1	1
dongo52_원학선	15	2007-11-09	11:29:00	136	88	4	689	6449	-1.2919	1.74308	215	-1	2	1	1
dongo52_원학선	16	2007-11-09	20:10:00	154	86	4	1210	6970	16.4181	0.154084	521	18	-2	1	1
dongo52_원학선	17	2007-11-09	23:33:00	137	84	4	1413	7173	-0.694901	-1.68577	203	-17	-2	1	0
dongo52_원학선	18	2007-11-10	07:40:00	127	83	5	460	7660	-10.966	-2.30159	487	-10	-1	0	0
dongo52_원학선	19	2007-11-10	10:16:00	144	84	5	616	7816	5.94718	-1.17852	156	17	1	1	0
Result	nx	reading.date	reading.time	sbp	dbp	day	minutes	time	res.sbp	res.dbp	dtime	dsbp	ddbp	sbp.bi	dbp.bi
dongo53_위영숙	1	2007-10-17	20:08:00	108	53	0	1208	1208	5.94289	-3.83876	NA	NA	NA	0	0
dongo53_위영숙	2	2007-10-17	22:41:00	108	67	0	1361	1361	5.79505	10.1446	153	0	14	0	0
dongo53_위영숙	3	2007-10-18	06:08:00	102	56	1	368	1808	-0.636879	-0.90384	447	-6	-11	0	0
dongo53_위영숙	4	2007-10-18	07:20:00	98	62	1	440	1880	-4.70645	5.08835	72	-4	6	0	0
dongo53_위영숙	5	2007-10-18	22:55:00	96	52	1	1375	2815	-7.60992	-5.01306	935	-2	-10	0	0
dongo53_위영숙	6	2007-10-18	22:57:00	103	58	1	1377	2817	-0.611854	0.986721	2	7	6	0	0
dongo53_위영숙	7	2007-10-19	06:24:00	104	64	2	384	3264	-0.0437799	6.93824	447	1	6	0	0
dongo53_위영숙	8	2007-10-19	07:33:00	110	59	2	453	3333	5.88955	1.93075	69	6	-5	0	0
dongo53_위영숙	9	2007-10-19	21:56:00	110	60	2	1316	4196	5.05565	2.83715	863	0	1	0	0
dongo53_위영숙	10	2007-10-19	22:44:00	95	52	2	1364	4244	-9.99073	-5.16806	48	-15	-8	0	0
dongo53_위영숙	11	2007-10-20	06:33:00	116	53	3	393	4713	10.5561	-4.21892	469	21	1	0	0
dongo53_위영숙	12	2007-10-20	08:27:00	119	46	3	507	4827	13.4459	-11.2313	114	3	-7	0	0
dongo53_위영숙	13	2007-10-20	08:29:00	98	48	3	509	4829	-7.55601	-9.23151	2	-21	2	0	0
dongo53_위영숙	14	2007-10-20	20:44:00	104	60	3	1244	5564	-2.26622	2.68877	735	6	12	0	0
dongo53_위영숙	15	2007-10-20	22:15:00	94	48	3	1335	5655	-12.3542	-9.3211	91	-10	-12	0	0
dongo53_위영숙	16	2007-10-20	22:16:00	95	58	3	1336	5656	-11.3551	0.678795	1	1	10	0	0
dongo53_위영숙	17	2007-10-21	06:47:00	110	64	4	407	6167	3.15111	6.62337	511	15	6	0	0
dongo53_위영숙	18	2007-10-21	07:53:00	97	55	4	473	6233	-9.91266	-2.38379	66	-13	-9	0	0
dongo53_위영숙	19	2007-10-22	06:53:00	124	68	5	413	7613	15.7539	10.4665	1380	27	13	0	0
dongo53_위영숙	20	2007-10-22	06:54:00	116	64	5	414	7614	7.75291	6.46642	1	-8	-4	0	0
dongo53_위영숙	21	2007-10-22	07:48:00	102	54	5	468	7668	-6.29927	-3.53943	54	-14	-10	0	0
Result	nx	reading.date	reading.time	sbp	dbp	day	minutes	time	res.sbp	res.dbp	dtime	dsbp	ddbp	sbp.bi	dbp.bi
dongo54_윤동식	1	2007-10-17	20:12:00	142	92	0	1212	1212	9.19501	10.9322	NA	NA	NA	1	1
dongo54_윤동식	2	2007-10-17	22:44:00	116	80	0	1364	1364	-16.6618	-1.06422	152	-26	-12	0	0
dongo54_윤동식	3	2007-10-18	06:14:00	132	78	1	374	1814	-0.238079	-3.05349	450	16	-2	0	0
dongo54_윤동식	4	2007-10-18	07:22:00	132	84	1	442	1882	-0.174043	2.94813	68	0	6	0	0
dongo54_윤동식	5	2007-10-18	23:21:00	145	76	1	1401	2841	13.7291	-5.02901	959	13	-8	1	0
dongo54_윤동식	6	2007-10-19	06:27:00	122	76	2	387	3267	-8.86977	-5.01885	426	-23	0	0	0
dongo54_윤동식	7	2007-10-19	07:31:00	136	80	2	451	3331	5.19049	-1.01733	64	14	4	1	0
dongo54_윤동식	8	2007-10-19	21:53:00	136	80	2	1313	4193	6.00225	-0.996779	862	0	0	1	0
dongo54_윤동식	9	2007-10-19	22:46:00	123	74	2	1366	4246	-6.94784	-6.99552	53	-13	-6	0	0
dongo54_윤동식	10	2007-10-20	06:35:00	123	83	3	395	4715	-6.50618	2.01566	469	0	9	0	0
dongo54_윤동식	11	2007-10-20	08:25:00	142	89	3	505	4825	12.5974	8.01829	110	19	6	1	1
dongo54_윤동식	12	2007-10-20	20:47:00	128	72	3	1247	5567	-0.703842	-8.96403	742	-14	-17	0	0
dongo54_윤동식	13	2007-10-20	22:12:00	124	79	3	1332	5652	-4.6238	-1.962	85	-4	7	0	0
dongo54_윤동식	14	2007-10-21	06:45:00	128	84	4	405	6165	-0.1407	3.05023	513	4	5	0	0
dongo54_윤동식	15	2007-10-21	07:55:00	125	84	4	475	6235	-3.07478	3.0519	70	-3	0	0	0
dongo54_윤동식	16	2007-10-22	06:57:00	128	85	5	417	7617	1.22666	4.08484	1382	3	1	0	1
Result	nx	reading.date	reading.time	sbp	dbp	day	minutes	time	res.sbp	res.dbp	dtime	dsbp	ddbp	sbp.bi	dbp.bi
dongo55_윤인식1	1	2007-10-09	18:43:00	133	83	0	1123	1123	6.71498	-1.90495	NA	NA	NA	0	0
dongo55_윤인식1	2	2007-10-09	18:45:00	123	83	0	1125	1125	-3.28567	-1.9044	2	-10	0	0	0
dongo55_윤인식1	3	2007-10-09	20:42:00	126	80	0	1242	1242	-0.323819	-4.87252	117	3	-3	0	0
dongo55_윤인식1	4	2007-10-09	20:44:00	120	84	0	1244	1244	-6.32447	-0.871979	2	-6	4	0	0
dongo55_윤인식1	5	2007-10-09	20:45:00	118	82	0	1245	1245	-8.3248	-2.87171	1	-2	-2	0	0
dongo55_윤인식1	6	2007-10-09	20:46:00	120	76	0	1246	1246	-6.32512	-8.87143	1	2	-6	0	0
dongo55_윤인식1	7	2007-10-09	20:47:00	131	74	0	1247	1247	4.67455	-10.8712	1	11	-2	0	0
dongo55_윤인식1	8	2007-10-09	20:48:00	120	74	0	1248	1248	-6.32577	-10.8709	1	-11	0	0	0
dongo55_윤인식1	9	2007-10-09	20:50:00	123	70	0	1250	1250	-3.32643	-14.8703	2	3	-4	0	0
dongo55_윤인식1	10	2007-10-10	06:25:00	141	90	1	385	1825	14.4861	5.28632	575	18	20	1	1
dongo55_윤인식1	11	2007-10-10	06:26:00	140	98	1	386	1826	13.4858	13.2866	1	-1	8	1	1
dongo55_윤인식1	12	2007-10-10	06:28:00	144	96	1	388	1828	17.4851	11.2871	2	4	-2	1	1
dongo55_윤인식1	13	2007-10-10	06:29:00	164	95	1	389	1829	37.4848	10.2874	1	20	-1	1	1
dongo55_윤인식1	14	2007-10-10	06:49:00	142	89	1	409	1849	15.4783	4.29285	20	-22	-6	1	1
dongo55_윤인식1	15	2007-10-10	08:31:00	143	93	1	511	1951	16.445	8.32064	102	1	4	1	1
dongo55_윤인식1	16	2007-10-10	08:31:00	128	86	1	511	1951	1.44503	1.32064	0	-15	-7	0	1
dongo55_윤인식1	17	2007-10-10	08:32:00	127	90	1	512	1952	0.444707	5.32092	1	-1	4	0	1
dongo55_윤인식1	18	2007-10-10	08:33:00	116	89	1	513	1953	-10.5556	4.32119	1	-11	-1	0	1
dongo55_윤인식1	19	2007-10-10	08:34:00	128	88	1	514	1954	1.44406	3.32146	1	12	-1	0	1
dongo55_윤인식1	20	2007-10-10	08:34:00	131	85	1	514	1954	4.44406	0.321461	0	3	-3	0	1
dongo55_윤인식1	21	2007-10-10	08:35:00	135	86	1	515	1955	8.44373	1.32173	1	4	1	1	1
dongo55_윤인식1	22	2007-10-10	08:36:00	131	87	1	516	1956	4.4434	2.32201	1	-4	1	0	1
dongo55_윤인식1	23	2007-10-10	17:27:00	125	88	1	1047	2487	-1.72971	3.46668	531	-6	1	0	1
dongo55_윤인식1	24	2007-10-10	17:28:00	124	85	1	1048	2488	-2.73004	0.466951	1	-1	-3	0	1
dongo55_윤인식1	25	2007-10-10	17:29:00	119	88	1	1049	2489	-7.73037	3.46722	1	-5	3	0	1
dongo55_윤인식1	26	2007-10-10	17:29:00	124	86	1	1049	2489	-2.73037	1.46722	0	5	-2	0	1
dongo55_윤인식1	27	2007-10-10	17:31:00	125	84	1	1051	2491	-1.73102	-0.532232	2	1	-2	0	0
dongo55_윤인식1	28	2007-10-10	21:09:00	104	80	1	1269	2709	-22.8021	-4.47284	218	-21	-4	0	0
dongo55_윤인식1	29	2007-10-10	21:10:00	125	77	1	1270	2710	-1.80242	-7.47256	1	21	-3	0	0
dongo55_윤인식1	30	2007-10-10	21:12:00	126	81	1	1272	2712	-0.803068	-3.47202	2	1	4	0	0
dongo55_윤인식1	31	2007-10-10	21:40:00	132	83	1	1300	2740	5.1878	-1.46439	28	6	2	0	0
dongo55_윤인식1	32	2007-10-10	21:41:00	119	79	1	1301	2741	-7.81252	-5.46412	1	-13	-4	0	0
dongo55_윤인식1	33	2007-10-10	21:43:00	119	78	1	1303	2743	-7.81317	-6.46357	2	0	-1	0	0
dongo55_윤인식1	34	2007-10-10	21:45:00	113	79	1	1305	2745	-13.8138	-5.46303	2	-6	1	0	0
dongo55_윤인식1	35	2007-10-11	06:37:00	122	84	2	397	3277	-4.98727	-0.318085	532	9	5	0	0
dongo55_윤인식1	36	2007-10-11	06:38:00	132	83	2	398	3278	5.0124	-1.31781	1	10	-1	0	0
dongo55_윤인식1	37	2007-10-11	06:39:00	125	85	2	399	3279	-1.98792	0.68246	1	-7	2	0	1
dongo55_윤인식1	38	2007-10-11	06:39:00	115	83	2	399	3279	-11.9879	-1.31754	0	-10	-2	0	0
dongo55_윤인식1	39	2007-10-11	06:41:00	118	83	2	401	3281	-8.98857	-1.31699	2	3	0	0	0
dongo55_윤인식1	40	2007-10-11	10:40:00	119	83	2	640	3520	-8.06649	-1.25188	239	1	0	0	0
dongo55_윤인식1	41	2007-10-11	10:41:00	131	84	2	641	3521	3.93318	-0.251606	1	12	1	0	0
dongo55_윤인식1	42	2007-10-11	10:41:00	125	82	2	641	3521	-2.06682	-2.25161	0	-6	-2	0	0
dongo55_윤인식1	43	2007-10-11	10:42:00	121	90	2	642	3522	-6.06714	5.74867	1	-4	8	0	1
dongo55_윤인식1	44	2007-10-11	10:44:00	122	88	2	644	3524	-5.0678	3.74921	2	1	-2	0	1
dongo55_윤인식1	45	2007-10-11	18:02:00	131	86	2	1082	3962	3.78941	1.86855	438	9	-2	0	1
dongo55_윤인식1	46	2007-10-11	18:03:00	129	82	2	1083	3963	1.78908	-2.13118	1	-2	-4	0	0
dongo55_윤인식1	47	2007-10-11	18:04:00	122	87	2	1084	3964	-5.21125	2.86909	1	-7	5	0	1
dongo55_윤인식1	48	2007-10-12	00:01:00	129	86	3	1	4321	1.67237	1.96636	357	7	-1	0	1
dongo55_윤인식1	49	2007-10-12	00:01:00	130	85	3	1	4321	2.67237	0.966355	0	1	-1	0	1
dongo55_윤인식1	50	2007-10-12	00:03:00	125	84	3	3	4323	-2.32829	-0.0330998	2	-5	-1	0	0
dongo55_윤인식1	51	2007-10-12	00:04:00	128	82	3	4	4324	0.671387	-2.03283	1	3	-2	0	0
dongo55_윤인식1	52	2007-10-12	06:46:00	128	85	3	406	4726	0.540327	1.0767	402	0	3	0	1
dongo55_윤인식1	53	2007-10-12	06:47:00	114	86	3	407	4727	-13.46	2.07697	1	-14	1	0	1
dongo55_윤인식1	54	2007-10-12	06:48:00	118	83	3	408	4728	-9.46032	-0.922757	1	4	-3	0	0
dongo55_윤인식1	55	2007-10-12	06:49:00	123	84	3	409	4729	-4.46065	0.0775157	1	5	1	0	0
dongo55_윤인식1	56	2007-10-12	06:51:00	123	81	3	411	4731	-4.4613	-2.92194	2	0	-3	0	0
dongo55_윤인식1	57	2007-10-12	06:52:00	116	89	3	412	4732	-11.4616	5.07833	1	-7	8	0	1
dongo55_윤인식1	58	2007-10-13	19:12:00	148	91	4	1152	6912	19.8276	7.67228	2180	32	2	1	1
dongo55_윤인식1	59	2007-10-13	19:14:00	132	90	4	1154	6914	3.827	6.67282	2	-16	-1	0	1
dongo55_윤인식1	60	2007-10-13	19:15:00	132	86	4	1155	6915	3.82667	2.6731	1	0	-4	0	1
dongo55_윤인식1	61	2007-10-13	19:16:00	127	84	4	1156	6916	-1.17366	0.673368	1	-5	-2	0	0
dongo55_윤인식1	62	2007-10-14	07:21:00	134	92	5	441	7641	5.58998	8.8709	725	7	8	0	1
dongo55_윤인식1	63	2007-10-14	07:22:00	139	89	5	442	7642	10.5897	5.87117	1	5	-3	1	1
dongo55_윤인식1	64	2007-10-14	07:23:00	131	88	5	443	7643	2.58933	4.87144	1	-8	-1	0	1
dongo55_윤인식1	65	2007-10-14	07:25:00	141	89	5	445	7645	12.5887	5.87199	2	10	1	1	1
dongo55_윤인식1	66	2007-10-14	07:30:00	132	77	5	450	7650	3.58704	-6.12665	5	-9	-12	0	0
dongo55_윤인식1	67	2007-10-14	17:48:00	128	78	5	1068	8268	-0.614436	-4.95828	618	-4	1	0	0
dongo55_윤인식1	68	2007-10-14	21:12:00	120	73	5	1272	8472	-8.68094	-9.9027	204	-8	-5	0	0
dongo55_윤인식1	69	2007-10-15	07:29:00	126	74	6	449	9089	-2.8821	-8.73459	617	6	1	0	0
dongo55_윤인식1	70	2007-10-15	08:52:00	124	72	6	532	9172	-4.90916	-10.712	83	-2	-2	0	0
Result	nx	reading.date	reading.time	sbp	dbp	day	minutes	time	res.sbp	res.dbp	dtime	dsbp	ddbp	sbp.bi	dbp.bi
dongo56_윤인식2	1	2007-09-11	06:08:00	129	90	0	368	368	-0.637416	2.26977	NA	NA	NA	0	1
dongo56_윤인식2	2	2007-09-11	06:30:00	121	84	0	390	390	-8.65375	-3.73513	22	-8	-6	0	0
dongo56_윤인식2	3	2007-09-11	18:01:00	121	84	0	1081	1081	-9.16673	-3.88876	691	0	0	0	0
dongo56_윤인식2	4	2007-09-11	20:35:00	130	84	0	1235	1235	-0.28106	-3.923	154	9	0	0	0
dongo56_윤인식2	5	2007-09-12	06:07:00	126	87	1	367	1807	-4.7057	-1.05018	572	-4	3	0	1
dongo56_윤인식2	6	2007-09-12	06:34:00	137	92	1	394	1834	6.27425	3.94382	27	11	5	1	1
dongo56_윤인식2	7	2007-09-12	18:57:00	148	82	1	1137	2577	16.7227	-6.22138	743	11	-10	1	0
dongo56_윤인식2	8	2007-09-12	20:24:00	132	90	1	1224	2664	0.65808	1.75928	87	-16	8	0	1
dongo56_윤인식2	9	2007-09-13	06:05:00	128	89	2	365	3245	-3.77324	0.630097	581	-4	-1	0	1
dongo56_윤인식2	10	2007-09-13	06:27:00	138	94	2	387	3267	6.21042	5.62521	22	10	5	1	1
dongo56_윤인식2	11	2007-09-13	17:30:00	147	97	2	1050	3930	14.7182	8.47779	663	9	3	1	1
dongo56_윤인식2	12	2007-09-13	23:45:00	122	87	2	1425	4305	-10.5602	-1.60558	375	-25	-10	0	1
dongo56_윤인식2	13	2007-09-14	06:05:00	128	93	3	365	4685	-4.84227	4.30993	380	6	6	0	1
dongo56_윤인식2	14	2007-09-14	06:31:00	132	92	3	391	4711	-0.861572	3.30415	26	4	-1	0	1
dongo56_윤인식2	15	2007-09-14	17:25:00	133	84	3	1045	5365	-0.347088	-4.84126	654	1	-8	0	0
dongo56_윤인식2	16	2007-09-14	21:49:00	135	84	3	1309	5629	1.45692	-4.89996	264	2	0	1	0
dongo56_윤인식2	17	2007-09-15	06:05:00	139	96	4	365	6125	5.0887	6.98976	496	4	12	1	1
dongo56_윤인식2	18	2007-09-15	06:21:00	151	95	4	381	6141	17.0768	5.9862	16	12	-1	1	1
dongo56_윤인식2	19	2007-09-15	17:40:00	115	76	4	1060	6820	-19.4273	-13.1648	679	-36	-19	0	0
dongo56_윤인식2	20	2007-09-15	23:03:00	137	88	4	1383	7143	2.33296	-1.23658	323	22	12	1	1
dongo56_윤인식2	21	2007-09-16	07:43:00	130	94	5	463	7663	-5.05308	4.6478	520	-7	6	0	1
dongo56_윤인식2	22	2007-09-16	07:54:00	131	92	5	474	7674	-4.06124	2.64536	11	1	-2	0	1
dongo56_윤인식2	23	2007-09-16	18:51:00	133	84	5	1131	8331	-2.54899	-5.50072	657	2	-8	0	0
dongo56_윤인식2	24	2007-09-16	20:26:00	140	89	5	1226	8426	4.38049	-0.521841	95	7	5	1	1
Result	nx	reading.date	reading.time	sbp	dbp	day	minutes	time	res.sbp	res.dbp	dtime	dsbp	ddbp	sbp.bi	dbp.bi
dongo57_윤정자	1	2007-10-10	18:44:00	136	85	0	1124	1124	-11.8742	-5.00593	NA	NA	NA	1	1
dongo57_윤정자	2	2007-10-10	20:31:00	131	80	0	1231	1231	-16.6427	-9.88927	107	-5	-5	0	0
dongo57_윤정자	3	2007-10-11	06:43:00	168	102	1	403	1843	21.6816	12.778	612	37	22	1	1
dongo57_윤정자	4	2007-10-11	06:57:00	147	86	1	417	1857	0.711938	-3.20673	14	-21	-16	1	1
dongo57_윤정자	5	2007-10-11	09:21:00	156	84	1	561	2001	10.0235	-5.04973	144	9	-2	1	0
dongo57_윤정자	6	2007-10-11	18:23:00	132	83	1	1103	2543	-12.8036	-5.45878	542	-24	-1	0	0
dongo57_윤정자	7	2007-10-11	21:01:00	132	88	1	1261	2701	-12.4617	-0.286511	158	0	5	0	1
dongo57_윤정자	8	2007-10-12	07:06:00	147	93	2	426	3306	3.84747	5.37313	605	15	5	1	1
dongo57_윤정자	9	2007-10-12	08:06:00	142	83	2	486	3366	-1.02269	-4.56145	60	-5	-10	1	0
dongo57_윤정자	10	2007-10-12	20:53:00	146	93	2	1253	4133	4.63704	6.27481	767	4	10	1	1
dongo57_윤정자	11	2007-10-12	21:09:00	133	88	2	1269	4149	-8.32833	1.29226	16	-13	-5	0	1
dongo57_윤정자	12	2007-10-13	07:12:00	167	99	3	432	4752	26.9765	12.9497	603	34	11	1	1
dongo57_윤정자	13	2007-10-13	07:14:00	156	98	3	434	4754	15.9808	11.9519	2	-11	-1	1	1
dongo57_윤정자	14	2007-10-13	07:16:00	152	89	3	436	4756	11.9852	2.95408	2	-4	-9	1	1
dongo57_윤정자	15	2007-10-13	07:46:00	141	90	3	466	4786	1.05009	3.98679	30	-11	1	1	1
dongo57_윤정자	16	2007-10-13	09:19:00	130	77	3	559	4879	-9.74866	-8.91182	93	-11	-13	0	0
dongo57_윤정자	17	2007-10-13	19:12:00	148	93	3	1152	5472	9.53455	7.73474	593	18	16	1	1
dongo57_윤정자	18	2007-10-13	21:24:00	129	81	3	1284	5604	-9.17981	-4.12134	132	-19	-12	0	0
dongo57_윤정자	19	2007-10-14	06:48:00	159	96	4	408	6168	22.0406	11.4936	564	30	15	1	1
dongo57_윤정자	20	2007-10-14	10:01:00	131	84	4	601	6361	-5.54172	-0.295975	193	-28	-12	0	0
dongo57_윤정자	21	2007-10-14	19:24:00	122	77	4	1164	6924	-13.3234	-6.68213	563	-9	-7	0	0
dongo57_윤정자	22	2007-10-14	20:51:00	92	52	4	1251	7011	-43.1352	-31.5873	87	-30	-25	0	0
dongo57_윤정자	23	2007-10-15	06:42:00	143	92	5	402	7602	9.14372	9.0571	591	51	40	1	1
dongo57_윤정자	24	2007-10-15	09:03:00	140	82	5	543	7743	6.44883	-0.789166	141	-3	-10	1	0
Result	nx	reading.date	reading.time	sbp	dbp	day	minutes	time	res.sbp	res.dbp	dtime	dsbp	ddbp	sbp.bi	dbp.bi
dongo58_윤효식	1	2007-09-10	17:17:00	137	84	0	1037	1037	19.1669	8.74508	NA	NA	NA	1	0
dongo58_윤효식	2	2007-09-10	21:59:00	117	78	0	1319	1319	-0.919064	2.78296	282	-20	-6	0	0
dongo58_윤효식	3	2007-09-11	05:19:00	110	77	1	319	1759	-8.05323	1.84205	440	-7	-1	0	0
dongo58_윤효식	4	2007-09-11	07:30:00	128	81	1	450	1890	9.90682	5.85965	131	18	4	0	0
dongo58_윤효식	5	2007-09-11	18:49:00	113	75	1	1129	2569	-5.30022	-0.0491583	679	-15	-6	0	0
dongo58_윤효식	6	2007-09-11	22:07:00	111	69	1	1327	2767	-7.36059	-6.02257	198	-2	-6	0	0
dongo58_윤효식	7	2007-09-12	05:14:00	112	75	2	314	3194	-6.4908	0.0347844	427	1	6	0	0
dongo58_윤효식	8	2007-09-12	07:41:00	105	63	2	461	3341	-13.5356	-11.9455	147	-7	-12	0	0
dongo58_윤효식	9	2007-09-12	17:57:00	118	74	2	1077	3957	-0.723455	-0.862738	616	13	11	0	0
dongo58_윤효식	10	2007-09-12	22:42:00	127	77	2	1362	4242	8.18964	2.17554	285	9	3	0	0
dongo58_윤효식	11	2007-09-13	06:19:00	113	73	3	379	4699	-5.94971	-1.76308	457	-14	-4	0	0
dongo58_윤효식	12	2007-09-13	07:50:00	126	73	3	470	4790	7.02254	-1.75086	91	13	0	0	0
dongo58_윤효식	13	2007-09-13	18:01:00	119	70	3	1081	5401	-0.163766	-4.6688	611	-7	-3	0	0
dongo58_윤효식	14	2007-09-14	00:09:00	120	69	4	9	5769	0.724021	-5.61937	368	1	-1	0	0
dongo58_윤효식	15	2007-09-14	06:22:00	124	73	4	382	6142	4.61028	-1.56927	373	4	4	0	0
dongo58_윤효식	16	2007-09-14	17:40:00	112	67	4	1060	6820	-7.59645	-7.47821	678	-12	-6	0	0
dongo58_윤효식	17	2007-09-14	22:12:00	125	86	4	1332	7092	5.32061	11.5583	272	13	19	0	1
dongo58_윤효식	18	2007-09-15	06:08:00	109	74	5	368	7568	-10.8245	-0.377751	476	-16	-12	0	0
dongo58_윤효식	19	2007-09-15	08:44:00	115	68	5	524	7724	-4.87211	-6.3568	156	6	-6	0	0
dongo58_윤효식	20	2007-09-15	16:42:00	129	85	5	1002	8202	8.98214	10.7074	478	14	17	0	1
dongo58_윤효식	21	2007-09-15	23:01:00	128	79	5	1381	8581	7.86657	4.7583	379	-1	-6	0	0
Result	nx	reading.date	reading.time	sbp	dbp	day	minutes	time	res.sbp	res.dbp	dtime	dsbp	ddbp	sbp.bi	dbp.bi
dongo59_이성자	1	2007-10-10	18:46:00	131	88	0	1126	1126	6.88502	11.7718	NA	NA	NA	0	1
dongo59_이성자	2	2007-10-10	21:25:00	118	72	0	1285	1285	-6.11401	-4.3498	159	-13	-16	0	0
dongo59_이성자	3	2007-10-11	06:29:00	112	72	1	389	1829	-12.1107	-4.76585	544	-6	0	0	0
dongo59_이성자	4	2007-10-11	09:15:00	124	76	1	555	1995	-0.109699	-0.892806	166	12	4	0	0
dongo59_이성자	5	2007-10-11	09:15:00	123	67	1	555	1995	-1.1097	-9.89281	0	-1	-9	0	0
dongo59_이성자	6	2007-10-11	18:25:00	140	79	1	1105	2545	15.8936	1.68656	550	17	12	1	0
dongo59_이성자	7	2007-10-11	21:03:00	120	78	1	1263	2703	-4.1054	0.565721	158	-20	-1	0	0
dongo59_이성자	8	2007-10-12	05:28:00	116	76	2	328	3208	-8.10233	-1.8205	505	-4	-2	0	0
dongo59_이성자	9	2007-10-12	11:18:00	125	76	2	678	3558	0.899791	-2.08818	350	9	0	0	0
dongo59_이성자	10	2007-10-12	23:30:00	124	78	2	1410	4290	-0.0957643	-0.648004	732	-1	2	0	0
dongo59_이성자	11	2007-10-13	00:09:00	120	74	3	9	4329	-4.09553	-4.67783	39	-4	-4	0	0
dongo59_이성자	12	2007-10-13	07:43:00	128	85	3	463	4783	3.90723	5.97495	454	8	11	0	1
dongo59_이성자	13	2007-10-13	11:44:00	140	90	3	704	5024	15.9087	10.7906	241	12	5	1	1
dongo59_이성자	14	2007-10-13	19:46:00	124	82	3	1186	5506	-0.088381	2.42201	482	-16	-8	0	0
dongo59_이성자	15	2007-10-13	21:17:00	119	77	3	1277	5597	-5.08783	-2.64759	91	-5	-5	0	0
dongo59_이성자	16	2007-10-14	09:02:00	143	97	4	542	6302	18.9165	16.8132	705	24	20	1	1
dongo59_이성자	17	2007-10-14	11:26:00	130	81	4	686	6446	5.91733	0.703104	144	-13	-16	0	0
dongo59_이성자	18	2007-10-14	18:46:00	134	89	4	1126	6886	9.92	8.3666	440	4	8	0	1
dongo59_이성자	19	2007-10-14	20:54:00	84	60	4	1254	7014	-40.0792	-20.7313	128	-50	-29	0	0
dongo59_이성자	20	2007-10-15	09:03:00	128	76	5	543	7743	3.9252	-5.28883	729	44	16	0	0
dongo59_이성자	21	2007-10-15	09:06:00	123	80	5	546	7746	-1.07478	-1.29113	3	-5	4	0	0
Result	nx	reading.date	reading.time	sbp	dbp	day	minutes	time	res.sbp	res.dbp	dtime	dsbp	ddbp	sbp.bi	dbp.bi
dongo60_이순진	1	2007-10-02	20:47:00	161	103	0	1247	1247	18.4559	6.39226	NA	NA	NA	1	1
dongo60_이순진	2	2007-10-02	22:13:00	155	103	0	1333	1333	12.6664	6.5387	86	-6	0	1	1
dongo60_이순진	3	2007-10-03	07:23:00	152	108	1	443	1883	11.0124	12.4752	550	-3	5	1	1
dongo60_이순진	4	2007-10-03	09:55:00	132	90	1	595	2035	-8.61563	-5.26595	152	-20	-18	0	1
dongo60_이순진	5	2007-10-03	19:07:00	133	101	1	1147	2587	-6.26472	6.67398	552	1	11	0	1
dongo60_이순진	6	2007-10-03	20:51:00	140	85	1	1251	2691	0.9898	-9.14893	104	7	-16	1	1
dongo60_이순진	7	2007-10-04	06:31:00	122	86	2	391	3271	-15.5908	-7.16132	580	-18	1	0	1
dongo60_이순진	8	2007-10-04	09:52:00	125	83	2	592	3472	-12.0989	-9.81906	201	3	-3	0	0
dongo60_이순진	9	2007-10-04	18:48:00	134	91	2	1128	4008	-1.78709	-0.906374	536	9	8	0	1
dongo60_이순진	10	2007-10-04	21:29:00	131	88	2	1289	4169	-4.39308	-3.63223	161	-3	-3	0	1
dongo60_이순진	11	2007-10-05	06:25:00	122	88	3	385	4705	-12.0813	-2.71954	536	-9	0	0	1
dongo60_이순진	12	2007-10-05	08:48:00	118	80	3	528	4848	-15.7314	-10.476	143	-4	-8	0	0
dongo60_이순진	13	2007-10-05	17:42:00	132	93	3	1062	5382	-0.424492	3.43324	534	14	13	0	1
dongo60_이순진	14	2007-10-05	20:34:00	138	90	3	1234	5554	5.99644	0.72612	172	6	-3	1	1
dongo60_이순진	15	2007-10-06	06:50:00	130	89	4	410	6170	-0.496013	0.775031	616	-8	-1	0	1
dongo60_이순진	16	2007-10-06	09:33:00	132	84	4	573	6333	1.9029	-3.94742	163	2	-5	0	0
dongo60_이순진	17	2007-10-06	18:57:00	129	92	4	1137	6897	0.28318	5.01295	564	-3	8	0	1
dongo60_이순진	18	2007-10-06	21:00:00	160	93	4	1260	7020	31.5842	6.22239	123	31	1	1	1
dongo60_이순진	19	2007-10-07	08:17:00	122	89	5	497	7697	-4.75897	3.37517	677	-38	-4	0	1
dongo60_이순진	20	2007-10-07	09:02:00	126	87	5	542	7742	-0.648844	1.4518	45	4	-2	0	1
Result	nx	reading.date	reading.time	sbp	dbp	day	minutes	time	res.sbp	res.dbp	dtime	dsbp	ddbp	sbp.bi	dbp.bi
dongo61_이양균	1	2007-10-16	19:30:00	136	79	0	1170	1170	16.116	7.2074	NA	NA	NA	1	0
dongo61_이양균	2	2007-10-16	19:32:00	129	75	0	1172	1172	9.1206	3.20943	2	-7	-4	0	0
dongo61_이양균	3	2007-10-16	23:14:00	125	72	0	1394	1394	5.63091	0.434392	222	-4	-3	0	0
dongo61_이양균	4	2007-10-16	23:16:00	122	76	0	1396	1396	2.63551	4.43642	2	-3	4	0	0
dongo61_이양균	5	2007-10-16	23:18:00	118	71	0	1398	1398	-1.35989	-0.561555	2	-4	-5	0	0
dongo61_이양균	6	2007-10-17	06:56:00	127	68	1	416	1856	8.69291	-3.09744	458	9	-3	0	0
dongo61_이양균	7	2007-10-17	06:58:00	123	72	1	418	1858	4.69751	0.904583	2	-4	4	0	0
dongo61_이양균	8	2007-10-17	07:00:00	100	53	1	420	1860	-18.2979	-18.0934	2	-23	-19	0	0
dongo61_이양균	9	2007-10-17	21:43:00	117	72	1	1303	2743	0.731857	1.80139	883	17	19	0	0
dongo61_이양균	10	2007-10-17	21:46:00	115	80	1	1306	2746	-1.26125	9.80443	3	-2	8	0	0
dongo61_이양균	11	2007-10-17	23:09:00	114	72	1	1389	2829	-2.07045	1.88854	83	-1	-8	0	0
dongo61_이양균	12	2007-10-18	07:16:00	112	71	2	436	3316	-2.95099	1.38204	487	-2	-1	0	0
dongo61_이양균	13	2007-10-18	07:18:00	112	68	2	438	3318	-2.94639	-1.61594	2	0	-3	0	0
dongo61_이양균	14	2007-10-18	07:20:00	100	68	2	440	3320	-14.9418	-1.61391	2	-12	0	0	0
dongo61_이양균	15	2007-10-18	07:21:00	108	68	2	441	3321	-6.9395	-1.6129	1	8	0	0	0
dongo61_이양균	16	2007-10-18	21:31:00	113	68	2	1291	4171	0.0143984	-0.751557	850	5	0	0	0
dongo61_이양균	17	2007-10-18	21:32:00	111	70	2	1292	4172	-1.9833	1.24946	1	-2	2	0	0
dongo61_이양균	18	2007-10-18	23:14:00	104	67	2	1394	4274	-8.74884	-1.64718	102	-7	-3	0	0
dongo61_이양균	19	2007-10-19	06:35:00	105	67	3	395	4715	-6.73511	-1.2003	441	1	0	0	0
dongo61_이양균	20	2007-10-19	06:37:00	105	64	3	397	4717	-6.73051	-4.19827	2	0	-3	0	0
dongo61_이양균	21	2007-10-19	13:21:00	108	69	3	801	5121	-2.80184	1.21112	404	3	5	0	0
dongo61_이양균	22	2007-10-19	13:23:00	114	63	3	803	5123	3.20276	-4.78686	2	6	-6	0	0
dongo61_이양균	23	2007-10-19	20:56:00	119	72	3	1256	5576	9.24407	4.67219	453	5	9	0	0
dongo61_이양균	24	2007-10-19	20:57:00	128	72	3	1257	5577	18.2464	4.6732	1	9	0	0	0
dongo61_이양균	25	2007-10-19	20:59:00	112	68	3	1259	5579	2.25097	0.675228	2	-16	-4	0	0
dongo61_이양균	26	2007-10-19	23:05:00	88	59	3	1385	5705	-21.4594	-8.19709	126	-24	-9	0	0
dongo61_이양균	27	2007-10-19	23:06:00	116	68	3	1386	5706	6.5429	0.803922	1	28	9	0	0
dongo61_이양균	28	2007-10-19	23:08:00	105	64	3	1388	5708	-4.4525	-3.19405	2	-11	-4	0	0
dongo61_이양균	29	2007-10-20	07:01:00	109	68	4	421	6181	0.634782	1.28526	473	4	4	0	0
dongo61_이양균	30	2007-10-20	16:06:00	108	64	4	966	6726	0.887573	-2.16247	545	-1	-4	0	0
dongo61_이양균	31	2007-10-20	16:08:00	112	64	4	968	6728	4.89217	-2.16044	2	4	0	0	0
dongo61_이양균	32	2007-10-20	23:21:00	105	69	4	1401	7161	-1.11249	3.27834	433	-7	5	0	0
dongo61_이양균	33	2007-10-20	23:27:00	108	68	4	1407	7167	1.9013	2.28442	6	3	-1	0	0
dongo61_이양균	34	2007-10-21	07:24:00	106	68	5	444	7644	0.997778	2.76778	477	-2	0	0	0
dongo61_이양균	35	2007-10-21	09:58:00	113	66	5	598	7798	8.35178	0.923834	154	7	-2	0	0
Result	nx	reading.date	reading.time	sbp	dbp	day	minutes	time	res.sbp	res.dbp	dtime	dsbp	ddbp	sbp.bi	dbp.bi
dongo62_이영희	1	2007-10-10	18:45:00	142	95	0	1125	1125	-1.22421	7.38377	NA	NA	NA	1	1
dongo62_이영희	2	2007-10-10	21:01:00	149	92	0	1261	1261	5.84359	4.44083	136	7	-3	1	1
dongo62_이영희	3	2007-10-11	06:09:00	144	77	1	369	1809	1.1168	-10.3292	548	-5	-15	1	0
dongo62_이영희	4	2007-10-11	06:11:00	137	78	1	371	1811	-5.88221	-9.32841	2	-7	1	1	0
dongo62_이영희	5	2007-10-11	08:01:00	136	80	1	481	1921	-6.82737	-7.28225	110	-1	2	1	0
dongo62_이영희	6	2007-10-11	19:03:00	135	93	1	1143	2583	-7.49733	5.9955	662	-1	13	1	1
dongo62_이영희	7	2007-10-11	21:02:00	155	97	1	1262	2702	12.562	10.0454	119	20	4	1	1
dongo62_이영희	8	2007-10-11	21:05:00	152	92	1	1265	2705	9.5635	5.04669	3	-3	-5	1	1
dongo62_이영희	9	2007-10-12	06:03:00	155	90	2	363	3243	12.8317	3.27242	538	3	-2	1	1
dongo62_이영희	10	2007-10-12	08:09:00	147	92	2	489	3369	4.89453	5.32528	126	-8	2	1	1
dongo62_이영희	11	2007-10-12	17:58:00	129	85	2	1078	3958	-12.8118	-1.42759	589	-18	-7	0	1
dongo62_이영희	12	2007-10-12	21:03:00	122	71	2	1263	4143	-19.7196	-15.35	185	-7	-14	0	0
dongo62_이영희	13	2007-10-13	06:11:00	140	80	3	371	4691	-1.44639	-6.12005	548	18	9	1	0
dongo62_이영희	14	2007-10-13	09:29:00	148	94	3	569	4889	6.65232	7.96302	198	8	14	1	1
dongo62_이영희	15	2007-10-13	18:02:00	141	89	3	1082	5402	-0.091924	3.17826	513	-7	-5	1	1
dongo62_이영희	16	2007-10-13	21:00:00	131	79	3	1260	5580	-10.0032	-6.74705	178	-10	-10	0	0
dongo62_이영희	17	2007-10-14	06:10:00	145	80	4	370	6130	4.27102	-5.51629	550	14	1	1	0
dongo62_이영희	18	2007-10-14	09:01:00	144	85	4	541	6301	3.35627	-0.444547	171	-1	5	1	1
dongo62_이영희	19	2007-10-14	18:20:00	144	94	4	1100	6860	3.63496	8.78999	559	0	9	1	1
dongo62_이영희	20	2007-10-14	21:01:00	139	88	4	1261	7021	-1.28478	2.85754	161	-5	-6	1	1
dongo62_이영희	21	2007-10-15	06:12:00	134	84	5	372	7572	-6.01008	-0.911277	551	-5	-4	0	0
dongo62_이영희	22	2007-10-15	08:57:00	148	84	5	537	7737	8.07218	-0.842048	165	14	0	1	0
Result	nx	reading.date	reading.time	sbp	dbp	day	minutes	time	res.sbp	res.dbp	dtime	dsbp	ddbp	sbp.bi	dbp.bi
dongo63_이원호	1	2007-11-21	15:33:00	100	67	0	933	933	-12.6658	-3.6561	NA	NA	NA	0	0
dongo63_이원호	2	2007-11-21	15:35:00	123	77	0	935	935	10.3322	6.34053	2	23	10	0	0
dongo63_이원호	3	2007-11-23	09:57:00	114	76	2	597	3477	-1.21283	1.05901	2542	-9	-1	0	0
dongo63_이원호	4	2007-11-23	10:37:00	120	75	2	637	3517	4.74712	-0.00836281	40	6	-1	0	0
dongo63_이원호	5	2007-11-24	22:48:00	135	80	3	1368	5688	17.5735	1.33499	2171	15	5	1	0
dongo63_이원호	6	2007-11-24	22:50:00	116	73	3	1370	5690	-1.4285	-5.66838	2	-19	-7	0	0
dongo63_이원호	7	2007-11-24	22:52:00	113	69	3	1372	5692	-4.4305	-9.67174	2	-3	-4	0	0
dongo63_이원호	8	2007-11-24	22:55:00	108	85	3	1375	5695	-9.43351	6.3232	3	-5	16	0	1
dongo63_이원호	9	2007-11-25	22:44:00	122	79	4	1364	7124	3.13577	-2.08368	1429	14	-6	0	0
dongo63_이원호	10	2007-11-25	22:45:00	110	74	4	1365	7125	-8.86523	-7.08537	1	-12	-5	0	0
dongo63_이원호	11	2007-11-26	10:42:00	124	90	5	642	7842	4.4169	7.70698	717	14	16	0	1
dongo63_이원호	12	2007-11-26	10:43:00	126	90	5	643	7843	6.4159	7.7053	1	2	0	0	1
dongo63_이원호	13	2007-11-26	10:44:00	111	80	5	644	7844	-8.5851	-2.29639	1	-15	-10	0	0
Result	nx	reading.date	reading.time	sbp	dbp	day	minutes	time	res.sbp	res.dbp	dtime	dsbp	ddbp	sbp.bi	dbp.bi
dongo64_이일수	1	2007-10-02	20:44:00	135	74	0	1244	1244	5.50806	-3.21719	NA	NA	NA	1	0
dongo64_이일수	2	2007-10-02	21:52:00	131	73	0	1312	1312	1.50688	-4.25767	68	-4	-1	0	0
dongo64_이일수	3	2007-10-03	05:31:00	118	76	1	331	1771	-11.5011	-1.53096	459	-13	3	0	0
dongo64_이일수	4	2007-10-03	05:43:00	128	78	1	343	1783	-1.50133	0.461891	12	10	2	0	0
dongo64_이일수	5	2007-10-03	19:18:00	133	76	1	1158	2598	3.48446	-2.02336	815	5	-2	0	0
dongo64_이일수	6	2007-10-03	22:00:00	123	72	1	1320	2760	-6.51837	-6.11982	162	-10	-4	0	0
dongo64_이일수	7	2007-10-04	05:38:00	128	89	2	338	3218	-1.52635	10.6075	458	5	17	0	1
dongo64_이일수	8	2007-10-04	05:48:00	137	88	2	348	3228	7.47347	9.60153	10	9	-1	1	1
dongo64_이일수	9	2007-10-04	19:42:00	136	80	2	1182	4062	6.45893	1.10497	834	-1	-8	1	0
dongo64_이일수	10	2007-10-04	22:40:00	138	86	2	1360	4240	8.45583	6.99898	178	2	6	1	1
dongo64_이일수	11	2007-10-05	06:48:00	137	88	3	408	4728	7.44732	8.70843	488	-1	2	1	1
dongo64_이일수	12	2007-10-05	09:19:00	122	77	3	559	4879	-7.55531	-2.38148	151	-15	-11	0	0
dongo64_이일수	13	2007-10-05	19:37:00	129	79	3	1177	5497	-0.56609	-0.749439	618	7	2	0	0
dongo64_이일수	14	2007-10-05	22:38:00	134	80	3	1358	5678	4.43075	0.142793	181	5	1	0	0
dongo64_이일수	15	2007-10-06	07:51:00	116	78	4	471	6231	-13.5789	-2.18647	553	-18	-2	0	0
dongo64_이일수	16	2007-10-06	09:25:00	132	70	4	565	6325	2.41947	-10.2424	94	16	-8	0	0
dongo64_이일수	17	2007-10-06	19:10:00	120	72	4	1150	6910	-9.59073	-8.59074	585	-12	2	0	0
dongo64_이일수	18	2007-10-06	21:37:00	124	74	4	1297	7057	-5.59329	-6.67827	147	4	2	0	0
dongo64_이일수	19	2007-10-08	05:37:00	136	86	6	337	8977	6.37323	4.17856	1920	12	12	1	1
dongo64_이일수	20	2007-10-08	05:46:00	134	88	6	346	8986	4.37308	6.1732	9	-2	2	0	1
Result	nx	reading.date	reading.time	sbp	dbp	day	minutes	time	res.sbp	res.dbp	dtime	dsbp	ddbp	sbp.bi	dbp.bi
dongo65_이종연	1	2007-10-10	18:53:00	178	73	0	1133	1133	36.6535	4.95284	NA	NA	NA	1	0
dongo65_이종연	2	2007-10-10	22:26:00	140	66	0	1346	1346	-1.2783	-1.97666	213	-38	-7	1	0
dongo65_이종연	3	2007-10-11	07:50:00	140	70	1	470	1910	-1.09767	2.21003	564	0	4	1	0
dongo65_이종연	4	2007-10-11	08:21:00	134	65	1	501	1941	-7.08774	-2.7797	31	-6	-5	0	0
dongo65_이종연	5	2007-10-11	19:04:00	136	74	1	1144	2584	-4.8818	6.43314	643	2	9	1	0
dongo65_이종연	6	2007-10-11	22:53:00	142	67	1	1373	2813	1.19154	-0.49106	229	6	-7	1	0
dongo65_이종연	7	2007-10-12	06:44:00	135	67	2	404	3284	-5.65761	-0.335152	471	-7	0	1	0
dongo65_이종연	8	2007-10-12	08:29:00	121	62	2	509	3389	-19.624	-5.3004	105	-14	-5	0	0
dongo65_이종연	9	2007-10-12	18:41:00	137	70	2	1121	4001	-3.42797	2.90219	612	16	8	1	0
dongo65_이종연	10	2007-10-12	23:22:00	139	66	2	1402	4282	-1.33798	-1.0048	281	2	-4	1	0
dongo65_이종연	11	2007-10-13	07:56:00	130	62	3	476	4796	-10.1734	-4.83466	514	-9	-4	0	0
dongo65_이종연	12	2007-10-13	08:49:00	130	64	3	529	4849	-10.1564	-2.81711	53	0	2	0	0
dongo65_이종연	13	2007-10-13	23:15:00	160	71	3	1395	5715	20.121	4.46954	866	30	7	1	0
dongo65_이종연	14	2007-10-14	06:45:00	144	62	4	405	6165	4.2651	-4.3815	450	-16	-9	1	0
dongo65_이종연	15	2007-10-14	09:04:00	136	65	4	544	6304	-3.69038	-1.33549	139	-8	3	1	0
dongo65_이종연	16	2007-10-14	19:12:00	128	65	4	1152	6912	-11.4957	-1.13423	608	-8	0	0	0
dongo65_이종연	17	2007-10-15	06:39:00	136	60	5	399	7599	-3.27563	-5.90682	687	8	-5	1	0
dongo65_이종연	18	2007-10-15	18:34:00	160	77	5	1114	8314	20.9534	11.3299	715	24	17	1	0
Result	nx	reading.date	reading.time	sbp	dbp	day	minutes	time	res.sbp	res.dbp	dtime	dsbp	ddbp	sbp.bi	dbp.bi
dongo66_이창수	1	2007-09-18	00:29:00	121	88	0	29	29	-1.50832	9.51143	NA	NA	NA	0	1
dongo66_이창수	2	2007-09-18	00:56:00	124	75	0	56	56	1.49015	-3.49991	27	3	-13	0	0
dongo66_이창수	3	2007-09-18	06:18:00	118	87	0	378	378	-4.52814	8.36495	322	-6	12	0	1
dongo66_이창수	4	2007-09-18	06:32:00	127	77	0	392	392	4.47106	-1.64093	14	9	-10	0	0
dongo66_이창수	5	2007-09-18	23:37:00	108	77	0	1417	1417	-14.5872	-2.07112	1025	-19	0	0	0
dongo66_이창수	6	2007-09-18	23:51:00	132	82	0	1431	1431	9.41204	2.923	14	24	5	0	0
dongo66_이창수	7	2007-09-19	07:12:00	112	76	1	432	1872	-10.613	-3.26209	441	-20	-6	0	0
dongo66_이창수	8	2007-09-19	07:38:00	123	82	1	458	1898	0.385517	2.727	26	11	6	0	0
dongo66_이창수	9	2007-09-20	07:10:00	112	69	2	430	3310	-10.6947	-10.8656	1412	-11	-13	0	0
dongo66_이창수	10	2007-09-20	07:11:00	133	77	2	431	3311	10.3053	-2.86604	1	21	8	0	0
dongo66_이창수	11	2007-09-20	23:01:00	124	85	2	1381	4261	1.25129	4.73524	950	-9	8	0	1
dongo66_이창수	12	2007-09-20	23:14:00	132	84	2	1394	4274	9.25055	3.72979	13	8	-1	0	0
dongo66_이창수	13	2007-09-20	23:26:00	121	70	2	1406	4286	-1.75013	-10.2752	12	-11	-14	0	0
dongo66_이창수	14	2007-09-21	22:46:00	135	79	3	1366	5686	12.1703	-1.86283	1400	14	9	1	0
dongo66_이창수	15	2007-09-21	22:47:00	125	80	3	1367	5687	2.17029	-0.863251	1	-10	1	0	0
dongo66_이창수	16	2007-09-26	18:47:00	116	89	8	1127	12647	-7.22506	5.21562	6960	-9	9	0	1
Result	nx	reading.date	reading.time	sbp	dbp	day	minutes	time	res.sbp	res.dbp	dtime	dsbp	ddbp	sbp.bi	dbp.bi
dongo67_장숙분	1	2007-11-06	06:24:00	142	96	0	384	384	-5.78257	0.0712403	NA	NA	NA	1	1
dongo67_장숙분	2	2007-11-06	18:40:00	160	97	0	1120	1120	12.1513	1.28555	736	18	1	1	1
dongo67_장숙분	3	2007-11-07	06:59:00	140	97	1	419	1859	-7.9151	1.50074	739	-20	0	1	1
dongo67_장숙분	4	2007-11-07	19:29:00	148	95	1	1169	2609	0.0175197	-0.280871	750	8	-2	1	1
dongo67_장숙분	5	2007-11-07	21:37:00	142	90	1	1297	2737	-5.99398	-5.2436	128	-6	-5	1	1
dongo67_장숙분	6	2007-11-08	21:34:00	144	89	2	1294	4174	-4.12309	-5.82517	1437	2	-1	1	1
dongo67_장숙분	7	2007-11-09	07:44:00	156	95	3	464	4784	7.8221	0.352458	610	12	6	1	1
dongo67_장숙분	8	2007-11-10	05:15:00	155	96	4	315	6075	6.70611	1.72838	1291	-1	1	1	1
dongo67_장숙분	9	2007-11-10	06:44:00	153	106	4	404	6164	4.69811	11.7543	89	-2	10	1	1
dongo67_장숙분	10	2007-11-12	10:24:00	141	88	6	624	9264	-7.58041	-5.34303	3100	-12	-18	1	1
Result	nx	reading.date	reading.time	sbp	dbp	day	minutes	time	res.sbp	res.dbp	dtime	dsbp	ddbp	sbp.bi	dbp.bi
dongo68_장영구	1	2007-12-06	22:24:00	124	69	0	1344	1344	0.990894	-6.807	NA	NA	NA	0	0
dongo68_장영구	2	2007-12-07	06:22:00	114	72	1	382	1822	-8.28184	-3.43106	478	-10	3	0	0
dongo68_장영구	3	2007-12-07	07:44:00	121	80	1	464	1904	-1.15708	4.63343	82	7	8	0	0
dongo68_장영구	4	2007-12-07	22:12:00	116	75	1	1332	2772	-4.83644	0.316095	868	-5	-5	0	0
dongo68_장영구	5	2007-12-08	07:00:00	109	72	2	420	3300	-11.0331	-2.26864	528	-7	-3	0	0
dongo68_장영구	6	2007-12-08	07:45:00	133	82	2	465	3345	13.0354	7.76675	45	24	10	0	0
dongo68_장영구	7	2007-12-08	19:44:00	131	73	2	1184	4064	12.1293	-0.66777	719	-2	-9	0	0
dongo68_장영구	8	2007-12-08	23:49:00	112	70	2	1429	4309	-6.49793	-3.47508	245	-19	-3	0	0
dongo68_장영구	9	2007-12-09	07:10:00	124	80	3	430	4750	6.17304	6.87176	441	12	10	0	0
dongo68_장영구	10	2007-12-09	07:47:00	120	75	3	467	4787	2.22934	1.90086	37	-4	-5	0	0
dongo68_장영구	11	2007-12-09	20:26:00	132	75	3	1226	5546	15.3841	2.4978	759	12	0	0	0
dongo68_장영구	12	2007-12-10	07:14:00	109	73	4	434	6194	-6.62994	1.00744	648	-23	-2	0	0
dongo68_장영구	13	2007-12-10	20:27:00	116	67	4	1227	6987	1.57659	-4.36888	793	7	-6	0	0
dongo68_장영구	14	2007-12-10	22:22:00	104	64	4	1342	7102	-10.2484	-7.27844	115	-12	-3	0	0
dongo68_장영구	15	2007-12-11	07:10:00	110	72	5	430	7630	-3.4451	1.13683	528	6	8	0	0
dongo68_장영구	16	2007-12-11	07:47:00	114	73	5	467	7667	0.611191	2.16593	37	4	1	0	0
Result	nx	reading.date	reading.time	sbp	dbp	day	minutes	time	res.sbp	res.dbp	dtime	dsbp	ddbp	sbp.bi	dbp.bi
dongo69_전순자	1	2007-10-17	20:11:00	155	83	0	1211	1211	-0.9163	1.77296	NA	NA	NA	1	0
dongo69_전순자	2	2007-10-17	20:12:00	146	82	0	1212	1212	-9.9155	0.773059	1	-9	-1	1	0
dongo69_전순자	3	2007-10-17	20:43:00	139	77	0	1243	1243	-16.8907	-4.22391	31	-7	-5	1	0
dongo69_전순자	4	2007-10-18	04:52:00	193	81	1	292	1732	37.5011	-0.176142	489	54	4	1	0
dongo69_전순자	5	2007-10-18	05:50:00	160	85	1	350	1790	4.54752	3.82952	58	-33	4	1	1
dongo69_전순자	6	2007-10-18	08:16:00	156	80	1	496	1936	0.664477	-1.15621	146	-4	-5	1	0
dongo69_전순자	7	2007-10-18	19:13:00	146	81	1	1153	2593	-8.80922	-0.0920311	657	-10	1	1	0
dongo69_전순자	8	2007-10-18	20:23:00	148	82	1	1223	2663	-6.75314	0.914807	70	2	1	1	0
dongo69_전순자	9	2007-10-19	07:06:00	179	70	2	426	3306	24.7619	-11.0224	643	31	-12	1	0
dongo69_전순자	10	2007-10-19	07:08:00	151	78	2	428	3308	-3.23645	-3.02218	2	-28	8	1	0
dongo69_전순자	11	2007-10-19	08:10:00	154	76	2	490	3370	-0.186785	-5.01613	62	3	-2	1	0
dongo69_전순자	12	2007-10-19	20:05:00	148	90	2	1205	4085	-5.61402	9.05372	715	-6	14	1	1
dongo69_전순자	13	2007-10-19	23:15:00	150	96	2	1395	4275	-3.46181	15.0723	190	2	6	1	1
dongo69_전순자	14	2007-10-19	23:16:00	156	84	2	1396	4276	2.53899	3.07238	1	6	-12	1	0
dongo69_전순자	15	2007-10-20	05:57:00	129	74	3	357	4677	-24.1398	-6.88844	401	-27	-10	0	0
dongo69_전순자	16	2007-10-20	06:55:00	154	77	3	415	4735	0.906679	-3.88278	58	25	3	1	0
dongo69_전순자	17	2007-10-21	07:31:00	172	84	4	451	6211	20.0891	3.26141	1476	18	7	1	0
dongo69_전순자	18	2007-10-21	08:11:00	131	89	4	491	6251	-20.8789	8.26532	40	-41	5	0	1
dongo69_전순자	19	2007-10-21	19:47:00	148	79	4	1187	6947	-3.32135	-1.66669	696	17	-10	1	0
dongo69_전순자	20	2007-10-21	20:32:00	161	77	4	1232	6992	9.7147	-3.66229	45	13	-2	1	0
dongo69_전순자	21	2007-10-22	06:03:00	144	80	5	363	7563	-6.82789	-0.606511	571	-17	3	1	0
dongo69_전순자	22	2007-10-22	07:12:00	161	76	5	432	7632	10.2274	-4.59977	69	17	-4	1	0
Result	nx	reading.date	reading.time	sbp	dbp	day	minutes	time	res.sbp	res.dbp	dtime	dsbp	ddbp	sbp.bi	dbp.bi
dongo70_정개화	1	2007-10-09	17:05:00	136	66	0	1025	1025	15.9596	1.71793	NA	NA	NA	1	0
dongo70_정개화	2	2007-10-09	22:09:00	117	65	0	1329	1329	-3.24766	0.702555	304	-19	-1	0	0
dongo70_정개화	3	2007-10-09	22:11:00	123	68	0	1331	1331	2.75098	3.70245	2	6	3	0	0
dongo70_정개화	4	2007-10-10	06:33:00	116	67	1	393	1833	-4.59129	2.67707	502	-7	-1	0	0
dongo70_정개화	5	2007-10-10	08:47:00	118	60	1	527	1967	-2.68265	-4.32971	134	2	-7	0	0
dongo70_정개화	6	2007-10-10	17:09:00	116	58	1	1029	2469	-5.02491	-6.3551	502	-2	-2	0	0
dongo70_정개화	7	2007-10-10	21:01:00	124	60	1	1261	2701	2.81691	-4.36683	232	8	2	0	0
dongo70_정개화	8	2007-10-11	06:48:00	92	49	2	408	3288	-29.5833	-15.3965	587	-32	-11	0	0
dongo70_정개화	9	2007-10-11	06:49:00	120	75	2	409	3289	-1.58399	10.6034	1	28	26	0	0
dongo70_정개화	10	2007-10-11	08:44:00	120	71	2	524	3404	-1.6624	6.59762	115	0	-4	0	0
dongo70_정개화	11	2007-10-11	17:04:00	132	72	2	1024	3904	9.9967	7.57233	500	12	1	0	0
dongo70_정개화	12	2007-10-11	21:01:00	132	74	2	1261	4141	9.83512	9.56034	237	0	2	0	0
dongo70_정개화	13	2007-10-12	06:40:00	121	56	3	400	4720	-1.55965	-8.46894	579	-11	-18	0	0
dongo70_정개화	14	2007-10-12	09:07:00	128	58	3	547	4867	5.34013	-6.47637	147	7	2	0	0
dongo70_정개화	15	2007-10-12	17:45:00	124	58	3	1065	5385	0.986956	-6.50257	518	-4	0	0	0
dongo70_정개화	16	2007-10-12	17:48:00	121	61	3	1068	5388	-2.01509	-3.50272	3	-3	3	0	0
dongo70_정개화	17	2007-10-12	22:28:00	128	72	3	1348	5668	4.79401	7.48312	280	7	11	0	0
dongo70_정개화	18	2007-10-13	06:57:00	130	71	4	417	6177	6.44697	6.45738	509	2	-1	0	0
dongo70_정개화	19	2007-10-13	09:46:00	119	64	4	586	6346	-4.66826	-0.551171	169	-11	-7	0	0
dongo70_정개화	20	2007-10-13	18:35:00	132	62	4	1115	6875	7.97107	-2.57792	529	13	-2	0	0
dongo70_정개화	21	2007-10-14	07:05:00	114	68	5	425	7625	-10.5403	3.38415	750	-18	6	0	0
dongo70_정개화	22	2007-10-14	09:21:00	120	60	5	561	7761	-4.633	-4.62273	136	6	-8	0	0
dongo70_정개화	23	2007-10-14	17:16:00	123	68	5	1036	8236	-1.95686	3.35325	475	3	8	0	0
dongo70_정개화	24	2007-10-14	21:58:00	132	64	5	1318	8518	6.85087	-0.661017	282	9	-4	0	0
Result	nx	reading.date	reading.time	sbp	dbp	day	minutes	time	res.sbp	res.dbp	dtime	dsbp	ddbp	sbp.bi	dbp.bi
dongo71_정동화	1	2007-11-21	21:29:00	147	82	0	1289	1289	7.98412	-5.28158	NA	NA	NA	1	0
dongo71_정동화	2	2007-11-21	21:31:00	144	89	0	1291	1291	4.98479	1.7172	2	-3	7	1	1
dongo71_정동화	3	2007-11-22	12:28:00	131	87	1	748	2188	-7.7175	-0.828341	897	-13	-2	0	1
dongo71_정동화	4	2007-11-22	17:13:00	139	96	1	1033	2473	0.377094	7.99832	285	8	9	1	1
dongo71_정동화	5	2007-11-22	17:15:00	148	93	1	1035	2475	9.37776	4.99711	2	9	-3	1	1
dongo71_정동화	6	2007-11-22	21:46:00	138	83	1	1306	2746	-0.532297	-5.16771	271	-10	-10	1	0
dongo71_정동화	7	2007-11-23	07:33:00	133	84	2	453	3333	-5.33747	-4.52472	587	-5	1	0	0
dongo71_정동화	8	2007-11-23	10:56:00	137	92	2	656	3536	-1.27009	3.35182	203	4	8	1	1
dongo71_정동화	9	2007-11-23	18:19:00	157	99	2	1099	3979	18.8769	10.0824	443	20	7	1	1
dongo71_정동화	10	2007-11-23	19:33:00	136	88	2	1173	4053	-2.0985	-0.962615	74	-21	-11	1	1
dongo71_정동화	11	2007-11-24	08:32:00	138	87	3	512	4832	0.16005	-2.43639	779	2	-1	1	1
dongo71_정동화	12	2007-11-24	19:41:00	128	92	3	1181	5501	-9.61791	2.15673	669	-10	5	0	1
dongo71_정동화	13	2007-11-25	07:44:00	120	83	4	464	6224	-17.3779	-7.28299	723	-8	-9	0	0
dongo71_정동화	14	2007-11-25	13:37:00	124	87	4	817	6577	-13.2608	-3.49769	353	4	4	0	1
dongo71_정동화	15	2007-11-25	15:29:00	131	83	4	929	6689	-6.22361	-7.5658	112	7	-4	0	0
dongo71_정동화	16	2007-11-26	08:25:00	144	96	5	505	7705	7.1136	4.81628	1016	13	13	1	1
dongo71_정동화	17	2007-11-26	15:59:00	131	84	5	959	8159	-5.73571	-7.45984	454	-13	-12	0	0
dongo71_정동화	18	2007-11-26	18:26:00	137	94	5	1106	8306	0.313076	2.45076	147	6	10	1	1
dongo71_정동화	19	2007-11-26	20:09:00	132	90	5	1209	8409	-4.65274	-1.61189	103	-5	-4	0	1
dongo71_정동화	20	2007-11-27	07:17:00	143	95	6	437	9077	6.56897	2.98184	668	11	5	1	1
dongo71_정동화	21	2007-11-28	08:21:00	154	99	7	501	10581	18.0682	6.06712	1504	11	4	1	1
Result	nx	reading.date	reading.time	sbp	dbp	day	minutes	time	res.sbp	res.dbp	dtime	dsbp	ddbp	sbp.bi	dbp.bi
dongo72_정어순	1	2007-11-14	14:11:00	119	88	0	851	851	-16.2738	-4.40172	NA	NA	NA	0	1
dongo72_정어순	2	2007-11-15	06:49:00	147	99	1	409	1849	11.6334	6.56221	998	28	11	1	1
dongo72_정어순	3	2007-11-15	22:55:00	133	92	1	1375	2815	-2.45641	-0.4727	966	-14	-7	0	1
dongo72_정어순	4	2007-11-16	07:23:00	138	96	2	443	3323	2.49634	3.50894	508	5	4	1	1
dongo72_정어순	5	2007-11-16	14:30:00	125	83	2	870	3750	-10.5434	-9.50649	427	-13	-13	0	0
dongo72_정어순	6	2007-11-17	08:06:00	150	104	3	486	4806	14.3584	11.4553	1056	25	21	1	1
dongo72_정어순	7	2007-11-17	09:02:00	140	95	3	542	4862	4.35321	2.45332	56	-10	-9	1	1
dongo72_정어순	8	2007-11-17	19:15:00	143	94	3	1155	5475	7.2962	1.43117	613	3	-1	1	1
dongo72_정어순	9	2007-11-17	22:30:00	123	88	3	1350	5670	-12.7219	-4.57588	195	-20	-6	0	1
dongo72_정어순	10	2007-11-18	07:36:00	141	84	4	456	6216	5.22729	-8.59561	546	18	-4	1	0
dongo72_정어순	11	2007-11-18	12:33:00	143	81	4	753	6513	7.19966	-11.6063	297	2	-3	1	0
dongo72_정어순	12	2007-11-18	18:29:00	136	92	4	1109	6869	0.166555	-0.619213	356	-7	11	1	1
dongo72_정어순	13	2007-11-18	22:46:00	139	106	4	1366	7126	3.14265	13.3715	257	3	14	1	1
dongo72_정어순	14	2007-11-19	09:32:00	153	96	5	572	7772	17.0826	3.34815	646	14	-10	1	1
dongo72_정어순	15	2007-11-19	19:17:00	129	92	5	1157	8357	-6.97183	-0.672991	585	-24	-4	0	1
dongo72_정어순	16	2007-11-19	22:22:00	112	91	5	1342	8542	-23.989	-1.67968	185	-17	-1	0	1
Result	nx	reading.date	reading.time	sbp	dbp	day	minutes	time	res.sbp	res.dbp	dtime	dsbp	ddbp	sbp.bi	dbp.bi
dongo73_정영미	1	2007-11-15	08:26:00	116	59	0	506	506	1.40518	-1.28587	NA	NA	NA	0	0
dongo73_정영미	2	2007-11-15	19:00:00	120	60	0	1140	1140	4.4595	-0.760356	634	4	1	0	0
dongo73_정영미	3	2007-11-15	20:12:00	114	60	0	1212	1212	-1.64789	-0.814241	72	-6	0	0	0
dongo73_정영미	4	2007-11-16	05:55:00	113	60	1	355	1795	-3.5175	-1.25056	583	-1	0	0	0
dongo73_정영미	5	2007-11-16	08:26:00	114	60	1	506	1946	-2.74274	-1.36356	151	1	0	0	0
dongo73_정영미	6	2007-11-17	06:17:00	118	65	2	377	3257	-0.698238	2.65529	1311	4	5	0	0
dongo73_정영미	7	2007-11-17	08:13:00	124	62	2	493	3373	5.12874	-0.431523	116	6	-3	0	0
dongo73_정영미	8	2007-11-17	19:12:00	118	66	2	1152	4032	-1.85424	3.07528	659	-6	4	0	0
dongo73_정영미	9	2007-11-17	22:03:00	124	69	2	1323	4203	3.8907	5.94731	171	6	3	0	0
dongo73_정영미	10	2007-11-18	07:16:00	130	56	3	436	4756	9.06584	-7.46655	553	6	-13	0	0
dongo73_정영미	11	2007-11-18	22:40:00	120	63	3	1360	5680	-2.31241	-1.15807	924	-10	7	0	0
dongo73_정영미	12	2007-11-18	22:42:00	112	63	3	1362	5682	-10.3154	-1.15957	2	-8	0	0	0
dongo73_정영미	13	2007-11-19	08:04:00	115	63	4	484	6244	-8.15368	-1.58017	562	3	0	0	0
dongo73_정영미	14	2007-11-19	09:48:00	122	68	4	588	6348	-1.30881	3.342	104	7	5	0	0
dongo73_정영미	15	2007-11-19	16:07:00	123	65	4	967	6727	-0.874126	0.05836	379	1	-3	0	0
dongo73_정영미	16	2007-11-19	18:22:00	130	70	4	1102	6862	5.92451	4.95733	135	7	5	0	0
dongo73_정영미	17	2007-11-19	23:23:00	125	73	4	1403	7163	0.475532	7.73206	301	-5	3	0	0
dongo73_정영미	18	2007-11-20	08:32:00	118	57	5	512	7712	-7.34336	-8.67881	549	-7	-16	0	0
dongo73_정영미	19	2007-11-20	10:15:00	125	69	5	615	7815	-0.496999	3.24411	103	7	12	0	0
dongo73_정영미	20	2007-11-20	22:19:00	136	69	5	1339	8539	9.42308	2.70227	724	11	0	1	0
dongo73_정영미	21	2007-11-21	08:43:00	129	59	6	523	9163	1.49231	-7.76473	624	-7	-10	0	0
Result	nx	reading.date	reading.time	sbp	dbp	day	minutes	time	res.sbp	res.dbp	dtime	dsbp	ddbp	sbp.bi	dbp.bi
dongo74_정영진	1	2007-11-05	20:14:00	136	79	0	1214	1214	-1.10477	-1.66124	NA	NA	NA	1	0
dongo74_정영진	2	2007-11-05	22:51:00	132	76	0	1371	1371	-5.44606	-4.5965	157	-4	-3	0	0
dongo74_정영진	3	2007-11-06	05:30:00	141	87	1	330	1770	2.68658	6.56804	399	9	11	1	1
dongo74_정영진	4	2007-11-06	06:51:00	147	84	1	411	1851	8.51049	3.60144	81	6	-3	1	0
[truncated: 412 more rows]

## Sheet: list_4
Result	nx	reading.date	reading.time	sbp	dbp	day	minutes	time	res.sbp	res.dbp	dtime	dsbp	ddbp	sbp.bi	dbp.bi
[truncated: 1,588 more rows]

[truncated: 4 more sheets: list_5, list_6, list_7, Codebook]
