# Supplementary material for: A Count-Based Binary Decision Method For Target Blood Pressure Achievement in Home Blood Pressure Monitoring Data Interpretation For Clinical Practices
Source: Research Square preprint supplement (doi:10.21203/rs.3.rs-728435/v1), 2021-07-24
Supplement: Supplementary file 4 [file 7b46e303f3334e7db2d02ab3.docx]

**Supplementary Figures**


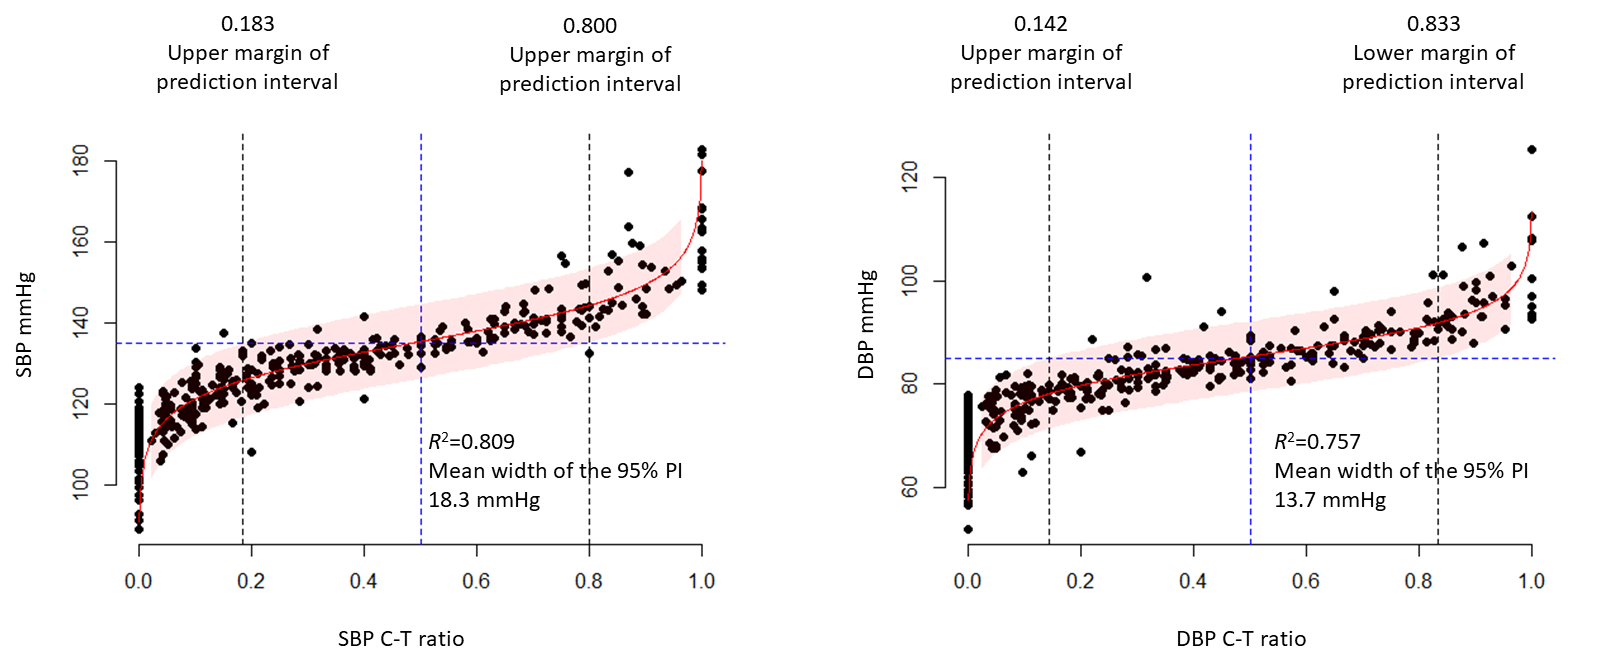


Supplementary Figure 1. Non-linear relationship between the high BP count-to-total BP reading (C-T) ratio and BP.

The relationship between the C-T ratio and SBP/DBP is fitted well with a logit curve. The red curved line represents BP estimated using the C-T ratio and the reddish ribbon represents the 95% prediction interval of the SBPs/DBPs corresponding to the C-T ratio. The mean widths of the 95% prediction intervals are wider than those estimated in the linear models with BP range restrictions.

**Supplementary Tables**

| Supplementary Table 1. Diagnostic performances of the high BP counts at the best threshold | | | | | | | | | | | | | | | | | |
| --- | --- | --- | --- | --- | --- | --- | --- | --- | --- | --- | --- | --- | --- | --- | --- | --- | --- |
|  | SBP | | | | | | | | DBP | | | | | | | | |
| *K* | SD | uncontrolled SBP (N/100) | Thres | Sens | Spec | PPV | NPV | CCR | SD | uncontrolled DBP (N/100) | Thres | Sens | Spec | PPV | NPV | CCR |
| 24 | 5 | 50 | ≥12 | 0.907 | 0.895 | 0.867 | 0.927 | 0.90 | 3.5 | 54 | ≥12 | 1.000 | 1.000 | 1.000 | 1.000 | 1.00 |
|  | 10 | 50 | ≥12 | 0.880 | 0.800 | 0.815 | 0.870 | 0.84 | 7 | 56 | ≥12 | 1.000 | 0.867 | 0.902 | 1.000 | 0.94 |
|  | 15 | 49 | ≥12 | 0.878 | 0.902 | 0.896 | 0.885 | 0.89 | 10.5 | 57 | ≥12 | 0.912 | 0.930 | 0.945 | 0.889 | 0.92 |
|  | 20 | 48 | ≥11 | 1.000 | 0.577 | 0.686 | 1.000 | 0.78 | 14 | 53 | ≥13 | 0.830 | 0.979 | 0.978 | 0.836 | 0.90 |
| 20 | 5 | 44 | ≥11 | 0.909 | 0.946 | 0.930 | 0.930 | 0.93 | 3.5 | 51 | ≥10 | 0.980 | 0.959 | 0.962 | 0.979 | 0.97 |
|  | 10 | 54 | ≥11 | 0.796 | 0.978 | 0.977 | 0.804 | 0.88 | 7 | 47 | ≥11 | 0.915 | 1.000 | 1.000 | 0.930 | 0.96 |
|  | 15 | 49 | ≥10 | 0.878 | 0.804 | 0.811 | 0.872 | 0.84 | 10.5 | 53 | ≥10 | 0.943 | 0.957 | 0.962 | 0.938 | 0.95 |
|  | 20 | 50 | ≥10 | 0.940 | 0.740 | 0.783 | 0.925 | 0.84 | 14 | 54 | ≥10 | 0.889 | 0.848 | 0.873 | 0.867 | 0.87 |
| 16 | 5 | 48 | ≥9 | 0.844 | 1.000 | 1.000 | 0.887 | 0.93 | 3.5 | 51 | ≥8 | 1.000 | 0.957 | 0.964 | 1.000 | 0.98 |
|  | 10 | 50 | ≥8 | 0.933 | 0.800 | 0.792 | 0.936 | 0.86 | 7 | 53 | ≥8 | 0.897 | 0.929 | 0.945 | 0.867 | 0.91 |
|  | 15 | 54 | ≥9 | 0.816 | 0.941 | 0.930 | 0.842 | 0.88 | 10.5 | 56 | ≥9 | 0.820 | 0.960 | 0.953 | 0.842 | 0.89 |
|  | 20 | 51 | ≥8 | 0.857 | 0.818 | 0.857 | 0.818 | 0.84 | 14 | 53 | ≥9 | 0.776 | 0.922 | 0.905 | 0.810 | 0.85 |
| K, the number of BP measurements; SD, standard deviation; PPV, postive predictive value; NPV, negative predictive value; CCR, correct classification rate; SBP, systolic BP | | | | | | | | | | | | | | | | | |
| * Threshold was derived from Youden's J indexes | | | | | | | | | | | | | | | | | |
| The high SBP/DBP were defined as SBP ≥135 mmHg or DBP ≥85 mmHg. | | | | | | | | | | | | | | | | | |
