# Supplementary material for: A Count-Based Binary Decision Method For Target Blood Pressure Achievement in Home Blood Pressure Monitoring Data Interpretation For Clinical Practices
Source: Research Square preprint supplement (doi:10.21203/rs.3.rs-728435/v1), 2021-07-24
Supplement: Supplementary file 7 [file 01ced98a9c44e70b3740cebb.xlsx]

## Sheet: Shin -SR - Supplementary data 4
id	sex	age	bmi	dm	dyslipidemia	nmeasure	mean.sbp	mean.dbp	sd.sbp	sd.dbp	n.sbp135	n.dbp85	n.htn.135_85	maxsbp	maxdbp	minsbp	mindbp	htn	sys.htn	dia.htn	nhalf
gosong01	1	82.1246	20.9321	0	0	10	142.3	99.6	5.85093	16.4195	9	9	10	148	116	132	60	1	1	1	5
gosong02	1	74.6804	23.7387	0	1	19	134.579	77.4211	6.92271	5.08064	10	2	10	149	88	123	71	0	0	0	10
gosong03	0	74.6886	21.6333	0	0	10	132.6	98.2	30.0747	28.7433	8	9	9	149	130	49	26	1	0	1	5
gosong04	0	74.0424	28.8805	0	0	19	133.211	85.4211	16.393	7.22892	8	9	11	167	101	112	76	1	0	1	10
gosong05	0	73.347	26.4024	0	0	22	133.455	84.8182	13.6617	6.54389	8	9	11	162	100	106	71	0	0	0	11
gosong06	1	72.5585	27.1621	0	0	20	148.7	92.65	20.6986	14.3133	17	13	18	195	125	108	66	1	1	1	10
gosong07	1	71.8658	24.5906	0	0	20	126.85	78.75	9.86368	5.02494	5	2	5	148	89	112	72	0	0	0	10
gosong08	1	71.6578	18.662	0	0	30	129.967	81.8667	11.6604	6.72993	12	10	14	164	94	114	64	0	0	0	15
gosong09	0	71.6605	25.3378	0	0	17	136.529	101.118	9.76677	12.747	13	14	15	149	122	110	79	1	1	1	9
gosong10	1	71.3457	18.6671	0	0	24	121.25	81.7083	9.2982	6.17484	3	8	9	136	92	104	66	0	0	0	12
gosong11	1	70.8802	23.7024	1	0	12	128.25	70.3333	11.5847	4.45856	4	0	4	147	77	116	64	0	0	0	6
gosong12	0	70.7981	24.5906	0	0	17	148.471	90.0588	10.9722	5.85737	16	13	17	174	103	131	80	1	1	1	9
gosong13	0	70.5955	20.7198	0	0	22	107.909	72	10.2906	6	0	0	0	126	80	85	61	0	0	0	11
gosong14	1	70.5599	30.4834	0	0	21	129.952	83.7143	6.97478	4.91063	5	12	13	144	91	117	72	0	0	0	11
gosong15	1	70.5298	24.9212	0	0	32	134.5	75.7188	11.8485	5.44316	14	0	14	159	83	112	61	0	0	0	16
gosong16	0	70.475	36.7309	0	0	19	115.316	77.1053	12.0557	7.10942	0	2	2	134	88	93	62	0	0	0	10
gosong17	0	70.2231	24.1127	0	0	8	163.5	89.375	15.7208	12.8167	8	4	8	192	115	144	77	1	1	1	4
gosong18	1	69.5989	27.0851	0	0	23	163.87	107.217	26.372	27.9105	20	21	21	239	212	105	73	1	1	1	12
gosong19	1	69.6482	25.4028	0	0	24	109.208	75.6667	7.98357	6.12668	0	2	2	120	86	92	61	0	0	0	12
gosong20	0	69.6263	25.4767	0	0	11	125.545	73.5455	7.63366	3.98406	1	0	1	141	79	118	65	0	0	0	6
gosong21	0	69.6947	22.8336	0	0	17	128.824	85.4118	12.6057	8.90968	7	9	9	147	97	113	70	1	0	1	9
gosong22	1	70.4613	29.6875	1	0	6	136	85.3333	5.83095	1.75119	4	3	6	144	88	128	84	1	1	1	3
gosong23	0	68.3203	31.2488	0	0	19	142.947	89.7895	12.0438	5.9961	13	15	16	164	102	124	80	1	1	1	10
gosong24	0	67.8303	24.298	0	0	19	119	51.9474	21.6384	9.24045	4	0	4	144	64	41	24	0	0	0	10
gosong25	1	67.4333	23.1473	0	0	10	121.2	81.1	19.0134	13.3704	4	5	6	141	92	87	46	0	0	0	5
gosong26	1	67.1814	22.9421	0	0	20	143.95	81.45	14.9084	6.40292	16	6	16	176	97	118	73	1	1	0	10
gosong27	1	66.9103	18.4265	0	0	21	113.095	78.7143	8.8764	9.04512	0	6	6	132	92	97	62	0	0	0	11
gosong28	0	66.6968	24.1437	0	0	14	128.071	87.5	11.6913	5.36011	5	9	9	148	96	111	80	1	0	1	7
gosong29	1	66.5161	22.6757	0	0	21	128.429	85.3333	7.7238	4.72582	3	11	11	150	95	116	76	1	0	1	11
gosong30	1	66.3546	21.2183	0	0	22	100.727	73.6818	4.7024	3.38605	0	0	0	110	80	90	68	0	0	0	11
gosong31	1	66.5133	25.8586	0	0	21	140.571	83.381	9.50564	4.72733	15	9	18	159	92	128	73	1	1	0	11
gosong32	0	66.3847	27.6803	0	0	33	154.636	99.0303	22.1653	10.3062	25	29	29	191	113	108	74	1	1	1	17
gosong33	1	66.0917	27.4449	0	0	20	122.95	75.5	12.8697	10.3135	4	4	5	141	90	97	48	0	0	0	10
gosong34	0	65.9849	23.9224	0	0	16	111.438	72.4375	13.5989	6.20719	1	0	1	135	82	75	58	0	0	0	8
gosong35	0	65.4976	20.0352	0	0	22	116.545	75.5909	9.9318	4.04333	0	0	0	134	84	96	65	0	0	0	11
gosong36	1	85.4949	23.255	0	0	12	125.75	82.1667	7.53326	5.18448	2	4	4	140	92	115	73	0	0	0	6
gosong37	0	65.1964	26.216	0	0	13	115.769	76.1538	9.9679	4.96397	0	0	0	128	84	100	65	0	0	0	7
gosong38	0	65.0103	23.7134	1	0	19	142.211	77.6316	7.39053	3.81824	17	1	17	155	88	124	72	1	1	0	10
gosong39	1	64.5311	24.8898	0	0	18	115.111	67.4444	6.39751	3.86876	0	0	0	126	74	103	60	0	0	0	9
gosong40	0	64.5448	19.6038	0	0	21	139.095	93.0952	10.0145	7.70003	17	18	18	150	106	116	78	1	1	1	11
gosong41	0	64.5311	33.3205	0	0	25	119.2	71.44	11.5434	4.99233	3	0	3	150	80	100	57	0	0	0	13
gosong42	0	64.4654	27.3034	0	0	21	130.095	88.5714	6.95633	4.05674	5	18	18	145	94	116	80	1	0	1	11
gosong43	0	63.5072	22.5069	1	0	13	117.923	69.8462	10.563	5.80009	0	0	0	130	79	101	59	0	0	0	7
gosong44	0	63.3457	25.9106	1	0	10	139.7	79.6	11.5955	5.05964	7	2	7	152	86	117	70	1	1	0	5
gosong45	0	62.9185	32.4354	1	0	21	140.095	90.7143	9.29465	4.46254	14	20	20	160	100	128	81	1	1	1	11
gosong46	0	61.9521	23.6379	0	0	25	114.48	69.88	11.5149	7.87041	0	0	0	128	81	71	40	0	0	0	13
gosong47	0	61.7248	21.4903	0	0	21	120	78.9524	10.6724	8.59928	1	5	5	142	98	103	64	0	0	0	11
gosong48	1	NA	20.9321	0	0	19	131.842	78.6842	11.3542	8.95081	6	4	8	164	104	114	63	0	0	0	10
gosong49	0	60.4408	25.6068	0	1	18	114.944	73.6111	8.49548	5.20338	1	0	1	136	84	102	63	0	0	0	9
gosong50	0	60.4463	23.9257	0	0	18	134.778	86	10.9842	6.52597	9	11	12	160	101	115	76	1	0	1	9
gosong51	0	58.8556	23.4429	0	0	17	124.824	83.7059	17.343	9.5313	4	7	7	172	101	98	70	0	0	0	9
gosong52	1	58.4093	25.4017	0	0	21	134.476	86.1429	8.09703	5.74705	9	11	13	152	100	121	78	1	0	1	11
gosong53	1	57.8125	23.3242	0	0	16	132.188	80.5625	10.1864	5.64469	5	3	6	154	92	116	71	0	0	0	8
gosong54	0	57.0924	22.6667	0	0	20	114.6	82.4	7.08891	4.84931	0	7	7	132	92	103	76	0	0	0	10
gosong55	0	56.9418	23.2133	0	1	21	119.19	70.1429	9.8824	6.42095	2	0	2	136	84	93	57	0	0	0	11
gosong56	1	56.7967	25.3968	0	0	17	168.118	107.824	15.1859	8.07957	17	17	17	198	120	145	92	1	1	1	9
gosong57	1	55.6605	26.8166	1	0	21	123.619	85.0476	6.49212	5.31485	2	8	9	140	99	116	78	1	0	1	11
gosong58	1	55.0965	24.6546	0	0	22	118.955	76.3636	5.35837	3.77391	0	0	0	132	83	111	69	0	0	0	11
gosong59	0	54.9131	29.3803	0	0	20	132.65	94.05	11.1746	13.6323	10	15	17	148	127	107	73	1	0	1	10
gosong60	1	NA	20.9321	0	0	21	117.667	79.3333	10.8919	5.25674	1	2	2	149	90	96	68	0	0	0	11
gosong61	0	54.2259	26.6696	0	0	17	122.471	81.6471	7.73884	5.63406	2	6	7	136	90	108	70	0	0	0	9
gosong62	1	54.1656	25.8115	0	0	4	113	77.75	0.816497	3.30404	0	0	0	114	81	112	74	0	0	0	2
gosong63	1	54.0205	23.2917	0	0	21	120.429	73.7619	9.75998	8.37201	2	2	3	137	101	102	64	0	0	0	11
gosong64	1	53.3607	25.5501	0	0	21	112.238	76.5238	5.28114	4.35453	0	0	0	122	84	104	68	0	0	0	11
gosong65	1	52.6817	29.5818	0	0	33	130	90.3939	17.5018	12.5373	10	24	24	177	111	103	57	1	0	1	17
gosong66	0	52.4764	24.4975	0	0	20	128.2	87.45	9.02978	4.9255	5	13	13	148	97	115	80	1	0	1	10
gosong67	0	52.4189	30.0624	0	0	21	120.095	81	8.63658	5.1672	1	6	6	140	88	108	72	0	0	0	11
gosong68	0	51.7919	23.5304	0	0	21	104.857	72.0952	7.45846	3.78027	0	0	0	117	80	91	64	0	0	0	11
gosong69	0	51.6851	19.6283	0	0	14	143.214	96.9286	12.0714	8.15677	11	13	13	162	112	116	80	1	1	1	7
gosong70	0	51.3128	20.0416	0	0	19	101.684	69.4211	5.86944	4.69415	0	0	0	111	81	90	60	0	0	0	10
gosong71	0	51.1431	23.7253	0	0	21	111.905	75.5238	5.36568	5.48287	0	0	0	123	84	102	66	0	0	0	11
gosong72	1	50.4203	28.7347	0	0	5	102.4	63	21.7555	18.5472	1	1	1	140	96	85	52	0	0	0	3
gosong73	1	49.5578	27.3797	0	0	22	115.364	79.4091	7.41649	6.73059	0	6	6	128	89	99	60	0	0	0	11
gosong74	0	45.9083	19.7055	0	0	18	105.278	75.8333	6.8925	4.23223	0	0	0	116	83	91	68	0	0	0	9
gosong75	1	42.8939	24.1544	0	0	19	116.737	85.3684	5.6847	5.21973	0	10	10	128	97	110	78	1	0	1	10
gosong76	1	40.8487	18.8468	0	0	18	118.833	81.8889	7.38241	6.4067	1	7	7	136	93	107	69	0	0	0	9
gosong77	1	40.5585	26.2188	0	0	15	111.867	70.9333	9.59067	7.59198	0	0	0	124	80	94	55	0	0	0	8
gosong78	0	38.4969	23.597	0	0	17	116.941	74.5882	7.77392	4.13912	0	1	1	132	85	106	69	0	0	0	9
gosong79	1	37.5277	22.2222	0	0	11	132.909	75.3636	11.8022	3.74894	4	0	4	150	81	116	68	0	0	0	6
gosong80	0	37.4565	23.3726	0	0	18	109.167	72.9444	7.07315	7.89246	0	1	1	132	93	99	60	0	0	0	9
gosong81	0	50.0808	29.5556	0	0	55	143.291	79.0909	13.7997	7.77049	43	9	43	173	106	108	60	1	1	0	28
kumwang01	0	52.6982	26.2227	0	0	14	139.5	87.1429	6.39411	4.31201	11	11	14	152	92	131	79	1	1	1	7
kumwang02	0	63.707	21.6413	0	0	20	108	66.7	16.2998	13.8226	4	4	4	142	94	92	52	0	0	0	10
kumwang03	0	42.7214	22.8928	0	0	9	114.333	72.1111	11.225	7.83333	1	1	1	139	85	104	64	0	0	0	5
kumwang04	0	51.6578	24	0	0	25	128.28	87.24	8.19817	4.51184	4	18	18	152	97	115	78	1	0	1	13
kumwang05	1	58.0342	26.6406	0	0	26	123.923	82	8.85855	4.41814	5	6	8	144	89	110	71	0	0	0	13
kumwang06	1	70.4914	19.5059	0	0	22	118.136	82.8182	6.0968	3.20173	0	6	6	131	88	109	77	0	0	0	11
kumwang07	1	56.1123	20.4783	0	0	12	113.083	68.6667	7.32937	3.14305	0	0	0	127	76	104	64	0	0	0	6
kumwang08	0	47.8138	26.3059	0	1	23	165.522	112.478	18.0627	7.76279	23	23	23	197	127	138	100	1	1	1	12
kumwang09	0	60.7201	29.3051	0	0	19	155.368	100.526	9.12999	8.75194	19	19	19	172	130	140	91	1	1	1	10
kumwang10	0	45.1335	23.833	0	0	21	107.905	79	8.31808	4.49444	0	2	2	126	90	94	72	0	0	0	11
kumwang11	1	50.3326	20.4959	0	0	19	101.632	65.1053	7.13528	8.63388	0	0	0	120	76	92	47	0	0	0	10
kumwang12	1	63.9507	23.6614	0	0	17	135.235	77.8235	15.8845	10.0077	10	4	10	152	93	96	58	1	1	0	9
kumwang13	0	63.4442	21.9839	0	0	19	140	90.2632	15.9583	16.4683	11	11	13	176	152	120	79	1	1	1	10
kumwang14	1	54.9706	28.4703	0	0	21	119.429	82.2381	12.2334	7.77756	2	10	10	152	93	100	67	0	0	0	11
kumwang15	0	44.7064	22.0703	0	0	16	111.312	69.8125	9.08272	9.18128	0	1	1	132	87	98	56	0	0	0	8
kumwang16	0	71.4962	22.213	0	0	22	149.318	78.1818	10.0446	6.34437	21	2	21	171	96	130	68	1	1	0	11
kumwang17	1	66.8255	22.1367	0	0	18	121.222	76.5556	12.2789	7.3262	2	2	4	142	89	99	61	0	0	0	9
kumwang18	1	60.8624	23.8123	0	0	19	130.947	82.1053	11.7449	15.6486	6	2	6	168	144	111	68	0	0	0	10
kumwang19	0	57.5524	24.6836	0	0	20	117.55	82.75	6.56526	4.85446	0	8	8	133	91	108	75	0	0	0	10
kumwang20	0	43.6085	28.0401	0	0	21	144.476	95.3333	9.20119	6.61312	18	20	20	168	106	128	84	1	1	1	11
kumwang21	1	48.7173	29.5525	0	0	20	156.7	98	23.0676	16.6544	15	13	15	191	126	118	71	1	1	1	10
kumwang22	1	51.0637	24.1672	1	0	14	110.571	75.6429	4.68573	4.37839	0	0	0	118	84	102	70	0	0	0	7
kumwang23	0	46.8912	27.1816	0	0	25	123.64	79.12	10.2951	5.07707	5	4	6	142	89	102	69	0	0	0	13
kumwang24	0	62.4613	23.9334	0	0	18	125.333	79.6111	8.41567	4.94843	3	2	3	138	88	109	72	0	0	0	9
kumwang25	0	69.8453	23.9257	0	0	20	122.45	68.15	11.4821	7.86916	3	1	4	139	88	97	56	0	0	0	10
kumwang26	0	65.7495	25.4459	1	1	19	127.579	71	7.17492	4.71405	4	0	4	137	82	111	63	0	0	0	10
kumwang27	1	64.8925	27.7323	0	0	20	125	82.2	13.5491	8.26916	4	8	8	145	98	95	68	0	0	0	10
kumwang28	0	58.9459	23.5237	0	0	19	113.105	79	12.8145	9.33928	0	4	4	132	92	89	57	0	0	0	10
kumwang29	1	65.9357	21.9261	0	0	13	139.154	81.5385	17.9111	6.22649	7	3	7	172	92	116	74	1	1	0	7
kumwang30	0	38.5982	24.4905	0	0	12	111.333	79.6667	10.0393	7.49949	0	4	4	129	92	95	69	0	0	0	6
kumwang31	1	65.8015	22.913	0	0	22	117.364	75.5909	7.65037	4.55296	0	0	0	129	81	100	64	0	0	0	11
kumwang32	0	51.5619	26.0584	0	1	24	118.833	73.8333	8.20746	5.346	2	2	2	143	89	104	66	0	0	0	12
kumwang33	1	51.1102	18.9386	0	0	20	110.1	66.45	10.7747	7.45848	0	0	0	129	81	92	52	0	0	0	10
kumwang34	0	65.1554	35.4273	0	0	20	113.4	75.55	5.81649	4.63936	0	0	0	125	84	104	67	0	0	0	10
kumwang35	0	52.2163	26.3879	0	0	20	122.4	84.85	4.00526	3.39155	0	5	5	131	97	115	82	0	0	0	10
kumwang36	1	70.7515	22.8529	0	0	11	130.818	92.1818	14.7974	15.6513	4	9	9	166	137	115	80	1	0	1	6
kumwang37	0	71.5784	20.4072	0	0	21	124.286	79.8095	8.33752	4.56748	2	3	4	142	88	108	72	0	0	0	11
kumwang38	0	46.3025	24.9199	0	0	47	111	67.8511	9.57351	5.75205	1	0	1	136	82	92	56	0	0	0	24
kumwang39	0	44.7009	26.2222	0	0	28	126.679	86.5357	6.68361	6.69152	4	19	20	142	100	111	71	1	0	1	14
kumwang40	1	52.9254	27.906	1	0	20	140.95	89.1	7.99655	5.96393	15	14	17	155	100	128	81	1	1	1	10
kumwang41	0	59.718	23.4441	0	0	21	154.952	96.4762	6.51518	4.74994	21	20	21	166	102	145	84	1	1	1	11
kumwang42	0	52.7611	24.4646	0	0	22	129.273	84.4091	12.4602	5.74588	6	11	11	152	93	110	74	0	0	0	11
kumwang43	0	61.8125	28.4166	0	0	20	126.5	89.85	8.46976	5.86044	2	16	16	138	98	106	76	1	0	1	10
kumwang44	0	61.4757	23.4221	0	0	21	126.333	83.8571	7.74166	4.8196	4	7	8	141	96	112	74	0	0	0	11
kumwang45	0	52.0411	24.9836	0	0	20	142.15	93.6	11.1557	5.35478	15	20	20	166	107	126	86	1	1	1	10
kumwang46	0	57.5797	30.5142	0	1	19	109.895	68.1053	10.4291	5.38408	1	0	1	136	82	97	60	0	0	0	10
kumwang47	1	69.5277	18.0469	0	0	20	127.15	69.05	7.68645	5.80812	3	0	3	146	80	112	56	0	0	0	10
kumwang48	1	65.1499	22.9218	1	0	5	116	77.4	4.1833	4.15933	0	0	0	121	84	112	74	0	0	0	3
kumwang49	1	52.8159	23.03	0	0	21	122.048	74.9524	9.1841	4.60951	3	1	3	140	85	107	67	0	0	0	11
kumwang50	1	25.2676	32.3265	0	0	19	157.737	101.053	10.0876	12.367	19	16	19	177	122	143	75	1	1	1	10
kumwang51	1	65.3114	21.9377	0	0	17	128.176	84	15.1296	9.0967	7	11	11	152	97	102	67	0	0	0	9
kumwang52	1	62.2396	22.3133	0	0	25	131.76	77.36	6.61614	3.63868	9	0	9	141	83	117	69	0	0	0	13
kumwang53	0	37.9822	19.1844	0	0	6	119.333	78.5	7.39369	8.93868	0	1	1	129	93	107	67	0	0	0	3
kumwang54	1	46.1355	23.0077	0	0	12	103.417	66.5833	4.88892	3.94181	0	0	0	115	75	96	60	0	0	0	6
kumwang55	1	51.7755	22.3478	0	0	13	105.615	66.2308	7.45585	8.29813	0	0	0	118	80	96	54	0	0	0	7
kumwang56	0	44.1643	31.4844	0	0	16	120.5	72	6.89928	2.92119	0	0	0	130	76	108	67	0	0	0	8
kumwang57	1	54.601	21.3774	1	0	26	113.385	72.5769	10.3849	5.01337	1	0	1	138	84	92	61	0	0	0	13
kumwang58	1	67.7043	22.4221	0	0	21	129.143	92.5714	9.42489	4.0444	5	21	21	152	100	116	86	1	0	1	11
kumwang59	0	46.3901	23.4952	0	0	41	105.78	62.9756	9.42739	16.3439	0	4	4	124	86	84	42	0	0	0	21
kumwang60	0	52.6762	22.5161	0	0	20	119.05	82.15	8.62356	5.11216	1	6	6	138	91	107	74	0	0	0	10
kumwang61	0	58.0589	22.213	0	0	20	117.4	75	16.1226	8.95603	2	3	4	139	92	63	50	0	0	0	10
kumwang62	0	64.8131	24.7582	0	0	18	140.333	90.5556	8.81843	6.46458	14	15	16	161	103	127	82	1	1	1	9
kumwang63	0	63.8631	21.0828	0	0	7	115.714	76.2857	14.8067	9.10521	0	1	1	133	88	93	63	0	0	0	4
kumwang64	1	31.0965	28.7274	0	0	16	128.938	83.1875	12.5723	8.19934	8	9	9	144	95	101	67	0	0	0	8
kumwang65	1	36.115	273.988	0	0	18	140.833	92.7222	13.3956	5.22219	13	18	18	166	105	109	85	1	1	1	9
kumwang66	1	45.4648	19.5418	0	0	15	128.467	87.5333	18.3142	22.1226	3	8	8	183	160	112	69	1	0	1	8
kumwang67	1	60.1177	24.4261	0	0	17	107.118	73.5294	8.73128	5.17346	0	0	0	129	84	96	68	0	0	0	9
kumwang68	1	42.5517	25.2082	0	0	9	110.556	68.7778	6.89404	6.57225	0	0	0	121	77	99	58	0	0	0	5
kumwang69	1	52.9719	27.4302	0	0	20	115.4	79.45	8.11367	3.25212	1	2	3	136	86	103	74	0	0	0	10
dongo01	0	65.7385	32.4622	0	1	25	156.92	93.6	14.62	5.8238	21	22	22	179	101	124	80	1	1	1	13
dongo02	1	NA	20.9321	0	0	27	92.6667	59.4815	10.2919	6.32681	0	0	0	112	70	70	45	0	0	0	14
dongo03	0	38.8145	21.6041	0	0	19	104.789	68.4737	6.11536	5.22141	0	0	0	122	78	96	62	0	0	0	10
dongo04	1	51.0363	33.3146	0	0	25	181.44	108.24	12.4769	7.01356	25	25	25	203	125	156	96	1	1	1	13
dongo05	1	59.6879	24.4711	0	0	24	121.5	79.625	8.09724	6.68426	2	4	4	136	89	104	65	0	0	0	12
dongo06	0	45.5578	21.3675	0	0	20	109.75	67	7.1736	6.79009	0	0	0	127	80	96	54	0	0	0	10
dongo07	1	58.9678	23.4586	0	0	21	115.857	66.9524	11.5295	10.3028	2	0	2	140	82	93	52	0	0	0	11
dongo08	0	46.4394	22.8231	0	0	16	130.375	81.3125	32.2653	36.0938	5	3	6	239	208	92	55	0	0	0	8
dongo09	0	62.694	21.7784	0	0	2	105	67	9.89949	1.41421	0	0	0	112	68	98	66	0	0	0	1
dongo10	0	50.0315	22.7074	0	0	20	114.35	65.55	7.70014	4.11	1	0	1	135	75	100	56	0	0	0	10
dongo11	0	34.7543	19.6311	0	0	20	91.35	60.55	5.61272	3.74833	0	0	0	106	69	84	54	0	0	0	10
dongo12	0	57.2402	24.2665	0	0	42	97.5238	65.381	6.62309	4.53685	0	0	0	112	73	84	53	0	0	0	21
dongo13	0	43.2033	26.2222	0	0	24	105.125	69.0417	4.96345	4.0052	0	0	0	114	76	96	60	0	0	0	12
dongo14	1	46.1629	23.2438	1	0	21	129.476	78.6667	11.2633	9.43045	8	7	11	148	89	105	64	0	0	0	11
dongo15	0	49.2348	21.9146	0	0	26	114.077	64.6538	9.29052	5.52045	0	0	0	134	76	102	56	0	0	0	13
dongo16	0	44.2437	25.8478	0	0	22	108.045	59.2273	5.74437	9.66058	0	0	0	121	72	98	36	0	0	0	11
dongo17	0	58.319	23.4489	0	0	21	117.429	74.9524	12.4401	9.70812	2	5	5	144	93	97	62	0	0	0	11
dongo18	1	62.1602	24	0	0	24	107.458	67.6667	11.0058	10.5074	1	1	1	140	111	87	56	0	0	0	12
dongo19	0	42.319	23.4948	0	0	20	115.4	73.95	5.08248	4.90408	0	0	0	127	83	107	67	0	0	0	10
dongo20	0	64.6543	27.4714	0	0	24	141.708	89.875	21.6182	11.9357	18	19	20	168	112	80	59	1	1	1	12
dongo21	0	40.2437	22.3757	0	1	23	125.783	86.0435	9.94968	8.5837	4	14	14	140	99	95	56	1	0	1	12
dongo22	1	46.9076	21.0938	0	0	21	115.286	77.8571	5.35857	6.66548	0	2	2	127	91	106	62	0	0	0	11
dongo23	1	48.1232	26.0375	0	0	26	125.462	85.9231	4.69238	4.40838	2	18	18	139	97	119	76	1	0	1	13
dongo24	1	44.4764	20.5693	0	0	20	117.35	70.25	12.9463	4.10231	2	0	2	140	78	86	64	0	0	0	10
dongo25	1	33.2402	24.2215	0	0	2	148	108.5	1.41421	12.0208	2	2	2	149	117	147	100	1	1	1	1
dongo26	1	52.2957	20.984	1	1	21	117.381	74.7619	4.73789	4.18216	0	0	0	123	84	107	65	0	0	0	11
dongo27	1	71.2142	22.0829	0	0	29	149.69	82.3103	22.4406	9.98607	23	14	23	200	100	109	60	1	1	0	15
dongo28	1	75.0938	26.7556	0	0	27	153.852	77.7407	11.2377	6.03574	27	3	27	186	88	136	68	1	1	0	14
dongo29	1	52.4353	24.1014	1	0	16	134.312	84.5	10.9527	6.55235	8	7	9	153	97	116	76	0	0	0	8
dongo30	0	44.7556	22.4451	0	0	21	117.952	70.7619	9.37804	8.77442	1	0	1	136	84	100	52	0	0	0	11
dongo31	0	71.7207	23.7395	0	0	16	134.625	85.0625	12.6485	6.42359	8	7	9	163	96	115	76	1	0	1	8
dongo32	1	50.2122	27.2061	0	0	10	139.8	85.2	8.9169	8.03879	7	6	7	152	95	128	68	1	1	1	5
dongo33	1	61.5633	24.0828	0	0	28	128.464	86.9643	11.9984	11.6666	8	16	17	156	143	110	72	1	0	1	14
dongo34	1	42.8008	20.0346	0	0	19	144.053	96.3684	9.82329	11.3295	17	17	19	165	115	124	68	1	1	1	10
dongo35	1	46.7461	24.6094	0	1	29	128.103	80.2759	10.9784	7.6667	8	7	9	153	97	115	64	0	0	0	15
dongo36	0	49.2047	24.0346	0	0	14	114.786	83.7857	5.63203	4.00343	0	6	6	126	90	104	74	0	0	0	7
dongo37	0	70.4778	24.6568	0	0	37	124.919	84.4865	15.8314	15.198	10	18	20	172	144	92	49	0	0	0	19
dongo38	0	55.0445	28.6215	0	0	10	137.1	75.5	13.916	8.07259	7	1	7	160	94	110	62	1	1	0	5
dongo39	0	69.3689	27.3399	0	0	18	109.333	62.7778	6.791	2.43879	0	0	0	120	66	97	57	0	0	0	9
dongo40	1	38.8446	18.7328	0	0	19	109.842	65.3684	6.44001	6.02965	0	0	0	120	76	96	52	0	0	0	10
dongo41	0	73.5332	25.9645	0	0	5	139.2	66	8.92749	5.61249	4	0	4	150	74	126	60	1	1	0	3
dongo42	0	34.3573	21.3039	0	0	20	117.95	74.7	7.61214	7.21913	0	0	0	130	84	102	60	0	0	0	10
dongo43	0	44.4956	31.7291	1	1	28	122.964	79.6786	8.77489	10.085	3	12	14	144	91	105	52	0	0	0	14
dongo44	0	65.514	19.9636	1	0	15	136	78.0667	8.24621	4.54292	9	2	9	151	87	124	72	1	1	0	8
dongo45	1	52.0684	22.7732	0	1	23	117.87	78.7826	8.12574	4.77642	1	3	3	136	89	104	71	0	0	0	12
dongo46	0	38.9733	18.1346	0	0	20	96.3	61.9	5.64847	6.85105	0	0	0	112	80	87	53	0	0	0	10
dongo47	0	40.271	22.249	0	0	26	129.538	85.4231	22.6367	18.7727	8	8	8	176	130	104	59	1	0	1	13
dongo48	0	52.1533	27.4048	0	0	21	123.476	83.3333	8.38224	5.60654	3	9	9	136	92	109	75	0	0	0	11
dongo49	1	55.2635	17.6327	1	0	22	120.682	71.4091	18.9395	20.6205	4	1	4	167	156	93	46	0	0	0	11
dongo50	0	80.4709	18.6107	0	0	20	120.15	74.8	15.0238	10.7046	3	3	5	152	103	94	54	0	0	0	10
dongo51	1	32.5585	20.4544	0	0	23	116.13	70.913	17.2766	20.8761	2	2	2	176	135	96	50	0	0	0	12
dongo52	0	40.449	28.8469	0	0	19	136.211	87.7895	8.63828	4.83711	12	15	17	154	96	121	76	1	1	1	10
dongo53	0	47.7399	31.4462	0	0	21	105.19	57.1905	8.60011	6.3057	0	0	0	124	68	94	46	0	0	0	11
dongo54	1	49.5305	21.4692	0	0	16	130.125	81	8.26136	5.34166	5	3	6	145	92	116	72	0	0	0	8
dongo55	1	67.7317	25.568	0	0	70	127.129	84.2	9.2312	5.60952	10	34	34	164	98	104	70	0	0	0	35
dongo56	1	67.655	25.568	0	0	24	132.625	88.625	8.74674	5.18201	9	16	18	151	97	115	76	1	0	1	12
dongo57	0	65.5496	28.1684	0	0	24	140.833	86.4583	16.0561	10.0043	15	14	17	168	102	92	52	1	1	1	12
dongo58	1	53.4812	27.7008	0	0	21	118.952	74.7619	8.34551	6.07375	1	2	3	137	86	105	63	0	0	0	11
dongo59	0	34.9487	18.4042	0	0	21	124.095	78.7143	12.2348	8.19843	3	5	6	143	97	84	60	0	0	0	11
dongo60	0	38.527	29.7778	0	0	20	134.7	91.15	12.7902	7.34327	6	17	17	161	108	118	80	1	0	1	10
dongo61	1	67.4415	26.8123	0	0	35	112.771	68.6571	9.53966	5.09869	1	0	1	136	80	88	53	0	0	0	18
dongo62	0	64.8214	29.6749	0	0	22	141.682	86.3182	8.3972	7.07367	18	13	19	155	97	122	71	1	1	1	11
dongo63	1	40.5257	24.1115	0	0	13	117.077	78.0769	9.15115	7.08827	1	3	4	135	90	100	67	0	0	0	7
dongo64	1	70.0178	26.5625	0	0	20	129.55	79.2	6.87846	6.20356	6	6	8	138	89	116	70	0	0	0	10
dongo65	1	67.2553	24.0138	0	0	18	140.333	67	13.4733	4.63998	13	0	13	178	77	121	60	1	1	0	9
dongo66	1	39.4415	25.3934	1	0	16	122.688	79.8125	8.06407	5.95784	1	4	5	135	89	108	69	0	0	0	8
dongo67	0	48.7803	25.4366	1	0	10	148.1	94.9	7.325	5.17365	10	10	10	160	106	140	88	1	1	1	5
dongo68	1	58.642	21.0876	0	0	16	118.062	73.25	8.84284	4.72582	0	0	0	133	82	104	64	0	0	0	8
dongo69	0	68.6324	22.2605	0	0	22	153.682	80.9545	14.3937	5.74437	20	4	21	193	96	129	70	1	1	0	11
dongo70	0	67.7591	23.6319	0	0	24	122.417	64.4583	8.939	6.46717	1	0	1	136	75	92	49	0	0	0	12
dongo71	1	60.6489	25.7228	0	0	21	137.714	89.6667	9.29593	5.49848	13	15	17	157	99	120	82	1	1	1	11
dongo72	0	58.9624	25.4767	0	0	16	135.688	92.5625	11.4584	6.96629	10	13	15	153	106	112	81	1	1	1	8
dongo73	0	40.6571	26.4463	0	0	21	121.238	63.619	6.47229	4.71674	1	0	1	136	73	112	56	0	0	0	11
dongo74	1	66.8884	25.6373	1	0	6	138.833	80.3333	5.49242	4.4121	5	1	5	147	87	132	76	1	1	0	3
dongo75	0	42.1875	24.2188	0	0	34	126.412	81.3529	14.7938	9.54696	8	12	14	161	100	95	61	0	0	0	17
dongo76	0	67.7481	24.5981	0	0	20	141.15	84.5	9.50498	4.34681	16	9	16	165	91	120	74	1	1	0	10
dongo77	1	71.0883	28.858	0	0	20	123.75	74.05	9.54698	5.76263	3	0	3	140	81	106	61	0	0	0	10
dongo78	0	39.4223	19.6506	0	0	18	107.556	64.6111	9.3634	4.92459	0	0	0	122	79	91	58	0	0	0	9
dongo79	1	40.3203	23.3204	1	1	7	128.857	86.1429	7.71208	5.1455	2	3	3	140	93	120	80	1	0	1	4
dongo80	1	44.3888	24.8971	0	0	17	145.824	90.3529	8.81217	7.10582	15	12	15	161	104	128	80	1	1	1	9
dongo81	0	65.7906	25.4909	0	0	15	138.067	84.2667	9.12975	3.23964	8	8	9	155	88	127	80	1	1	0	8
dongo82	1	47.2854	24.3824	0	0	19	124.368	80.7368	18.9332	17.4796	6	5	8	156	143	88	57	0	0	0	10
dongo83	0	50.2286	17.5002	0	0	19	114.158	71.0526	7.78362	6.06881	0	0	0	129	83	99	60	0	0	0	10
dongo84	0	32.1451	24.3728	0	0	21	119.238	72.9524	9.95944	9.74411	1	2	3	135	88	100	51	0	0	0	11
dongo85	0	52.9692	22.0703	0	0	14	107.5	72.2857	11.0367	5.34111	0	0	0	131	81	91	62	0	0	0	7
dongo86	1	46.1081	22.2041	0	0	9	120	80.7778	16.7481	16.2694	2	4	4	143	102	92	56	0	0	0	5
dongo87	0	57.8015	27.4756	0	0	13	118.692	82.6154	9.09565	5.43965	1	5	5	138	92	105	76	0	0	0	7
dongo88	0	65.7248	24.5687	0	1	20	118.45	80.65	9.37789	6.99078	0	7	7	132	92	100	65	0	0	0	10
dongo89	0	56.8433	23.4221	0	0	25	118.04	72.4	12.344	9.84039	2	3	3	136	86	88	51	0	0	0	13
dongo90	0	37.7823	20.3428	0	0	18	105.389	65.3889	7.96418	6.42732	0	0	0	128	75	93	48	0	0	0	9
dongo91	0	62.7515	22.3948	0	0	14	124	85.2857	12.4159	7.40508	3	7	7	148	99	104	76	1	0	1	7
dongo92	0	36.6571	21.4368	0	0	18	115.667	65.5	5.6983	7.2538	0	0	0	125	77	104	49	0	0	0	9
dongo93	1	57.6044	26.2067	0	1	27	150.333	102.889	9.50304	8.04475	26	26	26	168	115	122	80	1	1	1	14
dongo94	1	55.0664	23.8315	0	0	13	113.538	73	7.54559	2.91548	0	0	0	128	78	102	68	0	0	0	7
dongo95	0	73.3142	17.4449	0	0	28	120.643	74.9286	19.4388	7.49285	8	3	8	156	88	91	60	0	0	0	14
saneum01	0	59.6222	25.1405	0	0	20	124.9	81.65	8.84903	6.69072	2	6	6	143	94	107	67	0	0	0	10
saneum02	0	58.9076	24.5333	1	0	22	136	78.3182	14.3494	5.94728	10	4	10	186	89	115	70	1	1	0	11
saneum03	1	85.7413	20.9321	0	0	26	106	68.6154	14.3972	6.52427	1	1	1	152	86	87	59	0	0	0	13
saneum04	0	47.1814	22.9421	0	0	20	97.4	58.3	6.48399	4.56647	0	0	0	111	68	88	50	0	0	0	10
saneum05	0	49.4949	25.8065	0	0	23	133.696	84.6087	16.6035	21.2469	8	6	9	196	180	114	70	0	0	0	12
saneum06	0	47.2252	20.9488	0	0	26	99.2308	68.3077	9.31368	6.3231	0	0	0	124	79	82	52	0	0	0	13
saneum07	1	74.3847	22.2137	0	NA	21	155.857	82.0476	11.8376	10.7818	21	8	21	187	97	138	51	1	1	0	11
saneum08	0	66.6146	22.3674	0	0	22	144.818	91.3182	20.0752	8.2945	15	16	18	178	112	96	76	1	1	1	11
saneum09	1	54.1054	23.03	0	0	19	113.053	74.4211	7.01169	4.42613	0	0	0	125	84	100	68	0	0	0	10
saneum10	1	51.3648	21.3039	NA	NA	15	152.667	85.4	16.1452	6.96727	14	8	14	183	96	122	73	1	1	1	8
saneum11	0	40.6653	27.7767	0	0	20	136.1	83.8	15.0854	13.7366	12	10	14	171	128	112	67	1	1	0	10
saneum12	0	48.9692	88.8889	0	0	20	101.05	69.95	6.25321	5.5864	0	0	0	116	79	88	60	0	0	0	10
saneum13	1	37.128	21.9713	0	0	18	132.667	76.2778	18.0359	13.2745	11	5	11	161	91	100	52	0	0	0	9
saneum14	1	60.2355	23.214	0	0	20	130.2	81.2	13.9797	9.84405	8	9	11	158	95	102	64	0	0	0	10
saneum15	1	58.9021	27.1075	0	0	20	141.7	88.6	8.81446	7.11115	15	14	17	158	100	124	75	1	1	1	10
saneum16	0	64.7885	26.9531	0	0	20	141.1	79.35	13.7531	4.17102	14	2	14	163	85	110	70	1	1	0	10
saneum17	1	68.2984	22.7615	0	0	20	148.4	95.8	22.7883	15.8665	18	18	18	176	128	82	54	1	1	1	10
saneum18	1	71.1458	18.591	0	0	21	118.905	78.0476	9.69487	5.23905	0	1	1	132	95	99	68	0	0	0	11
saneum19	1	67.0335	30.7599	0	0	19	140.789	88.1579	12.2908	6.82531	12	13	14	169	98	116	70	1	1	1	10
saneum20	0	54.9733	20.0777	0	0	18	116.778	81.2222	11.0908	8.56501	0	8	8	133	93	96	63	0	0	0	9
saneum21	0	60.7995	24.974	0	0	22	118.591	83.2727	7.9502	6.21198	1	9	9	138	96	101	67	0	0	0	11
saneum22	1	59.5756	27.14	0	0	23	113.043	77.1304	11.7647	8.66185	1	5	5	136	91	86	56	0	0	0	12
saneum23	1	52.8925	21.0772	1	0	20	125.8	71.05	11.3444	5.78996	3	0	3	156	83	105	60	0	0	0	10
saneum24	1	42.2259	25.5593	1	0	23	132.174	88.4348	9.8657	6.8545	11	19	21	150	97	113	68	1	0	1	12
saneum25	1	71.9836	22.2041	NA	NA	27	159.074	100.815	20.3676	23.8699	24	25	25	211	183	130	75	1	1	1	14
saneum26	1	74.8255	23.0469	1	0	15	141.6	81.7333	28.8637	33.027	6	1	6	232	200	114	66	1	1	0	8
saneum27	1	70.1328	22.6757	0	NA	22	111.045	79.1818	11.9063	8.67748	1	6	6	140	95	95	65	0	0	0	11
saneum28	1	48.6242	23.4375	0	1	20	143.45	93.8	15.3228	12.8497	15	17	18	162	110	108	61	1	1	1	10
saneum29	1	28.5996	21.9774	0	NA	18	115.778	67.3333	9.36549	6.65096	1	0	1	141	84	104	59	0	0	0	9
saneum30	0	64.2136	21.8939	0	0	21	114.714	60.9048	8.4507	4.17019	0	0	0	127	70	98	54	0	0	0	11
saneum31	0	55.5784	30.8444	1	0	20	142.75	83.9	16.7548	6.78931	13	8	14	172	104	115	75	1	1	0	10
saneum32	0	55.8686	26.3146	0	0	19	143.684	88.6842	10.3013	5.84097	15	15	16	158	100	122	78	1	1	1	10
saneum33	0	32.4408	29.903	0	0	15	129.667	90.6	20.1553	11.3754	5	11	12	164	112	92	71	1	0	1	8
saneum34	1	62.7077	22.7615	0	0	12	143.25	86.6667	26.126	20.0106	10	4	10	189	136	80	53	1	1	1	6
saneum35	0	73.5469	20.8889	0	0	19	127.632	70.7368	8.0361	5.54619	3	0	3	141	81	108	59	0	0	0	10
saneum36	1	55.2635	23.4586	0	0	18	131.833	86.8889	20.2521	13.6593	8	10	10	172	112	95	62	1	0	1	9
saneum37	0	35.436	NA	0	0	20	114.85	69.65	6.58767	7.25676	0	0	0	124	80	96	51	0	0	0	10
saneum38	1	71.0335	22.5306	0	0	22	122.227	74.2273	9.09176	4.89832	3	1	3	140	85	105	62	0	0	0	11
saneum39	1	69.911	25.9107	0	0	26	153.538	86.0769	7.17903	10.3109	26	12	26	166	127	136	75	1	1	1	13
saneum40	0	49.6099	28.2797	0	NA	20	121.75	80.3	7.67686	7.39203	1	6	7	136	88	108	65	0	0	0	10
saneum41	0	72.9144	25.6837	1	0	22	148.364	83.0455	21.7114	6.1681	16	7	17	205	97	127	73	1	1	0	11
saneum42	1	52.397	17.7855	0	0	21	127.095	90.619	7.71301	5.35235	4	18	18	140	98	111	80	1	0	1	11
saneum43	1	62.1793	25.1572	0	0	41	129.805	84.439	13.5798	8.86862	19	25	26	151	96	100	63	0	0	0	21
saneum44	1	54.4203	24.539	0	0	20	127.15	79.5	8.61623	4.03276	2	2	3	150	89	113	69	0	0	0	10
saneum45	1	66.7899	25.2092	0	0	21	126.762	83.7619	8.20308	9.36966	3	11	11	140	96	112	60	0	0	0	11
saneum46	0	79.9124	19.8811	0	0	21	115.048	56.619	12.9363	6.3677	2	0	2	138	69	85	44	0	0	0	11
saneum47	1	64.3258	23.6244	0	0	40	118.65	79.9	12.6725	7.08483	3	10	12	156	93	100	66	0	0	0	20
saneum48	0	49.5907	22.8906	0	NA	20	124.95	90.1	12.2151	10.4826	5	15	15	150	128	103	77	1	0	1	10
saneum49	0	72.9199	26.0021	0	NA	21	122	66.2857	12.486	9.47704	3	0	3	148	82	101	48	0	0	0	11
saneum50	0	80.6407	24.4471	0	0	23	144.043	78.913	18.3761	7.54329	15	4	15	189	92	120	64	1	1	0	12
saneum51	0	62.5462	25.721	0	0	15	114.467	73.2667	8.56794	3.5146	1	0	1	136	81	104	68	0	0	0	8
saneum52	0	56.7858	31.9615	0	0	36	128.333	84.6389	11.4966	9.72229	9	14	16	156	129	104	64	0	0	0	18
saneum53	0	49.8125	27.1203	1	0	34	135.029	93	12.583	7.61179	18	31	31	171	104	104	69	1	1	1	17
saneum54	0	60.3641	23.8918	0	0	16	132.062	88.125	12.6832	4.12916	5	13	13	162	97	111	80	1	0	1	8
saneum55	1	54.3956	20.9321	0	0	21	129.619	85.4762	16.4696	10.0679	7	9	10	160	108	101	70	1	0	1	11
saneum56	0	62.2861	26.2227	0	0	17	128.294	84	13.0469	8.13173	7	8	10	150	99	112	72	0	0	0	9
saneum57	0	55.3785	17.7939	0	0	21	128.286	82.2857	12.7167	7.14243	8	11	13	148	93	101	67	0	0	0	11
saneum58	1	71.5866	22.3214	0	0	20	113.75	67.85	14.0969	8.84531	2	0	2	136	79	90	46	0	0	0	10
saneum59	0	71.0335	22.4756	1	0	21	168.524	82.8571	6.76475	8.05783	21	9	21	179	104	158	72	1	1	0	11
saneum60	1	70.9733	24.2439	0	0	20	139.15	71.65	16.557	6.14967	13	1	13	179	89	108	64	1	1	0	10
saneum61	0	58.2888	29.1363	0	0	19	136.368	85.3158	14.6257	6.46403	8	9	11	168	96	114	72	1	1	1	10
saneum62	0	79.2772	29.0533	0	0	21	128.952	70.5238	9.52615	6.03008	3	0	3	153	78	109	57	0	0	0	11
saneum63	0	57.7303	27.745	0	0	38	154.342	95.7632	23.2068	16.8738	34	31	37	233	164	119	77	1	1	1	19
saneum64	0	77.1554	20.7111	0	0	23	177.609	95.8696	21.2276	7.86999	23	21	23	230	116	152	84	1	1	1	12
saneum65	1	73.7194	23.1426	0	0	18	177.389	125.389	13.111	16.9259	18	18	18	210	172	146	105	1	1	1	9
saneum66	1	58.7707	19.4245	0	0	23	113.565	59.3913	8.98396	8.76325	0	0	0	131	75	98	45	0	0	0	12
saneum67	1	71.7509	24.8016	0	0	21	119.857	70.381	13.0088	5.54505	3	0	3	152	82	94	62	0	0	0	11
saneum68	0	64.8077	20.6222	0	0	30	110.767	78.6333	8.04163	4.89534	0	3	3	123	88	86	68	0	0	0	15
saneum69	0	75.2717	25.8761	1	0	23	177.13	92.0435	30.8667	11.8532	20	19	20	213	114	103	67	1	1	1	12
saneum70	1	54.705	NA	1	1	20	131.15	84.95	11.301	6.7315	7	14	15	148	93	105	64	0	0	0	10
sewol01	1	59.1376	21.7871	1	1	20	129.35	67.65	14.7515	11.2403	8	1	8	161	85	107	52	0	0	0	10
sewol02	1	57.4867	19.2126	0	0	21	117.476	78.4762	11.8305	5.84482	1	3	4	156	92	102	71	0	0	0	11
sewol03	0	47.5756	24.098	1	0	18	149.278	85.2222	6.95198	5.08233	18	11	18	160	95	137	75	1	1	1	9
sewol04	0	68.2656	26.5487	0	0	12	135.333	86.6667	16.9402	7.73814	7	9	9	159	97	106	72	1	1	1	6
sewol05	0	60.9966	23.0638	1	NA	25	135.72	85.96	12.8631	8.55122	15	16	18	168	98	113	67	1	1	1	13
sewol06	0	60.6543	24.3845	0	0	16	136.438	82.6875	13.8755	6.85778	8	6	9	168	97	119	72	1	1	0	8
sewol07	1	51.499	35.0676	0	1	24	133.042	91.75	12.0126	7.43815	8	20	20	168	101	114	72	1	0	1	12
sewol08	1	51.4935	21.7993	0	0	10	124.1	88.4	18.4117	21.1513	3	5	5	164	123	106	66	1	0	1	5
sewol09	0	56.0082	27.6616	0	0	25	115.6	68.52	8.72258	6.02163	1	0	1	139	83	99	60	0	0	0	13
sewol10	1	NA	20.9321	0	0	17	114.294	77.2941	9.80284	7.44786	1	3	3	141	87	100	63	0	0	0	9
sewol11	0	71.4524	27.0901	0	0	21	128.762	83.0476	11.4013	8.46449	7	10	10	149	100	113	63	0	0	0	11
sewol12	0	65.87	31.4349	1	0	65	137.4	72.6154	12.9093	8.00135	47	2	47	167	87	111	48	1	1	0	33
sewol13	0	52.5448	26.128	NA	NA	23	124.696	81.5652	8.18221	7.56082	3	8	9	140	92	104	57	0	0	0	12
sewol14	1	65.8617	22.3303	0	0	30	123.933	68.2	12.4566	6.87023	5	0	5	153	83	107	55	0	0	0	15
sewol15	0	34.1383	31.8359	0	0	10	129.1	88.9	21.3357	23.197	1	5	5	189	151	115	70	1	0	1	5
sewol16	0	36.2081	26.7229	0	0	9	119	83.3333	26.6224	22.6936	1	6	6	152	107	54	28	0	0	0	5
sewol17	0	46.0972	28.3197	0	0	17	121.824	79.2353	9.03628	13.1364	2	3	3	141	126	110	68	0	0	0	9
sewol18	1	77.8508	26.986	0	0	14	149.429	84.2857	19.3578	7.86842	11	7	11	188	96	123	72	1	1	0	7
sewol19	0	57.8344	24.097	0	0	21	133.762	87.381	12.1569	8.55264	10	13	14	156	102	114	73	1	0	1	11
sewol20	0	69.7659	30.8163	0	0	26	182.769	91.5769	18.8559	5.88675	26	22	26	218	105	147	82	1	1	1	13
sewol21	0	53.3525	21.2295	0	0	24	115.875	75.2083	10.2462	6.96562	0	2	2	133	93	94	62	0	0	0	12
sewol22	0	68.4545	28.951	1	1	22	142.364	78	13.3614	11.5016	15	3	15	168	120	125	66	1	1	0	11
sewol23	1	68.46	20.4946	0	0	27	123.444	71.9259	13.308	6.1264	3	1	4	160	87	98	64	0	0	0	14
sewol24	1	52.6543	23.2216	0	0	8	159.75	106.5	19.543	9.28901	7	7	7	180	112	119	84	1	1	1	4
sewol25	1	55.5729	23.255	0	1	20	155.25	82.55	23.0169	10.7139	17	8	17	189	100	106	64	1	1	0	10
sewol26	1	54.2012	23.3887	0	0	35	119.971	81.6286	19.3657	14.5644	4	8	8	200	132	96	66	0	0	0	18
sewol27	0	39.9945	22.0707	0	0	13	125.615	77.7692	8.45122	3.87629	3	1	3	140	87	116	73	0	0	0	7
sewol28	1	61.5441	24.2349	0	0	25	116.88	78.64	12.6535	12.8966	2	4	4	153	135	103	69	0	0	0	13
sewol29	1	43.3046	25.8645	0	0	19	117.842	80.3158	6.89011	5.4063	0	4	4	128	89	100	72	0	0	0	10
sewol30	1	48.7474	26.4157	0	0	11	123.909	80.4545	6.2041	5.98938	0	3	3	130	88	112	72	0	0	0	6
sewol31	1	51.9644	23.5078	0	0	7	128.286	83.8571	17.5757	13.2342	3	3	3	149	102	101	64	0	0	0	4
sewol32	0	62.653	25.8761	0	0	17	143.353	96.9412	10.6239	5.09253	14	17	17	161	104	126	87	1	1	1	9
sewol33	0	45.0486	28.6218	0	0	24	122.042	77.0417	14.8631	9.05769	5	5	6	145	87	85	52	0	0	0	12
sewol34	1	71.9589	33.4651	0	0	25	145.08	76.68	12.3993	5.01431	21	1	21	173	85	124	66	1	1	0	13
sewol35	1	70.3901	23.8384	0	NA	26	128.846	76.2692	7.89274	4.29472	5	1	5	153	85	115	68	0	0	0	13
sewol36	0	50.3984	26.2107	0	0	24	124.792	79.7917	13.1512	8.49542	4	6	7	166	107	109	66	0	0	0	12
sewol37	0	68.4709	25.9151	0	0	24	138.292	76.25	14.4236	7.16422	14	2	14	168	89	114	63	1	1	0	12
sewol38	0	50.0589	17.2184	0	0	12	89.1667	58.6667	5.14929	2.53461	0	0	0	97	64	80	55	0	0	0	6
sewol39	1	21.5797	28.3848	0	0	15	122.267	80.6667	19.0581	16.003	3	4	4	163	124	84	58	0	0	0	8
sewol40	1	77.1006	21.8036	0	0	13	127.077	76.6154	16.2299	24.4967	2	2	2	164	144	108	56	0	0	0	7
sewol41	1	49.0897	24.0346	0	0	25	120.32	71.96	16.0201	10.0684	3	2	5	162	85	88	56	0	0	0	13
sewol42	1	69.6208	23.1686	0	0	41	135.878	88.5366	22.6	29.6935	17	9	19	212	200	103	68	1	1	1	21
sewol43	1	84.5804	21.0325	NA	NA	48	115.208	74.9375	22.7764	19.0021	8	12	12	200	180	77	54	0	0	0	24
sewol44	1	65.7577	34.2813	0	0	22	131.045	77.8636	8.66013	3.895	9	0	9	147	84	112	70	0	0	0	11
sewol45	1	73.3114	18.9736	0	0	28	117.786	82.6786	13.0508	9.7451	1	14	14	137	96	96	62	0	0	0	14
sewol46	1	50.768	19.9481	1	0	18	119.722	81.1667	14.5352	11.0892	1	1	1	176	124	109	74	0	0	0	9
sewol47	1	40.1205	35.5163	0	0	21	132.333	87.619	7.10868	6.4535	9	15	19	144	95	118	67	1	0	1	11
sewol48	1	61.3415	29.8854	0	0	31	130.129	85.1935	12.244	6.47261	11	16	18	160	101	112	72	1	0	1	16
sewol49	1	65.243	35.5575	1	0	12	152.667	89.4167	18.0571	9.86692	10	8	10	177	108	124	72	1	1	1	6
sewol50	1	80.1697	28.9154	0	0	36	162.444	88.3056	13.2178	7.79311	36	24	36	192	108	139	74	1	1	1	18
sewol51	0	56.9993	27.5556	0	0	14	114.929	77.1429	7.13026	6.81466	0	2	2	124	95	101	69	0	0	0	7
sewol52	0	46.601	25.3906	0	0	9	108.222	71.4444	6.86982	5.24669	0	0	0	117	80	96	64	0	0	0	5
sewol53	0	61.191	25.6918	0	0	27	148.148	88.3333	16.9313	8.52598	19	19	22	180	104	126	67	1	1	1	14
sewol54	0	49.6947	22.6003	0	0	23	122.783	82.8261	17.4042	12.6335	4	9	10	159	111	84	56	0	0	0	12
sewol55	1	60.4627	23.9461	1	1	21	131.286	77.9048	10.9505	6.26821	8	2	8	152	91	106	65	0	0	0	11
sewol56	1	61.0623	23.7387	0	0	19	139.526	92.5789	11.1374	6.89054	13	16	16	163	104	119	78	1	1	1	10
sewol57	1	NA	20.9321	0	0	8	105.375	64.375	13.437	8.2104	0	0	0	131	76	88	56	0	0	0	4
sewol58	0	70.5681	28.5357	0	0	26	128.038	79.8846	18.9325	13.1067	10	9	10	161	99	87	53	0	0	0	13
sewol59	0	38.4066	26.6991	0	0	19	129.737	91.2105	23.3663	28.7297	2	12	12	220	207	108	72	1	0	1	10
sewol60	1	30.7023	28.0816	0	0	11	134.091	72.6364	11.2201	6.62228	6	0	6	160	84	120	64	0	0	0	6
sewol61	1	55.3155	26.8016	0	0	26	131.346	87.8462	13.0689	11.12	7	19	19	168	103	107	66	1	0	1	13
sewol62	0	41.2101	27.3556	1	0	23	123.13	76.3043	7.95044	6.29888	1	1	1	142	96	112	64	0	0	0	12
sewol63	1	54.1656	25.9516	0	0	27	113.074	66.037	22.2329	21.9045	2	3	4	191	157	64	36	0	0	0	14
sewol64	0	53.6071	26.0375	1	0	14	135.571	90.7143	9.61341	4.49664	7	12	12	150	98	120	84	1	1	1	7
sewol65	1	65.9165	24.1115	0	0	20	133.4	87.35	8.50015	6.11534	8	14	16	156	96	116	72	1	0	1	10
KR02_2	0	80	25.8065	0	1	60	132.107	62.8929	9.11384	6.31482	11	0	11	153	71	114	47	0	0	0	30
KR02_5	1	66	25.7812	0	0	60	130.806	78.8333	6.32826	4.12311	13	3	13	142	86	120	68	0	0	0	30
KR02_14	NA	NA	NA	NA	NA	60	138.593	76.3704	10.8069	11.4157	19	2	19	159	109	110	40	1	1	0	30
KR02_27	0	60	28.3053	0	1	60	133.154	81.8077	8.9563	5.69223	11	10	15	159	93	117	71	0	0	0	30
KR02_38	1	74	26.8544	0	0	60	134.808	85.8077	8.76365	5.44808	16	18	21	148	97	110	75	1	0	1	30
KR02_43	1	67	27.9431	0	0	60	131.906	78.4062	9.69656	5.89072	13	4	13	152	90	111	67	0	0	0	30
KR02_48	0	81	26.0226	0	1	60	137.429	79.6429	11.6137	6.62869	9	5	9	153	90	116	68	1	1	0	30
KR02_57	0	77	27.6888	0	1	60	134.033	94.1333	9.72194	8.28681	15	27	27	160	111	116	68	1	0	1	30
KR02_68	1	70	22.9591	1	1	60	132.286	65.0357	11.3394	6.63594	17	0	17	147	75	108	50	0	0	0	30
KR02_71	1	64	22.1453	0	0	60	131.739	87.2609	10.8134	7.67651	11	17	17	149	103	114	75	1	0	1	30
KR02_74	1	77	18.2899	0	0	60	132.633	85.3	11.0093	5.84365	11	17	19	180	98	119	75	1	0	1	30
KR02_79	0	67	28.9993	1	1	60	135.045	100.773	11.3493	11.4806	12	19	21	151	120	111	73	1	1	1	30
KR02_92	0	76	25.3902	0	1	60	133.206	71.2941	12.0095	5.19049	14	0	14	168	81	114	62	0	0	0	30
KR02_98	1	67	29.0006	0	1	60	133.846	91.1923	6.18833	4.76671	6	25	25	151	104	126	82	1	0	1	30
KR02_100	0	78	24.974	1	1	60	130.423	86.9231	7.96077	3.57685	6	21	21	152	96	120	80	1	0	1	30
HUMC11	0	73	27.1111	0	1	32	139.125	74.9062	9.96688	7.15884	24	3	24	156	95	116	61	1	1	0	16
HUMC12	0	51	23.833	0	1	40	134.775	89.775	9.76253	6.09113	18	32	32	166	107	117	79	1	0	1	20
HUMC13	0	75	25.1096	0	0	30	138.333	80.0333	8.14241	5.57385	20	5	20	151	92	122	64	1	1	0	15
HUMC14	1	68	25.6489	0	1	24	139.792	72.625	9.85097	3.79717	16	0	16	167	80	121	65	1	1	0	12
HUMC15	1	68	24.093	0	0	40	135.825	70.2	9.70828	4.22568	21	0	21	167	80	119	62	1	1	0	20
HUMC16	0	62	22.5215	0	0	40	137.35	76.725	13.4175	6.31639	26	5	26	164	90	114	66	1	1	0	20
HUMC17	0	62	21.4573	0	0	36	130.694	71.9444	12.0495	5.03669	9	0	9	174	81	110	61	0	0	0	18
HUMC18	0	55	21.9076	0	1	22	132.455	93	7.27505	5.42481	10	20	20	142	103	113	82	1	0	1	11
HUMC19	1	28	26.7949	0	1	36	134.111	81.6667	9.38929	9.28286	20	17	20	152	97	117	67	0	0	0	18
HUMC110	1	70	24.0055	0	1	28	130.714	82.4643	5.06884	4.44291	7	8	11	139	94	120	75	0	0	0	14
HUMC111	1	70	23.5078	0	1	48	137.875	88.0208	5.55677	3.49766	36	43	44	148	98	126	79	1	1	1	24
HUMC112	0	68	25.8065	1	1	28	139.571	77.6786	11.7865	7.07658	19	1	19	168	97	112	55	1	1	0	14
HUMC113	0	76	25.8761	1	0	32	136.656	90.0312	11.1402	4.92842	20	28	29	167	100	117	81	1	1	1	16
HUMC114	0	76	24.3496	1	1	22	133.455	81.0455	12.6217	7.45448	12	7	15	155	95	108	65	0	0	0	11
HUMC115	1	71	24.977	0	0	40	132.65	65.425	12.5668	5.65634	21	0	21	159	78	103	54	0	0	0	20
HUMC116	1	57	23.8751	0	0	40	135.8	70.575	9.71174	4.15647	20	0	20	167	80	119	62	1	1	0	20
HUMC117	0	54	22.6003	0	1	24	139.792	72.625	9.85097	3.79717	16	0	16	167	80	121	65	1	1	0	12
HUMC118	0	45	23.5556	0	0	20	135.1	70.55	6.34035	4.9255	12	0	12	150	80	121	61	1	1	0	10
HUMC119	0	66	26.6667	0	1	26	137.692	92.1538	14.045	7.43878	18	22	22	155	104	104	74	1	1	1	13
HUMC120	1	54	25.6489	0	0	27	135.704	75.4444	7.87799	5.0637	15	1	15	154	85	121	66	1	1	0	14
HUMC121	0	54	25.1039	1	1	28	130.714	82	7.37793	3.82003	8	8	10	143	89	117	75	0	0	0	14
HUMC122	1	57	27.0416	1	1	36	131.25	77.5833	7.78047	7.13292	12	5	12	150	95	116	61	0	0	0	18
HUMC123	0	76	22.6409	0	1	25	132.48	81.36	13.8176	8.85005	10	8	11	160	100	110	70	0	0	0	13
HUMC124	1	79	26.1286	0	1	28	132.036	82.7857	12.1487	6.93011	11	11	12	152	96	115	74	0	0	0	14
HUMC125	1	65	24.977	0	1	28	130.179	80.5	8.18786	10.9392	8	16	18	144	95	111	57	0	0	0	14
HUMC126	1	66	25.0399	1	0	28	132.75	82.4286	11.6321	4.6859	10	9	12	154	93	114	74	0	0	0	14
HUMC127	1	36	27.0842	0	1	28	131.857	79.9286	4.93449	3.38765	8	3	10	140	87	124	74	0	0	0	14
HUMC128	0	82	22.9719	0	0	38	139.684	77.2632	18.707	7.81435	24	7	25	184	92	104	62	1	1	0	19
HUMC129	1	67	24.093	0	1	40	134.5	75.675	8.72662	4.17801	18	1	18	158	88	118	68	0	0	0	20

## Sheet: Codebook
Columnn names	descriptions
id	Identification
sex	Sex (female =0, male =1)
age	Age calculated using birthday and the first day of home BP measurement
bmi	Body mass index (kg/m2)
dm	Diabetes mellitus (No=0, Yes=1)
dyslipidemia	Dyslipidemia (No=0, Yes=1)
nmeasure	Number of total BP readings
mean.sbp	Mean SBP (mmHg)
mean.dbp	Mean DBP (mmHg)
sd.sbp	SD of SBP (mmHg)
sd.dbp	SD of DBP (mmHg)
n.sbp135	The number of SBP ≥135 mmHg
n.dbp85	The number of DBP ≥85 mmHg
n.htn.135_85	The number of SBP and/or DBP ≥135 and/or 85 mmHg
maxsbp	The maximum value of SBP (mmHg)
maxdbp	The maximum value of DBP (mmHg)
minsbp	The minimal value of SBP (mmHg)
mindbp	The minimal value of DBP (mmHg)
htn	The series of HBPM with mean SBP ≥ 135 and/or mean DBP ≥85 mmHg
sys.htn	The series of HBPM with mean SBP ≥ 135
dia.htn	The series of HBPM with mean DBP ≥ 85
n.half	The smallest integer larger than the half of the number of total BP readings
